# Supplementary material for: Postnatal epigenetic regulation of intestinal stem cells requires DNA methylation and is guided by the microbiome
Source: Springer Nature journal article supplement (doi:10.1186/s13059-015-0763-5), 2015-09-28
Supplement: 13059_2015_763_MOESM2_ESM.pdf [file 13059_2015_763_MOESM2_ESM.pdf]

## **Additional file 2**

### Supplemental Tables

S1\_Table. Lists of CGI mDMR genes

S2\_Table. Lists of non-CGI mDMR genes

S3\_Table. Significantly enriched GO categories associated with mDMR genes

S4\_Table. Age-adjusted regression analysis of correlation between DNA methylation and gene expression

S5\_Table. Composition of diets

S6\_Table. Primers and PCR conditions for genotyping assays

S7\_Table. Summary of WGBS results for genome-wide DNA methylation analysis

S8\_Table. Bisulfite-pyrosequencing primers and sequenced regions for quantitative DNA methylation analysis

S9\_Table. Real-time Taqman assays for gene expression analysis

**Table S1. Lists of CGI mDMR genes****Group 1-mDMR genes associated with methylation gain at 5' CGI**

| Chr   | Gene          | Region   | CGI | Start     | End       | #Bins | DNA Methylation Level (%) |      |             |      |
|-------|---------------|----------|-----|-----------|-----------|-------|---------------------------|------|-------------|------|
|       |               |          |     |           |           |       | ISCs                      |      | Diff. Cells |      |
|       |               |          |     |           |           |       | P0                        | P21  | P0          | P21  |
| chr1  | Gm973         | Upstream | Y   | 59572108  | 59573107  | 1     | 23.7                      | 66.7 | 20.9        | 64.2 |
| chr11 | Trim47        | Upstream | Y   | 115971550 | 115972549 | 3     | 29.8                      | 48.4 | 17.4        | 54.5 |
| chr4  | Marcksl1      | Upstream | Y   | 129189825 | 129190824 | 2     | 29.0                      | 62.9 | 19.6        | 55.7 |
| chr15 | Nrbp2         | Upstream | Y   | 75920444  | 75921443  | 5     | 11.1                      | 43.3 | 6.1         | 40.7 |
| chr3  | Mab2112       | Exon1    | Y   | 86349503  | 86352205  | 8     | 24.2                      | 75.8 | 37.0        | 70.5 |
| chr4  | Enho          | Upstream | Y   | 41587336  | 41588335  | 3     | 39.9                      | 56.9 | 0.2         | 31.0 |
| chr15 | Fam109b       | Upstream | Y   | 82170609  | 82171608  | 3     | 42.0                      | 59.0 | 28.4        | 58.6 |
| chr8  | Tradd         | Exon1    | Y   | 107783337 | 107783529 | 1     | 27.6                      | 52.5 | 33.2        | 62.7 |
| chr5  | lft81         | 5-UTR    | Y   | 123061096 | 123064527 | 4     | 25.5                      | 45.3 | 14.4        | 42.6 |
| chr9  | A730043L09Rik | 5-UTR    | Y   | 62091751  | 62091907  | 1     | 58.3                      | 83.8 | 55.7        | 83.3 |
| chr18 | Camk4         | Upstream | Y   | 33097695  | 33098694  | 2     | 27.4                      | 52.1 | 18.2        | 45.5 |
| chr2  | Mvb12b        | Upstream | Y   | 33743467  | 33744466  | 2     | 65.2                      | 86.9 | 64.2        | 90.9 |
| chr1  | Gm973         | 5-UTR    | Y   | 59573108  | 59573275  | 1     | 23.3                      | 63.1 | 27.9        | 54.4 |
| chr1  | Gm973         | Exon1    | Y   | 59573108  | 59573362  | 1     | 23.3                      | 63.1 | 27.9        | 54.4 |
| chr8  | Marveld3      | Upstream | Y   | 112486106 | 112487105 | 2     | 22.6                      | 53.6 | 0.6         | 26.0 |
| chr16 | Gp1bb         | 5-UTR    | Y   | 18621674  | 18622496  | 4     | 24.8                      | 58.4 | 21.2        | 46.0 |
| chr16 | Gp1bb         | Exon1    | Y   | 18621664  | 18622496  | 4     | 24.8                      | 58.4 | 21.2        | 46.0 |
| chr8  | Cd97          | Upstream | Y   | 86265211  | 86266210  | 2     | 9.4                       | 31.6 | 7.9         | 32.5 |
| chr16 | Litaf         | Upstream | Y   | 10993215  | 10994214  | 2     | 23.7                      | 51.3 | 2.1         | 26.0 |
| chr10 | Kiss1r        | Exon1    | Y   | 79379716  | 79381662  | 5     | 1.3                       | 70.8 | 23.4        | 47.2 |
| chr7  | Stx1b         | Exon1    | Y   | 134967774 | 134968045 | 2     | 23.3                      | 41.5 | 7.2         | 30.8 |
| chr16 | Tiam1         | Exon1    | Y   | 89818206  | 89818597  | 2     | 3.6                       | 33.9 | 1.9         | 25.4 |
| chr9  | Lysmd2        | Upstream | Y   | 75472539  | 75473538  | 4     | 67.1                      | 96.3 | 28.1        | 51.4 |
| chr9  | Rbp1          | Exon1    | Y   | 98325872  | 98326050  | 1     | 38.2                      | 69.2 | 40.4        | 63.6 |
| chr16 | Gpr156        | 5-UTR    | Y   | 37916582  | 37947809  | 3     | 13.2                      | 37.6 | 0.2         | 23.3 |
| chr6  | Tfpi2         | Exon1    | Y   | 3918237   | 3918354   | 2     | 18.5                      | 66.0 | 20.3        | 43.0 |
| chr9  | A730043L09Rik | Upstream | Y   | 62091908  | 62092907  | 1     | 25.8                      | 56.2 | 23.5        | 45.9 |
| chr8  | Car7          | Upstream | Y   | 107063707 | 107064706 | 2     | 11.5                      | 40.3 | 19.5        | 41.3 |
| chr2  | Hoxd4         | 5-UTR    | Y   | 74560035  | 74565335  | 8     | 33.4                      | 72.0 | 47.1        | 68.7 |
| chr2  | Mir219-2      | 5-UTR    | Y   | 29701151  | 29701247  | 1     | 53.5                      | 82.0 | 56.4        | 77.7 |
| chr2  | Spef1         | Exon1    | Y   | 130997638 | 130997761 | 1     | 51.0                      | 77.5 | 55.7        | 76.7 |
| chr2  | Cstad         | Upstream | Y   | 30449564  | 30450563  | 2     | 2.9                       | 29.1 | 11.0        | 31.4 |
| chr2  | Pltp          | Upstream | Y   | 164683209 | 164684208 | 2     | 5.6                       | 34.0 | 3.8         | 23.8 |
| chr13 | Irx4          | 5-UTR    | Y   | 73397945  | 73402382  | 14    | 26.4                      | 44.9 | 18.6        | 38.3 |
| chr11 | Shroom1       | 5-UTR    | Y   | 53270707  | 53276756  | 4     | 40.2                      | 56.4 | 8.3         | 27.8 |
| chr17 | Cldn6         | 5-UTR    | Y   | 23816332  | 23818030  | 3     | 6.5                       | 37.2 | 9.0         | 28.3 |
| chr17 | Cldn6         | Exon1    | Y   | 23816725  | 23816788  | 2     | 11.5                      | 37.2 | 9.0         | 28.3 |
| chr2  | Chst14        | Exon1    | Y   | 118752233 | 118754319 | 5     | 43.9                      | 72.9 | 17.2        | 36.2 |
| chr7  | Ccdc8         | Exon1    | Y   | 17579937  | 17581994  | 3     | 15.9                      | 52.9 | 11.2        | 30.2 |
| chr6  | Eefsec        | Upstream | Y   | 88396534  | 88397533  | 2     | 0.0                       | 18.6 | 0.1         | 18.6 |
| chr6  | Ndnf          | Upstream | Y   | 65620605  | 65621604  | 4     | 23.3                      | 55.9 | 21.9        | 40.4 |
| chr4  | Foxe3         | Upstream | Y   | 114598619 | 114599618 | 3     | 38.2                      | 72.9 | 25.0        | 42.6 |
| chr12 | Clmn          | Upstream | Y   | 106103287 | 106104286 | 3     | 53.2                      | 79.4 | 60.7        | 77.7 |
| chr10 | Csrp2         | Exon1    | Y   | 110369011 | 110369123 | 2     | 29.5                      | 58.0 | 33.3        | 50.2 |

|       |               |          |   |           |           |    |      |      |      |      |
|-------|---------------|----------|---|-----------|-----------|----|------|------|------|------|
| chr7  | Kcnq1ot1      | 5-UTR    | Y | 150399016 | 150482452 | 8  | 53.3 | 73.0 | 47.6 | 64.5 |
| chr4  | Ahdc1         | 5-UTR    | Y | 132567421 | 132617364 | 21 | 58.3 | 90.6 | 14.8 | 31.6 |
| chr11 | Myadml2       | Exon1    | Y | 120508953 | 120509651 | 3  | 45.1 | 83.8 | 54.5 | 70.7 |
| chr11 | Hand1         | Exon1    | Y | 57644746  | 57645649  | 5  | 31.2 | 53.1 | 25.3 | 41.3 |
| chr18 | Pcdhga8       | 5-UTR    | Y | 37885360  | 37885546  | 1  | 28.3 | 47.8 | 34.9 | 50.8 |
| chr7  | Nkx1-2        | Upstream | Y | 139791321 | 139792320 | 3  | 3.5  | 34.1 | 3.4  | 19.3 |
| chr6  | Hoxa2         | Upstream | Y | 52114831  | 52115830  | 3  | 51.0 | 90.8 | 51.6 | 67.4 |
| chr2  | Tspyl3        | Exon1    | Y | 153048106 | 153051177 | 3  | 18.3 | 48.1 | 14.3 | 30.0 |
| chr13 | Mir1904       | Upstream | Y | 110693017 | 110694016 | 5  | 44.0 | 78.8 | 11.0 | 26.6 |
| chr2  | Epb4.1l1      | Upstream | Y | 156245788 | 156246787 | 4  | 54.3 | 91.1 | 25.7 | 41.3 |
| chr5  | Zfp316        | 5-UTR    | Y | 144026336 | 144031701 | 5  | 28.6 | 71.2 | 19.0 | 34.4 |
| chr14 | Zfhx2         | 5-UTR    | Y | 55694073  | 55710885  | 6  | 12.3 | 30.4 | 15.3 | 30.4 |
| chr3  | Mab211        | Exon1    | Y | 55586432  | 55589209  | 8  | 21.0 | 55.9 | 34.3 | 49.4 |
| chr10 | Kiss1r        | 5-UTR    | Y | 79379716  | 79381418  | 4  | 1.3  | 64.1 | 16.1 | 30.6 |
| chr10 | 1810043G02Rik | Upstream | Y | 77440395  | 77441394  | 4  | 1.3  | 46.5 | 1.3  | 15.8 |
| chr5  | Htra3         | Upstream | Y | 36022432  | 36023431  | 2  | 59.1 | 74.8 | 58.9 | 73.3 |
| chr15 | Fam49b        | Upstream | Y | 63892011  | 63893010  | 3  | 37.4 | 75.3 | 23.7 | 38.0 |
| chr7  | Sct           | Upstream | Y | 148465031 | 148466030 | 2  | 15.2 | 38.0 | 8.0  | 21.9 |
| chr8  | B3gnt3        | 5-UTR    | Y | 74217783  | 74225699  | 4  | 0.9  | 35.6 | 16.7 | 30.6 |
| chr9  | Olfm2         | Upstream | Y | 20532659  | 20533658  | 2  | 11.3 | 45.4 | 16.5 | 30.0 |
| chr7  | Arhgef17      | Exon1    | Y | 108077083 | 108080675 | 9  | 62.3 | 86.6 | 20.3 | 33.8 |
| chr2  | St6galnac4    | Exon1    | Y | 32443101  | 32443201  | 1  | 6.0  | 27.5 | 17.5 | 30.8 |
| chr7  | Zbtb45        | Exon1    | Y | 13592373  | 13593678  | 6  | 62.3 | 85.4 | 68.1 | 81.3 |
| chr10 | Bcr           | Exon1    | Y | 74523641  | 74525055  | 7  | 6.4  | 41.9 | 5.2  | 18.3 |
| chr7  | Tmc5          | 5-UTR    | Y | 125740811 | 125766592 | 3  | 2.7  | 59.2 | 15.9 | 28.8 |
| chr6  | Hoxa3         | Exon1    | Y | 52163039  | 52163066  | 1  | 0.7  | 25.6 | 1.8  | 14.7 |
| chr6  | Mgll          | Upstream | Y | 88673406  | 88674405  | 4  | 20.7 | 36.5 | 29.8 | 42.6 |
| chr2  | Tgif2         | Upstream | Y | 156664813 | 156665812 | 5  | 13.8 | 31.8 | 12.4 | 25.1 |
| chr2  | Hoxd3         | 5-UTR    | Y | 74550050  | 74582068  | 33 | 27.7 | 48.4 | 20.5 | 33.1 |
| chr11 | Rnd2          | Exon1    | Y | 101330247 | 101330334 | 1  | 10.4 | 28.4 | 14.5 | 26.9 |
| chr15 | Pkdrej        | Exon1    | Y | 85645106  | 85652163  | 4  | 4.8  | 38.9 | 13.7 | 25.9 |
| chr12 | Sstr1         | Upstream | Y | 59311791  | 59312790  | 2  | 17.8 | 37.1 | 16.7 | 28.9 |
| chr8  | Gm16793       | Upstream | Y | 36652075  | 36653074  | 5  | 16.1 | 37.1 | 42.8 | 54.7 |
| chr9  | Kbtbd13       | Upstream | Y | 65239460  | 65240459  | 2  | 35.5 | 77.9 | 37.0 | 48.8 |
| chr6  | Dennd2a       | Upstream | Y | 39507834  | 39508833  | 4  | 10.4 | 32.4 | 34.6 | 46.3 |
| chr1  | Itpkb         | Exon1    | Y | 182262243 | 182264361 | 6  | 15.6 | 42.3 | 11.3 | 23.0 |
| chr9  | Mras          | 5-UTR    | Y | 99312005  | 99337131  | 4  | 69.0 | 86.6 | 20.3 | 31.6 |
| chr11 | Sox15         | Exon1    | Y | 69468539  | 69469401  | 4  | 10.8 | 63.3 | 44.0 | 55.2 |
| chr4  | Sync          | Exon1    | Y | 128970471 | 128971620 | 5  | 50.6 | 71.7 | 52.2 | 63.4 |
| chr18 | Pcdhga8       | Exon1    | Y | 37885360  | 37887970  | 5  | 33.0 | 50.8 | 38.4 | 49.4 |
| chr15 | Acvrl1        | Upstream | Y | 100957953 | 100958952 | 1  | 18.8 | 52.8 | 32.8 | 43.8 |
| chr17 | Clic5         | Upstream | Y | 44324521  | 44325520  | 3  | 1.3  | 32.6 | 6.9  | 17.8 |
| chr7  | Kcnj11        | 5-UTR    | Y | 53355007  | 53356134  | 5  | 40.9 | 61.9 | 25.0 | 35.7 |
| chr18 | Zfp532        | Exon1    | Y | 65739884  | 65740164  | 2  | 13.3 | 51.6 | 19.3 | 30.0 |
| chr18 | Zfp532        | 5-UTR    | Y | 65739884  | 65782651  | 8  | 13.3 | 51.6 | 5.2  | 15.6 |
| chr6  | Atp2b2        | 5-UTR    | Y | 113792325 | 113992074 | 16 | 8.0  | 38.7 | 22.8 | 33.2 |
| chr6  | Eno2          | Upstream | Y | 124719528 | 124720527 | 3  | 26.2 | 50.0 | 18.6 | 28.7 |
| chr15 | Apobec3       | 5-UTR    | Y | 79722838  | 79722946  | 1  | 11.8 | 44.8 | 17.8 | 27.9 |
| chr15 | Apobec3       | Exon1    | Y | 79722838  | 79722999  | 1  | 11.8 | 44.8 | 17.8 | 27.9 |

|       |               |          |   |           |           |    |      |      |      |      |
|-------|---------------|----------|---|-----------|-----------|----|------|------|------|------|
| chr1  | B3gnt7        | Upstream | Y | 88198796  | 88199795  | 2  | 9.0  | 38.3 | 9.7  | 19.6 |
| chr7  | Catsperg1     | Upstream | Y | 29999053  | 30000052  | 1  | 9.0  | 27.2 | 9.1  | 18.7 |
| chr9  | Csrnp1        | Exon1    | Y | 119893752 | 119893776 | 1  | 25.0 | 43.7 | 30.9 | 40.4 |
| chr5  | Cad           | Upstream | Y | 31356184  | 31357183  | 3  | 4.9  | 25.1 | 3.1  | 12.4 |
| chr19 | Fads3         | Upstream | Y | 10115038  | 10116037  | 4  | 58.0 | 77.6 | 37.3 | 46.2 |
| chr15 | Pvt1          | Upstream | Y | 61868542  | 61869541  | 4  | 37.9 | 63.1 | 30.3 | 39.2 |
| chr1  | Psen2         | 5-UTR    | Y | 182175886 | 182186431 | 5  | 28.1 | 44.2 | 19.2 | 27.9 |
| chr9  | Cgnl1         | Upstream | Y | 71619410  | 71620409  | 2  | 28.8 | 50.4 | 17.8 | 26.5 |
| chr9  | Phldb1        | 5-UTR    | Y | 44536163  | 44543281  | 9  | 21.0 | 44.4 | 5.3  | 13.9 |
| chr9  | Nfrkb         | Upstream | Y | 31192777  | 31193776  | 3  | 32.2 | 47.5 | 10.5 | 19.1 |
| chr7  | Fam53b        | 5-UTR    | Y | 139970897 | 140004879 | 6  | 14.3 | 65.2 | 39.2 | 47.8 |
| chr10 | Nfic          | Upstream | Y | 80889919  | 80890918  | 3  | 30.3 | 53.9 | 24.9 | 33.3 |
| chr13 | Atxn1         | 5-UTR    | Y | 45663787  | 46060360  | 12 | 0.3  | 29.8 | 30.4 | 38.8 |
| chr11 | Fzd2          | Exon1    | Y | 102465745 | 102469372 | 12 | 5.5  | 26.3 | 5.4  | 13.7 |
| chr7  | Gramd1a       | Upstream | Y | 31936070  | 31937069  | 4  | 11.2 | 51.5 | 18.3 | 26.0 |
| chr9  | Fxyd2         | Exon1    | Y | 45216189  | 45216227  | 1  | 60.0 | 83.3 | 70.3 | 78.0 |
| chr5  | Rilpl1        | Upstream | Y | 124981401 | 124982400 | 3  | 26.6 | 51.4 | 16.2 | 23.8 |
| chr17 | Caskin1       | Upstream | Y | 24624728  | 24625727  | 4  | 36.7 | 66.7 | 14.3 | 21.9 |
| chr2  | 4933433C11Rik | Exon1    | Y | 25068809  | 25069103  | 1  | 60.8 | 76.0 | 66.2 | 73.7 |
| chr6  | Scnn1a        | Exon1    | Y | 125271358 | 125272392 | 4  | 6.7  | 38.6 | 35.1 | 42.5 |
| chr12 | 4921506M07Rik | Exon1    | Y | 58676789  | 58677673  | 5  | 5.3  | 23.7 | 6.7  | 13.9 |
| chr13 | Irx4          | Upstream | Y | 73396945  | 73397944  | 3  | 43.1 | 68.3 | 36.3 | 43.3 |
| chr7  | Fancf         | Exon1    | Y | 59115949  | 59117637  | 7  | 0.0  | 46.2 | 20.4 | 27.3 |
| chr15 | Bai1          | Exon1    | Y | 74359360  | 74360370  | 5  | 10.8 | 28.4 | 14.5 | 21.4 |
| chr17 | Prss41        | 5-UTR    | Y | 23981105  | 23981123  | 1  | 0.0  | 15.4 | 5.1  | 11.9 |
| chr14 | Stk24         | Upstream | Y | 121778453 | 121779452 | 5  | 1.7  | 23.9 | 2.5  | 9.3  |
| chr8  | Hsbp1         | Upstream | Y | 121867438 | 121868437 | 3  | 0.4  | 24.0 | 22.7 | 29.3 |
| chr11 | Rasl10b       | Upstream | Y | 83222574  | 83223573  | 5  | 8.7  | 40.9 | 7.6  | 14.2 |
| chr11 | 2810433D01Rik | Upstream | Y | 102485731 | 102486730 | 2  | 62.7 | 80.9 | 70.7 | 77.2 |
| chr10 | H2afy2        | 5-UTR    | Y | 61220644  | 61246612  | 6  | 4.5  | 32.4 | 2.6  | 9.1  |
| chr3  | Rhoc          | 5-UTR    | Y | 104591952 | 104594814 | 4  | 26.1 | 48.2 | 11.9 | 18.3 |
| chr3  | Ccna1         | Upstream | Y | 54858978  | 54859977  | 5  | 16.7 | 33.9 | 2.9  | 9.4  |
| chr6  | Slc41a3       | 5-UTR    | Y | 90554874  | 90561902  | 3  | 8.6  | 24.3 | 7.8  | 14.2 |
| chr2  | Fam78a        | Exon1    | Y | 31938104  | 31939225  | 6  | 4.5  | 23.0 | 12.2 | 18.6 |
| chr2  | Smox          | 5-UTR    | Y | 131317598 | 131337745 | 5  | 18.2 | 41.5 | 4.3  | 10.6 |
| chr4  | Fam110b       | 5-UTR    | Y | 5571326   | 5725730   | 6  | 6.7  | 25.5 | 4.6  | 10.5 |
| chr2  | Nebi          | Upstream | Y | 17652696  | 17653695  | 3  | 7.1  | 23.3 | 2.8  | 8.7  |
| chr11 | Morc2a        | 5-UTR    | Y | 3549497   | 3550382   | 3  | 36.0 | 86.9 | 24.6 | 30.4 |
| chr11 | Morc2a        | Exon1    | Y | 3549497   | 3550149   | 3  | 36.0 | 86.9 | 24.6 | 30.4 |
| chr14 | Gm15217       | Exon1    | Y | 46999954  | 47000061  | 1  | 47.8 | 64.0 | 49.9 | 55.6 |
| chr10 | Csrp2         | 5-UTR    | Y | 110357232 | 110369011 | 4  | 10.4 | 34.1 | 9.7  | 15.5 |
| chr17 | Mllt1         | Upstream | Y | 57074812  | 57075811  | 4  | 1.0  | 46.5 | 15.8 | 21.6 |
| chr11 | Phospho1      | Upstream | Y | 95684814  | 95685813  | 5  | 4.9  | 29.4 | 9.4  | 15.1 |
| chr13 | Smad5         | Upstream | Y | 56803371  | 56804370  | 4  | 1.8  | 17.2 | 6.8  | 12.5 |
| chr14 | Slc39a14      | Upstream | Y | 70751232  | 70752231  | 2  | 13.6 | 34.8 | 4.2  | 9.9  |
| chr2  | Pamr1         | Upstream | Y | 102389178 | 102390177 | 2  | 22.7 | 39.7 | 10.7 | 15.9 |
| chr15 | Prph          | Upstream | Y | 98884605  | 98885604  | 2  | 11.9 | 27.1 | 8.2  | 13.3 |
| chr15 | D730005E14Rik | 5-UTR    | Y | 79719962  | 79723568  | 3  | 11.5 | 30.7 | 12.1 | 17.3 |
| chr19 | Hps6          | Exon1    | Y | 46077968  | 46080663  | 6  | 66.7 | 85.7 | 27.2 | 32.3 |

|       |               |          |   |           |           |    |      |      |      |      |
|-------|---------------|----------|---|-----------|-----------|----|------|------|------|------|
| chr8  | Pcnx12        | Upstream | Y | 128422194 | 128423193 | 2  | 17.6 | 41.7 | 14.8 | 19.9 |
| chr7  | Ifitm10       | 5-UTR    | Y | 149557006 | 149558164 | 5  | 24.3 | 59.6 | 18.2 | 23.1 |
| chr2  | Prdm11        | 5-UTR    | Y | 92854041  | 92886301  | 14 | 0.0  | 37.9 | 12.3 | 17.3 |
| chr16 | Bace2         | Upstream | Y | 97577335  | 97578334  | 2  | 17.8 | 38.6 | 14.8 | 19.6 |
| chr11 | Metrn1        | Upstream | Y | 121562741 | 121563740 | 2  | 8.9  | 27.8 | 7.4  | 12.2 |
| chr16 | Mir193b       | Upstream | Y | 13448616  | 13449615  | 2  | 7.7  | 51.0 | 13.6 | 18.4 |
| chr5  | Tbc1d1        | 5-UTR    | Y | 64551450  | 64564718  | 5  | 0.3  | 44.4 | 18.3 | 23.0 |
| chr9  | Eepd1         | Exon1    | Y | 25289866  | 25290904  | 2  | 45.0 | 61.4 | 62.6 | 67.1 |
| chr16 | Tiam1         | 5-UTR    | Y | 89898813  | 89974944  | 13 | 47.6 | 68.3 | 60.0 | 64.5 |
| chr19 | Peli3         | 5-UTR    | Y | 4941912   | 4943092   | 4  | 50.0 | 71.4 | 14.1 | 18.5 |
| chr17 | Prss41        | Exon1    | Y | 23981044  | 23981123  | 2  | 1.7  | 30.4 | 15.1 | 19.4 |
| chr9  | Clk3          | Upstream | Y | 57613668  | 57614667  | 5  | 49.3 | 64.8 | 16.5 | 20.8 |
| chr15 | Plec          | Upstream | Y | 76061809  | 76062808  | 3  | 15.1 | 33.6 | 14.1 | 18.4 |
| chr1  | Syt2          | 5-UTR    | Y | 136543258 | 136637428 | 12 | 4.8  | 26.8 | 18.5 | 22.8 |
| chr2  | Eef1a2        | Upstream | Y | 180891721 | 180892720 | 2  | 3.2  | 42.5 | 37.9 | 42.1 |
| chr1  | Nos1ap        | Upstream | Y | 172519981 | 172520980 | 3  | 3.9  | 21.0 | 4.5  | 8.6  |
| chr7  | Lipe          | Upstream | Y | 26181007  | 26182006  | 5  | 13.0 | 43.7 | 42.1 | 46.2 |
| chr14 | Sox21         | Exon1    | Y | 118632456 | 118636252 | 14 | 0.3  | 29.6 | 8.0  | 11.9 |
| chr17 | Cbs           | 5-UTR    | Y | 31769973  | 31774150  | 5  | 12.8 | 37.1 | 3.4  | 7.3  |
| chr9  | Mpi           | Upstream | Y | 57400560  | 57401559  | 3  | 28.0 | 50.1 | 49.8 | 53.7 |
| chr7  | Kcnc1         | Upstream | Y | 53650867  | 53651866  | 4  | 4.7  | 27.8 | 7.9  | 11.8 |
| chr12 | Rps6kl1       | 5-UTR    | Y | 86490839  | 86492214  | 3  | 13.8 | 29.9 | 6.9  | 10.7 |
| chr7  | Mir293        | Upstream | Y | 3219344   | 3220343   | 2  | 23.8 | 38.9 | 26.4 | 30.2 |
| chr7  | Zfp94         | 5-UTR    | Y | 25096499  | 25101685  | 3  | 19.7 | 40.3 | 18.4 | 22.2 |
| chr1  | Slc45a3       | 5-UTR    | Y | 133859492 | 133873517 | 6  | 23.3 | 61.7 | 8.0  | 11.8 |
| chr17 | Syng3         | Upstream | Y | 24826895  | 24827894  | 2  | 54.7 | 70.9 | 28.8 | 32.5 |
| chr3  | Gm9833        | Upstream | Y | 10087277  | 10088276  | 3  | 58.7 | 76.7 | 58.9 | 62.5 |
| chr2  | Gata5         | Upstream | Y | 180069385 | 180070384 | 3  | 25.8 | 42.6 | 11.2 | 14.7 |
| chr11 | E130012A19Rik | Exon1    | Y | 97488701  | 97491030  | 10 | 10.3 | 26.4 | 3.9  | 7.4  |
| chr11 | Zkscan17      | Upstream | Y | 59320143  | 59321142  | 2  | 16.8 | 32.8 | 5.8  | 9.3  |
| chr7  | Doc2a         | Upstream | Y | 133990067 | 133991066 | 2  | 33.8 | 55.6 | 43.2 | 46.6 |
| chr10 | Mier2         | Upstream | Y | 79017837  | 79018836  | 4  | 6.5  | 45.6 | 27.3 | 30.7 |
| chr9  | Zfp280d       | Upstream | Y | 72121706  | 72122705  | 2  | 39.9 | 83.7 | 39.4 | 42.7 |
| chr6  | Mira          | Upstream | Y | 52165288  | 52166287  | 4  | 11.2 | 28.2 | 12.9 | 16.2 |
| chr5  | Stag3         | 5-UTR    | Y | 138721737 | 138723102 | 3  | 38.4 | 88.0 | 41.5 | 44.8 |
| chr2  | Rapgef1       | Upstream | Y | 29474240  | 29475239  | 3  | 24.6 | 58.4 | 40.7 | 43.9 |
| chr19 | Gldc          | Upstream | Y | 30249932  | 30250931  | 2  | 0.5  | 21.1 | 5.3  | 8.5  |
| chr7  | Pwwp2b        | Upstream | Y | 146433381 | 146434380 | 5  | 0.0  | 15.5 | 3.1  | 6.3  |
| chr13 | Pom121l2      | Upstream | Y | 22072063  | 22073062  | 1  | 0.0  | 20.8 | 11.9 | 15.1 |
| chr12 | Gpr135        | Upstream | Y | 73171979  | 73172978  | 3  | 53.1 | 90.0 | 30.9 | 34.0 |
| chr16 | 2510009E07Rik | Upstream | Y | 21694739  | 21695738  | 5  | 5.2  | 24.8 | 4.2  | 7.3  |
| chr6  | Gxylt2        | Upstream | Y | 100653728 | 100654727 | 2  | 34.1 | 73.1 | 34.1 | 37.1 |
| chr11 | Prss38        | Upstream | Y | 59189156  | 59190155  | 1  | 55.9 | 71.8 | 69.0 | 72.0 |
| chr1  | Phlda3        | Exon1    | Y | 137662662 | 137663471 | 5  | 15.6 | 49.4 | 4.0  | 7.0  |
| chr17 | Tdrd6         | Exon1    | Y | 43761056  | 43767248  | 7  | 32.3 | 52.6 | 14.2 | 17.1 |
| chr15 | Mgat3         | Upstream | Y | 80003151  | 80004150  | 4  | 35.5 | 53.3 | 28.4 | 31.3 |
| chr4  | Npr2          | Exon1    | Y | 43644807  | 43645723  | 4  | 14.9 | 49.1 | 44.5 | 47.5 |
| chr11 | Kat2a         | Upstream | Y | 100573782 | 100574781 | 2  | 0.7  | 38.2 | 32.0 | 34.7 |
| chr7  | Ggn           | Exon1    | Y | 29955877  | 29958119  | 11 | 0.8  | 21.6 | 25.8 | 28.5 |

|       |               |                 |   |           |           |    |      |      |      |      |
|-------|---------------|-----------------|---|-----------|-----------|----|------|------|------|------|
| chr1  | 4930444P10Rik | Upstream        | Y | 16083123  | 16084122  | 3  | 10.3 | 28.6 | 6.0  | 8.7  |
| chr19 | Add3          | 5-UTR           | Y | 53217246  | 53291310  | 7  | 23.3 | 43.1 | 12.1 | 14.8 |
| chr15 | Trps1         | 5-UTR           | Y | 50678487  | 50721587  | 11 | 0.1  | 15.9 | 5.1  | 7.7  |
| chr4  | Nmnat1        | 5-UTR           | Y | 148848652 | 148859251 | 5  | 32.8 | 70.1 | 58.5 | 61.1 |
| chr12 | Mta1          | Upstream        | Y | 114335489 | 114336488 | 5  | 24.6 | 56.9 | 14.3 | 16.8 |
| chr2  | Gpr176        | Upstream        | Y | 118199156 | 118200155 | 5  | 25.7 | 59.0 | 14.1 | 16.5 |
| chr8  | Zfp358        | Upstream        | Y | 3492138   | 3493137   | 2  | 16.5 | 46.6 | 18.1 | 20.5 |
| chr9  | Snx19         | Exon1           | Y | 30234914  | 30236841  | 2  | 19.9 | 44.5 | 24.2 | 26.6 |
| chr1  | Dnm3          | Upstream        | Y | 164408166 | 164409165 | 2  | 25.0 | 49.1 | 28.7 | 31.1 |
| chr4  | Lzic          | Upstream        | Y | 148858442 | 148859441 | 3  | 5.1  | 23.6 | 7.7  | 10.0 |
| chr6  | Cecr6         | Upstream        | Y | 120443826 | 120444825 | 3  | 0.7  | 24.6 | 8.3  | 10.6 |
| chr11 | Slc35e4       | Exon1           | Y | 3812572   | 3814667   | 10 | 0.7  | 18.0 | 9.3  | 11.5 |
| chr5  | Gpc2          | Upstream        | Y | 138721166 | 138722165 | 5  | 28.9 | 44.5 | 24.9 | 27.1 |
| chr7  | Mir291b       | 5-UTR           | Y | 3219483   | 3219561   | 1  | 19.3 | 36.9 | 19.0 | 21.2 |
| chr7  | Zfp583        | Upstream        | Y | 6282037   | 6283036   | 3  | 21.6 | 59.1 | 15.6 | 17.8 |
| chr7  | Chst8         | 5-UTR           | Y | 35533211  | 35597730  | 9  | 0.6  | 76.0 | 29.6 | 31.7 |
| chr6  | Scnn1a        | 5-UTR           | Y | 125271358 | 125271898 | 2  | 6.7  | 21.9 | 16.7 | 18.7 |
| chr6  | Reep1         | Upstream        | Y | 71656675  | 71657674  | 4  | 16.7 | 44.1 | 40.5 | 42.5 |
| chr11 | Sphk1         | Upstream        | Y | 116392225 | 116393224 | 4  | 34.1 | 50.3 | 24.8 | 26.7 |
| chr1  | Lemd1         | 5-UTR           | Y | 134088013 | 134124798 | 4  | 1.0  | 18.6 | 11.1 | 13.0 |
| chr19 | Sgms1         | 5-UTR           | Y | 32234655  | 32462944  | 10 | 1.2  | 25.7 | 1.3  | 3.0  |
| chr3  | Phf17         | 5-UTR           | Y | 41359656  | 41385142  | 19 | 21.6 | 38.9 | 13.0 | 14.6 |
| chr15 | Kdelr3        | Upstream        | Y | 79345838  | 79346837  | 3  | 2.2  | 28.9 | 9.7  | 11.2 |
| chr2  | Patl2         | 5-UTR           | Y | 121955253 | 122011925 | 5  | 0.2  | 17.8 | 15.7 | 17.2 |
| chr4  | Cep85         | Upstream        | Y | 133743001 | 133744000 | 3  | 4.4  | 20.7 | 3.3  | 4.6  |
| chr13 | Dcdc2a        | Upstream        | Y | 25146873  | 25147872  | 5  | 0.4  | 17.1 | 6.4  | 7.7  |
| chr2  | Olfm1         | Upstream        | Y | 28047613  | 28048612  | 3  | 9.6  | 27.3 | 23.3 | 24.6 |
| chr4  | Tmeff1        | Upstream        | Y | 48597065  | 48598064  | 4  | 3.5  | 42.1 | 1.2  | 2.2  |
| chr2  | Vsx1          | Upstream        | Y | 150514874 | 150515873 | 2  | 12.1 | 41.3 | 46.5 | 47.5 |
| chr2  | Eif3m         | Upstream        | Y | 104857185 | 104858184 | 3  | 0.0  | 36.7 | 0.1  | 1.0  |
| chr11 | Map3k14       | 5-UTR           | Y | 103103685 | 103128715 | 6  | 41.8 | 60.3 | 42.1 | 42.9 |
| chr2  | Vps16         | Upstream        | Y | 130249056 | 130250055 | 5  | 46.5 | 94.1 | 24.9 | 25.8 |
| chr9  | Gpr62         | Exon1           | Y | 106366291 | 106368271 | 8  | 26.0 | 43.1 | 9.5  | 10.4 |
| chr2  | Cdh4          | Upstream        | Y | 179176183 | 179177182 | 4  | 17.6 | 34.5 | 15.4 | 16.3 |
| chr4  | Fndc5         | Upstream        | Y | 128813304 | 128814303 | 5  | 50.0 | 71.4 | 73.3 | 74.1 |
| chr16 | Snn           | 5-UTR           | Y | 11066391  | 11072411  | 5  | 12.8 | 30.8 | 0.6  | 1.3  |
| chr10 | Cdh23         | 5-UTR           | Y | 60120082  | 60159238  | 14 | 9.3  | 40.3 | 11.8 | 12.5 |
| chr15 | Tubgcp6       | Upstream        | Y | 88953581  | 88954580  | 3  | 1.4  | 17.7 | 12.0 | 12.7 |
| chr8  | 4930444A02Rik | Upstream        | Y | 27104594  | 27105593  | 2  | 19.1 | 35.4 | 17.1 | 17.7 |
| chr2  | Prrx2         | Upstream        | Y | 30699887  | 30700886  | 4  | 43.9 | 70.0 | 34.0 | 34.6 |
| chr9  | 4933433G15Rik | 5-UTR           | Y | 75257991  | 75258573  | 2  | 7.0  | 27.1 | 9.2  | 9.7  |
| chr9  | Mapk6         | Upstream        | Y | 75257822  | 75258821  | 3  | 7.0  | 27.1 | 6.2  | 6.7  |
| chr11 | Rasl10a       | Upstream        | Y | 4957131   | 4958130   | 3  | 21.1 | 41.5 | 11.0 | 11.4 |
| chr11 | Mmg2          | 5-UTR           | Y | 62462166  | 62478329  | 4  | 0.0  | 29.8 | 21.9 | 22.3 |
| chr11 | Doc2b         | Upstream        | Y | 75609560  | 75610559  | 5  | 41.5 | 69.9 | 44.1 | 44.4 |
| chr12 | BC022687      | Upstream        | Y | 114046186 | 114047185 | 3  | 5.3  | 23.8 | 20.6 | 21.0 |
| chr11 | Gcgr          | 5-UTR           | Y | 120392041 | 120396070 | 3  | 9.4  | 26.5 | 4.8  | 5.2  |
| chr15 |               | 11-Mar Upstream | Y | 26237827  | 26238826  | 4  | 8.3  | 42.6 | 1.4  | 1.7  |
| chr11 | Cog1          | Upstream        | Y | 113509843 | 113510842 | 4  | 5.5  | 22.7 | 30.6 | 31.0 |

|       |               |          |   |           |           |    |      |      |      |      |
|-------|---------------|----------|---|-----------|-----------|----|------|------|------|------|
| chr13 | Prr7          | 5-UTR    | Y | 55565628  | 55573385  | 11 | 3.5  | 18.9 | 9.5  | 9.8  |
| chr2  | Ocstamp       | Exon1    | Y | 165222721 | 165223720 | 3  | 64.0 | 86.5 | 78.6 | 78.8 |
| chr5  | Kcnk3         | Upstream | Y | 30889543  | 30890542  | 4  | 0.0  | 31.0 | 3.5  | 3.7  |
| chr1  | Abl2          | Upstream | Y | 158487918 | 158488917 | 3  | 1.1  | 27.1 | 0.6  | 0.8  |
| chr4  | Atg4c         | 5-UTR    | Y | 98860625  | 98879326  | 6  | 60.9 | 93.0 | 38.0 | 38.1 |
| chr8  | Smpd3         | 5-UTR    | Y | 108789820 | 108861888 | 8  | 5.0  | 22.6 | 17.7 | 17.8 |
| chr13 | Ddx46         | Upstream | Y | 55735388  | 55736387  | 2  | 28.1 | 43.5 | 10.9 | 10.9 |
| chr2  | Rims4         | Upstream | Y | 163744420 | 163745419 | 5  | 11.1 | 52.7 | 53.5 | 53.4 |
| chr11 | Coa3          | Upstream | Y | 101140263 | 101141262 | 4  | 1.6  | 30.9 | 27.3 | 27.2 |
| chr13 | Spock1        | Upstream | Y | 58009694  | 58010693  | 2  | 0.3  | 22.6 | 14.9 | 14.7 |
| chr7  | Smg1          | Upstream | Y | 125387152 | 125388151 | 5  | 0.0  | 16.7 | 0.7  | 0.5  |
| chr14 | Entpd4        | Upstream | Y | 69954208  | 69955207  | 3  | 3.0  | 26.8 | 2.0  | 1.7  |
| chr2  | Hrh3          | Upstream | Y | 179839113 | 179840112 | 5  | 5.0  | 20.1 | 11.7 | 11.4 |
| chr4  | Adprhl2       | Upstream | Y | 125998948 | 125999947 | 4  | 35.3 | 50.3 | 48.1 | 47.7 |
| chr16 | Col8a1        | 5-UTR    | Y | 57632752  | 57754850  | 3  | 0.0  | 47.6 | 62.9 | 62.4 |
| chr14 | 5031414D18Rik | 5-UTR    | Y | 75415834  | 75431710  | 4  | 17.4 | 34.1 | 7.9  | 7.2  |
| chr5  | Hopx          | Upstream | Y | 77544149  | 77545148  | 1  | 4.3  | 29.6 | 12.3 | 11.5 |
| chr13 | Ror2          | Upstream | Y | 53381479  | 53382478  | 3  | 3.0  | 29.1 | 20.2 | 19.5 |
| chr13 | Arsb          | Upstream | Y | 94540634  | 94541633  | 3  | 0.9  | 26.1 | 1.1  | 0.4  |
| chr17 | Jmjd8         | Upstream | Y | 25964988  | 25965987  | 3  | 0.0  | 23.5 | 17.4 | 16.5 |
| chr10 | Dram1         | Upstream | Y | 87819821  | 87820820  | 3  | 25.3 | 60.8 | 20.1 | 19.2 |
| chr10 | Pdxk          | Upstream | Y | 77927694  | 77928693  | 3  | 1.1  | 21.5 | 15.5 | 14.4 |
| chr16 | Tango2        | 5-UTR    | Y | 18324506  | 18344025  | 4  | 0.0  | 32.1 | 17.1 | 16.0 |
| chr10 | Hcfc2         | Upstream | Y | 82160752  | 82161751  | 2  | 33.7 | 50.0 | 19.6 | 18.4 |
| chr19 | Fbxw4         | Upstream | Y | 45734684  | 45735683  | 3  | 1.2  | 26.3 | 19.0 | 17.8 |
| chr7  | Ceacam9       | Exon1    | Y | 17308974  | 17309333  | 2  | 55.0 | 70.4 | 61.9 | 60.5 |
| chr7  | Snrpn         | 5-UTR    | Y | 67133491  | 67285105  | 6  | 34.9 | 50.6 | 42.0 | 40.5 |
| chr7  | Thrsp         | Upstream | Y | 104566021 | 104567020 | 1  | 19.8 | 39.1 | 42.5 | 41.0 |
| chr4  | Ccnl2         | Upstream | Y | 155185598 | 155186597 | 4  | 27.5 | 80.0 | 21.3 | 19.8 |
| chr4  | Astn2         | Upstream | Y | 66065518  | 66066517  | 3  | 2.7  | 22.1 | 16.7 | 15.1 |
| chr17 | Atp6v1g2      | 5-UTR    | Y | 35373541  | 35373708  | 2  | 0.7  | 16.3 | 3.8  | 2.2  |
| chr9  | Zmynd10       | Exon1    | Y | 107449641 | 107449879 | 2  | 2.6  | 28.9 | 30.7 | 28.9 |
| chr1  | Rps6kc1       | Upstream | Y | 192735650 | 192736649 | 3  | 1.2  | 25.0 | 7.7  | 5.7  |
| chr2  | Eid1          | Upstream | Y | 125497836 | 125498835 | 3  | 29.3 | 58.2 | 52.5 | 50.3 |
| chr11 | Cntd1         | 5-UTR    | Y | 101140517 | 101140619 | 2  | 2.7  | 22.3 | 22.9 | 20.5 |
| chr11 | Cntd1         | Exon1    | Y | 101140517 | 101140794 | 2  | 2.7  | 22.3 | 22.9 | 20.5 |
| chr18 | Slc25a46      | Upstream | Y | 31769557  | 31770556  | 2  | 24.5 | 52.6 | 20.3 | 17.8 |
| chr15 | Dmc1          | 5-UTR    | Y | 79432882  | 79435539  | 4  | 24.8 | 42.3 | 27.5 | 24.9 |
| chr1  | Irs1          | Exon1    | Y | 82283352  | 82288014  | 14 | 22.5 | 51.6 | 40.8 | 38.0 |
| chr14 | 4931414P19Rik | 5-UTR    | Y | 55214554  | 55224745  | 5  | 0.3  | 29.7 | 12.1 | 9.1  |
| chr15 | Bik           | 5-UTR    | Y | 83357292  | 83371729  | 4  | 0.8  | 38.7 | 11.6 | 8.2  |
| chr5  | Limch1        | Upstream | Y | 67136079  | 67137078  | 4  | 50.3 | 89.7 | 7.6  | 3.8  |
| chr9  | Dclk3         | Upstream | Y | 111340585 | 111341584 | 4  | 64.8 | 79.8 | 41.6 | 37.2 |
| chr3  | Efna3         | Upstream | Y | 89126802  | 89127801  | 5  | 9.0  | 51.9 | 36.9 | 32.2 |
| chr3  | St6galnac3    | Upstream | Y | 153388098 | 153389097 | 2  | 0.0  | 19.5 | 11.5 | 6.6  |
| chr4  | Mecr          | Upstream | Y | 131398386 | 131399385 | 2  | 20.1 | 42.3 | 23.3 | 18.2 |
| chr11 | Cnot8         | Upstream | Y | 57916655  | 57917654  | 5  | 38.3 | 80.4 | 29.7 | 24.1 |
| chr7  | Gsg1l         | Upstream | Y | 133225926 | 133226925 | 4  | 25.0 | 45.5 | 32.9 | 27.2 |
| chr7  | Rasl2-9       | Upstream | Y | 5077553   | 5078552   | 3  | 15.4 | 53.4 | 18.9 | 13.2 |

|       |               |          |   |           |           |    |      |      |      |      |
|-------|---------------|----------|---|-----------|-----------|----|------|------|------|------|
| chr4  | Eps15         | Upstream | Y | 108951880 | 108952879 | 2  | 35.0 | 54.8 | 22.1 | 15.0 |
| chr6  | Gpr37         | Exon1    | Y | 25638113  | 25639980  | 8  | 3.2  | 27.9 | 14.3 | 7.2  |
| chr15 | Tnrc6b        | 5-UTR    | Y | 80541743  | 80590015  | 6  | 7.8  | 41.3 | 8.3  | 1.1  |
| chr12 | Ralgapa1      | Upstream | Y | 56922155  | 56923154  | 2  | 22.6 | 43.7 | 20.5 | 12.5 |
| chr8  | Cdh15         | Exon1    | Y | 125372274 | 125372429 | 2  | 10.2 | 27.3 | 14.6 | 6.4  |
| chr7  | Tgfb1         | Upstream | Y | 26471021  | 26472020  | 5  | 14.6 | 40.5 | 45.3 | 37.0 |
| chr15 | Zfp641        | Upstream | Y | 98126515  | 98127514  | 3  | 50.8 | 68.9 | 64.1 | 55.8 |
| chr16 | Paxbp1        | Upstream | Y | 91044625  | 91045624  | 5  | 0.0  | 15.1 | 9.4  | 1.1  |
| chr5  | Fras1         | Upstream | Y | 96801974  | 96802973  | 3  | 0.6  | 19.5 | 10.3 | 1.5  |
| chr14 | Atg14         | Upstream | Y | 48188110  | 48189109  | 2  | 36.6 | 36.5 | 0.5  | 76.5 |
| chr14 | Uggt2         | Upstream | Y | 119498657 | 119499656 | 3  | 73.8 | 84.6 | 24.3 | 83.3 |
| chr8  | Tppp3         | Upstream | Y | 107995323 | 107996322 | 2  | 75.0 | 85.0 | 0.2  | 48.3 |
| chr4  | Ptprf         | Upstream | Y | 117964003 | 117965002 | 2  | 78.5 | 88.3 | 42.7 | 90.8 |
| chr4  | Xkr8          | Upstream | Y | 132288462 | 132289461 | 2  | 93.5 | 93.4 | 48.4 | 94.0 |
| chr8  | Map10         | Upstream | Y | 128192718 | 128193717 | 3  | 91.7 | 97.1 | 60.3 | 98.8 |
| chr19 | Ehbp111       | Exon1    | Y | 5725917   | 5726317   | 2  | 62.7 | 64.0 | 21.4 | 56.7 |
| chr5  | Shh           | Upstream | Y | 28793642  | 28794641  | 1  | 14.8 | 17.6 | 3.5  | 36.3 |
| chr5  | Sirt4         | 5-UTR    | Y | 115933121 | 115934493 | 3  | 35.6 | 27.2 | 0.4  | 31.9 |
| chr13 | Nsd1          | Upstream | Y | 55310143  | 55311142  | 1  | 67.8 | 74.6 | 53.2 | 84.3 |
| chr2  | Gm13889       | Upstream | Y | 93797258  | 93798257  | 3  | 50.0 | 49.4 | 21.8 | 51.1 |
| chr11 | Fbxo39        | 5-UTR    | Y | 72127946  | 72130325  | 2  | 56.0 | 69.5 | 33.6 | 62.7 |
| chr14 | Slc7a7        | 5-UTR    | Y | 55027842  | 55036539  | 3  | 63.0 | 74.5 | 49.6 | 77.0 |
| chr13 | Dbn1          | Upstream | Y | 55589438  | 55590437  | 2  | 44.6 | 41.2 | 21.1 | 48.3 |
| chr6  | Hoxa2         | 5-UTR    | Y | 52114644  | 52114830  | 1  | 53.3 | 53.2 | 33.9 | 60.3 |
| chr6  | Arl8b         | Upstream | Y | 108732053 | 108733052 | 2  | 0.4  | 0.5  | 0.1  | 26.4 |
| chr15 | Asap1         | Upstream | Y | 64214482  | 64215481  | 2  | 24.6 | 31.0 | 11.7 | 37.4 |
| chr9  | Ube2q2        | Upstream | Y | 54996176  | 54997175  | 4  | 24.9 | 33.5 | 12.9 | 38.6 |
| chr11 | Rasgef1c      | 5-UTR    | Y | 49715337  | 49770541  | 6  | 80.8 | 74.6 | 39.7 | 65.1 |
| chr14 | Adcy4         | Upstream | Y | 56402857  | 56403856  | 2  | 37.5 | 49.1 | 38.5 | 64.0 |
| chr8  | Bean1         | Upstream | Y | 106693413 | 106694412 | 3  | 34.4 | 28.2 | 32.7 | 57.0 |
| chr8  | B3gnt3        | Exon1    | Y | 74217216  | 74217798  | 4  | 77.5 | 80.3 | 52.5 | 76.1 |
| chr4  | Hes5          | Upstream | Y | 154334032 | 154335031 | 5  | 68.6 | 61.0 | 25.6 | 48.1 |
| chr8  | 1700067K01Rik | Exon1    | Y | 86525605  | 86525804  | 2  | 79.8 | 93.2 | 71.8 | 94.3 |
| chr8  | Stox2         | 5-UTR    | Y | 48288608  | 48437702  | 14 | 56.3 | 67.7 | 10.3 | 32.5 |
| chr9  | Ddx43         | Upstream | Y | 78242584  | 78243583  | 3  | 28.1 | 33.9 | 17.5 | 38.9 |
| chr17 | Gm7325        | 5-UTR    | Y | 45738621  | 45739051  | 1  | 49.2 | 49.2 | 39.3 | 60.6 |
| chr19 | Apba1         | Exon1    | Y | 23967225  | 23968510  | 7  | 76.0 | 71.4 | 32.1 | 53.2 |
| chr15 | Fmnl3         | Upstream | Y | 99200898  | 99201897  | 2  | 45.8 | 45.7 | 18.6 | 39.6 |
| chr13 | Nsd1          | Exon1    | Y | 55311143  | 55311236  | 1  | 74.6 | 88.5 | 70.9 | 91.9 |
| chr11 | Shroom1       | Exon1    | Y | 53276725  | 53277695  | 6  | 52.0 | 51.4 | 6.8  | 26.8 |
| chr11 | Dnaic2        | Upstream | Y | 114587726 | 114588725 | 2  | 19.0 | 30.4 | 11.2 | 30.7 |
| chr10 | Atcay         | Exon1    | Y | 80693237  | 80693524  | 2  | 22.2 | 28.3 | 14.9 | 34.4 |
| chr6  | Hoxa2         | Exon1    | Y | 52114265  | 52114830  | 3  | 54.4 | 54.4 | 35.3 | 54.7 |
| chr4  | Dnajc11       | Upstream | Y | 151306829 | 151307828 | 4  | 46.9 | 42.6 | 16.7 | 36.0 |
| chr19 | Tex40         | Upstream | Y | 6999871   | 7000870   | 4  | 18.5 | 29.5 | 16.9 | 36.3 |
| chr17 | Pacsin1       | Upstream | Y | 27791627  | 27792626  | 4  | 63.0 | 70.0 | 17.5 | 36.8 |
| chr15 | Zfp641        | 5-UTR    | Y | 98124235  | 98126514  | 4  | 0.7  | 3.0  | 29.7 | 48.3 |
| chr12 | Sptb          | 5-UTR    | Y | 77750912  | 77811534  | 9  | 44.3 | 53.8 | 22.6 | 41.1 |
| chr11 | Sec24a        | Upstream | Y | 51570337  | 51571336  | 2  | 2.7  | 0.0  | 2.1  | 20.4 |



|       |               |          |   |           |           |    |      |      |      |      |
|-------|---------------|----------|---|-----------|-----------|----|------|------|------|------|
| chr16 | Heg1          | Upstream | Y | 33683552  | 33684551  | 2  | 24.4 | 34.6 | 14.3 | 32.4 |
| chr5  | Pds5b         | Upstream | Y | 151475402 | 151476401 | 3  | 23.4 | 18.2 | 0.6  | 18.5 |
| chr14 | Amer2         | Upstream | Y | 60996123  | 60997122  | 3  | 44.9 | 40.2 | 16.0 | 33.7 |
| chr8  | Ccdc110       | Exon1    | Y | 47020372  | 47020518  | 1  | 50.4 | 53.6 | 41.3 | 58.9 |
| chr18 | Elac1         | Upstream | Y | 73914134  | 73915133  | 4  | 76.6 | 70.5 | 57.2 | 73.5 |
| chr3  | Gm9833        | 5-UTR    | Y | 10088277  | 10089618  | 1  | 36.2 | 41.2 | 27.0 | 43.2 |
| chr15 | Nr4a1         | Upstream | Y | 101096277 | 101097276 | 4  | 29.9 | 25.9 | 12.5 | 28.6 |
| chr8  | Bean1         | 5-UTR    | Y | 106694413 | 106705630 | 7  | 48.1 | 59.4 | 12.7 | 28.6 |
| chr10 | Slc2a12       | Upstream | Y | 22363817  | 22364816  | 1  | 22.8 | 36.6 | 19.5 | 35.4 |
| chr17 | Prss41        | Upstream | Y | 23981124  | 23982123  | 1  | 11.7 | 24.9 | 18.5 | 34.4 |
| chr5  | 9530036O11Rik | 5-UTR    | Y | 28793524  | 28793888  | 2  | 8.0  | 11.3 | 2.8  | 18.6 |
| chr4  | Msantd3       | Upstream | Y | 48551818  | 48552817  | 2  | 20.5 | 28.3 | 25.9 | 41.6 |
| chr11 | Cuedc1        | 5-UTR    | Y | 87912648  | 87983334  | 14 | 24.2 | 38.6 | 15.6 | 31.3 |
| chr4  | B930041F14Rik | Upstream | Y | 155067451 | 155068450 | 3  | 1.7  | 0.9  | 1.0  | 16.6 |
| chr4  | Gm13238       | Upstream | Y | 145426122 | 145427121 | 1  | 44.0 | 52.8 | 36.5 | 52.0 |
| chr4  | Fbxo10        | Upstream | Y | 45097477  | 45098476  | 2  | 24.7 | 28.0 | 12.4 | 27.7 |
| chr4  | Glis1         | Upstream | Y | 107106324 | 107107323 | 4  | 30.9 | 37.8 | 7.6  | 22.9 |
| chr3  | Zfp704        | Upstream | Y | 9610086   | 9611085   | 3  | 7.3  | 13.9 | 2.8  | 18.0 |
| chr7  | Ccdc114       | Exon1    | Y | 53184437  | 53184626  | 1  | 45.0 | 53.1 | 44.5 | 59.8 |

**Group 2-mDMR genes associated with methylation gain at gene body and 3' CGI**

| Chr   | Gene     | Region    | CGI | Start     | End       | #Bins | DNA Methylation Level (%) |      |             |      |
|-------|----------|-----------|-----|-----------|-----------|-------|---------------------------|------|-------------|------|
|       |          |           |     |           |           |       | ISCs                      |      | Diff. Cells |      |
|       |          |           |     |           |           |       | P0                        | P21  | P0          | P21  |
| chr12 | Gsc      | Downstre: | Y   | 105708419 | 105709418 | 1     | 18.4                      | 57.1 | 8.8         | 62.8 |
| chr11 | Trim7    | 3-UTR     | Y   | 48663492  | 48663697  | 1     | 38.7                      | 69.8 | 20.8        | 69.6 |
| chr8  | Slc9a5   | Intron1   | Y   | 107873473 | 107877322 | 2     | 44.8                      | 76.4 | 25.8        | 72.1 |
| chr18 | Pcdhga1  | 3-UTR     | Y   | 37999784  | 38001524  | 4     | 8.3                       | 50.0 | 15.3        | 61.5 |
| chr18 | Pcdhga3  | 3-UTR     | Y   | 37999784  | 38001526  | 4     | 8.3                       | 50.0 | 15.3        | 61.5 |
| chr18 | Pcdhga8  | 3-UTR     | Y   | 37999784  | 38001526  | 4     | 8.3                       | 50.0 | 15.3        | 61.5 |
| chr18 | Pcdhgb4  | 3-UTR     | Y   | 37999784  | 38001524  | 4     | 8.3                       | 50.0 | 15.3        | 61.5 |
| chr19 | Kank1    | Intron4   | Y   | 25453021  | 25483575  | 3     | 4.7                       | 46.2 | 2.8         | 48.5 |
| chr15 | Baiap2l2 | Intron8   | Y   | 79101083  | 79101631  | 2     | 12.9                      | 56.6 | 12.8        | 58.2 |
| chr13 | Rgs14    | Intron7   | Y   | 55481053  | 55481365  | 1     | 25.4                      | 61.7 | 26.5        | 69.3 |
| chr18 | Pde6a    | Exon10    | Y   | 61416638  | 61416703  | 1     | 44.9                      | 69.0 | 40.3        | 82.8 |
| chr11 | Kdm6b    | LastExon  | Y   | 69212020  | 69213351  | 4     | 51.7                      | 81.5 | 42.5        | 84.0 |
| chr11 | BC096441 | Intron12  | Y   | 69508944  | 69509097  | 1     | 11.9                      | 33.3 | 8.0         | 47.8 |
| chr2  | Hoxd4    | Exon4     | Y   | 74564933  | 74565762  | 4     | 18.1                      | 73.0 | 26.5        | 66.0 |
| chr11 | Kdm6b    | 3-UTR     | Y   | 69212020  | 69213327  | 3     | 51.7                      | 81.5 | 43.6        | 83.1 |
| chr8  | Mcf2l    | Intron1   | Y   | 12916055  | 12963163  | 2     | 19.6                      | 66.5 | 19.4        | 58.8 |
| chr4  | Rcc2     | Intron2   | Y   | 140258351 | 140263865 | 5     | 4.5                       | 38.8 | 2.1         | 40.8 |
| chr8  | Jak3     | Intron6   | Y   | 74203744  | 74204333  | 3     | 75.3                      | 93.4 | 35.7        | 74.1 |
| chr8  | Zdhhc1   | Downstre: | Y   | 107995325 | 107996324 | 3     | 58.4                      | 85.0 | 17.4        | 55.6 |
| chr10 | B4galnt1 | Exon7     | Y   | 126607034 | 126607224 | 1     | 32.4                      | 77.3 | 38.1        | 75.4 |
| chr18 | Pcdhga1  | Downstre: | Y   | 38001525  | 38002524  | 1     | 8.3                       | 50.0 | 16.3        | 53.2 |
| chr18 | Pcdhga3  | Downstre: | Y   | 38001527  | 38002526  | 1     | 8.3                       | 50.0 | 16.3        | 53.2 |
| chr18 | Pcdhga8  | Downstre: | Y   | 38001527  | 38002526  | 1     | 8.3                       | 50.0 | 16.3        | 53.2 |
| chr18 | Pcdhga9  | Downstre: | Y   | 38001518  | 38002517  | 1     | 8.3                       | 50.0 | 16.3        | 53.2 |
| chr18 | Pcdhgb4  | Downstre: | Y   | 38001525  | 38002524  | 1     | 8.3                       | 50.0 | 16.3        | 53.2 |

|       |           |                |   |           |           |    |      |      |      |      |
|-------|-----------|----------------|---|-----------|-----------|----|------|------|------|------|
| chr13 | Pde4d     | Intron8        | Y | 110693898 | 110724075 | 2  | 44.0 | 78.8 | 44.0 | 80.4 |
| chr7  | Capns1    | Exon8          | Y | 30977886  | 30977919  | 1  | 68.2 | 87.5 | 50.2 | 86.6 |
| chr4  | Al464131  | LastExon       | Y | 41442634  | 41446723  | 12 | 24.1 | 71.3 | 34.2 | 70.4 |
| chr11 | Nags      | Intron5        | Y | 102009296 | 102009405 | 1  | 46.9 | 76.8 | 39.7 | 75.6 |
| chr7  | Capns1    | Intron8        | Y | 30977612  | 30977885  | 1  | 60.9 | 77.6 | 50.0 | 85.9 |
| chr12 | Mycn      | LastExon       | Y | 12942899  | 12944416  | 4  | 38.8 | 82.6 | 38.4 | 74.2 |
| chr16 |           | 5-Sep LastExon | Y | 18621904  | 18622889  | 2  | 24.8 | 79.4 | 33.2 | 68.6 |
| chr16 |           | 5-Sep 3-UTR    | Y | 18621904  | 18622832  | 2  | 24.8 | 79.4 | 33.2 | 68.6 |
| chr16 | Gp1bb     | 3-UTR          | Y | 18620412  | 18620814  | 2  | 46.1 | 95.5 | 47.5 | 82.7 |
| chr17 | Rab11fip3 | Intron14       | Y | 26173628  | 26204526  | 1  | 33.7 | 56.0 | 22.1 | 56.6 |
| chr11 | Shroom1   | LastExon       | Y | 53280265  | 53281257  | 3  | 8.3  | 24.0 | 7.2  | 40.8 |
| chr11 | Arhgap27  | Exon6          | Y | 103195572 | 103195677 | 1  | 29.4 | 64.3 | 26.5 | 59.9 |
| chr2  | Proser2   | LastExon       | Y | 6019546   | 6022406   | 6  | 51.9 | 90.2 | 46.1 | 79.4 |
| chr7  | Phldb3    | Intron3        | Y | 25398033  | 25401850  | 1  | 22.2 | 72.9 | 32.5 | 65.0 |
| chr3  | Lrba      | Intron40       | Y | 86346634  | 86409791  | 9  | 24.2 | 75.8 | 38.1 | 70.5 |
| chr5  | Card11    | LastExon       | Y | 141348953 | 141349483 | 2  | 16.7 | 59.7 | 23.2 | 55.4 |
| chr16 | Scarf2    | Intron9        | Y | 17805018  | 17806441  | 2  | 20.0 | 46.6 | 22.7 | 54.6 |
| chr18 | Pcdhga1   | LastExon       | Y | 37999557  | 38001524  | 5  | 49.5 | 69.1 | 38.9 | 70.7 |
| chr18 | Pcdhga3   | LastExon       | Y | 37999557  | 38001526  | 5  | 49.5 | 69.1 | 38.9 | 70.7 |
| chr18 | Pcdhga8   | LastExon       | Y | 37999557  | 38001526  | 5  | 49.5 | 69.1 | 38.9 | 70.7 |
| chr18 | Pcdhgb4   | LastExon       | Y | 37999557  | 38001524  | 5  | 49.5 | 69.1 | 38.9 | 70.7 |
| chr8  | lsyna1    | Downstre:      | Y | 73121190  | 73122189  | 4  | 71.8 | 88.0 | 43.1 | 74.8 |
| chr9  | Dixdc1    | Intron19       | Y | 50519078  | 50535890  | 3  | 36.3 | 68.4 | 35.5 | 66.8 |
| chr17 | Stap2     | Intron6        | Y | 56139439  | 56139509  | 1  | 64.4 | 91.6 | 55.2 | 86.4 |
| chr9  | P4htm     | Intron7        | Y | 108486164 | 108499229 | 1  | 26.8 | 69.1 | 36.5 | 67.4 |
| chr7  | Pkp3      | Intron10       | Y | 148274824 | 148275143 | 1  | 60.2 | 85.5 | 49.1 | 80.0 |
| chr3  | Npr1      | Intron21       | Y | 90267933  | 90268716  | 2  | 53.2 | 76.6 | 49.2 | 80.0 |
| chr2  | Sp5       | 3-UTR          | Y | 70315227  | 70315783  | 2  | 4.5  | 44.2 | 5.5  | 36.0 |
| chr16 | Tiam1     | Intron12       | Y | 89813373  | 89822122  | 3  | 3.6  | 33.9 | 7.0  | 37.2 |
| chr8  | Marveld3  | LastExon       | Y | 112471809 | 112472562 | 4  | 32.3 | 68.2 | 42.5 | 72.7 |
| chr2  | Bmp2      | Intron2        | Y | 133380505 | 133386609 | 2  | 12.3 | 40.4 | 20.0 | 50.0 |
| chr8  | Klf2      | LastExon       | Y | 74844643  | 74845553  | 2  | 46.8 | 69.7 | 41.9 | 71.7 |
| chr11 | Trim7     | LastExon       | Y | 48662980  | 48663697  | 4  | 55.1 | 78.2 | 52.5 | 81.5 |
| chr15 | Baiap2l2  | Exon8          | Y | 79101632  | 79101748  | 1  | 9.6  | 32.2 | 7.6  | 36.5 |
| chr17 | Cldn6     | Intron2        | Y | 23816789  | 23818014  | 1  | 11.5 | 37.2 | 15.4 | 44.3 |
| chr15 | Copz1     | Downstre:      | Y | 103130296 | 103131295 | 2  | 35.9 | 69.8 | 44.9 | 73.7 |
| chr15 | Baiap2l2  | Intron7        | Y | 79092396  | 79100935  | 3  | 41.4 | 86.1 | 19.5 | 48.3 |
| chr9  | Icam5     | 3-UTR          | Y | 20843345  | 20843480  | 1  | 29.4 | 61.7 | 34.0 | 62.7 |
| chr11 | Plekhh3   | Intron3        | Y | 101025786 | 101025972 | 1  | 53.2 | 75.0 | 49.3 | 77.9 |
| chr11 | Rnd2      | Intron2        | Y | 101330335 | 101331326 | 1  | 42.5 | 80.0 | 40.2 | 68.6 |
| chr12 | Rapgef5   | Intron12       | Y | 118927156 | 118927620 | 2  | 42.5 | 69.1 | 38.8 | 67.1 |
| chr5  | lft81     | Intron18       | Y | 123061117 | 123064446 | 4  | 25.5 | 45.3 | 14.4 | 42.6 |
| chr17 | Prr18     | 3-UTR          | Y | 8533872   | 8536978   | 8  | 70.5 | 86.2 | 17.3 | 45.5 |
| chr6  | Wipf3     | Intron4        | Y | 54435927  | 54437901  | 1  | 15.5 | 58.9 | 13.3 | 41.5 |
| chr18 | Jakmip2   | Intron20       | Y | 43741985  | 43750201  | 1  | 20.0 | 52.2 | 43.3 | 71.4 |
| chr4  | Arhgef19  | Intron4        | Y | 140803146 | 140803292 | 1  | 32.4 | 71.9 | 40.2 | 68.3 |
| chr7  | Phldb3    | Intron2        | Y | 25397699  | 25397894  | 1  | 29.5 | 46.5 | 23.8 | 51.8 |
| chr10 | Cdk19     | Intron2        | Y | 40114207  | 40154109  | 2  | 42.5 | 75.6 | 37.0 | 65.0 |
| chr2  | Nr1h3     | Exon4          | Y | 91030619  | 91030798  | 1  | 39.8 | 62.4 | 41.0 | 69.0 |

|       |               |           |   |           |           |    |      |      |      |      |
|-------|---------------|-----------|---|-----------|-----------|----|------|------|------|------|
| chr19 | Rps6ka4       | Intron6   | Y | 6905938   | 6906257   | 2  | 50.3 | 79.4 | 44.8 | 72.7 |
| chr12 | Amn           | Intron3   | Y | 112510154 | 112512353 | 3  | 42.1 | 61.8 | 33.7 | 61.4 |
| chr11 | Gal3st1       | LastExon  | Y | 3897929   | 3899331   | 7  | 56.0 | 78.3 | 53.6 | 81.2 |
| chr10 | B4galnt1      | Intron8   | Y | 126607225 | 126607646 | 2  | 16.0 | 77.3 | 45.1 | 72.0 |
| chr13 | Pde4d         | Exon7     | Y | 110693785 | 110693897 | 2  | 44.0 | 78.8 | 26.4 | 52.8 |
| chr7  | Dmpk          | Intron14  | Y | 19677604  | 19677891  | 2  | 51.9 | 71.2 | 47.3 | 73.7 |
| chr8  | Jak3          | Exon4     | Y | 74203101  | 74203246  | 1  | 67.8 | 87.2 | 67.6 | 94.0 |
| chr8  | Nfix          | Intron8   | Y | 87251867  | 87295682  | 5  | 7.2  | 35.3 | 14.9 | 41.2 |
| chr19 | Pcsk5         | Intron1   | Y | 17508266  | 17510942  | 1  | 37.1 | 66.7 | 37.5 | 63.6 |
| chr19 | 2700081O15Rik | Intron4   | Y | 7496953   | 7497132   | 1  | 62.6 | 87.9 | 62.8 | 88.9 |
| chr11 | Epn3          | Intron1   | Y | 94352794  | 94352884  | 1  | 31.7 | 68.3 | 38.7 | 64.6 |
| chr1  | Nrp2          | Intron15  | Y | 62832876  | 62859107  | 3  | 19.0 | 40.9 | 13.6 | 39.4 |
| chr9  | Igdcc4        | Intron6   | Y | 64970614  | 64971582  | 3  | 39.3 | 84.6 | 55.2 | 80.9 |
| chr1  | G0s2          | LastExon  | Y | 195098354 | 195098996 | 4  | 7.7  | 59.3 | 45.4 | 70.9 |
| chr17 | Stap2         | Exon6     | Y | 56139510  | 56139579  | 1  | 36.0 | 54.8 | 28.7 | 54.1 |
| chr6  | Tspan33       | Downstre: | Y | 29668559  | 29669558  | 2  | 35.2 | 61.1 | 45.2 | 70.1 |
| chr18 | Pde6a         | Intron10  | Y | 61414101  | 61416637  | 1  | 23.2 | 60.0 | 31.8 | 56.6 |
| chr2  | Lzts3         | LastExon  | Y | 130458575 | 130461200 | 4  | 57.9 | 76.7 | 51.4 | 76.1 |
| chr11 | Ccr10         | Intron1   | Y | 101035993 | 101036713 | 1  | 57.1 | 80.6 | 50.0 | 74.6 |
| chr4  | Trim14        | Downstre: | Y | 46518719  | 46519718  | 2  | 14.0 | 41.2 | 20.7 | 45.2 |
| chr19 | Efemp2        | Intron2   | Y | 5475179   | 5475407   | 1  | 39.5 | 66.7 | 39.5 | 64.0 |
| chr8  | Zfpm1         | 3-UTR     | Y | 124861092 | 124861147 | 1  | 55.8 | 88.1 | 61.1 | 85.3 |
| chr18 | Ctif          | Intron3   | Y | 75631675  | 75679392  | 4  | 11.9 | 38.8 | 34.4 | 58.2 |
| chr11 | Tlcd2         | Intron1   | Y | 75281880  | 75282058  | 1  | 29.4 | 70.2 | 33.0 | 56.8 |
| chr9  | Cacna2d2      | 3-UTR     | Y | 107429796 | 107431674 | 1  | 49.4 | 80.8 | 48.2 | 71.9 |
| chr10 | Phactr2       | Intron12  | Y | 13011769  | 13193861  | 11 | 72.2 | 93.4 | 12.8 | 36.2 |
| chr5  | Shh           | Intron2   | Y | 28788124  | 28793000  | 16 | 3.5  | 44.4 | 5.0  | 28.4 |
| chr11 | Phospho1      | Intron2   | Y | 95690090  | 95691864  | 3  | 45.4 | 79.8 | 26.4 | 49.4 |
| chr16 | Gpr156        | Intron1   | Y | 37916702  | 37947453  | 3  | 13.2 | 37.6 | 0.2  | 23.3 |
| chr8  | Fbxl8         | LastExon  | Y | 107791910 | 107793226 | 7  | 72.6 | 88.5 | 58.8 | 81.8 |
| chr2  | Spef1         | 3-UTR     | Y | 130995997 | 130997418 | 2  | 26.5 | 51.7 | 16.8 | 39.7 |
| chr2  | Hoxd3         | Intron2   | Y | 74582613  | 74584378  | 2  | 19.0 | 60.9 | 25.0 | 47.7 |
| chr4  | 1300002K09Rik | Exon6     | Y | 45881949  | 45882077  | 1  | 36.5 | 69.3 | 43.4 | 65.9 |
| chr9  | Cacna2d2      | LastExon  | Y | 107429652 | 107431674 | 2  | 37.1 | 65.1 | 34.8 | 57.3 |
| chr7  | Rcn3          | Intron5   | Y | 52344071  | 52346810  | 2  | 56.0 | 82.6 | 65.4 | 87.9 |
| chr7  | Bcl3          | Exon2     | Y | 20394845  | 20395012  | 1  | 59.5 | 83.1 | 61.1 | 83.4 |
| chr15 | Hdac7         | Exon12    | Y | 97633114  | 97633247  | 1  | 50.0 | 81.6 | 50.5 | 72.5 |
| chr2  | Acvr1c        | Intron8   | Y | 58168435  | 58210018  | 7  | 4.0  | 30.0 | 13.2 | 35.0 |
| chr11 | Slc16a11      | Exon3     | Y | 70028786  | 70029553  | 4  | 58.4 | 81.9 | 63.1 | 84.8 |
| chr7  | Tmc5          | Intron1   | Y | 125741059 | 125743697 | 2  | 4.5  | 59.2 | 23.1 | 44.9 |
| chr2  | Myo3a         | Intron13  | Y | 22255339  | 22261740  | 3  | 14.8 | 43.3 | 6.6  | 28.2 |
| chr14 | Opn4          | LastExon  | Y | 35403804  | 35404516  | 3  | 51.3 | 75.3 | 53.9 | 75.5 |
| chr15 | Trio          | Exon45    | Y | 27785820  | 27785989  | 1  | 48.6 | 68.1 | 46.8 | 68.4 |
| chr2  | Lsm14b        | Intron1   | Y | 179760018 | 179761339 | 5  | 54.2 | 76.7 | 19.4 | 40.6 |
| chr19 | Pdzd7         | Intron15  | Y | 45115194  | 45119907  | 1  | 63.3 | 84.3 | 64.2 | 85.1 |
| chr8  | Klf2          | 3-UTR     | Y | 74844819  | 74845553  | 1  | 46.8 | 73.0 | 47.2 | 68.0 |
| chr17 | Ntn3          | Exon2     | Y | 24344338  | 24344388  | 1  | 68.2 | 84.6 | 66.7 | 87.5 |
| chr17 | Gm7325        | LastExon  | Y | 45737916  | 45738634  | 3  | 27.4 | 45.2 | 18.3 | 39.0 |
| chr5  | Tbx3          | LastExon  | Y | 120132640 | 120134610 | 3  | 36.7 | 60.3 | 27.6 | 48.2 |

|       |               |           |   |           |           |    |      |      |      |      |
|-------|---------------|-----------|---|-----------|-----------|----|------|------|------|------|
| chr6  | Dctn1         | Intron5   | Y | 83133951  | 83136421  | 3  | 25.9 | 43.8 | 23.6 | 44.1 |
| chr9  | Icam5         | LastExon  | Y | 20843082  | 20843480  | 2  | 29.4 | 61.7 | 21.5 | 41.8 |
| chr17 | Tap1          | Intron1   | Y | 34325351  | 34326122  | 1  | 39.2 | 56.6 | 36.7 | 57.0 |
| chr6  | Tfpi2         | Intron4   | Y | 3918051   | 3918236   | 1  | 27.1 | 49.6 | 34.4 | 54.6 |
| chr7  | Dmpk          | Exon13    | Y | 19677557  | 19677603  | 1  | 42.1 | 77.5 | 47.9 | 67.8 |
| chr4  | Ahdc1         | Intron2   | Y | 132568203 | 132610927 | 18 | 58.3 | 90.6 | 17.4 | 37.3 |
| chr13 | Irx4          | Intron1   | Y | 73398325  | 73402295  | 13 | 26.4 | 44.9 | 18.6 | 38.3 |
| chr11 | Plekhh3       | Exon3     | Y | 101025973 | 101026105 | 1  | 70.5 | 93.5 | 71.6 | 91.2 |
| chr7  | B4galnt4      | Intron1   | Y | 148247324 | 148249735 | 3  | 54.8 | 80.3 | 27.5 | 47.1 |
| chr3  | Sema4a        | LastExon  | Y | 88239884  | 88241174  | 4  | 38.3 | 74.3 | 51.7 | 71.2 |
| chr10 | Abca7         | Exon13    | Y | 79465576  | 79465797  | 1  | 55.9 | 79.9 | 61.8 | 81.3 |
| chr11 | Shroom1       | Intron1   | Y | 53270844  | 53276724  | 4  | 40.2 | 56.4 | 8.3  | 27.8 |
| chr11 | Tmem88        | LastExon  | Y | 69210018  | 69211383  | 3  | 35.9 | 56.3 | 34.9 | 54.4 |
| chr2  | Mir219-2      | Downstre: | Y | 29700151  | 29701150  | 2  | 53.5 | 82.0 | 61.5 | 81.0 |
| chr14 | Slc7a7        | Intron11  | Y | 55035608  | 55036493  | 2  | 63.0 | 79.9 | 54.2 | 73.6 |
| chr7  | Dock1         | Intron27  | Y | 142067999 | 142182204 | 9  | 43.0 | 67.5 | 22.5 | 41.8 |
| chr11 | Kdm6b         | Downstre: | Y | 69211020  | 69212019  | 5  | 31.6 | 56.3 | 28.6 | 47.8 |
| chr14 | Scara5        | Exon3     | Y | 66349358  | 66350032  | 3  | 40.9 | 56.8 | 50.2 | 69.3 |
| chr4  | Ephb2         | Intron13  | Y | 136252070 | 136326870 | 4  | 15.0 | 79.6 | 40.9 | 60.0 |
| chr11 | Myo1d         | Intron6   | Y | 80415309  | 80451375  | 2  | 45.1 | 66.5 | 45.7 | 64.8 |
| chr2  | Hoxd4         | Intron2   | Y | 74560689  | 74561388  | 1  | 39.3 | 84.7 | 55.6 | 74.6 |
| chr2  | Hoxd4         | Exon2     | Y | 74561389  | 74561424  | 1  | 39.3 | 84.7 | 55.6 | 74.6 |
| chr2  | Urm1          | Downstre: | Y | 29700517  | 29701516  | 4  | 53.5 | 75.9 | 46.6 | 65.3 |
| chr11 | Tmc8          | Intron3   | Y | 117644858 | 117645084 | 1  | 17.1 | 39.9 | 21.2 | 39.9 |
| chr5  | Stx1a         | Intron6   | Y | 135518088 | 135518462 | 1  | 38.1 | 63.0 | 29.1 | 47.6 |
| chr11 | Hand1         | Intron1   | Y | 57643209  | 57644745  | 2  | 37.2 | 61.8 | 39.5 | 58.0 |
| chr5  | Atraid        | LastExon  | Y | 31356636  | 31356996  | 2  | 4.9  | 25.1 | 5.7  | 24.0 |
| chr5  | Atraid        | 3-UTR     | Y | 31356741  | 31356996  | 2  | 4.9  | 25.1 | 5.7  | 24.0 |
| chr8  | Ssbp4         | LastExon  | Y | 73121389  | 73121667  | 2  | 71.8 | 88.0 | 63.8 | 82.1 |
| chr8  | Ssbp4         | 3-UTR     | Y | 73121389  | 73121637  | 2  | 71.8 | 88.0 | 63.8 | 82.1 |
| chr11 | Lsm1          | Downstre: | Y | 69210174  | 69211173  | 1  | 36.5 | 56.3 | 34.5 | 52.7 |
| chr11 | Tmem88        | 3-UTR     | Y | 69210018  | 69211113  | 2  | 36.5 | 56.3 | 34.5 | 52.7 |
| chr6  | Bcl2l14       | Downstre: | Y | 134388743 | 134389742 | 2  | 58.6 | 77.0 | 47.4 | 65.5 |
| chr16 | Gp1bb         | LastExon  | Y | 18620412  | 18621425  | 6  | 32.1 | 95.5 | 16.7 | 34.8 |
| chr11 | Socs3         | LastExon  | Y | 117827401 | 117829632 | 5  | 28.7 | 58.5 | 26.1 | 44.0 |
| chr17 | Caskin1       | Intron18  | Y | 24642966  | 24643467  | 1  | 62.2 | 77.5 | 46.7 | 64.5 |
| chr10 | Nfic          | Exon3     | Y | 80870300  | 80870424  | 1  | 11.3 | 32.8 | 16.9 | 34.5 |
| chr5  | Fbrsl1        | Intron1   | Y | 110792899 | 110799968 | 1  | 15.0 | 33.3 | 0.0  | 17.4 |
| chr6  | Lpar5         | LastExon  | Y | 125031155 | 125032490 | 6  | 41.0 | 65.7 | 35.9 | 53.2 |
| chr11 | Nags          | Intron4   | Y | 102008859 | 102009123 | 1  | 10.6 | 67.2 | 35.5 | 52.8 |
| chr9  | Nrgn          | Intron2   | Y | 37353303  | 37353532  | 1  | 23.5 | 48.8 | 28.2 | 45.5 |
| chr2  | Hoxd4         | Intron3   | Y | 74561425  | 74563519  | 5  | 48.7 | 71.6 | 50.2 | 67.4 |
| chr2  | Fbn1          | Intron64  | Y | 125305009 | 125331175 | 2  | 2.1  | 30.1 | 4.1  | 21.3 |
| chr18 | Reep5         | Intron3   | Y | 34516885  | 34532058  | 1  | 35.3 | 81.8 | 43.3 | 60.4 |
| chr17 | Kremen2       | 3-UTR     | Y | 23878166  | 23878727  | 1  | 61.4 | 80.6 | 67.2 | 84.3 |
| chr15 | Vdr           | Intron3   | Y | 97689681  | 97697547  | 3  | 42.4 | 67.3 | 65.9 | 82.9 |
| chr9  | Rasl12        | Intron1   | Y | 65246475  | 65248725  | 1  | 12.7 | 42.3 | 19.9 | 36.9 |
| chr6  | 2700086A05Rik | Intron2   | Y | 52162487  | 52163031  | 3  | 0.6  | 31.8 | 2.7  | 19.6 |
| chr6  | 2700086A05Rik | 3-UTR     | Y | 52163032  | 52163596  | 3  | 0.7  | 36.5 | 2.5  | 19.5 |

|       |               |               |   |           |           |    |      |      |      |      |
|-------|---------------|---------------|---|-----------|-----------|----|------|------|------|------|
| chr11 | Camta2        | Exon2         | Y | 70484051  | 70484238  | 1  | 36.9 | 69.1 | 45.6 | 62.5 |
| chr7  | Igf1r         | Intron1       | Y | 75097839  | 75148695  | 9  | 57.2 | 75.2 | 31.6 | 48.3 |
| chr4  | Prdm16        | Intron15      | Y | 153850796 | 153902690 | 2  | 21.0 | 51.6 | 25.6 | 42.2 |
| chr4  | Lactbl1       | 3-UTR         | Y | 136194000 | 136194025 | 1  | 14.3 | 37.5 | 11.5 | 27.9 |
| chr4  | Bmp8b         | Intron1       | Y | 122782919 | 122791810 | 2  | 44.0 | 75.1 | 62.2 | 78.5 |
| chr11 | Cntnap1       | Exon4         | Y | 101039550 | 101039753 | 1  | 56.8 | 74.6 | 57.1 | 73.5 |
| chr11 | Nos2          | Intron2       | Y | 78735880  | 78742075  | 5  | 3.8  | 25.0 | 5.8  | 22.1 |
| chr6  | Magi1         | Intron22      | Y | 93765820  | 93893197  | 2  | 0.0  | 20.9 | 0.6  | 16.7 |
| chr6  | Magi1         | Intron21      | Y | 93765820  | 93863317  | 2  | 0.0  | 20.9 | 0.6  | 16.7 |
| chr9  | Ppm1m         | Intron9       | Y | 106100556 | 106101300 | 4  | 1.8  | 58.2 | 14.8 | 30.9 |
| chr13 | Nrn1          | Intron1       | Y | 36818726  | 36821975  | 4  | 18.9 | 36.2 | 21.0 | 36.9 |
| chr19 | Tmem132a      | Intron2       | Y | 10934246  | 10934613  | 1  | 53.3 | 72.7 | 66.7 | 82.6 |
| chr6  | AI854703      | Intron1       | Y | 48578569  | 48579126  | 1  | 29.2 | 50.0 | 31.9 | 47.8 |
| chr17 | H2-Q8         | Exon2         | Y | 35562516  | 35562791  | 1  | 24.9 | 53.5 | 27.4 | 43.3 |
| chr7  | Chst8         | LastExon      | Y | 35459487  | 35461263  | 6  | 11.7 | 50.0 | 19.3 | 35.0 |
| chr7  | Bloc1s3       | 3-UTR         | Y | 20091153  | 20092362  | 1  | 64.1 | 87.3 | 72.7 | 88.3 |
| chr2  | Foxa2         | LastExon      | Y | 147868614 | 147870560 | 8  | 4.6  | 47.1 | 12.4 | 27.8 |
| chr7  |               | 1-Sep Intron1 | Y | 134358359 | 134358462 | 2  | 27.4 | 57.6 | 41.0 | 56.4 |
| chr12 | At1l          | Intron2       | Y | 71008980  | 71026928  | 5  | 5.3  | 43.4 | 20.9 | 36.2 |
| chr16 | Liph          | Intron7       | Y | 21976408  | 21981408  | 1  | 23.1 | 43.8 | 29.3 | 44.7 |
| chr5  | Zfp316        | Intron6       | Y | 144026813 | 144031529 | 5  | 28.6 | 71.2 | 19.0 | 34.4 |
| chr11 | Cuedc1        | Intron1       | Y | 87912846  | 87983066  | 13 | 21.2 | 38.6 | 14.2 | 29.5 |
| chr9  | Barx2         | Intron3       | Y | 31666629  | 31720489  | 2  | 13.7 | 33.5 | 14.9 | 30.2 |
| chr14 | Zfhx2         | Intron9       | Y | 55694122  | 55710844  | 6  | 12.3 | 30.4 | 15.3 | 30.4 |
| chr7  | Kcnq1         | Intron11      | Y | 150447282 | 150544614 | 12 | 53.3 | 73.0 | 52.1 | 67.2 |
| chr11 | Pdlim4        | Intron6       | Y | 53877289  | 53882341  | 2  | 55.1 | 76.1 | 39.1 | 54.1 |
| chr8  | Tradd         | LastExon      | Y | 107782475 | 107783195 | 4  | 72.5 | 89.9 | 73.9 | 88.9 |
| chr7  | Arhgap33      | Exon20        | Y | 31319122  | 31319231  | 2  | 17.5 | 33.3 | 18.4 | 33.3 |
| chr4  | Gm12992       | Intron4       | Y | 131471437 | 131475682 | 6  | 32.9 | 51.4 | 35.0 | 49.7 |
| chr4  | Gm12992       | Intron2       | Y | 131471437 | 131475682 | 6  | 32.9 | 51.4 | 35.0 | 49.7 |
| chr17 | Npw           | Downstre:     | Y | 24793275  | 24794274  | 1  | 40.5 | 55.9 | 35.6 | 50.2 |
| chr17 | Kremen2       | LastExon      | Y | 23878166  | 23878938  | 2  | 61.4 | 80.6 | 63.7 | 78.2 |
| chr5  | Ankrd13a      | Intron8       | Y | 115246925 | 115247861 | 2  | 50.5 | 93.9 | 45.1 | 59.5 |
| chr1  | Phlda3        | Intron1       | Y | 137663472 | 137665054 | 1  | 15.6 | 49.4 | 18.9 | 33.3 |
| chr1  | Phlda3        | 3-UTR         | Y | 137663404 | 137665711 | 1  | 15.6 | 49.4 | 18.9 | 33.3 |
| chr2  | Gm17762       | Downstre:     | Y | 17952205  | 17953204  | 1  | 11.5 | 36.2 | 12.4 | 26.8 |
| chr17 | Tmem151b      | Intron2       | Y | 45684151  | 45686231  | 5  | 35.1 | 51.1 | 28.5 | 42.9 |
| chr7  | Myh14         | Intron28      | Y | 51893834  | 51894312  | 2  | 55.6 | 96.3 | 64.0 | 78.3 |
| chr12 | Cyp46a1       | Intron1       | Y | 109572775 | 109580532 | 3  | 31.2 | 50.8 | 31.6 | 45.9 |
| chr7  | Bcl3          | Intron2       | Y | 20394609  | 20394844  | 1  | 46.5 | 71.3 | 47.5 | 61.8 |
| chr19 | Entpd7        | LastExon      | Y | 43804188  | 43808343  | 2  | 55.8 | 76.1 | 61.9 | 76.1 |
| chr17 | Ccdc64b       | Intron2       | Y | 23799030  | 23802354  | 1  | 70.9 | 89.8 | 73.4 | 87.6 |
| chr3  | Nbea          | Intron17      | Y | 55527572  | 55590362  | 13 | 20.4 | 55.2 | 30.6 | 44.7 |
| chr7  | Atp4a         | Intron11      | Y | 31502903  | 31503997  | 1  | 47.1 | 63.2 | 37.1 | 51.1 |
| chr11 | Slc16a11      | Intron3       | Y | 70028601  | 70028785  | 1  | 67.5 | 87.4 | 70.1 | 84.1 |
| chr8  | B3gnt3        | Intron2       | Y | 74217799  | 74225616  | 4  | 0.9  | 35.6 | 16.7 | 30.6 |
| chr19 | Ltbp3         | Intron2       | Y | 5742563   | 5745439   | 2  | 50.0 | 69.9 | 46.6 | 60.5 |
| chr3  | 4931419H13Rik | Intron1       | Y | 54859359  | 54862196  | 3  | 16.7 | 33.9 | 4.8  | 18.5 |
| chr11 | Sfi1          | Intron31      | Y | 3087414   | 3088943   | 2  | 46.6 | 88.8 | 71.4 | 85.1 |

|       |               |           |   |           |           |    |      |      |      |      |
|-------|---------------|-----------|---|-----------|-----------|----|------|------|------|------|
| chr5  | Mnx1          | Intron1   | Y | 29800772  | 29801295  | 3  | 41.3 | 75.7 | 58.9 | 72.4 |
| chr4  | Cela2a        | Intron3   | Y | 141375043 | 141377239 | 1  | 58.8 | 75.7 | 75.9 | 89.5 |
| chr3  | Gria2         | Intron14  | Y | 80545121  | 80605566  | 6  | 21.3 | 37.4 | 16.2 | 29.7 |
| chr19 | Cyp26c1       | Intron2   | Y | 37761152  | 37761608  | 2  | 6.0  | 54.6 | 20.4 | 33.9 |
| chr12 | Mboat2        | Intron1   | Y | 25516640  | 25563055  | 4  | 7.6  | 25.4 | 4.5  | 18.0 |
| chr9  | Rbp1          | Intron1   | Y | 98325471  | 98325871  | 2  | 31.4 | 62.6 | 34.0 | 47.5 |
| chr6  | Plekha5       | Intron3   | Y | 140375077 | 140473385 | 2  | 48.2 | 67.2 | 42.0 | 55.4 |
| chr5  | Mnx1          | LastExon  | Y | 29800363  | 29800771  | 3  | 45.3 | 76.1 | 51.4 | 64.7 |
| chr4  | Prdm16        | Intron16  | Y | 153903041 | 154010831 | 13 | 30.0 | 47.5 | 19.8 | 33.0 |
| chr2  | Rapgef4       | Intron3   | Y | 71872177  | 71883158  | 2  | 25.9 | 84.8 | 68.8 | 81.9 |
| chr2  | Hoxd3         | Intron1   | Y | 74550374  | 74581984  | 32 | 27.7 | 48.4 | 21.2 | 34.3 |
| chr5  | Sirt4         | Exon2     | Y | 115930240 | 115930534 | 1  | 8.0  | 25.8 | 9.2  | 22.2 |
| chr7  | Zfp575        | Intron1   | Y | 25371158  | 25371672  | 2  | 63.4 | 81.8 | 66.5 | 79.3 |
| chr19 | Pdzd7         | Exon14    | Y | 45115053  | 45115193  | 1  | 42.5 | 61.8 | 50.0 | 62.8 |
| chr15 | Krt77         | Downstre: | Y | 101689287 | 101690286 | 2  | 7.3  | 28.7 | 11.1 | 23.8 |
| chr7  | Myipf         | Downstre: | Y | 134357802 | 134358801 | 4  | 16.4 | 43.0 | 33.8 | 46.5 |
| chr5  | Mlxipl        | Exon13    | Y | 135609864 | 135609991 | 1  | 0.4  | 17.9 | 2.4  | 15.0 |
| chr1  | Aff3          | Exon10    | Y | 38266398  | 38267492  | 4  | 47.0 | 68.1 | 54.8 | 67.4 |
| chr17 | Tnfrsf21      | Intron1   | Y | 43154042  | 43174543  | 7  | 49.6 | 85.0 | 30.4 | 42.9 |
| chr19 | Rps6ka4       | Intron15  | Y | 6913858   | 6913949   | 1  | 62.8 | 97.7 | 75.0 | 87.5 |
| chr4  | Foxo6         | 3-UTR     | Y | 119939683 | 119940521 | 4  | 24.7 | 41.8 | 29.8 | 42.3 |
| chr11 | Tmc8          | Intron9   | Y | 117648183 | 117651529 | 2  | 40.3 | 59.1 | 35.0 | 47.4 |
| chr6  | Rab11fip5     | Intron5   | Y | 85298986  | 85324091  | 2  | 70.8 | 86.3 | 34.0 | 46.3 |
| chr13 | Irx4          | Intron2   | Y | 73402428  | 73402905  | 2  | 22.4 | 62.3 | 46.9 | 59.2 |
| chr14 | Extl3         | Intron4   | Y | 65685648  | 65694420  | 2  | 49.0 | 64.5 | 59.8 | 72.1 |
| chr4  | Espn          | Intron6   | Y | 151503748 | 151504877 | 3  | 17.8 | 43.3 | 23.0 | 35.2 |
| chr9  | Barx2         | Intron2   | Y | 31661783  | 31666315  | 1  | 67.4 | 86.4 | 74.3 | 86.3 |
| chr1  | Glb1l         | Exon14    | Y | 75205631  | 75205797  | 1  | 6.2  | 24.6 | 6.9  | 18.9 |
| chr10 | D630037F22Rik | Intron11  | Y | 55809646  | 55843316  | 6  | 0.5  | 15.7 | 4.0  | 15.9 |
| chr2  | Itpka         | Exon2     | Y | 119575098 | 119575314 | 1  | 61.8 | 82.1 | 66.6 | 78.5 |
| chr11 | 4933422H20Rik | Exon2     | Y | 115302395 | 115303059 | 2  | 50.0 | 78.4 | 62.8 | 74.2 |
| chr1  | Ihh           | Intron1   | Y | 74993322  | 74994877  | 3  | 22.9 | 56.0 | 12.3 | 23.5 |
| chr15 | Galr3         | Downstre: | Y | 78873989  | 78874988  | 1  | 39.3 | 74.6 | 44.1 | 55.3 |
| chr15 | Pde1b         | Intron2   | Y | 103334015 | 103350379 | 3  | 58.0 | 73.9 | 36.6 | 47.9 |
| chr7  | Sptbn4        | Intron5   | Y | 28147488  | 28149089  | 2  | 4.3  | 33.8 | 36.0 | 47.2 |
| chr2  | Sp5           | LastExon  | Y | 70314081  | 70315783  | 8  | 3.5  | 34.2 | 2.0  | 13.2 |
| chr13 | Irx4          | Exon4     | Y | 73404952  | 73405280  | 2  | 24.2 | 61.6 | 40.0 | 51.1 |
| chr19 | Ccdc86        | Downstre: | Y | 11014971  | 11015970  | 5  | 1.3  | 21.1 | 9.8  | 20.8 |
| chr9  | Epor          | Exon2     | Y | 21764968  | 21765055  | 1  | 18.1 | 51.2 | 27.7 | 38.7 |
| chr6  | Zfp467        | LastExon  | Y | 48386612  | 48389356  | 8  | 70.7 | 90.6 | 76.0 | 87.0 |
| chr6  | Zfp467        | Intron1   | Y | 48377879  | 48391945  | 9  | 70.7 | 90.6 | 76.0 | 87.0 |
| chr9  | Barx2         | Exon2     | Y | 31666316  | 31666628  | 2  | 13.7 | 37.3 | 20.2 | 31.1 |
| chr7  | Bloc1s3       | LastExon  | Y | 20091153  | 20092959  | 5  | 32.4 | 50.5 | 18.2 | 29.1 |
| chr8  | Cacna1a       | Intron37  | Y | 87138691  | 87141690  | 3  | 41.4 | 56.5 | 44.6 | 55.3 |
| chr6  | Hoxa7         | Downstre: | Y | 52164623  | 52165622  | 2  | 12.8 | 34.6 | 14.9 | 25.7 |
| chr6  | Hoxa7         | 3-UTR     | Y | 52165623  | 52165715  | 1  | 12.8 | 34.6 | 14.9 | 25.7 |
| chr8  | 6430548M08Rik | Intron12  | Y | 122684313 | 122685114 | 2  | 71.8 | 88.0 | 77.9 | 88.6 |
| chr3  | Polr3c        | Exon9     | Y | 96523384  | 96523488  | 1  | 63.2 | 87.0 | 70.7 | 81.2 |
| chr3  | Ccdc109b      | Intron7   | Y | 129637619 | 129672867 | 5  | 6.7  | 64.5 | 37.9 | 48.3 |

|       |               |          |   |           |           |    |      |      |      |      |
|-------|---------------|----------|---|-----------|-----------|----|------|------|------|------|
| chr5  | Drc1          | Intron3  | Y | 30644973  | 30647772  | 1  | 6.0  | 25.1 | 3.2  | 13.5 |
| chr11 | Fam171a2      | Intron1  | Y | 102300224 | 102300745 | 1  | 53.3 | 73.0 | 49.3 | 59.7 |
| chr2  | St6galnac6    | Intron1  | Y | 32455357  | 32467743  | 11 | 11.8 | 37.5 | 10.5 | 20.8 |
| chr6  | Lrrc23        | LastExon | Y | 124719881 | 124720181 | 2  | 26.2 | 50.0 | 18.6 | 28.7 |
| chr6  | Lrrc23        | 3-UTR    | Y | 124719881 | 124720619 | 2  | 26.2 | 50.0 | 18.6 | 28.7 |
| chr9  | Igdcc3        | Intron2  | Y | 64992369  | 65025201  | 6  | 62.3 | 83.1 | 20.6 | 30.8 |
| chr4  | Agrn          | Intron34 | Y | 155559245 | 155569352 | 2  | 53.3 | 70.8 | 60.8 | 70.7 |
| chr17 | Haao          | Intron9  | Y | 84242615  | 84245976  | 1  | 74.3 | 90.1 | 79.7 | 89.6 |
| chr11 | Abi3          | LastExon | Y | 95691386  | 95694190  | 8  | 45.4 | 79.8 | 17.0 | 26.7 |
| chr11 | Abi3          | 3-UTR    | Y | 95691386  | 95694026  | 8  | 45.4 | 79.8 | 17.0 | 26.7 |
| chr7  | Dgat2         | Intron7  | Y | 106318337 | 106330901 | 2  | 3.8  | 24.3 | 15.2 | 24.9 |
| chr6  | Zfp467        | 3-UTR    | Y | 48386612  | 48389282  | 7  | 70.7 | 90.6 | 76.4 | 85.9 |
| chr15 | Apobec3       | Intron1  | Y | 79723000  | 79725840  | 2  | 11.5 | 45.1 | 16.5 | 26.0 |
| chr14 | Zmiz1         | Intron6  | Y | 26401160  | 26455358  | 11 | 13.8 | 28.9 | 4.7  | 14.3 |
| chr12 | Hif1a         | Intron1  | Y | 75009312  | 75027543  | 4  | 3.9  | 19.5 | 0.8  | 10.3 |
| chr11 | Phf23         | Exon2    | Y | 69811248  | 69811340  | 1  | 43.8 | 62.6 | 45.1 | 54.5 |
| chr18 | Gm9926        | 3-UTR    | Y | 66666928  | 66671391  | 2  | 25.4 | 49.7 | 39.9 | 49.3 |
| chr3  | Gm21949       | Intron5  | Y | 68299180  | 68400071  | 7  | 11.1 | 71.4 | 13.8 | 23.2 |
| chr3  | Schip1        | Intron2  | Y | 68299180  | 68400071  | 7  | 11.1 | 71.4 | 13.8 | 23.2 |
| chr15 | Cacnb3        | Intron1  | Y | 98462952  | 98469918  | 12 | 4.5  | 22.0 | 11.2 | 20.5 |
| chr19 | Entpd7        | 3-UTR    | Y | 43804426  | 43808343  | 1  | 51.8 | 73.8 | 64.0 | 73.1 |
| chr11 | E130012A19Rik | 3-UTR    | Y | 97488701  | 97489485  | 2  | 10.3 | 26.4 | 12.9 | 21.9 |
| chr1  | Psen2         | Intron10 | Y | 182175889 | 182186353 | 5  | 28.1 | 44.2 | 19.2 | 27.9 |
| chr9  | Phldb1        | Intron21 | Y | 44536184  | 44543207  | 9  | 21.0 | 44.4 | 5.3  | 13.9 |
| chr10 | Mmp11         | Intron7  | Y | 75391255  | 75395078  | 2  | 5.2  | 29.6 | 6.4  | 15.0 |
| chr7  | Fam53b        | Intron4  | Y | 139971069 | 140004748 | 6  | 14.3 | 65.2 | 39.2 | 47.8 |
| chr17 | Arhgdig       | Exon4    | Y | 26337136  | 26337315  | 1  | 76.5 | 91.7 | 80.8 | 89.3 |
| chr11 | Myo1d         | Intron1  | Y | 80297885  | 80370935  | 1  | 75.9 | 92.6 | 68.9 | 77.4 |
| chr11 | Ebf1          | Intron6  | Y | 44456972  | 44682593  | 4  | 45.0 | 60.4 | 38.9 | 47.4 |
| chr10 | Foxo3         | Intron2  | Y | 41917708  | 41994621  | 3  | 1.7  | 16.8 | 7.4  | 15.8 |
| chr7  | Ryr1          | Intron57 | Y | 29855716  | 29856587  | 2  | 30.6 | 53.5 | 31.2 | 39.6 |
| chr8  | Ctxn1         | 3-UTR    | Y | 4257646   | 4258380   | 2  | 19.3 | 66.1 | 17.2 | 25.6 |
| chr16 | Tiam1         | Intron27 | Y | 89956353  | 89974828  | 6  | 14.8 | 45.8 | 15.7 | 24.0 |
| chr5  | Setd1b        | 3-UTR    | Y | 123616016 | 123618639 | 2  | 71.2 | 88.6 | 79.8 | 88.0 |
| chr9  | Mon1a         | Intron3  | Y | 107802847 | 107803525 | 1  | 30.3 | 54.5 | 45.4 | 53.5 |
| chr7  | Bnip3         | Intron5  | Y | 146090512 | 146101045 | 2  | 0.0  | 26.4 | 1.9  | 10.0 |
| chr7  | Prkcdpb       | Intron1  | Y | 112629734 | 112630289 | 2  | 13.0 | 34.7 | 8.9  | 17.0 |
| chr4  | Runx3         | Intron5  | Y | 134727174 | 134731214 | 1  | 35.6 | 67.9 | 49.5 | 57.4 |
| chr11 | Hcrt          | Intron1  | Y | 100623480 | 100624134 | 1  | 6.7  | 36.5 | 11.6 | 19.4 |
| chr4  | Ptch2         | Intron1  | Y | 116769033 | 116769451 | 1  | 0.0  | 16.2 | 4.7  | 12.5 |
| chr10 | Hmga2         | Intron2  | Y | 119811757 | 119899719 | 6  | 21.6 | 64.8 | 45.8 | 53.6 |
| chr3  | Lmna          | Intron7  | Y | 88289070  | 88290125  | 1  | 57.1 | 73.3 | 67.3 | 75.0 |
| chr1  | Obsl1         | Intron5  | Y | 75484638  | 75485163  | 2  | 3.2  | 70.0 | 30.7 | 38.3 |
| chr4  | Nkain1        | Intron1  | Y | 130125913 | 130160561 | 5  | 0.0  | 16.9 | 7.7  | 15.3 |
| chr11 | Myh3          | Intron7  | Y | 66897361  | 66897576  | 1  | 48.5 | 64.6 | 55.0 | 62.5 |
| chr3  | Ankrd35       | Exon9    | Y | 96487106  | 96489097  | 3  | 14.4 | 35.3 | 17.8 | 25.4 |
| chr16 | Liph          | Intron6  | Y | 21974221  | 21976305  | 1  | 51.1 | 70.8 | 52.1 | 59.5 |
| chr11 | Gfap          | Intron5  | Y | 102754901 | 102755691 | 2  | 58.5 | 96.2 | 52.8 | 60.1 |
| chr8  | Pard6a        | Intron1  | Y | 108225218 | 108226073 | 5  | 2.5  | 19.9 | 5.8  | 13.1 |

|       |               |           |   |           |           |    |      |      |      |      |
|-------|---------------|-----------|---|-----------|-----------|----|------|------|------|------|
| chr5  | Tmub1         | LastExon  | Y | 23951281  | 23952091  | 4  | 42.2 | 57.8 | 52.3 | 59.6 |
| chr12 | Rtn1          | Intron6   | Y | 73324527  | 73404643  | 8  | 0.5  | 22.3 | 23.2 | 30.4 |
| chr16 | Sdf2l1        | Intron1   | Y | 17130882  | 17131689  | 1  | 3.4  | 18.8 | 3.7  | 10.9 |
| chr8  | Klhl36        | Exon2     | Y | 122393522 | 122394592 | 5  | 62.1 | 86.5 | 79.6 | 86.7 |
| chr4  | Lactbl1       | Downstre: | Y | 136194026 | 136195025 | 2  | 40.4 | 59.5 | 22.6 | 29.7 |
| chr13 | Cd83          | Intron2   | Y | 43880837  | 43892901  | 2  | 37.0 | 56.6 | 40.6 | 47.6 |
| chr7  | Sergef        | Intron1   | Y | 53698906  | 53771037  | 2  | 69.8 | 87.8 | 79.0 | 86.1 |
| chr7  | Lrrc4b        | LastExon  | Y | 51716379  | 51718714  | 10 | 1.3  | 39.4 | 31.3 | 38.3 |
| chr11 | 4933439C10Rik | Intron1   | Y | 59320389  | 59320692  | 1  | 16.8 | 32.8 | 10.9 | 17.9 |
| chr9  | Klhl31        | Intron2   | Y | 77498983  | 77502933  | 2  | 36.4 | 60.5 | 22.4 | 29.3 |
| chr14 | Slain1        | Intron5   | Y | 104094541 | 104101733 | 1  | 78.4 | 97.8 | 84.3 | 91.0 |
| chr15 | Syng1         | Intron1   | Y | 79921923  | 79940873  | 6  | 38.9 | 54.9 | 34.7 | 41.5 |
| chr7  | Rgma          | Intron1   | Y | 80520775  | 80536266  | 8  | 8.8  | 26.3 | 5.2  | 11.9 |
| chr10 | H2afy2        | Intron8   | Y | 61220703  | 61246530  | 6  | 4.5  | 32.4 | 2.6  | 9.1  |
| chr9  | Rassf1        | Intron1   | Y | 107454178 | 107456468 | 4  | 4.6  | 27.8 | 13.5 | 20.1 |
| chr7  | Wnt11         | Intron1   | Y | 105987701 | 105994883 | 4  | 12.5 | 27.9 | 32.1 | 38.7 |
| chr7  | Art1          | Exon2     | Y | 109255181 | 109255946 | 3  | 42.4 | 67.8 | 24.5 | 31.0 |
| chr17 | H2-Q7         | Exon2     | Y | 35576854  | 35577129  | 1  | 42.7 | 61.5 | 50.5 | 57.0 |
| chr17 | H2-Q9         | Exon2     | Y | 35576854  | 35577129  | 1  | 42.7 | 61.5 | 50.5 | 57.0 |
| chr3  | Rhoc          | Intron1   | Y | 104592002 | 104594806 | 4  | 26.1 | 48.2 | 11.9 | 18.3 |
| chr9  | Eomes         | Intron1   | Y | 118388665 | 118389584 | 2  | 8.3  | 23.7 | 8.4  | 14.9 |
| chr6  | Slc41a3       | Intron1   | Y | 90555003  | 90561872  | 3  | 8.6  | 24.3 | 7.8  | 14.2 |
| chr4  | Draxin        | LastExon  | Y | 147472546 | 147476691 | 3  | 7.1  | 24.3 | 2.3  | 8.7  |
| chr17 | Map4k3        | Intron33  | Y | 81080266  | 81127133  | 5  | 9.4  | 52.4 | 16.5 | 22.8 |
| chr17 | Tulp1         | LastExon  | Y | 28488464  | 28488947  | 4  | 0.0  | 24.3 | 13.2 | 19.5 |
| chr7  | Mir291a       | Downstre: | Y | 3219002   | 3220001   | 4  | 17.5 | 34.1 | 19.9 | 26.1 |
| chr2  | Smox          | Intron1   | Y | 131317773 | 131337719 | 5  | 18.2 | 41.5 | 4.3  | 10.6 |
| chr3  | Tnik          | Exon11    | Y | 28476291  | 28476495  | 1  | 27.4 | 61.5 | 38.9 | 45.1 |
| chr8  | Zfpm1         | LastExon  | Y | 124859332 | 124861147 | 10 | 55.8 | 85.8 | 34.2 | 40.4 |
| chr11 | Prkca         | Intron12  | Y | 107875696 | 107915288 | 3  | 18.8 | 44.6 | 36.2 | 42.4 |
| chr7  | Lmo1          | Intron3   | Y | 116287184 | 116313496 | 4  | 8.7  | 38.1 | 13.4 | 19.3 |
| chr2  | Rbpjl         | LastExon  | Y | 164239870 | 164240948 | 2  | 58.1 | 92.2 | 55.4 | 61.3 |
| chr15 | Csnk1e        | Intron9   | Y | 79260596  | 79269201  | 2  | 49.8 | 66.8 | 50.8 | 56.7 |
| chr10 | Csrp2         | Intron1   | Y | 110357311 | 110369010 | 4  | 10.4 | 34.1 | 9.7  | 15.5 |
| chr10 | Abca7         | Intron14  | Y | 79465798  | 79465876  | 1  | 45.2 | 64.8 | 66.2 | 72.0 |
| chr7  | Cd37          | Intron3   | Y | 52491014  | 52491484  | 1  | 20.3 | 43.2 | 26.4 | 32.1 |
| chr1  | Tmem198       | Exon2     | Y | 75479144  | 75479719  | 3  | 48.0 | 68.2 | 45.8 | 51.4 |
| chr7  | Gm10046       | Intron1   | Y | 28550803  | 28554258  | 2  | 22.5 | 56.7 | 46.2 | 51.8 |
| chr16 | Ece2          | Exon2     | Y | 20630425  | 20630511  | 1  | 13.1 | 28.2 | 17.2 | 22.6 |
| chr14 | Rem2          | Exon3     | Y | 55097791  | 55097998  | 1  | 65.3 | 87.0 | 85.0 | 90.4 |
| chr10 | Gm10754       | Intron1   | Y | 97145293  | 97215139  | 7  | 75.8 | 91.7 | 83.1 | 88.5 |
| chr11 | Hoxb2         | 3-UTR     | Y | 96214944  | 96215328  | 1  | 27.5 | 49.1 | 49.4 | 54.7 |
| chr9  | Ep3           | Intron2   | Y | 21764293  | 21764967  | 1  | 26.7 | 62.5 | 46.6 | 51.9 |
| chr12 | Bcl11b        | Intron2   | Y | 109204098 | 109227674 | 7  | 1.6  | 40.5 | 29.3 | 34.5 |
| chr14 | Abcc4         | Intron28  | Y | 119053597 | 119067568 | 2  | 49.0 | 73.7 | 64.2 | 69.3 |
| chr5  | Rilpl1        | Intron6   | Y | 124971411 | 124980683 | 3  | 36.4 | 89.3 | 37.4 | 42.4 |
| chr8  | Nfix          | Intron9   | Y | 87296215  | 87323896  | 19 | 19.2 | 50.6 | 6.8  | 11.8 |
| chr7  | Trpm1         | LastExon  | Y | 71412846  | 71414645  | 5  | 34.3 | 77.2 | 31.4 | 36.4 |
| chr11 | Rai1          | Intron2   | Y | 59953873  | 59998597  | 16 | 39.5 | 55.0 | 19.9 | 24.9 |



|       |               |           |   |           |           |    |      |      |      |      |
|-------|---------------|-----------|---|-----------|-----------|----|------|------|------|------|
| chr2  | Prdm11        | Intron6   | Y | 92854047  | 92886135  | 14 | 0.0  | 37.9 | 12.3 | 17.3 |
| chr5  | Card11        | Intron13  | Y | 141366024 | 141366939 | 2  | 66.9 | 84.1 | 71.4 | 76.1 |
| chr11 | Col23a1       | Intron1   | Y | 51103890  | 51130397  | 3  | 5.2  | 24.5 | 6.4  | 11.1 |
| chr9  | Mras          | Intron5   | Y | 99312022  | 99336728  | 3  | 69.0 | 86.6 | 27.0 | 31.6 |
| chr3  | Gipc2         | Downstre: | Y | 151755805 | 151756804 | 1  | 51.9 | 70.0 | 58.5 | 63.1 |
| chr8  | Kbtbd11       | LastExon  | Y | 15026651  | 15033332  | 12 | 20.0 | 59.1 | 7.7  | 12.3 |
| chr7  | Kcnj11        | Intron1   | Y | 53355023  | 53355997  | 4  | 40.9 | 61.9 | 31.1 | 35.7 |
| chr2  | Gata3         | Intron4   | Y | 9796553   | 9798978   | 3  | 16.1 | 40.4 | 19.5 | 24.0 |
| chr5  | Mnx1          | 3-UTR     | Y | 29800363  | 29800408  | 1  | 57.4 | 83.3 | 60.7 | 65.2 |
| chr4  | Epha10        | Intron8   | Y | 124583277 | 124589250 | 4  | 3.0  | 32.5 | 24.0 | 28.5 |
| chr17 | Cpne5         | Intron20  | Y | 29363179  | 29374557  | 2  | 23.5 | 52.6 | 17.6 | 22.0 |
| chr7  | Sprn          | LastExon  | Y | 147336527 | 147339571 | 4  | 6.3  | 30.9 | 19.5 | 23.8 |
| chr19 | Peli3         | Intron6   | Y | 4941913   | 4942937   | 4  | 50.0 | 71.4 | 14.1 | 18.5 |
| chr1  | Neurl3        | Intron2   | Y | 36325555  | 36326057  | 3  | 72.2 | 94.9 | 80.7 | 84.7 |
| chr2  | Necab3        | Intron12  | Y | 154382818 | 154384473 | 2  | 9.8  | 29.3 | 14.6 | 18.6 |
| chr6  | Prrt3         | LastExon  | Y | 113444089 | 113446059 | 7  | 17.4 | 34.5 | 16.4 | 20.5 |
| chr3  | 1110032F04Rik | 3-UTR     | Y | 68674374  | 68676085  | 3  | 2.1  | 18.9 | 16.3 | 20.3 |
| chr17 | Cbs           | Intron16  | Y | 31770100  | 31774027  | 5  | 12.8 | 37.1 | 3.4  | 7.3  |
| chr19 | Add3          | Intron1   | Y | 53217580  | 53291290  | 6  | 23.3 | 43.1 | 14.4 | 18.3 |
| chr12 | Rps6kl1       | Intron10  | Y | 86490859  | 86492112  | 3  | 13.8 | 29.9 | 6.9  | 10.7 |
| chr11 | Kcnip1        | Intron7   | Y | 33545628  | 33892748  | 11 | 2.2  | 30.7 | 28.2 | 32.0 |
| chr7  | Mir292        | Downstre: | Y | 3219272   | 3220271   | 2  | 23.8 | 38.9 | 26.4 | 30.2 |
| chr5  | Sgsm1         | Intron23  | Y | 113717920 | 113739567 | 8  | 8.1  | 46.4 | 35.8 | 39.6 |
| chr5  | Sgsm1         | Intron16  | Y | 113717920 | 113739567 | 8  | 8.1  | 46.4 | 35.8 | 39.6 |
| chr7  | Zfp94         | Intron5   | Y | 25099431  | 25101537  | 3  | 19.7 | 40.3 | 18.4 | 22.2 |
| chr1  | Syt2          | Intron2   | Y | 136560576 | 136637411 | 8  | 1.1  | 31.0 | 26.0 | 29.8 |
| chr3  | Celsr2        | Intron33  | Y | 108210316 | 108215102 | 1  | 72.7 | 89.5 | 73.2 | 76.9 |
| chr1  | Slc45a3       | Intron1   | Y | 133859630 | 133873294 | 6  | 23.3 | 61.7 | 8.0  | 11.8 |
| chr9  | Zfp872        | Intron1   | Y | 21992676  | 22001510  | 2  | 9.6  | 30.8 | 11.8 | 15.5 |
| chr5  | Pdx1          | Intron1   | Y | 148082224 | 148085955 | 2  | 10.5 | 26.2 | 23.1 | 26.8 |
| chr5  | Kcnk3         | LastExon  | Y | 30924264  | 30927643  | 6  | 15.8 | 32.5 | 12.3 | 15.8 |
| chr4  | Ror1          | Intron1   | Y | 99768915  | 99975484  | 3  | 5.2  | 20.7 | 2.6  | 6.1  |
| chr1  | Pam           | Intron24  | Y | 99872483  | 99873433  | 1  | 3.8  | 25.5 | 2.5  | 6.0  |
| chr7  | B4galnt4      | Intron16  | Y | 148256841 | 148256940 | 1  | 29.9 | 49.3 | 24.4 | 27.9 |
| chr7  | Tbc1d17       | Downstre: | Y | 52095146  | 52096145  | 4  | 1.6  | 63.7 | 22.7 | 26.1 |
| chr1  | Kcnj10        | LastExon  | Y | 174299052 | 174304216 | 6  | 40.7 | 66.5 | 61.2 | 64.6 |
| chr7  | Tfpt          | Intron5   | Y | 3580689   | 3581153   | 2  | 2.3  | 24.6 | 24.5 | 27.8 |
| chr6  | Hoxa7         | LastExon  | Y | 52165623  | 52166029  | 3  | 11.2 | 28.2 | 12.9 | 16.2 |
| chr11 | Rasl10a       | LastExon  | Y | 4959801   | 4960386   | 2  | 11.0 | 31.5 | 23.0 | 26.3 |
| chr5  | Stag3         | Intron1   | Y | 138721883 | 138723092 | 2  | 56.6 | 88.0 | 61.1 | 64.3 |
| chr19 | Sgms1         | Intron5   | Y | 32234854  | 32297998  | 3  | 1.2  | 22.4 | 2.4  | 5.6  |
| chr7  | Taf10         | Intron3   | Y | 112892007 | 112892343 | 3  | 7.4  | 29.8 | 20.2 | 23.4 |
| chr7  | Ilk           | Downstre: | Y | 112891440 | 112892439 | 3  | 7.4  | 29.8 | 20.2 | 23.4 |
| chr11 | Mmp28         | Intron7   | Y | 83265242  | 83276249  | 2  | 3.2  | 59.0 | 19.1 | 22.2 |
| chr15 | Trps1         | Intron5   | Y | 50678489  | 50721149  | 9  | 0.1  | 18.8 | 6.1  | 9.2  |
| chr8  | Ctxn1         | LastExon  | Y | 4257646   | 4258647   | 4  | 19.3 | 66.1 | 6.0  | 9.1  |
| chr3  | Rarres1       | Intron5   | Y | 67299734  | 67319082  | 3  | 27.9 | 49.4 | 30.3 | 33.3 |
| chr7  | Fbl           | Intron8   | Y | 28964063  | 28964149  | 1  | 31.8 | 51.3 | 52.1 | 55.0 |
| chr7  | Fbl           | Exon7     | Y | 28963917  | 28964062  | 1  | 31.8 | 51.3 | 52.1 | 55.0 |

|       |               |           |   |           |           |    |      |      |      |      |
|-------|---------------|-----------|---|-----------|-----------|----|------|------|------|------|
| chr4  | Epb4.1        | Intron20  | Y | 131563354 | 131626542 | 8  | 14.1 | 33.7 | 7.0  | 10.0 |
| chr4  | A3galt2       | LastExon  | Y | 128444229 | 128446542 | 4  | 64.3 | 81.7 | 81.8 | 84.6 |
| chr19 | Men1          | LastExon  | Y | 6339687   | 6340894   | 5  | 10.4 | 28.8 | 30.8 | 33.6 |
| chr7  | Il4i1         | LastExon  | Y | 52094953  | 52096179  | 5  | 1.6  | 63.7 | 18.3 | 21.0 |
| chr7  | Nup62-il4i1   | LastExon  | Y | 52094953  | 52096173  | 5  | 1.6  | 63.7 | 18.3 | 21.0 |
| chr4  | Espn          | Intron8   | Y | 151505404 | 151507032 | 6  | 3.6  | 20.2 | 6.1  | 8.8  |
| chr9  | 2600006L11Rik | Intron1   | Y | 63928644  | 63934090  | 4  | 13.9 | 29.0 | 19.0 | 21.7 |
| chr7  | Rasip1        | Intron5   | Y | 52888260  | 52890186  | 1  | 74.3 | 90.6 | 86.9 | 89.6 |
| chr19 | Neurl1a       | Exon2     | Y | 47314840  | 47315161  | 2  | 41.3 | 58.2 | 45.7 | 48.3 |
| chr8  | Lonrf1        | Intron11  | Y | 37299162  | 37311620  | 5  | 3.7  | 25.4 | 1.4  | 4.0  |
| chr4  | Fam110b       | LastExon  | Y | 5725416   | 5727091   | 5  | 12.4 | 59.4 | 46.1 | 48.7 |
| chr19 | Syt7          | Intron3   | Y | 10492533  | 10500788  | 7  | 10.8 | 28.5 | 23.0 | 25.6 |
| chr4  | Nmnat1        | Intron4   | Y | 148848705 | 148859217 | 5  | 32.8 | 70.1 | 58.5 | 61.1 |
| chr8  | 4933416M07Rik | Intron1   | Y | 28253834  | 28253950  | 2  | 25.8 | 85.9 | 89.0 | 91.4 |
| chr6  | Hoxa9         | LastExon  | Y | 52173096  | 52174481  | 2  | 3.6  | 21.6 | 12.9 | 15.3 |
| chr9  | Twf2          | Intron1   | Y | 106105616 | 106109219 | 2  | 0.3  | 27.6 | 11.3 | 13.7 |
| chr7  | Chst8         | Intron3   | Y | 35533297  | 35597364  | 8  | 0.6  | 76.0 | 33.8 | 36.2 |
| chr14 | Xkr6          | Intron1   | Y | 64226122  | 64417043  | 8  | 43.0 | 62.6 | 28.4 | 30.7 |
| chr7  | Mir291b       | Downstre: | Y | 3219562   | 3220561   | 1  | 19.3 | 36.9 | 19.0 | 21.2 |
| chr7  | 4732471J01Rik | Intron2   | Y | 26181409  | 26181708  | 2  | 29.6 | 57.2 | 60.0 | 62.2 |
| chr8  | Evi5l         | Intron9   | Y | 4193218   | 4193305   | 1  | 17.2 | 32.5 | 24.9 | 27.1 |
| chr17 | Ddah2         | Intron3   | Y | 35197648  | 35197777  | 1  | 61.6 | 83.0 | 76.6 | 78.7 |
| chr7  | Rhcg          | Intron10  | Y | 86752618  | 86762225  | 2  | 7.4  | 24.5 | 13.5 | 15.5 |
| chr15 | Pdpx          | Intron1   | Y | 78744962  | 78748559  | 2  | 16.7 | 32.8 | 11.2 | 13.1 |
| chr1  | Lemd1         | Intron1   | Y | 134088067 | 134124760 | 4  | 1.0  | 18.6 | 11.1 | 13.0 |
| chr9  | Slc36a4       | Intron1   | Y | 15514282  | 15524076  | 4  | 17.9 | 34.4 | 11.6 | 13.4 |
| chr7  | Grik5         | Downstre: | Y | 25793870  | 25794869  | 2  | 6.7  | 30.1 | 6.1  | 7.9  |
| chr3  | Tnik          | Intron12  | Y | 28476496  | 28492943  | 1  | 41.0 | 60.0 | 57.0 | 58.7 |
| chr7  | Sptbn4        | Intron18  | Y | 28179324  | 28182969  | 6  | 10.5 | 38.0 | 18.3 | 20.0 |
| chr10 | Cdh23         | Intron68  | Y | 60149852  | 60159047  | 7  | 6.8  | 40.3 | 19.0 | 20.8 |
| chr9  | Il10ra        | Intron1   | Y | 45064525  | 45068435  | 4  | 46.7 | 71.7 | 73.1 | 74.8 |
| chr15 | Cela1         | Exon5     | Y | 100515565 | 100515665 | 1  | 34.0 | 51.2 | 44.9 | 46.6 |
| chr5  | Pxn           | Intron1   | Y | 115956878 | 115994351 | 8  | 54.5 | 84.3 | 51.1 | 52.8 |
| chr3  | Phf17         | Intron1   | Y | 41359742  | 41385116  | 19 | 21.6 | 38.9 | 13.0 | 14.6 |
| chr7  | Ccdc155       | Intron19  | Y | 52455756  | 52459961  | 2  | 1.6  | 23.8 | 24.9 | 26.3 |
| chr7  | Klf13         | Intron1   | Y | 71036684  | 71082852  | 12 | 0.7  | 17.5 | 5.5  | 7.0  |
| chr15 | Wnt7b         | Intron3   | Y | 85389560  | 85411809  | 21 | 3.1  | 33.6 | 7.6  | 9.0  |
| chr9  | Sema3b        | LastExon  | Y | 107500446 | 107501506 | 3  | 63.3 | 88.1 | 79.3 | 80.7 |
| chr7  | Ric8          | Exon2     | Y | 148043881 | 148044471 | 3  | 9.3  | 37.0 | 31.9 | 33.2 |
| chr5  | Srrm4         | Intron12  | Y | 116932546 | 117041342 | 7  | 66.1 | 95.7 | 49.3 | 50.5 |
| chr9  | Bmper         | Intron2   | Y | 23029288  | 23058815  | 1  | 10.9 | 28.0 | 26.6 | 27.8 |
| chr12 | Hs1bp3        | Intron1   | Y | 8320304   | 8324590   | 3  | 1.2  | 16.2 | 9.6  | 10.7 |
| chr9  | Plekho2       | Intron5   | Y | 65420937  | 65427744  | 3  | 9.4  | 35.8 | 20.4 | 21.6 |
| chr15 | Hdac10        | Intron1   | Y | 88953910  | 88953994  | 2  | 2.5  | 34.5 | 17.9 | 19.0 |
| chr6  | lqsec3        | Exon10    | Y | 121362526 | 121363634 | 6  | 0.4  | 19.3 | 6.1  | 7.2  |
| chr7  | B4galnt4      | Exon16    | Y | 148256941 | 148257013 | 1  | 46.3 | 74.7 | 61.2 | 62.3 |
| chr3  | Atp8b2        | Intron26  | Y | 89762972  | 89764996  | 4  | 3.6  | 27.3 | 6.3  | 7.4  |
| chr6  | Sema4f        | Intron13  | Y | 82887207  | 82889454  | 2  | 2.9  | 44.3 | 36.3 | 37.3 |
| chr4  | Astn2         | Intron7   | Y | 65242840  | 65305731  | 5  | 0.9  | 24.0 | 37.7 | 38.8 |

|       |               |          |   |           |           |    |      |      |      |      |
|-------|---------------|----------|---|-----------|-----------|----|------|------|------|------|
| chr11 | Gas211        | Intron1  | Y | 4956693   | 4962157   | 16 | 21.5 | 46.5 | 18.2 | 19.2 |
| chr11 | Map3k14       | Intron15 | Y | 103103704 | 103128651 | 6  | 41.8 | 60.3 | 42.1 | 42.9 |
| chr9  | Rab6b         | Intron1  | Y | 103014557 | 103042711 | 6  | 0.4  | 19.6 | 27.8 | 28.7 |
| chr13 | Prr7          | Intron1  | Y | 55565776  | 55573148  | 10 | 3.5  | 18.9 | 10.6 | 11.4 |
| chr16 | Snn           | Intron1  | Y | 11066541  | 11072324  | 5  | 12.8 | 30.8 | 0.6  | 1.3  |
| chr7  | 4930583K01Rik | Intron1  | Y | 125387480 | 125388241 | 3  | 0.0  | 16.7 | 0.2  | 0.8  |
| chr16 | Tmem44        | Intron2  | Y | 30529657  | 30537539  | 2  | 11.6 | 27.7 | 13.3 | 14.0 |
| chr5  | Art3          | Exon3    | Y | 92821495  | 92822203  | 4  | 27.6 | 43.4 | 32.2 | 32.8 |
| chr13 | Dusp22        | Intron1  | Y | 30752016  | 30760673  | 3  | 8.3  | 26.2 | 1.2  | 1.7  |
| chr8  | Rasa3         | Intron23 | Y | 13631893  | 13677392  | 7  | 30.2 | 45.8 | 30.4 | 30.9 |
| chr7  | Abcc8         | Intron38 | Y | 53433954  | 53435171  | 3  | 0.8  | 29.7 | 8.9  | 9.4  |
| chr5  | Gm9899        | Intron3  | Y | 30885314  | 30890743  | 6  | 0.0  | 31.0 | 2.3  | 2.8  |
| chr5  | Ccdc60        | Intron6  | Y | 116590860 | 116596130 | 2  | 45.7 | 61.1 | 65.8 | 66.3 |
| chr11 | Mmg2          | Intron1  | Y | 62462359  | 62478171  | 4  | 0.0  | 29.8 | 21.9 | 22.3 |
| chr11 | Gcgr          | Intron1  | Y | 120392148 | 120395993 | 3  | 9.4  | 26.5 | 4.8  | 5.2  |
| chr8  | Jph3          | Intron1  | Y | 124254905 | 124276866 | 6  | 1.4  | 28.1 | 18.4 | 18.7 |
| chr5  | Cxcl1         | Intron2  | Y | 91320620  | 91320734  | 1  | 34.8 | 56.5 | 44.4 | 44.7 |
| chr9  | Fam212a       | Intron1  | Y | 107887396 | 107888027 | 3  | 5.5  | 23.6 | 4.7  | 4.9  |
| chr7  | Crtc3         | Intron14 | Y | 87822331  | 87833492  | 5  | 1.0  | 64.5 | 10.5 | 10.7 |
| chr11 | Tnfrsf13b     | Downstre | Y | 60961145  | 60962144  | 2  | 20.3 | 37.9 | 45.1 | 45.3 |
| chr9  | S1pr5         | LastExon | Y | 21047361  | 21049647  | 8  | 1.2  | 19.5 | 1.8  | 2.0  |
| chr8  | Smpd3         | Intron8  | Y | 108812120 | 108861711 | 8  | 5.0  | 22.6 | 17.7 | 17.8 |
| chr5  | Tbc1d1        | Intron1  | Y | 64551745  | 64564626  | 4  | 0.3  | 44.4 | 22.9 | 23.0 |
| chr8  | Ddx19b        | Intron11 | Y | 113547915 | 113555521 | 6  | 45.1 | 93.9 | 18.8 | 18.8 |
| chr15 | Kcns2         | LastExon | Y | 34768205  | 34773162  | 3  | 41.2 | 58.6 | 28.0 | 28.1 |
| chr11 | Ankrd13b      | Intron15 | Y | 77291281  | 77302940  | 3  | 19.9 | 37.0 | 15.4 | 15.4 |
| chr1  | Gm216         | LastExon | Y | 74414967  | 74415895  | 4  | 58.9 | 76.9 | 58.0 | 58.0 |
| chr1  | 2010300C02Rik | Intron2  | Y | 37670327  | 37671325  | 2  | 8.6  | 39.3 | 25.6 | 25.5 |
| chr5  | Mospd3        | LastExon | Y | 138037875 | 138038281 | 3  | 14.3 | 34.2 | 17.0 | 16.9 |
| chr5  | Mospd3        | 3-UTR    | Y | 138037875 | 138038249 | 2  | 14.3 | 34.2 | 17.0 | 16.9 |
| chr4  | Atg4c         | Intron1  | Y | 98861144  | 98879267  | 4  | 60.9 | 93.0 | 63.2 | 63.1 |
| chr19 | Wdr96         | Intron10 | Y | 47827563  | 47830491  | 2  | 57.2 | 77.3 | 70.0 | 69.9 |
| chr11 | E130309D14Rik | Intron3  | Y | 74448791  | 74451459  | 3  | 39.3 | 62.5 | 49.4 | 49.3 |
| chr4  | Ttpa          | Intron1  | Y | 19935791  | 19941777  | 3  | 7.6  | 29.8 | 15.0 | 14.7 |
| chr1  | 5730559C18Rik | Intron1  | Y | 138110996 | 138112332 | 1  | 38.5 | 55.8 | 58.9 | 58.6 |
| chr19 | Rbp4          | Intron2  | Y | 38192975  | 38198518  | 4  | 62.5 | 92.2 | 78.9 | 78.6 |
| chr10 | Tbc1d30       | Intron5  | Y | 120726042 | 120731644 | 1  | 62.5 | 85.0 | 83.3 | 83.0 |
| chr15 | Zfp251        | LastExon | Y | 76682574  | 76685044  | 3  | 69.3 | 85.6 | 90.0 | 89.7 |
| chr1  | Epb4.1l5      | Exon23   | Y | 121539054 | 121539235 | 2  | 62.3 | 78.3 | 65.7 | 65.3 |
| chr16 | Col8a1        | Intron3  | Y | 57678569  | 57754752  | 3  | 0.0  | 47.6 | 62.9 | 62.4 |
| chr4  | Gabrd         | Intron8  | Y | 154763156 | 154772003 | 3  | 0.2  | 53.6 | 37.9 | 37.4 |
| chr5  | Rph3a         | Intron20 | Y | 121436523 | 121458992 | 2  | 31.1 | 56.5 | 38.1 | 37.6 |
| chr16 | Vwa5b2        | Intron6  | Y | 20591624  | 20594252  | 3  | 15.2 | 42.6 | 26.9 | 26.4 |
| chr19 | Gpr137        | Intron6  | Y | 7014973   | 7016413   | 7  | 11.4 | 34.4 | 4.5  | 3.9  |
| chr8  | Zdhhc2        | Intron1  | Y | 41509524  | 41531131  | 5  | 22.7 | 77.3 | 32.1 | 31.4 |
| chr14 | 5031414D18Rik | Intron1  | Y | 75415974  | 75431678  | 4  | 17.4 | 34.1 | 7.9  | 7.2  |
| chr15 | Maff          | LastExon | Y | 79187851  | 79189506  | 6  | 44.4 | 68.5 | 22.5 | 21.9 |
| chr6  | Wdr54         | Exon8    | Y | 83105643  | 83105865  | 2  | 19.7 | 41.6 | 23.9 | 23.1 |
| chr19 | Unc93b1       | Intron7  | Y | 3942819   | 3943528   | 4  | 10.0 | 39.6 | 24.1 | 23.2 |

|       |               |           |   |           |           |    |      |       |      |      |
|-------|---------------|-----------|---|-----------|-----------|----|------|-------|------|------|
| chr14 | Gm16677       | Intron2   | Y | 69950660  | 69954998  | 2  | 5.5  | 40.0  | 3.8  | 2.8  |
| chr9  | Kank2         | Intron3   | Y | 21574571  | 21577188  | 1  | 69.9 | 86.2  | 82.0 | 81.0 |
| chr15 | Maff          | 3-UTR     | Y | 79188286  | 79189506  | 4  | 44.4 | 68.5  | 33.7 | 32.7 |
| chr5  | Agap3         | Intron1   | Y | 23958353  | 23982195  | 13 | 18.6 | 43.1  | 6.8  | 5.7  |
| chr18 | Tnfaip8       | Intron1   | Y | 50213274  | 50249853  | 4  | 49.5 | 65.4  | 51.1 | 50.1 |
| chr16 | Tango2        | Intron8   | Y | 18324544  | 18343987  | 4  | 0.0  | 32.1  | 17.1 | 16.0 |
| chr17 | Sox8          | LastExon  | Y | 25702838  | 25705026  | 5  | 46.9 | 64.8  | 48.4 | 47.1 |
| chr11 | Rab11fip4     | Intron3   | Y | 79434058  | 79494289  | 9  | 1.0  | 29.9  | 11.1 | 9.8  |
| chr17 | Pi16          | Intron1   | Y | 29456337  | 29459130  | 1  | 20.0 | 36.6  | 28.2 | 26.8 |
| chr7  | Snrpn         | Intron9   | Y | 67144300  | 67277135  | 6  | 34.9 | 50.6  | 42.0 | 40.5 |
| chr7  | Syt3          | Intron9   | Y | 51651406  | 51654455  | 1  | 58.0 | 73.6  | 76.5 | 75.0 |
| chr7  | B4galnt4      | Intron14  | Y | 148254661 | 148256309 | 3  | 0.0  | 46.5  | 30.9 | 29.3 |
| chr11 | Kcnab3        | Intron1   | Y | 69140426  | 69141621  | 1  | 10.6 | 27.3  | 16.9 | 15.3 |
| chr17 | Dlgap1        | Intron8   | Y | 71115430  | 71136127  | 1  | 55.1 | 72.8  | 67.9 | 66.3 |
| chr15 | Scn8a         | Intron11  | Y | 100805148 | 100814119 | 2  | 10.1 | 27.5  | 12.4 | 10.5 |
| chr3  | Gpr88         | 3-UTR     | Y | 115952572 | 115954423 | 2  | 0.0  | 17.8  | 14.1 | 12.2 |
| chr5  | Katnal1       | Intron2   | Y | 149690561 | 149700454 | 3  | 23.5 | 41.9  | 32.9 | 30.9 |
| chr11 | Myh3          | Exon7     | Y | 66897577  | 66897669  | 1  | 9.9  | 25.9  | 26.4 | 24.4 |
| chr7  | Gsg1l         | Intron6   | Y | 133164186 | 133225373 | 5  | 8.6  | 37.2  | 45.5 | 43.1 |
| chr10 | Derl3         | Exon2     | Y | 75356515  | 75356588  | 1  | 25.8 | 43.4  | 46.4 | 44.0 |
| chr13 | Mcidas        | Intron3   | Y | 113784657 | 113787050 | 2  | 6.9  | 27.5  | 6.9  | 4.2  |
| chr3  | Frem2         | Intron8   | Y | 53329874  | 53339086  | 1  | 21.0 | 38.0  | 23.6 | 20.8 |
| chr18 | Rnf165        | Intron7   | Y | 77723204  | 77803780  | 8  | 9.2  | 48.6  | 38.6 | 35.7 |
| chr17 | Plcl2         | Intron5   | Y | 50807434  | 50827036  | 2  | 69.2 | 87.3  | 79.2 | 76.2 |
| chr11 | Abcc3         | Intron5   | Y | 94213541  | 94216326  | 1  | 39.1 | 63.5  | 60.3 | 57.3 |
| chr11 | Rufy1         | Exon16    | Y | 50235132  | 50235305  | 1  | 27.3 | 51.7  | 32.0 | 28.9 |
| chr2  | Gata3         | Exon3     | Y | 9796016   | 9796552   | 3  | 26.5 | 45.6  | 38.8 | 35.5 |
| chr15 | Arhgap39      | Intron1   | Y | 76555607  | 76555752  | 1  | 48.1 | 63.5  | 54.1 | 50.7 |
| chr15 | Bik           | Intron1   | Y | 83357367  | 83371724  | 4  | 0.8  | 38.7  | 11.6 | 8.2  |
| chr10 | Hkdc1         | Intron11  | Y | 61866396  | 61868172  | 2  | 55.7 | 79.1  | 71.5 | 68.0 |
| chr14 | 4931414P19Rik | Intron6   | Y | 55214789  | 55224639  | 4  | 0.3  | 29.7  | 15.1 | 11.4 |
| chr17 | Nfkbil1       | Intron1   | Y | 35357922  | 35358081  | 1  | 77.5 | 96.0  | 98.9 | 95.0 |
| chr9  | Stac          | Intron10  | Y | 111537590 | 111592501 | 2  | 10.0 | 39.5  | 19.8 | 15.9 |
| chr12 | Asb2          | Intron3   | Y | 104563825 | 104568554 | 2  | 3.5  | 28.6  | 26.7 | 22.7 |
| chr11 | Gltpd2        | Downstre: | Y | 70334239  | 70335238  | 1  | 70.0 | 86.4  | 74.1 | 69.6 |
| chr9  | Pcbp4         | Downstre: | Y | 106366343 | 106367342 | 3  | 24.3 | 67.9  | 18.8 | 14.2 |
| chr17 | Pisd-ps2      | Intron7   | Y | 3081035   | 3083967   | 3  | 12.0 | 35.1  | 35.9 | 31.3 |
| chr1  | Sema4c        | Intron8   | Y | 36609976  | 36610068  | 1  | 72.4 | 100.0 | 92.7 | 87.9 |
| chr7  | B9d2          | LastExon  | Y | 26471000  | 26471577  | 3  | 25.4 | 57.9  | 59.3 | 54.3 |
| chr15 | Sult4a1       | Intron6   | Y | 83922851  | 83935860  | 4  | 10.4 | 44.1  | 49.1 | 44.0 |
| chr7  | Numb1         | Intron1   | Y | 28043981  | 28047186  | 3  | 4.7  | 30.0  | 12.0 | 6.9  |
| chr9  | Pml           | Exon7     | Y | 58094782  | 58095245  | 2  | 20.0 | 41.0  | 28.5 | 23.0 |
| chr17 | Pglyrp2       | Intron1   | Y | 32550420  | 32553822  | 4  | 13.1 | 49.4  | 33.7 | 28.1 |
| chr15 | Grasp         | Intron7   | Y | 101061483 | 101061947 | 2  | 55.8 | 79.5  | 73.9 | 68.2 |
| chr11 | Coro6         | LastExon  | Y | 77282881  | 77283003  | 2  | 55.2 | 77.5  | 75.2 | 69.0 |
| chr10 | Gna15         | Exon4     | Y | 80975156  | 80975310  | 1  | 17.1 | 33.4  | 30.6 | 24.2 |
| chr15 | Aqp5          | Intron1   | Y | 99422066  | 99423092  | 1  | 44.7 | 62.5  | 55.6 | 48.9 |
| chr5  | BC037034      | Intron9   | Y | 138704205 | 138704294 | 2  | 8.5  | 37.7  | 38.7 | 32.0 |
| chr15 | Tnrc6b        | Intron1   | Y | 80541919  | 80577835  | 6  | 7.8  | 41.3  | 8.3  | 1.1  |

|       |               |           |   |           |           |    |      |      |      |      |
|-------|---------------|-----------|---|-----------|-----------|----|------|------|------|------|
| chr7  | Slc8a2        | Intron3   | Y | 16726518  | 16730279  | 2  | 66.7 | 89.9 | 74.1 | 66.4 |
| chr11 | Aatk          | Intron7   | Y | 119875049 | 119876772 | 3  | 56.0 | 75.6 | 55.4 | 47.6 |
| chr4  | Tnfrsf25      | Intron6   | Y | 151493453 | 151493619 | 1  | 30.8 | 63.6 | 52.4 | 44.4 |
| chr7  | Lrfn1         | Intron4   | Y | 29245083  | 29251607  | 2  | 54.3 | 75.5 | 82.3 | 74.4 |
| chr15 | Itgb7         | Intron11  | Y | 102054004 | 102054732 | 1  | 29.8 | 51.2 | 48.2 | 40.0 |
| chr17 | Tmem63b       | Intron6   | Y | 45800619  | 45801692  | 1  | 51.7 | 67.2 | 62.5 | 54.2 |
| chr14 | Bmp1          | Intron18  | Y | 70908722  | 70911387  | 1  | 50.0 | 73.1 | 63.0 | 54.5 |
| chr9  | Gpr62         | 3-UTR     | Y | 106366291 | 106366981 | 2  | 24.3 | 67.9 | 36.0 | 27.0 |
| chr11 | 1700051A21Rik | Intron1   | Y | 72081028  | 72081382  | 2  | 17.5 | 37.0 | 24.2 | 15.1 |
| chr9  | Rbpms2        | Intron1   | Y | 65478705  | 65497155  | 4  | 55.1 | 65.5 | 19.1 | 65.3 |
| chr11 | Epn3          | LastExon  | Y | 94350913  | 94352793  | 4  | 66.7 | 78.6 | 30.6 | 71.1 |
| chr5  | Gm16065       | Intron1   | Y | 120136064 | 120138232 | 5  | 55.0 | 52.4 | 31.2 | 71.0 |
| chr4  | Ttc34         | Intron1   | Y | 154230553 | 154232069 | 2  | 2.3  | 6.2  | 0.4  | 38.3 |
| chr10 | Adamts15      | Intron1   | Y | 79804202  | 79804333  | 1  | 60.0 | 70.5 | 46.6 | 84.0 |
| chr8  | Hsf4          | Intron4   | Y | 107795013 | 107795273 | 1  | 41.5 | 50.0 | 25.9 | 63.1 |
| chr18 | Siglec15      | Intron4   | Y | 78245612  | 78245968  | 2  | 39.1 | 40.8 | 2.3  | 38.5 |
| chr2  | Xkr7          | Intron1   | Y | 152858335 | 152878449 | 4  | 51.9 | 54.9 | 29.7 | 64.6 |
| chr6  | Clec2l        | Intron1   | Y | 38613416  | 38623441  | 3  | 38.3 | 24.8 | 0.7  | 34.6 |
| chr11 | Epn3          | 3-UTR     | Y | 94350913  | 94352464  | 2  | 66.7 | 78.6 | 39.3 | 72.9 |
| chr6  | Tcf7l1        | Intron10  | Y | 72599198  | 72738204  | 5  | 74.3 | 75.5 | 27.6 | 60.8 |
| chr5  | Dnah10        | Intron1   | Y | 125205751 | 125207197 | 2  | 63.5 | 66.9 | 41.2 | 73.6 |
| chr5  | Sirt4         | Intron4   | Y | 115933128 | 115934340 | 3  | 35.6 | 27.2 | 0.4  | 31.9 |
| chr10 | Cnn2          | Intron1   | Y | 79451486  | 79454104  | 6  | 46.3 | 47.2 | 46.1 | 77.5 |
| chr4  | Ptchd2        | Intron19  | Y | 147644706 | 147645549 | 2  | 28.8 | 36.9 | 38.3 | 68.8 |
| chr18 | Pcdhga9       | LastExon  | Y | 37999557  | 38001517  | 4  | 90.6 | 88.1 | 50.1 | 79.4 |
| chr11 | Fbxo39        | Intron1   | Y | 72128038  | 72130246  | 2  | 56.0 | 69.5 | 33.6 | 62.7 |
| chr4  | Prkcz         | Intron14  | Y | 154675125 | 154728762 | 7  | 60.4 | 70.3 | 48.0 | 76.6 |
| chr8  | Jak3          | 3-UTR     | Y | 74212047  | 74214476  | 10 | 63.1 | 67.3 | 38.0 | 66.7 |
| chr7  | Bcl3          | Exon4     | Y | 20396669  | 20396757  | 1  | 18.4 | 32.6 | 12.9 | 41.0 |
| chr8  | Jak3          | Intron24  | Y | 74212062  | 74214070  | 8  | 63.1 | 64.7 | 32.1 | 59.8 |
| chr18 | Dsg2          | Intron13  | Y | 20754583  | 20756839  | 1  | 72.0 | 80.0 | 67.4 | 95.1 |
| chr7  | Eid2b         | 3-UTR     | Y | 29063256  | 29065148  | 2  | 95.4 | 93.7 | 66.1 | 93.7 |
| chr15 | Baiap2l2      | Intron4   | Y | 79090205  | 79091503  | 2  | 70.8 | 82.4 | 57.2 | 84.3 |
| chr6  | Prdm5         | Intron1   | Y | 65729188  | 65744293  | 2  | 19.2 | 29.8 | 12.5 | 39.3 |
| chr11 | Nr1d1         | Intron1   | Y | 98629734  | 98630362  | 2  | 21.0 | 27.0 | 15.0 | 41.4 |
| chr5  | Ncf1          | Intron2   | Y | 134698046 | 134698551 | 3  | 53.0 | 52.4 | 24.9 | 51.0 |
| chr1  | Ugt1a6b       | Intron2   | Y | 90004375  | 90111618  | 6  | 71.2 | 77.3 | 33.4 | 59.2 |
| chr1  | Ugt1a10       | Intron1   | Y | 89952912  | 90111618  | 6  | 71.2 | 77.3 | 33.4 | 59.2 |
| chr1  | Ugt1a5        | Intron1   | Y | 90063479  | 90111618  | 6  | 71.2 | 77.3 | 33.4 | 59.2 |
| chr11 | Rasgef1c      | Intron1   | Y | 49715470  | 49770535  | 6  | 80.8 | 74.6 | 39.7 | 65.1 |
| chr14 | Ripk3         | Downstre: | Y | 56402832  | 56403831  | 3  | 37.5 | 49.1 | 38.5 | 64.0 |
| chr19 | Gal           | Intron4   | Y | 3413350   | 3414031   | 1  | 39.6 | 37.5 | 22.4 | 47.1 |
| chr7  | Fkrp          | LastExon  | Y | 17394616  | 17397325  | 9  | 90.6 | 84.5 | 52.0 | 76.6 |
| chr4  | Lrp8          | Intron4   | Y | 107515950 | 107520045 | 7  | 74.7 | 83.1 | 45.0 | 69.5 |
| chr7  | Tnnt1         | Intron3   | Y | 4459215   | 4460075   | 4  | 65.3 | 79.9 | 60.0 | 84.5 |
| chr6  | Dctn1         | Exon5     | Y | 83136422  | 83136439  | 1  | 67.2 | 77.0 | 46.6 | 71.0 |
| chr8  | Lrrc25        | Downstre: | Y | 73144750  | 73145749  | 2  | 51.7 | 65.3 | 40.7 | 64.1 |
| chr7  | Phox2a        | Intron1   | Y | 108967229 | 108969294 | 3  | 29.1 | 32.5 | 22.8 | 46.1 |
| chr16 | Liph          | Exon6     | Y | 21976306  | 21976407  | 1  | 29.6 | 44.0 | 24.8 | 48.1 |

|       |               |          |   |           |           |    |      |      |      |      |
|-------|---------------|----------|---|-----------|-----------|----|------|------|------|------|
| chr6  | Dnah6         | Intron71 | Y | 73142808  | 73142893  | 1  | 58.9 | 50.8 | 54.9 | 78.0 |
| chr8  | Zfx3          | Intron1  | Y | 111239231 | 111316101 | 5  | 90.0 | 93.1 | 69.1 | 92.0 |
| chr15 | Hdac7         | Intron12 | Y | 97632982  | 97633113  | 1  | 55.0 | 61.8 | 53.0 | 75.8 |
| chr2  | Spef1         | LastExon | Y | 130995997 | 130997526 | 3  | 26.5 | 41.0 | 18.1 | 40.8 |
| chr7  | Trim72        | LastExon | Y | 135153401 | 135154907 | 4  | 79.8 | 80.9 | 56.9 | 79.5 |
| chr2  | Psd4          | Intron15 | Y | 24260972  | 24261206  | 1  | 44.0 | 52.9 | 40.3 | 62.7 |
| chr8  | Stox2         | Intron4  | Y | 48288628  | 48437384  | 14 | 56.3 | 67.7 | 10.3 | 32.5 |
| chr16 | Tmem191c      | Exon6    | Y | 17277621  | 17277685  | 1  | 17.4 | 32.0 | 13.4 | 35.5 |
| chr5  | Tfr2          | LastExon | Y | 138028057 | 138028709 | 2  | 26.9 | 32.0 | 41.8 | 63.4 |
| chr19 | Map4k2        | Intron4  | Y | 6341968   | 6342254   | 1  | 72.7 | 87.0 | 58.6 | 80.0 |
| chr12 | Pigh          | Intron3  | Y | 80186844  | 80190426  | 2  | 19.6 | 17.2 | 0.3  | 21.6 |
| chr17 | Gm7325        | Intron1  | Y | 45738635  | 45738959  | 1  | 49.2 | 49.2 | 39.3 | 60.6 |
| chr1  | Des           | Intron1  | Y | 75357568  | 75358732  | 2  | 52.9 | 43.8 | 43.4 | 64.6 |
| chr5  | Zfp316        | Intron1  | Y | 144017245 | 144024471 | 1  | 77.3 | 69.0 | 64.3 | 85.5 |
| chr11 | Cntnap1       | Exon7    | Y | 101041624 | 101041885 | 1  | 57.1 | 70.9 | 54.0 | 74.7 |
| chr4  | 1300002K09Rik | Intron7  | Y | 45882078  | 45882431  | 2  | 71.1 | 77.7 | 64.3 | 84.7 |
| chr15 | Chadl         | Intron4  | Y | 81525674  | 81526279  | 1  | 75.9 | 82.1 | 66.4 | 86.6 |
| chr7  | Slc17a7       | Intron9  | Y | 52427561  | 52428261  | 1  | 21.4 | 13.9 | 14.8 | 35.0 |
| chr17 | Usp49         | Exon2    | Y | 47808993  | 47810367  | 8  | 83.4 | 90.8 | 54.1 | 74.3 |
| chr1  | Lefty1        | Intron3  | Y | 182867386 | 182867742 | 1  | 53.1 | 66.7 | 29.2 | 49.2 |
| chr2  | Pax8          | Intron10 | Y | 24300252  | 24330592  | 7  | 40.6 | 43.6 | 43.0 | 63.0 |
| chr17 | 4930539E08Rik | Exon10   | Y | 29046237  | 29046817  | 3  | 39.6 | 42.0 | 18.7 | 38.5 |
| chr11 | Krt12         | Intron2  | Y | 99278280  | 99279228  | 1  | 58.1 | 62.1 | 47.2 | 67.0 |
| chr6  | Slc6a11       | Intron1  | Y | 114081512 | 114084592 | 2  | 43.1 | 42.5 | 23.4 | 43.2 |
| chr7  | Myo7a         | Intron33 | Y | 105232177 | 105233893 | 2  | 51.9 | 63.5 | 43.3 | 63.1 |
| chr4  | Ttll10        | Intron1  | Y | 155409561 | 155409854 | 1  | 63.7 | 76.3 | 58.2 | 77.8 |
| chr6  | Hoxa3         | LastExon | Y | 52119061  | 52120741  | 6  | 76.5 | 88.2 | 69.5 | 89.1 |
| chr8  | Acta1         | Intron4  | Y | 126416895 | 126417045 | 1  | 33.7 | 38.1 | 22.7 | 42.3 |
| chr19 | Rab1b         | Downstre | Y | 5098207   | 5099206   | 5  | 30.0 | 41.3 | 18.0 | 37.5 |
| chr19 | Kcnk4         | LastExon | Y | 7000180   | 7000865   | 3  | 18.5 | 29.5 | 16.9 | 36.3 |
| chr8  | Foxf1         | Intron1  | Y | 123609275 | 123610618 | 1  | 24.0 | 27.6 | 14.7 | 34.0 |
| chr3  | Gipc2         | Intron2  | Y | 151765665 | 151770904 | 7  | 61.6 | 73.7 | 58.2 | 77.3 |
| chr5  | Sirt4         | Exon3    | Y | 115932633 | 115933127 | 3  | 68.1 | 80.4 | 65.9 | 84.9 |
| chr11 | Tbkbp1        | Intron3  | Y | 97000905  | 97007613  | 1  | 46.6 | 60.7 | 61.1 | 80.0 |
| chr6  | Eva1a         | LastExon | Y | 82041788  | 82043093  | 3  | 49.7 | 55.5 | 38.4 | 57.3 |
| chr17 | Anks1         | Exon11   | Y | 28144794  | 28145377  | 2  | 68.8 | 80.8 | 64.3 | 83.1 |
| chr15 | C1ql4         | LastExon | Y | 98915185  | 98915364  | 1  | 31.3 | 40.8 | 25.6 | 44.4 |
| chr17 | Efna5         | Intron4  | Y | 63000484  | 63230354  | 9  | 91.9 | 92.0 | 26.4 | 45.1 |
| chr15 | Zfp641        | Intron5  | Y | 98124260  | 98126485  | 4  | 0.7  | 3.0  | 29.7 | 48.3 |
| chr6  | 2010107G12Rik | Intron1  | Y | 34896227  | 34903764  | 3  | 14.5 | 28.3 | 5.7  | 24.3 |
| chr4  | Tmeff1        | Exon4    | Y | 48630107  | 48630203  | 1  | 90.5 | 94.1 | 74.9 | 93.5 |
| chr7  | Myh14         | Intron31 | Y | 51896550  | 51898833  | 2  | 74.4 | 72.7 | 57.2 | 75.6 |
| chr17 | Notch4        | Intron27 | Y | 34723155  | 34723471  | 1  | 8.3  | 15.2 | 2.9  | 21.2 |
| chr12 | Wdr25         | Intron2  | Y | 110136936 | 110218900 | 3  | 17.1 | 28.6 | 16.0 | 34.2 |
| chr10 | Dos           | Intron1  | Y | 79594997  | 79595749  | 1  | 90.0 | 82.1 | 79.4 | 97.5 |
| chr4  | Arhgef19      | Exon4    | Y | 140803293 | 140803401 | 1  | 29.3 | 44.1 | 30.1 | 48.2 |
| chr12 | Hhipl1        | Intron8  | Y | 109565419 | 109565877 | 2  | 70.0 | 76.7 | 62.2 | 80.1 |
| chr8  | Gpr124        | LastExon | Y | 28231238  | 28233908  | 7  | 67.3 | 64.1 | 53.8 | 71.2 |
| chr14 | Comtd1        | LastExon | Y | 22665083  | 22666649  | 2  | 37.4 | 42.6 | 22.0 | 39.3 |

|       |               |           |   |           |           |    |      |       |      |       |
|-------|---------------|-----------|---|-----------|-----------|----|------|-------|------|-------|
| chr17 | Abcg8         | Intron5   | Y | 85091957  | 85092050  | 1  | 80.5 | 93.0  | 75.5 | 92.7  |
| chr5  | Tmem184a      | Exon4     | Y | 140283748 | 140283823 | 1  | 45.5 | 56.8  | 54.0 | 71.2  |
| chr14 | Fam124a       | Intron3   | Y | 63206724  | 63224709  | 1  | 66.4 | 73.6  | 51.6 | 68.6  |
| chr8  | B3gnt3        | Intron1   | Y | 74217055  | 74217215  | 1  | 82.3 | 94.0  | 72.0 | 89.0  |
| chr17 | Angptl4       | Intron6   | Y | 33917839  | 33918007  | 1  | 51.1 | 41.7  | 40.0 | 56.9  |
| chr18 | Arap3         | Intron17  | Y | 38145187  | 38147208  | 1  | 75.8 | 69.0  | 73.5 | 90.4  |
| chr4  | A3galt2       | 3-UTR     | Y | 128444917 | 128446542 | 1  | 64.3 | 76.9  | 73.2 | 90.0  |
| chr17 | Prrt1         | Intron1   | Y | 34766650  | 34767577  | 2  | 72.5 | 84.5  | 67.3 | 84.1  |
| chr2  | C330006A16Rik | LastExon  | Y | 25992328  | 25994433  | 4  | 90.6 | 92.9  | 72.9 | 89.6  |
| chr7  | Irgq          | 3-UTR     | Y | 25319507  | 25323619  | 1  | 79.5 | 81.1  | 69.3 | 86.1  |
| chr15 | Olf279        | Downstre: | Y | 98328838  | 98329837  | 1  | 84.4 | 86.8  | 77.9 | 94.6  |
| chr13 | Spata31d1d    | LastExon  | Y | 59827286  | 59830778  | 3  | 50.6 | 43.5  | 23.1 | 39.8  |
| chr15 | Cacng2        | LastExon  | Y | 77824053  | 77826114  | 4  | 84.3 | 75.2  | 63.7 | 80.4  |
| chr12 | Adssl1        | Intron1   | Y | 113858522 | 113866511 | 2  | 19.0 | 26.9  | 9.0  | 25.7  |
| chr10 | Tmprss9       | Intron10  | Y | 80353242  | 80354901  | 1  | 73.8 | 78.6  | 63.9 | 80.5  |
| chr11 | Hdac5         | Exon25    | Y | 102086048 | 102086269 | 2  | 7.5  | 19.0  | 14.6 | 31.2  |
| chr7  | Ryr1          | Intron93  | Y | 29890076  | 29894218  | 1  | 10.6 | 21.2  | 10.4 | 26.9  |
| chr10 | Hcn2          | Intron3   | Y | 79189054  | 79191637  | 1  | 50.0 | 48.4  | 49.2 | 65.6  |
| chr15 | Letmd1        | Intron2   | Y | 100300268 | 100302090 | 1  | 19.8 | 25.4  | 14.1 | 30.5  |
| chr16 | Rwdd2b        | Exon2     | Y | 87437309  | 87437376  | 1  | 80.4 | 87.0  | 74.7 | 91.1  |
| chr9  | Pth1r         | Intron9   | Y | 110630010 | 110630181 | 1  | 93.1 | 88.9  | 77.4 | 93.8  |
| chr11 | Fdxr          | Downstre: | Y | 115128339 | 115129338 | 3  | 32.0 | 33.3  | 12.7 | 29.0  |
| chr10 | Cradd         | Intron1   | Y | 94638613  | 94785219  | 6  | 81.2 | 90.1  | 52.4 | 68.7  |
| chr7  | Sbk1          | Intron3   | Y | 133434760 | 133435338 | 1  | 81.8 | 85.4  | 68.6 | 84.9  |
| chr11 | Sarm1         | Intron4   | Y | 78297159  | 78300724  | 1  | 4.5  | 18.5  | 13.5 | 29.7  |
| chr8  | Palm3         | Intron2   | Y | 86548300  | 86550092  | 2  | 19.7 | 19.1  | 13.7 | 29.9  |
| chr6  | Hoxa3         | Downstre: | Y | 52118061  | 52119060  | 3  | 78.3 | 85.2  | 68.9 | 85.0  |
| chr11 | Myo15         | Intron23  | Y | 60310071  | 60310419  | 1  | 57.7 | 53.7  | 58.6 | 74.7  |
| chr1  | Rassf5        | Intron5   | Y | 133108956 | 133141265 | 3  | 70.4 | 75.0  | 51.1 | 67.2  |
| chr9  | Keap1         | Exon4     | Y | 21041515  | 21042200  | 4  | 73.9 | 80.4  | 40.6 | 56.7  |
| chr4  | Trabd2b       | Intron1   | Y | 114079525 | 114081497 | 2  | 33.4 | 45.7  | 32.5 | 48.6  |
| chr9  | Igdcc4        | Intron7   | Y | 64971997  | 64972418  | 1  | 70.8 | 82.5  | 61.9 | 78.0  |
| chr5  | Crmp1         | Intron1   | Y | 37633765  | 37656470  | 12 | 31.3 | 29.0  | 15.3 | 31.4  |
| chr5  | Cit           | Intron8   | Y | 116336817 | 116358646 | 4  | 29.1 | 40.8  | 27.3 | 43.2  |
| chr1  | Kiss1         | Downstre: | Y | 135226300 | 135227299 | 1  | 15.0 | 19.8  | 17.4 | 33.3  |
| chr19 | Kcnk4         | 3-UTR     | Y | 7000180   | 7000472   | 2  | 18.5 | 29.5  | 16.2 | 32.1  |
| chr7  | Bcl3          | Exon3     | Y | 20396406  | 20396483  | 1  | 60.4 | 74.4  | 62.5 | 78.3  |
| chr17 | Pi16          | Intron3   | Y | 29462928  | 29463218  | 1  | 73.9 | 74.4  | 67.6 | 83.4  |
| chr6  | Fam19a1       | Intron2   | Y | 96065749  | 96473328  | 6  | 44.5 | 42.8  | 31.0 | 46.9  |
| chr8  | Thap11        | 3-UTR     | Y | 108380179 | 108380850 | 1  | 32.3 | 24.5  | 17.2 | 33.1  |
| chr11 | Arhgap27      | Exon3     | Y | 103194885 | 103194962 | 1  | 64.8 | 77.6  | 57.4 | 73.2  |
| chr19 | Kcnk4         | Intron1   | Y | 7000866   | 7001580   | 3  | 20.9 | 33.3  | 18.6 | 34.5  |
| chr1  | A630095N17Rik | LastExon  | Y | 75216670  | 75217148  | 2  | 63.8 | 66.0  | 53.3 | 69.1  |
| chr1  | A630095N17Rik | 3-UTR     | Y | 75216670  | 75217034  | 2  | 63.8 | 66.0  | 53.3 | 69.1  |
| chr12 | Dlk1          | Intron2   | Y | 110691937 | 110693194 | 2  | 31.8 | 40.6  | 25.2 | 41.0  |
| chr6  | Mical3        | Intron6   | Y | 120907812 | 120908258 | 1  | 85.3 | 100.0 | 84.2 | 100.0 |
| chr17 | Plekhh2       | Intron2   | Y | 84921166  | 84946802  | 2  | 89.2 | 92.0  | 76.7 | 92.4  |
| chr4  | Epha10        | Intron9   | Y | 124589310 | 124589426 | 1  | 66.1 | 68.6  | 56.7 | 72.4  |
| chr4  | Chd5          | Intron7   | Y | 151733921 | 151734672 | 1  | 35.8 | 30.8  | 30.0 | 45.6  |

|       |         |           |   |           |           |   |      |      |      |      |
|-------|---------|-----------|---|-----------|-----------|---|------|------|------|------|
| chr5  | Ncor2   | Intron30  | Y | 125536246 | 125546209 | 7 | 87.1 | 95.7 | 54.6 | 70.1 |
| chr1  | Zfp281  | LastExon  | Y | 138521849 | 138526968 | 6 | 46.7 | 50.3 | 24.3 | 39.9 |
| chr18 | Wnt8a   | Exon2     | Y | 34702498  | 34702636  | 1 | 50.0 | 53.8 | 47.6 | 63.2 |
| chr12 | Syt16   | Intron1   | Y | 75098851  | 75230358  | 3 | 40.0 | 43.2 | 24.6 | 40.1 |
| chr18 | Egr1    | LastExon  | Y | 35022119  | 35024610  | 2 | 12.6 | 27.5 | 14.3 | 29.5 |
| chr9  | Osbpl10 | Exon5     | Y | 115125667 | 115126147 | 2 | 25.3 | 17.1 | 22.5 | 37.6 |
| chr7  | Shank2  | Intron1   | Y | 151361862 | 151365659 | 1 | 71.3 | 85.6 | 62.7 | 77.8 |
| chr1  | Zdbf2   | 3-UTR     | Y | 63356520  | 63361149  | 1 | 72.3 | 71.1 | 46.2 | 61.3 |
| chr9  | Cyp1a2  | Intron5   | Y | 57528919  | 57529508  | 1 | 70.8 | 84.9 | 70.5 | 85.6 |
| chr2  | Rtn4rl2 | Downstre: | Y | 84711103  | 84712102  | 3 | 24.9 | 30.8 | 21.7 | 36.7 |
| chr7  | Dact3   | Intron3   | Y | 17468860  | 17470429  | 1 | 72.6 | 80.7 | 64.4 | 79.4 |
| chr6  | Hoxa3   | Intron1   | Y | 52120742  | 52122119  | 2 | 85.7 | 90.6 | 75.6 | 90.6 |

### Group 3-mDMR genes associated with methylation loss at 5' CGI

| Chr   | Gene          | Region   | CGI | Start     | End       | #Bins | DNA Methylation Level (%) |      |             |      |
|-------|---------------|----------|-----|-----------|-----------|-------|---------------------------|------|-------------|------|
|       |               |          |     |           |           |       | ISCs                      |      | Diff. Cells |      |
|       |               |          |     |           |           |       | P0                        | P21  | P0          | P21  |
| chr5  | Klhl8         | Upstream | Y   | 104340249 | 104341248 | 3     | 46.1                      | 26.9 | 45.3        | 1.0  |
| chr6  | Lpar5         | 5-UTR    | Y   | 125017938 | 125031335 | 2     | 61.3                      | 10.2 | 77.0        | 34.7 |
| chr9  | Mir425        | 5-UTR    | Y   | 108471108 | 108471192 | 1     | 57.6                      | 2.4  | 53.8        | 15.5 |
| chr3  | Glr3          | Upstream | Y   | 80717547  | 80718546  | 4     | 60.9                      | 33.3 | 36.8        | 0.7  |
| chr9  | 1600029D21Rik | Exon1    | Y   | 50307200  | 50307404  | 2     | 69.5                      | 52.7 | 76.5        | 41.5 |
| chr9  | 2310014F07Rik | Exon1    | Y   | 50307031  | 50307275  | 1     | 71.0                      | 45.7 | 75.3        | 41.5 |
| chr18 | Proc          | 5-UTR    | Y   | 32295585  | 32299224  | 1     | 65.0                      | 15.2 | 37.8        | 10.4 |
| chr18 | Proc          | Exon1    | Y   | 32299164  | 32299224  | 1     | 65.0                      | 15.2 | 37.8        | 10.4 |
| chr14 | Klhl33        | Exon1    | Y   | 51512050  | 51512930  | 3     | 58.6                      | 37.5 | 83.6        | 56.6 |
| chr14 | Haus4         | Upstream | Y   | 55173199  | 55174198  | 4     | 26.9                      | 11.3 | 29.9        | 3.2  |
| chr13 | Tmem174       | 5-UTR    | Y   | 99407276  | 99407365  | 1     | 77.8                      | 48.9 | 82.8        | 57.9 |
| chr7  | Oscar         | Exon1    | Y   | 3562671   | 3562952   | 1     | 58.1                      | 30.1 | 59.7        | 35.0 |
| chr19 | Bloc1s2       | Upstream | Y   | 44220937  | 44221936  | 2     | 33.6                      | 10.3 | 35.9        | 12.6 |
| chr4  | Pank4         | Upstream | Y   | 154337242 | 154338241 | 3     | 54.4                      | 33.6 | 60.8        | 37.5 |
| chr11 | Sfi1          | Exon1    | Y   | 3032219   | 3032330   | 1     | 82.5                      | 60.2 | 80.2        | 58.2 |
| chr9  | Vstm5         | Upstream | Y   | 15042489  | 15043488  | 3     | 20.1                      | 0.0  | 36.4        | 15.5 |
| chr9  | Acat1         | Upstream | Y   | 53418456  | 53419455  | 2     | 26.3                      | 7.3  | 30.6        | 11.0 |
| chr4  | Tex10         | Upstream | Y   | 48486295  | 48487294  | 2     | 37.1                      | 6.6  | 25.3        | 5.9  |
| chr6  | Slc41a3       | Upstream | Y   | 90553874  | 90554873  | 3     | 66.7                      | 33.3 | 19.1        | 0.4  |
| chr9  | Dalrd3        | Upstream | Y   | 108471223 | 108472222 | 2     | 23.5                      | 0.5  | 23.1        | 4.4  |
| chr15 | A4galt        | Upstream | Y   | 83082205  | 83083204  | 4     | 55.0                      | 34.4 | 50.3        | 32.1 |
| chr3  | Ppa2          | Upstream | Y   | 132972080 | 132973079 | 3     | 53.2                      | 31.0 | 34.4        | 16.2 |
| chr13 | Txndc5        | Upstream | Y   | 38620330  | 38621329  | 4     | 23.4                      | 8.4  | 21.6        | 4.8  |
| chr19 | Neat1         | 5-UTR    | Y   | 5842302   | 5845478   | 4     | 28.4                      | 0.8  | 20.7        | 4.0  |
| chr10 | Fam26f        | 5-UTR    | Y   | 33847716  | 33847778  | 1     | 69.2                      | 46.9 | 74.3        | 57.8 |
| chr18 | Proc          | Upstream | Y   | 32299225  | 32300224  | 2     | 43.8                      | 2.9  | 22.9        | 6.5  |
| chr8  | Syce2         | Upstream | Y   | 87395010  | 87396009  | 3     | 62.0                      | 45.0 | 42.6        | 27.4 |
| chr13 | Cltb          | Exon1    | Y   | 54700083  | 54700194  | 1     | 32.8                      | 8.1  | 20.6        | 6.0  |
| chr6  | Crbn          | Upstream | Y   | 106750082 | 106751081 | 2     | 29.3                      | 2.2  | 16.2        | 2.0  |
| chr17 | Twsg1         | Upstream | Y   | 66300528  | 66301527  | 3     | 21.6                      | 0.6  | 16.9        | 3.0  |
| chr6  | Mkrn1         | Upstream | Y   | 39370369  | 39371368  | 3     | 55.0                      | 40.0 | 14.1        | 0.6  |
| chr2  | Lcmt2         | Exon1    | Y   | 120963028 | 120966434 | 8     | 47.1                      | 9.9  | 15.2        | 1.7  |



|       |               |          |   |           |           |   |      |      |      |      |
|-------|---------------|----------|---|-----------|-----------|---|------|------|------|------|
| chr2  | Lrrc26        | Upstream | Y | 25144431  | 25145430  | 1 | 33.3 | 0.0  | 13.0 | 0.0  |
| chr14 | Gjb2          | 5-UTR    | Y | 57719587  | 57723539  | 7 | 33.7 | 8.3  | 20.0 | 7.1  |
| chr9  | Usp19         | Upstream | Y | 108392007 | 108393006 | 4 | 42.9 | 23.7 | 30.0 | 17.7 |
| chr17 | Gtf2a1l       | 5-UTR    | Y | 89068000  | 89068050  | 1 | 46.6 | 18.5 | 28.6 | 16.4 |
| chr17 | Gtf2a1l       | Exon1    | Y | 89068000  | 89068071  | 2 | 46.6 | 18.5 | 28.6 | 16.4 |
| chr8  | Bcar1         | Upstream | Y | 114267750 | 114268749 | 4 | 33.4 | 14.7 | 21.3 | 9.2  |
| chr17 | Rftn1         | Upstream | Y | 50329823  | 50330822  | 4 | 42.3 | 16.4 | 24.9 | 13.1 |
| chr17 | Slc3a1        | Exon1    | Y | 85427687  | 85428198  | 1 | 84.3 | 61.4 | 73.9 | 63.2 |
| chr15 | Racgap1       | Upstream | Y | 99482088  | 99483087  | 2 | 33.3 | 12.0 | 10.5 | 0.0  |
| chr7  | Bbc3          | Upstream | Y | 16893932  | 16894931  | 5 | 39.0 | 18.5 | 21.5 | 11.1 |
| chr7  | Rras2         | Upstream | Y | 121261296 | 121262295 | 3 | 17.3 | 2.0  | 13.1 | 3.1  |
| chr17 | Clip4         | 5-UTR    | Y | 72119031  | 72139222  | 8 | 66.8 | 35.8 | 34.2 | 24.4 |
| chr17 | Srrm2         | 5-UTR    | Y | 23940154  | 23945078  | 8 | 31.9 | 13.3 | 18.6 | 8.9  |
| chr10 | Fam26f        | Upstream | Y | 33847779  | 33848778  | 1 | 79.5 | 47.8 | 76.2 | 66.7 |
| chr16 | Htr1f         | 5-UTR    | Y | 64926754  | 65105610  | 3 | 59.3 | 26.6 | 27.5 | 18.0 |
| chr11 | Ube2z         | Upstream | Y | 95926679  | 95927678  | 4 | 32.7 | 14.7 | 9.7  | 0.6  |
| chr2  | Dhrs9         | Exon1    | Y | 69218519  | 69218688  | 1 | 42.9 | 11.3 | 20.8 | 12.1 |
| chr15 | Lima1         | 5-UTR    | Y | 99674225  | 99705887  | 4 | 35.9 | 7.3  | 29.5 | 20.8 |
| chr12 | Acot5         | Upstream | Y | 85409275  | 85410274  | 1 | 29.4 | 5.4  | 20.0 | 11.6 |
| chr18 | Mbd2          | Upstream | Y | 70726946  | 70727945  | 2 | 68.2 | 16.7 | 27.2 | 19.0 |
| chr18 | 2700062C07Rik | Upstream | Y | 24628372  | 24629371  | 2 | 58.7 | 26.7 | 32.0 | 24.4 |
| chr11 | Cenpv         | Upstream | Y | 62352764  | 62353763  | 2 | 18.5 | 1.4  | 8.6  | 1.1  |
| chr14 | Nisch         | Upstream | Y | 32020013  | 32021012  | 2 | 44.1 | 11.7 | 17.6 | 10.2 |
| chr7  | Seps2         | Exon1    | Y | 134415395 | 134417573 | 5 | 33.9 | 12.9 | 13.8 | 6.5  |
| chr15 | Krt4          | Exon1    | Y | 101754613 | 101755166 | 3 | 94.8 | 56.3 | 65.3 | 58.0 |
| chr7  | Homer2        | Upstream | Y | 88851812  | 88852811  | 5 | 50.4 | 31.4 | 27.7 | 20.8 |
| chr11 | Mfsd6l        | Exon1    | Y | 68369688  | 68371747  | 3 | 25.6 | 2.1  | 10.1 | 3.3  |
| chr12 | Crip2         | Upstream | Y | 114377447 | 114378446 | 3 | 35.5 | 16.2 | 8.4  | 1.7  |
| chr2  | Rbm45         | Upstream | Y | 76207041  | 76208040  | 2 | 60.0 | 28.0 | 25.6 | 18.9 |
| chr8  | Mbtps1        | Upstream | Y | 122082662 | 122083661 | 3 | 45.4 | 16.7 | 18.3 | 11.9 |
| chr11 | Kif19a        | Upstream | Y | 114625703 | 114626702 | 4 | 50.0 | 19.3 | 20.5 | 14.1 |
| chr2  | Dhrs9         | 5-UTR    | Y | 69218519  | 69230966  | 2 | 33.2 | 9.6  | 16.1 | 9.7  |
| chr4  | Serinc2       | Upstream | Y | 129952831 | 129953830 | 3 | 23.3 | 8.0  | 13.9 | 7.7  |
| chr4  | Zc3h12a       | 5-UTR    | Y | 124804293 | 124805125 | 4 | 22.5 | 1.0  | 7.0  | 1.3  |
| chr11 | Hoxb5         | Exon1    | Y | 96164826  | 96165489  | 4 | 37.3 | 13.0 | 31.0 | 25.4 |
| chr2  | Hoxd10        | Exon1    | Y | 74529948  | 74530781  | 4 | 33.2 | 14.1 | 21.4 | 15.8 |
| chr2  | Asb6          | Upstream | Y | 30683821  | 30684820  | 2 | 45.0 | 21.7 | 27.7 | 22.2 |
| chr10 | Map2k2        | Upstream | Y | 80567692  | 80568691  | 3 | 44.4 | 24.0 | 10.6 | 5.2  |
| chr1  | Bend6         | 5-UTR    | Y | 33940406  | 33964466  | 5 | 34.9 | 3.0  | 7.9  | 2.6  |
| chr6  | Ggct          | Upstream | Y | 54942862  | 54943861  | 3 | 24.4 | 7.9  | 12.5 | 7.3  |
| chr14 | Fam167a       | Upstream | Y | 64054231  | 64055230  | 4 | 74.0 | 35.8 | 48.2 | 43.0 |
| chr2  | Cables2       | Upstream | Y | 180008171 | 180009170 | 4 | 35.0 | 0.3  | 7.0  | 1.8  |
| chr15 | 2310069G16Rik | Upstream | Y | 44618309  | 44619308  | 2 | 69.2 | 46.5 | 47.3 | 42.3 |
| chr6  | Mrpl53        | Upstream | Y | 83058102  | 83059101  | 2 | 25.0 | 7.9  | 13.8 | 9.1  |
| chr5  | Gnai1         | Upstream | Y | 17866232  | 17867231  | 3 | 16.9 | 1.7  | 7.5  | 2.7  |
| chr6  | Pole4         | Upstream | Y | 82602860  | 82603859  | 3 | 29.6 | 11.4 | 6.2  | 1.5  |
| chr15 | Scrib         | Upstream | Y | 75900161  | 75901160  | 4 | 85.3 | 69.5 | 34.9 | 30.2 |
| chr10 | Fam26f        | Exon1    | Y | 33847197  | 33847778  | 4 | 62.4 | 46.9 | 29.9 | 25.3 |
| chr2  | Mcts2         | 5-UTR    | Y | 152512884 | 152513006 | 1 | 71.7 | 47.6 | 63.6 | 59.1 |

|       |               |                |   |           |           |    |      |      |      |      |
|-------|---------------|----------------|---|-----------|-----------|----|------|------|------|------|
| chr2  | Mcts2         | Exon1          | Y | 152512884 | 152513678 | 1  | 71.7 | 47.6 | 63.6 | 59.1 |
| chr17 | Cdc42ep3      | 5-UTR          | Y | 79734830  | 79754431  | 8  | 57.1 | 38.9 | 40.7 | 36.3 |
| chr6  | Dfna5         | Upstream       | Y | 50211769  | 50212768  | 3  | 17.9 | 0.9  | 8.9  | 4.5  |
| chr17 | 2310061I04Rik | Upstream       | Y | 36034324  | 36035323  | 4  | 57.8 | 29.6 | 13.0 | 8.7  |
| chr9  | Igdcc4        | Upstream       | Y | 64948302  | 64949301  | 4  | 72.0 | 25.7 | 32.5 | 28.2 |
| chr6  | Csgalnact2    | Upstream       | Y | 118089159 | 118090158 | 2  | 66.1 | 0.4  | 32.1 | 28.0 |
| chr3  | Lamtor5       | Upstream       | Y | 107080776 | 107081775 | 1  | 47.5 | 25.3 | 26.8 | 22.9 |
| chr11 | Krt20         | Exon1          | Y | 99299001  | 99299467  | 3  | 85.8 | 53.7 | 60.2 | 56.3 |
| chr14 | Akap11        | Upstream       | Y | 78936668  | 78937667  | 4  | 72.4 | 38.1 | 31.6 | 27.8 |
| chr5  | Rac1          | Upstream       | Y | 144288862 | 144289861 | 4  | 25.8 | 6.6  | 8.9  | 5.3  |
| chr3  | Chd1l         | Upstream       | Y | 97414114  | 97415113  | 2  | 48.1 | 12.4 | 23.0 | 19.4 |
| chr11 | Exoc7         | Upstream       | Y | 116168053 | 116169052 | 3  | 52.1 | 6.3  | 34.8 | 31.2 |
| chr11 | Olfr317       | Exon1          | Y | 58545598  | 58546725  | 2  | 89.8 | 73.7 | 73.6 | 70.2 |
| chr7  | Efcab4a       | 5-UTR          | Y | 148646993 | 148649309 | 7  | 20.5 | 5.5  | 4.4  | 1.2  |
| chr2  | Ncoa3         | Upstream       | Y | 165817137 | 165818136 | 3  | 57.6 | 37.7 | 41.7 | 38.7 |
| chr12 | Insm2         | Exon1          | Y | 56699904  | 56703004  | 12 | 54.1 | 37.2 | 8.2  | 5.5  |
| chr13 | Eil2          | Upstream       | Y | 75843932  | 75844931  | 3  | 37.8 | 14.9 | 10.8 | 8.1  |
| chr8  | Pgbd5         | 5-UTR          | Y | 126908509 | 126957836 | 5  | 74.8 | 29.2 | 22.1 | 19.5 |
| chr4  | AA415398      | Upstream       | Y | 119211375 | 119212374 | 5  | 25.5 | 8.3  | 5.4  | 2.7  |
| chr4  | Foxj3         | Upstream       | Y | 119211293 | 119212292 | 5  | 25.5 | 8.3  | 5.4  | 2.7  |
| chr7  | Eid2b         | Exon1          | Y | 29062725  | 29065148  | 5  | 95.4 | 47.1 | 26.8 | 24.3 |
| chr8  | Agpat5        | Upstream       | Y | 18845279  | 18846278  | 3  | 23.9 | 3.2  | 3.8  | 1.5  |
| chr13 | Kdm1b         | 5-UTR          | Y | 47138868  | 47143284  | 7  | 16.5 | 0.0  | 3.7  | 1.7  |
| chr13 | Nhlrc1        | Upstream       | Y | 47110220  | 47111219  | 2  | 58.5 | 37.0 | 31.1 | 29.1 |
| chr18 | Pcdhb11       | Exon1          | Y | 37581072  | 37584686  | 4  | 86.0 | 53.1 | 64.2 | 62.2 |
| chr7  | Stx4a         | Upstream       | Y | 134984322 | 134985321 | 5  | 24.9 | 7.5  | 6.9  | 5.1  |
| chr3  | Slc27a3       | Upstream       | Y | 90193850  | 90194849  | 3  | 72.0 | 48.4 | 3.5  | 1.8  |
| chr4  | Foxd2         | Exon1          | Y | 114578885 | 114581503 | 11 | 20.0 | 4.3  | 2.5  | 0.9  |
| chr10 | Txnrd1        | 5-UTR          | Y | 82296696  | 82335714  | 12 | 54.4 | 29.8 | 24.9 | 23.4 |
| chr5  | Caln1         | 5-UTR          | Y | 130845328 | 130890697 | 3  | 96.1 | 77.4 | 90.7 | 89.2 |
| chr2  | Lamc3         | Upstream       | Y | 31741801  | 31742800  | 2  | 55.2 | 18.5 | 24.8 | 23.4 |
| chr17 | Apobec2       | Upstream       | Y | 48572054  | 48573053  | 2  | 83.8 | 63.2 | 66.9 | 65.5 |
| chr8  | Coprs         | Upstream       | Y | 13890272  | 13891271  | 3  | 43.7 | 25.3 | 16.9 | 15.5 |
| chr16 |               | 5-Sep Upstream | Y | 18630032  | 18631031  | 4  | 45.7 | 4.8  | 10.3 | 9.0  |
| chr17 | Rab31         | Upstream       | Y | 66122093  | 66123092  | 2  | 19.4 | 1.6  | 1.4  | 0.2  |
| chr15 | Pacsin2       | Upstream       | Y | 83295037  | 83296036  | 3  | 42.5 | 26.4 | 27.4 | 26.3 |
| chr10 | Gipc3         | Upstream       | Y | 80806012  | 80807011  | 3  | 53.8 | 22.7 | 2.5  | 1.5  |
| chr11 | Hoxb5         | 5-UTR          | Y | 96164826  | 96164927  | 1  | 28.0 | 12.6 | 23.4 | 22.4 |
| chr9  | Klhl40        | Exon1          | Y | 121686725 | 121688045 | 7  | 75.9 | 53.3 | 33.4 | 32.4 |
| chr12 | Atg2b         | Upstream       | Y | 106923452 | 106924451 | 5  | 24.8 | 9.3  | 4.6  | 3.6  |
| chr9  | Csk           | Upstream       | Y | 57492988  | 57493987  | 5  | 68.2 | 31.5 | 15.7 | 14.8 |
| chr16 | Ppl           | Upstream       | Y | 5132575   | 5133574   | 4  | 45.2 | 23.1 | 25.3 | 24.4 |
| chr1  | Dis3l2        | Upstream       | Y | 88599379  | 88600378  | 3  | 39.3 | 9.2  | 8.8  | 7.9  |
| chr1  | Sned1         | Upstream       | Y | 95131474  | 95132473  | 3  | 76.9 | 3.1  | 1.7  | 0.9  |
| chr6  | Wdr54         | Upstream       | Y | 83106374  | 83107373  | 3  | 23.5 | 4.2  | 8.1  | 7.3  |
| chr8  | Jph3          | Exon1          | Y | 124276867 | 124277644 | 4  | 65.0 | 39.3 | 51.4 | 50.7 |
| chr17 | Fem1a         | Exon1          | Y | 56396216  | 56403031  | 7  | 45.2 | 18.9 | 17.1 | 16.4 |
| chr11 | Tbc1d16       | 5-UTR          | Y | 119071997 | 119089813 | 9  | 93.0 | 42.7 | 23.4 | 22.7 |
| chr9  | Cmc1          | Upstream       | Y | 118059315 | 118060314 | 2  | 32.6 | 15.1 | 14.4 | 13.7 |

|       |               |          |   |           |           |    |      |      |      |      |
|-------|---------------|----------|---|-----------|-----------|----|------|------|------|------|
| chr1  | Pigm          | Exon1    | Y | 174306662 | 174314230 | 6  | 56.6 | 16.4 | 11.7 | 11.2 |
| chr9  | Nckipsd       | Upstream | Y | 108709711 | 108710710 | 3  | 56.1 | 24.6 | 22.9 | 22.4 |
| chr9  | 2410012M07Rik | Upstream | Y | 98764186  | 98765185  | 1  | 40.9 | 20.0 | 42.2 | 41.9 |
| chr8  | Mfap3l        | 5-UTR    | Y | 63111657  | 63135388  | 6  | 93.3 | 62.3 | 30.9 | 30.7 |
| chr13 | Arhgef28      | 5-UTR    | Y | 98915540  | 98976120  | 5  | 83.9 | 38.9 | 33.0 | 32.9 |
| chr8  | 4930432K21Rik | 5-UTR    | Y | 86671937  | 86672756  | 3  | 75.4 | 44.4 | 42.9 | 42.8 |
| chr8  | 4930432K21Rik | Exon1    | Y | 86671937  | 86672297  | 3  | 75.4 | 44.4 | 42.9 | 42.8 |
| chr5  | Nptx2         | Upstream | Y | 145305756 | 145306755 | 4  | 42.1 | 24.9 | 21.2 | 21.2 |
| chr11 | Smcr7         | 5-UTR    | Y | 60541900  | 60543790  | 4  | 26.0 | 9.1  | 3.8  | 3.9  |
| chr18 | Adrb2         | Upstream | Y | 62339636  | 62340635  | 4  | 47.6 | 19.2 | 9.0  | 9.2  |
| chr8  | Cc2d1a        | Upstream | Y | 86671653  | 86672652  | 5  | 75.4 | 33.4 | 25.8 | 25.9 |
| chr5  | Amz1          | 5-UTR    | Y | 141200081 | 141217237 | 5  | 95.3 | 47.6 | 23.5 | 23.7 |
| chr17 | Mrps34        | Upstream | Y | 25031065  | 25032064  | 4  | 18.8 | 0.0  | 2.2  | 2.4  |
| chr17 | Ubxn6         | Upstream | Y | 56214413  | 56215412  | 2  | 28.6 | 12.0 | 16.3 | 16.5 |
| chr7  | Dhx32         | 5-UTR    | Y | 140951386 | 140968486 | 8  | 93.3 | 62.2 | 27.3 | 27.6 |
| chr4  | Mdn1          | Upstream | Y | 32743094  | 32744093  | 3  | 21.6 | 0.1  | 0.2  | 0.5  |
| chr10 | Dapk3         | Upstream | Y | 80644752  | 80645751  | 3  | 49.8 | 15.9 | 13.5 | 13.8 |
| chr10 | Aes           | Upstream | Y | 81021189  | 81022188  | 3  | 16.7 | 1.7  | 2.2  | 2.6  |
| chr8  | Cln8          | 5-UTR    | Y | 14888536  | 14894687  | 7  | 46.9 | 1.0  | 27.3 | 27.6 |
| chr12 | Itpk1         | Upstream | Y | 103943080 | 103944079 | 5  | 36.8 | 15.8 | 7.2  | 7.5  |
| chr17 | 2810468N07Rik | Upstream | Y | 25706756  | 25707755  | 5  | 44.1 | 0.0  | 13.5 | 14.0 |
| chr13 | Elmo1         | 5-UTR    | Y | 20182376  | 20277295  | 8  | 87.6 | 48.6 | 13.9 | 14.4 |
| chr1  | Ankzf1        | Upstream | Y | 75187734  | 75188733  | 5  | 47.6 | 25.9 | 12.6 | 13.2 |
| chr7  | Nfkbid        | Upstream | Y | 31207323  | 31208322  | 5  | 41.7 | 21.1 | 0.3  | 0.9  |
| chr6  | Wnt5b         | 5-UTR    | Y | 119398234 | 119494365 | 23 | 21.7 | 4.8  | 2.8  | 3.5  |
| chr1  | Slco5a1       | Exon1    | Y | 12979661  | 12981216  | 6  | 56.7 | 24.9 | 20.0 | 20.6 |
| chr6  | Rad18         | Upstream | Y | 112646665 | 112647664 | 2  | 24.3 | 0.7  | 0.4  | 1.1  |
| chr8  | Dda1          | Upstream | Y | 73992093  | 73993092  | 2  | 44.4 | 21.3 | 14.3 | 15.0 |
| chr2  | Prrc2b        | Upstream | Y | 32005668  | 32006667  | 4  | 21.3 | 0.4  | 1.3  | 2.0  |
| chr1  | Paqr8         | 5-UTR    | Y | 20880703  | 20924704  | 7  | 24.3 | 0.9  | 15.9 | 16.7 |
| chr7  | Lrfr3         | 5-UTR    | Y | 31145818  | 31147791  | 2  | 88.0 | 55.6 | 57.4 | 58.2 |
| chr11 | Cdk5r1        | Exon1    | Y | 80290548  | 80294681  | 6  | 86.4 | 34.1 | 23.4 | 24.3 |
| chr7  | Tsku          | 5-UTR    | Y | 105501633 | 105509838 | 9  | 40.4 | 18.8 | 5.6  | 6.6  |
| chr7  | Mef2a         | Upstream | Y | 74517745  | 74518744  | 5  | 18.2 | 0.3  | 4.5  | 5.6  |
| chr5  | Mtus2         | 5-UTR    | Y | 148768896 | 148887974 | 6  | 48.5 | 11.5 | 14.9 | 16.0 |
| chr15 | Zfp623        | 5-UTR    | Y | 75771382  | 75777626  | 5  | 22.9 | 1.0  | 3.7  | 4.8  |
| chr6  | Wnt7a         | Upstream | Y | 91361364  | 91362363  | 5  | 55.7 | 30.7 | 29.0 | 30.2 |
| chr10 | BC048403      | Upstream | Y | 121175993 | 121176992 | 3  | 39.5 | 16.8 | 10.5 | 11.8 |
| chr15 | Trmt12        | Exon1    | Y | 58704204  | 58708336  | 5  | 40.9 | 21.5 | 15.6 | 16.9 |
| chr19 | Erlin1        | Upstream | Y | 44144276  | 44145275  | 3  | 64.1 | 32.5 | 20.9 | 22.3 |
| chr5  | Rgs12         | 5-UTR    | Y | 35292097  | 35307523  | 4  | 37.2 | 2.4  | 1.5  | 2.9  |
| chr7  | Zfp536        | 5-UTR    | Y | 38355009  | 38554771  | 13 | 24.2 | 1.5  | 30.9 | 32.4 |
| chr16 | B3galt5       | 5-UTR    | Y | 96457408  | 96536775  | 5  | 86.8 | 50.8 | 22.3 | 23.8 |
| chr13 | Nhlrc1        | Exon1    | Y | 47107926  | 47110219  | 6  | 72.6 | 37.2 | 26.0 | 27.8 |
| chr16 | Hmox2         | 5-UTR    | Y | 4726361   | 4762594   | 7  | 24.4 | 1.2  | 3.8  | 5.6  |
| chr1  | Atg9a         | 5-UTR    | Y | 75186980  | 75188497  | 4  | 47.6 | 25.9 | 15.6 | 17.5 |
| chr6  | Vopp1         | Upstream | Y | 57775120  | 57776119  | 3  | 77.9 | 43.4 | 0.3  | 2.6  |
| chr8  | Afg3l1        | Upstream | Y | 126000762 | 126001761 | 4  | 33.7 | 13.8 | 9.0  | 11.4 |
| chr8  | Thap11        | Exon1    | Y | 108379003 | 108380850 | 7  | 32.3 | 14.9 | 3.2  | 5.7  |

|       |               |          |   |           |           |    |      |      |      |      |
|-------|---------------|----------|---|-----------|-----------|----|------|------|------|------|
| chr13 | Nkd2          | Upstream | Y | 73985080  | 73986079  | 3  | 58.7 | 42.6 | 26.3 | 28.8 |
| chr1  | Cryba2        | Upstream | Y | 74939710  | 74940709  | 3  | 32.0 | 16.8 | 9.0  | 11.6 |
| chr15 | Pdpx          | Upstream | Y | 78743349  | 78744348  | 4  | 43.9 | 16.1 | 33.3 | 35.9 |
| chr13 | 4833422C13Rik | 5-UTR    | Y | 91881027  | 91881477  | 3  | 20.0 | 3.3  | 4.6  | 7.2  |
| chr19 | Dagla         | 5-UTR    | Y | 10346079  | 10379367  | 6  | 63.2 | 40.4 | 15.7 | 18.6 |
| chr13 | Rnf144b       | 5-UTR    | Y | 47218089  | 47302754  | 9  | 85.6 | 36.6 | 19.8 | 22.8 |
| chr4  | Zbtb48        | Upstream | Y | 151401781 | 151402780 | 4  | 29.3 | 13.1 | 6.1  | 9.2  |
| chr13 | Gprin1        | 5-UTR    | Y | 54841821  | 54851030  | 5  | 64.6 | 37.2 | 32.5 | 35.6 |
| chr18 | Pcdhac1       | Exon1    | Y | 37249790  | 37252225  | 4  | 53.8 | 36.4 | 39.3 | 42.6 |
| chr11 | Dlx4          | Upstream | Y | 95007116  | 95008115  | 4  | 23.5 | 1.0  | 15.4 | 18.7 |
| chr18 | Cxxc5         | 5-UTR    | Y | 35989472  | 36018201  | 20 | 25.1 | 6.9  | 21.2 | 24.6 |
| chr7  | Clns1a        | Upstream | Y | 104844167 | 104845166 | 3  | 74.3 | 38.9 | 34.0 | 37.6 |
| chr5  | Ythdc1        | Upstream | Y | 87232515  | 87233514  | 3  | 17.2 | 0.3  | 4.5  | 8.2  |
| chr18 | Kcng2         | 5-UTR    | Y | 80519875  | 80560993  | 12 | 66.8 | 51.8 | 28.9 | 32.6 |
| chr9  | Ttc12         | Upstream | Y | 49294331  | 49295330  | 2  | 27.4 | 8.3  | 13.3 | 17.1 |
| chr5  | Gltf          | Upstream | Y | 115140945 | 115141944 | 4  | 76.0 | 30.4 | 22.1 | 25.8 |
| chr16 | Thpo          | 5-UTR    | Y | 20729150  | 20734584  | 14 | 61.5 | 46.1 | 24.8 | 28.7 |
| chr6  | Fbln2         | Exon1    | Y | 91183057  | 91184345  | 4  | 89.1 | 57.0 | 64.6 | 68.6 |
| chr15 | Mtss1         | Upstream | Y | 58913582  | 58914581  | 4  | 21.3 | 1.7  | 3.5  | 7.4  |
| chr17 | Tbc1d24       | 5-UTR    | Y | 24323114  | 24342507  | 4  | 31.6 | 7.5  | 13.6 | 17.6 |
| chr7  | Chid1         | Upstream | Y | 148725757 | 148726756 | 3  | 56.3 | 18.8 | 18.6 | 22.7 |
| chr9  | Dock3         | Upstream | Y | 107134241 | 107135240 | 3  | 57.8 | 22.8 | 54.8 | 58.8 |
| chr19 | Dock8         | Upstream | Y | 25073019  | 25074018  | 4  | 65.8 | 47.5 | 20.3 | 24.3 |
| chr2  | Epb4.111      | 5-UTR    | Y | 156246788 | 156319653 | 14 | 66.8 | 48.3 | 13.6 | 17.6 |
| chr17 | Nrxn1         | 5-UTR    | Y | 91488067  | 91492142  | 4  | 44.7 | 5.3  | 51.4 | 55.7 |
| chr3  | Rarres1       | Upstream | Y | 67319446  | 67320445  | 2  | 56.0 | 22.9 | 23.3 | 27.7 |
| chr10 | Fam211b       | Upstream | Y | 75023076  | 75024075  | 3  | 30.0 | 2.8  | 26.9 | 31.4 |
| chr11 | Rara          | 5-UTR    | Y | 98799010  | 98811931  | 7  | 67.4 | 49.6 | 19.6 | 24.1 |
| chr15 | Kctd17        | Upstream | Y | 78258058  | 78259057  | 2  | 84.3 | 45.9 | 44.6 | 49.1 |
| chr5  | Chst12        | 5-UTR    | Y | 140981563 | 140999573 | 5  | 44.8 | 28.6 | 18.3 | 22.9 |
| chr11 | Foxi1         | Exon1    | Y | 34107468  | 34108089  | 4  | 85.3 | 58.6 | 63.9 | 69.0 |
| chr17 | Fkbp5         | Upstream | Y | 28623095  | 28624094  | 3  | 31.0 | 3.7  | 19.2 | 24.4 |
| chr4  | Bach2         | 5-UTR    | Y | 32504410  | 32588599  | 2  | 46.3 | 28.6 | 26.6 | 31.8 |
| chr9  | Prss50        | Upstream | Y | 110759471 | 110760470 | 2  | 62.5 | 45.9 | 39.3 | 44.9 |
| chr12 | Tmem121       | Upstream | Y | 114423114 | 114424113 | 4  | 37.6 | 14.2 | 24.2 | 30.1 |
| chr8  | Plekhg4       | Upstream | Y | 107898281 | 107899280 | 4  | 94.1 | 71.2 | 51.6 | 57.5 |
| chr2  | Ppp1r3d       | Exon1    | Y | 178145911 | 178149168 | 7  | 68.3 | 41.1 | 25.2 | 31.3 |
| chr6  | H1fx          | Upstream | Y | 87931477  | 87932476  | 5  | 27.3 | 11.9 | 3.9  | 10.1 |
| chr11 | Wscd1         | 5-UTR    | Y | 71564205  | 71573350  | 6  | 26.9 | 2.8  | 4.0  | 10.4 |
| chr11 | Grb10         | 5-UTR    | Y | 11870620  | 11937423  | 15 | 66.6 | 45.1 | 39.5 | 46.3 |
| chr10 | Celf5         | Upstream | Y | 80945455  | 80946454  | 2  | 55.6 | 27.4 | 23.9 | 30.7 |
| chr11 | Nsf           | Upstream | Y | 103815371 | 103816370 | 2  | 25.0 | 1.2  | 9.6  | 16.5 |
| chr11 | Mafg          | Upstream | Y | 120494862 | 120495861 | 4  | 53.1 | 18.9 | 17.3 | 24.3 |
| chr18 | Mapk4         | 5-UTR    | Y | 74130091  | 74224603  | 8  | 31.0 | 2.3  | 11.8 | 18.9 |
| chr4  | Tmem215       | 5-UTR    | Y | 40419213  | 40420957  | 6  | 18.4 | 1.4  | 6.3  | 14.1 |
| chr4  | Tmem215       | Exon1    | Y | 40419213  | 40420637  | 6  | 18.4 | 1.4  | 6.3  | 14.1 |
| chr6  | Slc35b4       | Upstream | Y | 34127055  | 34128054  | 2  | 20.3 | 0.0  | 0.7  | 8.5  |
| chr2  | Hoxd12        | Upstream | Y | 74512070  | 74513069  | 2  | 26.6 | 5.0  | 14.3 | 22.4 |
| chr1  | Agap1         | Upstream | Y | 91350386  | 91351385  | 5  | 71.4 | 30.1 | 10.0 | 18.6 |

|       |         |          |   |           |           |   |      |      |      |      |
|-------|---------|----------|---|-----------|-----------|---|------|------|------|------|
| chr17 | Tbc1d5  | Upstream | Y | 51318675  | 51319674  | 3 | 45.0 | 7.2  | 0.5  | 9.2  |
| chr14 | Dzip1   | Upstream | Y | 119322390 | 119323389 | 2 | 76.8 | 56.0 | 52.8 | 61.5 |
| chr2  | Nr4a2   | Upstream | Y | 56976415  | 56977414  | 4 | 52.1 | 29.4 | 16.8 | 26.2 |
| chr11 | Col1a1  | Exon1    | Y | 94797584  | 94797758  | 2 | 83.0 | 65.1 | 46.6 | 56.1 |
| chr4  | Slc46a2 | Exon1    | Y | 59926662  | 59927928  | 5 | 83.1 | 61.1 | 31.4 | 41.1 |
| chr5  | Steap4  | 5-UTR    | Y | 7960472   | 7975440   | 3 | 0.0  | 0.4  | 33.6 | 1.0  |
| chr13 | Ninj1   | Upstream | Y | 49281916  | 49282915  | 4 | 0.0  | 1.2  | 27.1 | 1.1  |
| chr7  | Zkscan2 | 5-UTR    | Y | 130643482 | 130643963 | 2 | 13.6 | 12.1 | 39.0 | 18.9 |
| chr9  | Eepd1   | Upstream | Y | 25288182  | 25289181  | 2 | 61.5 | 71.4 | 77.1 | 60.7 |

**Group 4-mDMR genes associated with methylation loss at gene body and 3' CGI**

| Chr   | Gene          | Region    | CGI | Start     | End       | #Bins | DNA Methylation Level (%) |      |             |      |
|-------|---------------|-----------|-----|-----------|-----------|-------|---------------------------|------|-------------|------|
|       |               |           |     |           |           |       | ISCs                      |      | Diff. Cells |      |
|       |               |           |     |           |           |       | P0                        | P21  | P0          | P21  |
| chr2  | St6galnac4    | Intron5   | Y   | 32451322  | 32452533  | 1     | 74.2                      | 58.8 | 84.9        | 25.3 |
| chr13 | Cltb          | Exon2     | Y   | 54700405  | 54700522  | 1     | 77.8                      | 23.1 | 63.1        | 15.2 |
| chr13 | Itga2         | Intron28  | Y   | 115676898 | 115690622 | 3     | 61.5                      | 3.2  | 49.6        | 3.2  |
| chr7  | Nlrp6         | Intron1   | Y   | 148106986 | 148107539 | 1     | 19.0                      | 1.6  | 44.8        | 0.0  |
| chr6  | 2310001H17Rik | Intron2   | Y   | 129183172 | 129187756 | 3     | 55.8                      | 24.6 | 65.6        | 21.3 |
| chr6  | Lpar5         | Intron1   | Y   | 125017995 | 125031154 | 2     | 61.3                      | 10.2 | 77.0        | 34.7 |
| chr6  | Cand2         | Exon9     | Y   | 115741687 | 115743189 | 6     | 91.7                      | 41.7 | 85.5        | 45.1 |
| chr9  | Mir191        | Downstre: | Y   | 108470724 | 108471723 | 3     | 51.9                      | 9.7  | 55.1        | 17.9 |
| chr13 | Cltb          | Intron3   | Y   | 54700523  | 54708004  | 1     | 77.4                      | 41.4 | 80.8        | 43.8 |
| chr5  | Setd8         | Intron5   | Y   | 124901383 | 124907067 | 3     | 84.9                      | 34.7 | 70.8        | 33.9 |
| chr8  | 3010033K07Rik | Intron1   | Y   | 111077524 | 111108055 | 2     | 79.6                      | 63.2 | 85.7        | 50.1 |
| chr9  | Celsr3        | Intron24  | Y   | 108745632 | 108745874 | 1     | 37.5                      | 15.4 | 42.3        | 7.8  |
| chr17 | Tmem151b      | Intron1   | Y   | 45682904  | 45683709  | 3     | 55.1                      | 33.7 | 61.2        | 27.6 |
| chr7  | Lipt2         | LastExon  | Y   | 107308684 | 107309441 | 1     | 54.8                      | 33.1 | 67.8        | 36.3 |
| chr11 | Hoxb4         | 3-UTR     | Y   | 96181643  | 96182952  | 4     | 48.3                      | 19.4 | 57.1        | 28.8 |
| chr16 | Htr1f         | Intron2   | Y   | 65074056  | 65105450  | 2     | 59.3                      | 26.6 | 53.9        | 25.9 |
| chr18 | Proc          | Intron8   | Y   | 32295606  | 32299163  | 1     | 65.0                      | 15.2 | 37.8        | 10.4 |
| chr12 | Cdc42bpb      | Intron36  | Y   | 112583835 | 112615307 | 5     | 22.3                      | 6.8  | 31.4        | 5.2  |
| chr9  | Mir425        | Downstre: | Y   | 108471193 | 108472192 | 3     | 34.9                      | 1.2  | 33.3        | 8.1  |
| chr15 | Srebf2        | Intron2   | Y   | 82000585  | 82001531  | 1     | 64.8                      | 16.9 | 54.2        | 29.5 |
| chr11 | Nek8          | Intron7   | Y   | 77982951  | 77983879  | 1     | 29.2                      | 1.2  | 24.4        | 0.6  |
| chr19 | Pkd2l1        | Downstre: | Y   | 44221127  | 44222126  | 2     | 33.6                      | 10.3 | 35.9        | 12.6 |
| chr16 | Ephb3         | Intron3   | Y   | 21215071  | 21217268  | 1     | 25.6                      | 3.0  | 28.2        | 5.5  |
| chr10 | Tcf3          | Intron3   | Y   | 79876083  | 79877906  | 1     | 90.9                      | 75.0 | 76.5        | 54.1 |
| chr2  | Tgm2          | Intron12  | Y   | 157968911 | 157972026 | 2     | 72.7                      | 0.0  | 42.7        | 20.3 |
| chr11 | Fbf1          | Intron5   | Y   | 116007326 | 116007749 | 1     | 95.2                      | 59.5 | 88.4        | 66.3 |
| chr8  | 4930567H12Rik | Intron2   | Y   | 128109075 | 128140001 | 3     | 49.1                      | 28.9 | 49.2        | 27.3 |
| chr2  | Cep250        | Exon28    | Y   | 155815952 | 155818510 | 3     | 41.8                      | 26.7 | 47.1        | 25.5 |
| chr10 | lpmk          | LastExon  | Y   | 70843953  | 70848633  | 3     | 47.0                      | 12.1 | 29.6        | 8.4  |
| chr7  | Kcnq1         | Intron1   | Y   | 150293647 | 150335402 | 2     | 21.5                      | 4.7  | 22.1        | 1.5  |
| chr15 | Myc           | LastExon  | Y   | 61820901  | 61821916  | 2     | 80.9                      | 56.9 | 78.9        | 58.7 |
| chr15 | Panx2         | Intron1   | Y   | 88890730  | 88897987  | 4     | 37.1                      | 7.5  | 25.0        | 5.3  |
| chr9  | 1810026J23Rik | 3-UTR     | Y   | 21398283  | 21400414  | 1     | 54.1                      | 24.2 | 53.3        | 33.7 |
| chr11 | Hoxb4         | LastExon  | Y   | 96181344  | 96182952  | 5     | 48.3                      | 13.2 | 39.7        | 20.4 |
| chr11 | Hoxb5         | Intron1   | Y   | 96165490  | 96166203  | 2     | 67.6                      | 39.5 | 57.3        | 38.5 |

|       |               |           |   |           |           |   |       |      |      |      |
|-------|---------------|-----------|---|-----------|-----------|---|-------|------|------|------|
| chr16 | Alg1          | Intron1   | Y | 5233951   | 5235058   | 2 | 40.0  | 7.8  | 19.5 | 1.2  |
| chr7  | Lmtk3         | Intron12  | Y | 53050932  | 53053568  | 4 | 24.2  | 7.0  | 22.7 | 5.0  |
| chr11 | Sfi1          | Intron2   | Y | 3032331   | 3032889   | 4 | 72.6  | 55.6 | 72.4 | 54.8 |
| chr12 | 6030440G07Rik | Intron1   | Y | 112232918 | 112251099 | 2 | 50.7  | 14.8 | 23.5 | 6.6  |
| chr10 | Zc3h12d       | Intron3   | Y | 7573126   | 7582183   | 1 | 79.0  | 59.0 | 80.5 | 63.6 |
| chr11 | Kdm6b         | Intron7   | Y | 69215166  | 69215260  | 1 | 66.1  | 36.0 | 63.7 | 47.1 |
| chr14 | Gjb2          | Intron1   | Y | 57719609  | 57723305  | 6 | 33.7  | 8.3  | 23.2 | 7.1  |
| chr1  | Tor3a         | Intron3   | Y | 158596909 | 158599501 | 2 | 67.5  | 36.8 | 56.1 | 40.1 |
| chr11 | Hoxb6         | Intron1   | Y | 96160906  | 96161982  | 4 | 42.8  | 18.1 | 43.1 | 27.6 |
| chr11 | Hoxb7         | LastExon  | Y | 96150691  | 96151477  | 2 | 71.5  | 30.2 | 54.4 | 39.1 |
| chr8  | Snai3         | Intron2   | Y | 124980629 | 124984438 | 2 | 52.7  | 0.0  | 23.4 | 8.2  |
| chr11 | Mpo           | Intron12  | Y | 87616252  | 87616899  | 1 | 43.4  | 26.7 | 45.0 | 30.2 |
| chr7  | Hirip3        | Exon2     | Y | 134006332 | 134006440 | 1 | 25.0  | 8.3  | 21.4 | 6.8  |
| chr11 | Sfi1          | Exon17    | Y | 3045244   | 3045325   | 1 | 50.4  | 32.7 | 49.4 | 34.9 |
| chr11 | Acsf2         | Intron15  | Y | 94434543  | 94462956  | 2 | 36.4  | 11.1 | 21.2 | 7.0  |
| chr7  | Trpm4         | Exon12    | Y | 52572376  | 52572505  | 1 | 85.9  | 69.1 | 86.6 | 72.6 |
| chr2  | Zfp385b       | Intron7   | Y | 77341740  | 77557507  | 2 | 85.9  | 62.1 | 82.5 | 69.1 |
| chr1  | Gpa33         | Intron1   | Y | 168060736 | 168076769 | 2 | 48.2  | 32.1 | 40.4 | 26.9 |
| chr5  | 6030443J06Rik | Intron1   | Y | 22056291  | 22059576  | 3 | 96.9  | 47.0 | 62.7 | 49.4 |
| chr8  | Kcnk1         | Intron1   | Y | 128519715 | 128548911 | 6 | 58.3  | 35.0 | 30.2 | 17.1 |
| chr11 | Hoxb6         | LastExon  | Y | 96161983  | 96162883  | 3 | 53.3  | 26.6 | 49.4 | 36.6 |
| chr19 | Banf1         | Intron1   | Y | 5365159   | 5365817   | 2 | 34.1  | 8.0  | 17.9 | 5.2  |
| chr10 | Btbd11        | Intron3   | Y | 85024455  | 85061469  | 5 | 20.9  | 0.0  | 24.0 | 11.3 |
| chr2  | St6galnac6    | Intron2   | Y | 32467924  | 32470300  | 2 | 100.0 | 49.7 | 65.1 | 52.7 |
| chr6  | Plxdn1        | Intron35  | Y | 115930773 | 115943506 | 3 | 18.2  | 2.0  | 19.3 | 6.9  |
| chr17 | Neu1          | Intron2   | Y | 35069054  | 35069510  | 1 | 29.3  | 10.6 | 32.8 | 20.4 |
| chr11 | Kdm6b         | Exon5     | Y | 69214765  | 69214879  | 1 | 28.5  | 9.8  | 20.2 | 8.2  |
| chr5  | Pkd2          | Intron3   | Y | 104906196 | 104907809 | 1 | 91.7  | 69.0 | 87.8 | 76.1 |
| chr17 | Srrm2         | Intron1   | Y | 23940366  | 23945032  | 7 | 31.9  | 13.3 | 22.2 | 11.0 |
| chr7  | Zfp580        | 3-UTR     | Y | 5004938   | 5005325   | 2 | 20.7  | 2.2  | 24.6 | 13.5 |
| chr11 | Hoxb6         | 3-UTR     | Y | 96162243  | 96162883  | 2 | 63.9  | 34.2 | 50.2 | 39.1 |
| chr10 | Spatc1l       | LastExon  | Y | 76032411  | 76032945  | 3 | 69.6  | 25.7 | 31.4 | 20.3 |
| chr11 | Sfi1          | Exon27    | Y | 3077430   | 3077524   | 1 | 78.5  | 52.1 | 73.9 | 62.9 |
| chr17 | Wdr46         | Exon3     | Y | 34078351  | 34078463  | 1 | 32.2  | 16.9 | 27.7 | 16.9 |
| chr11 | Gm12216       | Intron3   | Y | 53663613  | 53672614  | 2 | 62.4  | 27.0 | 27.4 | 16.5 |
| chr2  | Pxmp4         | Intron3   | Y | 154422001 | 154429252 | 1 | 18.6  | 0.5  | 13.4 | 2.8  |
| chr2  | Rin2          | Exon8     | Y | 145685750 | 145686910 | 5 | 28.7  | 4.5  | 12.9 | 2.4  |
| chr13 | Cltb          | Intron2   | Y | 54700195  | 54700404  | 1 | 26.8  | 2.3  | 12.0 | 1.7  |
| chr10 | Cpm           | Intron2   | Y | 117066940 | 117096823 | 3 | 41.9  | 24.2 | 38.4 | 28.3 |
| chr19 | Pik3ap1       | Intron16  | Y | 41450756  | 41459446  | 3 | 78.6  | 3.8  | 35.2 | 25.3 |
| chr17 | Clip4         | Intron1   | Y | 72119251  | 72139207  | 8 | 66.8  | 35.8 | 34.2 | 24.4 |
| chr18 | Fam69c        | Exon2     | Y | 84899422  | 84900081  | 3 | 28.0  | 6.3  | 47.7 | 38.1 |
| chr15 | Gramd4        | 3-UTR     | Y | 85965885  | 85968066  | 2 | 76.2  | 55.8 | 50.5 | 41.1 |
| chr15 | Gramd4        | LastExon  | Y | 85965780  | 85968066  | 3 | 76.2  | 55.8 | 50.5 | 41.1 |
| chr4  | Foxd2         | 3-UTR     | Y | 114578885 | 114579947 | 2 | 20.0  | 4.3  | 10.5 | 1.4  |
| chr12 | Insm2         | 3-UTR     | Y | 56701942  | 56703004  | 2 | 54.1  | 37.2 | 41.5 | 32.4 |
| chr19 | E030044B06Rik | Intron1   | Y | 40942931  | 40950788  | 5 | 81.0  | 23.1 | 21.8 | 12.9 |
| chr8  | 4931428F04Rik | Downstre: | Y | 107803309 | 107804308 | 2 | 60.7  | 26.8 | 61.5 | 52.7 |
| chr8  | Nol3          | Exon2     | Y | 107803316 | 107803675 | 2 | 60.7  | 26.8 | 61.5 | 52.7 |

|       |               |           |   |           |           |   |      |      |      |      |
|-------|---------------|-----------|---|-----------|-----------|---|------|------|------|------|
| chr13 | Isl1          | Intron2   | Y | 117091987 | 117093253 | 1 | 73.0 | 41.9 | 53.2 | 44.4 |
| chr15 | Lima1         | Intron10  | Y | 99674255  | 99705763  | 4 | 35.9 | 7.3  | 29.5 | 20.8 |
| chr2  | Rapgef4       | Intron1   | Y | 71819409  | 71869089  | 5 | 52.0 | 33.9 | 41.0 | 32.4 |
| chr17 | Atat1         | Intron1   | Y | 36034861  | 36035201  | 2 | 57.8 | 29.6 | 25.9 | 17.3 |
| chr13 | Ero1lb        | Intron1   | Y | 12658446  | 12667086  | 3 | 58.5 | 21.2 | 29.4 | 21.0 |
| chr2  | 4930526D03Rik | 3-UTR     | Y | 181431500 | 181431574 | 1 | 79.2 | 63.0 | 75.0 | 66.7 |
| chr14 | Dupd1         | Intron2   | Y | 22506058  | 22522101  | 2 | 96.7 | 55.1 | 54.9 | 46.6 |
| chr11 | Abi3          | Exon2     | Y | 95694954  | 95695114  | 1 | 23.5 | 5.2  | 18.2 | 10.0 |
| chr6  | Casc1         | Intron7   | Y | 145134413 | 145139877 | 3 | 70.0 | 48.4 | 64.2 | 56.0 |
| chr19 | Sh3pxd2a      | Intron7   | Y | 47361209  | 47388524  | 4 | 96.0 | 45.7 | 75.2 | 67.1 |
| chr7  | Lgals7        | Downstre: | Y | 29651304  | 29652303  | 2 | 46.6 | 20.0 | 53.1 | 45.0 |
| chr17 | Neu1          | Intron4   | Y | 35071131  | 35071227  | 1 | 64.8 | 42.6 | 67.9 | 59.9 |
| chr4  | Pex14         | Intron8   | Y | 148450177 | 148473880 | 5 | 76.9 | 22.5 | 28.0 | 20.5 |
| chr2  | Gm14164       | Intron1   | Y | 152171463 | 152187534 | 2 | 90.6 | 70.0 | 72.0 | 64.4 |
| chr5  | Foxk1         | Intron2   | Y | 142911281 | 142924640 | 3 | 39.0 | 13.8 | 26.1 | 18.7 |
| chr2  | Tmem210       | Downstre: | Y | 25144708  | 25145707  | 3 | 33.3 | 0.3  | 7.7  | 0.3  |
| chr14 | Shisa2        | Intron1   | Y | 60245238  | 60248471  | 4 | 74.6 | 26.4 | 31.8 | 24.5 |
| chr7  | Setd1a        | Exon17    | Y | 134942605 | 134942742 | 1 | 88.0 | 72.0 | 84.6 | 77.4 |
| chr15 | Tbc1d22a      | Intron1   | Y | 86045067  | 86065159  | 3 | 25.6 | 5.1  | 10.4 | 3.2  |
| chr7  | Arrb1         | Intron1   | Y | 106684309 | 106730770 | 4 | 24.4 | 4.5  | 15.5 | 8.4  |
| chr8  | Zfp276        | Intron1   | Y | 125778824 | 125779606 | 3 | 56.3 | 39.4 | 22.0 | 14.9 |
| chr1  | Ppfia4        | LastExon  | Y | 136193360 | 136195405 | 3 | 39.1 | 22.9 | 44.9 | 37.8 |
| chr11 | Slc5a10       | Intron6   | Y | 61492159  | 61517752  | 8 | 41.2 | 12.1 | 13.6 | 6.8  |
| chr9  | Lamb2         | LastExon  | Y | 108392615 | 108392861 | 2 | 29.2 | 12.4 | 18.1 | 11.5 |
| chr7  | Kcnk6         | 3-UTR     | Y | 30006947  | 30010054  | 1 | 18.4 | 0.0  | 18.0 | 11.5 |
| chr7  | Ube2m         | Downstre: | Y | 13619469  | 13620468  | 5 | 23.8 | 0.7  | 7.7  | 1.3  |
| chr2  | Dhrs9         | Intron1   | Y | 69218689  | 69230908  | 2 | 33.2 | 9.6  | 16.1 | 9.7  |
| chr18 | St8sia5       | LastExon  | Y | 77493105  | 77494189  | 3 | 61.8 | 41.0 | 42.6 | 36.3 |
| chr17 | Cdc42ep3      | Intron1   | Y | 79735057  | 79754156  | 7 | 57.1 | 38.9 | 47.4 | 41.4 |
| chr4  | Zc3h12a       | Intron5   | Y | 124804327 | 124805010 | 4 | 22.5 | 1.0  | 7.0  | 1.3  |
| chr2  | Pabpc1l       | Intron1   | Y | 163851410 | 163853210 | 1 | 96.6 | 69.0 | 86.0 | 80.4 |
| chr5  | A930011G23Rik | Intron2   | Y | 99806195  | 99987910  | 3 | 62.0 | 36.9 | 49.4 | 44.0 |
| chr1  | Bend6         | Intron6   | Y | 33940494  | 33964410  | 5 | 34.9 | 3.0  | 7.9  | 2.6  |
| chr6  | Gsg1          | LastExon  | Y | 135187348 | 135187763 | 3 | 72.5 | 53.0 | 74.2 | 69.0 |
| chr4  | Gpr153        | 3-UTR     | Y | 151657699 | 151659446 | 3 | 57.1 | 30.4 | 31.8 | 26.6 |
| chr1  | Ppfia4        | 3-UTR     | Y | 136193360 | 136195654 | 4 | 39.1 | 22.9 | 34.0 | 28.8 |
| chr19 | Mlana         | Intron2   | Y | 29774661  | 29779109  | 1 | 98.6 | 83.3 | 97.6 | 92.6 |
| chr11 | Hdac5         | Intron25  | Y | 102079802 | 102086047 | 4 | 24.2 | 3.6  | 13.1 | 8.1  |
| chr8  | Gdf15         | Intron1   | Y | 73154074  | 73155231  | 3 | 24.6 | 1.7  | 13.0 | 8.1  |
| chr4  | Yrdc          | Intron2   | Y | 124529052 | 124529143 | 1 | 32.5 | 16.1 | 29.1 | 24.3 |
| chr4  | Mxra8         | Intron1   | Y | 155214000 | 155214886 | 1 | 25.9 | 9.5  | 18.2 | 13.3 |
| chr19 | Pitx3         | Exon2     | Y | 46211855  | 46211984  | 2 | 58.3 | 18.8 | 16.7 | 11.8 |
| chr2  | H13           | Intron4   | Y | 152511923 | 152514398 | 3 | 69.0 | 52.2 | 58.2 | 53.5 |
| chr7  | Gng8          | Intron1   | Y | 17477706  | 17477798  | 1 | 35.8 | 12.5 | 24.7 | 20.0 |
| chr15 | Naprt1        | Intron12  | Y | 75724278  | 75724446  | 2 | 21.2 | 0.5  | 9.6  | 5.0  |
| chr15 | Puf60         | LastExon  | Y | 75900612  | 75901057  | 2 | 85.3 | 69.5 | 74.7 | 70.4 |
| chr1  | Ctdsp1        | Intron5   | Y | 74441307  | 74441410  | 2 | 87.1 | 66.5 | 83.4 | 79.2 |
| chr11 | 1810043H04Rik | Intron2   | Y | 119960573 | 119961487 | 4 | 29.0 | 6.4  | 8.9  | 4.7  |
| chr9  | 1810026J23Rik | LastExon  | Y | 21397594  | 21400414  | 6 | 27.7 | 12.4 | 11.6 | 7.5  |

|       |               |           |   |           |           |    |      |      |      |      |
|-------|---------------|-----------|---|-----------|-----------|----|------|------|------|------|
| chr5  | Fbxl13        | Intron14  | Y | 21091112  | 21120467  | 2  | 72.7 | 51.6 | 72.1 | 68.0 |
| chr1  | 4933424G06Rik | Intron8   | Y | 36803417  | 36814634  | 2  | 58.5 | 24.2 | 56.6 | 52.6 |
| chr6  | Ccdc142       | 3-UTR     | Y | 83058372  | 83059115  | 4  | 25.0 | 5.3  | 10.0 | 6.0  |
| chr6  | Ccdc142       | LastExon  | Y | 83058085  | 83059115  | 4  | 25.0 | 5.3  | 10.0 | 6.0  |
| chr1  | Mir26b        | Downstre: | Y | 74440969  | 74441968  | 4  | 87.1 | 66.5 | 85.6 | 81.7 |
| chr7  | Tarsl2        | Exon11    | Y | 72822882  | 72823044  | 1  | 77.0 | 60.9 | 64.1 | 60.3 |
| chr9  | Gramd1b       | Intron18  | Y | 40141241  | 40220881  | 3  | 51.6 | 34.3 | 51.2 | 47.4 |
| chr11 | A030009H04Rik | 3-UTR     | Y | 69154661  | 69156149  | 2  | 87.8 | 64.3 | 62.8 | 59.2 |
| chr19 | 1700092M07Rik | LastExon  | Y | 8815465   | 8815715   | 2  | 28.7 | 11.1 | 13.0 | 9.4  |
| chr11 | Krt222        | Intron4   | Y | 99100069  | 99101806  | 1  | 42.0 | 25.5 | 35.2 | 31.9 |
| chr7  | Zfp580        | LastExon  | Y | 5004407   | 5005325   | 6  | 20.7 | 2.2  | 10.8 | 7.5  |
| chr8  | Pgbd5         | Intron6   | Y | 126908523 | 126957698 | 4  | 74.8 | 29.2 | 27.5 | 24.3 |
| chr7  | Efcab4a       | Intron1   | Y | 148647089 | 148649282 | 7  | 20.5 | 5.5  | 4.4  | 1.2  |
| chr19 | Arl2          | Intron4   | Y | 6137841   | 6141036   | 4  | 40.2 | 24.5 | 12.7 | 9.6  |
| chr2  | Rnf114        | Intron3   | Y | 167329102 | 167332546 | 5  | 61.5 | 21.8 | 11.0 | 7.9  |
| chr11 | Osbp2         | Intron12  | Y | 3626579   | 3719839   | 13 | 48.5 | 27.6 | 14.1 | 11.1 |
| chr7  | Ric8          | Intron2   | Y | 148043792 | 148043880 | 1  | 21.7 | 0.0  | 5.0  | 1.9  |
| chr1  | Faim3         | Intron5   | Y | 132774482 | 132774759 | 1  | 42.9 | 22.2 | 27.0 | 24.0 |
| chr14 | Saysd1        | Intron1   | Y | 20896867  | 20902099  | 2  | 19.0 | 3.3  | 5.2  | 2.2  |
| chr1  | Myeov2        | Intron2   | Y | 94536337  | 94538456  | 4  | 28.2 | 5.2  | 7.0  | 4.2  |
| chr15 | Sybu          | Intron7   | Y | 44579945  | 44619134  | 6  | 69.2 | 38.1 | 23.8 | 21.3 |
| chr13 | Kdm1b         | Intron1   | Y | 47139040  | 47143271  | 6  | 16.5 | 0.0  | 4.3  | 1.9  |
| chr2  | 1700101E01Rik | Intron5   | Y | 28841422  | 28910333  | 5  | 40.7 | 8.2  | 8.7  | 6.3  |
| chr10 | Lrp11         | Intron1   | Y | 7310412   | 7315901   | 2  | 17.9 | 1.6  | 3.5  | 1.1  |
| chr15 | 1700001L05Rik | Intron3   | Y | 83195941  | 83197419  | 2  | 45.3 | 27.5 | 26.4 | 24.0 |
| chr6  | Kcna1         | LastExon  | Y | 126586481 | 126593904 | 10 | 52.2 | 36.8 | 26.0 | 23.7 |
| chr4  | Yrdc          | Exon2     | Y | 124529144 | 124529263 | 1  | 53.6 | 28.9 | 31.1 | 28.8 |
| chr19 | Yif1a         | Intron1   | Y | 5088749   | 5089418   | 2  | 23.9 | 5.4  | 10.5 | 8.3  |
| chr3  | Sema6c        | 3-UTR     | Y | 94977211  | 94977972  | 4  | 27.1 | 11.5 | 9.9  | 7.8  |
| chr14 | Gja3          | LastExon  | Y | 57653297  | 57655767  | 5  | 92.9 | 77.1 | 76.7 | 74.8 |
| chr10 | Pip5k1c       | 3-UTR     | Y | 80780514  | 80782719  | 2  | 25.1 | 7.8  | 9.1  | 7.2  |
| chr10 | Pip5k1c       | LastExon  | Y | 80780511  | 80782719  | 2  | 25.1 | 7.8  | 9.1  | 7.2  |
| chr11 | Sdk2          | Intron44  | Y | 113804593 | 113927116 | 7  | 85.3 | 54.8 | 31.9 | 30.0 |
| chr4  | Gpr153        | LastExon  | Y | 151656967 | 151659446 | 7  | 57.1 | 15.2 | 16.1 | 14.2 |
| chr2  | Map1a         | Exon4     | Y | 121125005 | 121133108 | 2  | 94.6 | 78.8 | 83.7 | 82.0 |
| chr12 | Bcap29        | Intron6   | Y | 32315759  | 32319127  | 3  | 82.5 | 61.7 | 59.6 | 58.0 |
| chr10 | Txnrd1        | Intron1   | Y | 82296777  | 82335682  | 12 | 54.4 | 29.8 | 24.9 | 23.4 |
| chr7  | Rsph6a        | Exon2     | Y | 19650656  | 19651420  | 4  | 28.3 | 9.7  | 27.8 | 26.3 |
| chr5  | Caln1         | Intron1   | Y | 130845505 | 130890626 | 3  | 96.1 | 77.4 | 90.7 | 89.2 |
| chr1  | Hs6st1        | Intron1   | Y | 36126030  | 36160357  | 4  | 90.4 | 0.0  | 24.0 | 22.5 |
| chr9  | Dock3         | Intron52  | Y | 107081496 | 107133802 | 6  | 83.3 | 66.7 | 70.6 | 69.1 |
| chr7  | Scn1b         | Intron5   | Y | 31910241  | 31911684  | 5  | 21.5 | 4.7  | 17.4 | 15.9 |
| chr11 | Flt4          | Intron14  | Y | 49448298  | 49448394  | 1  | 35.0 | 17.2 | 33.6 | 32.2 |
| chr3  | Slitrk3       | Downstre: | Y | 72851047  | 72852046  | 2  | 78.3 | 58.6 | 73.7 | 72.5 |
| chr2  | 1700003F12Rik | Downstre: | Y | 154375785 | 154376784 | 2  | 87.5 | 55.4 | 61.3 | 60.1 |
| chr11 | Rgs9          | Intron18  | Y | 109142860 | 109159251 | 6  | 85.4 | 67.4 | 69.6 | 68.6 |
| chr6  | 1700003E16Rik | Intron1   | Y | 83106585  | 83110905  | 2  | 23.5 | 7.7  | 12.0 | 10.9 |
| chr6  | Il17re        | LastExon  | Y | 113419551 | 113420745 | 4  | 62.0 | 46.2 | 34.3 | 33.2 |
| chr13 | Gfod1         | LastExon  | Y | 43290888  | 43296613  | 6  | 87.9 | 63.7 | 72.8 | 71.9 |



|       |               |           |   |           |           |    |      |      |      |      |
|-------|---------------|-----------|---|-----------|-----------|----|------|------|------|------|
| chr14 | Ltb4r2        | LastExon  | Y | 56380745  | 56382066  | 7  | 57.5 | 39.4 | 11.3 | 10.3 |
| chr11 | Skap1         | Intron4   | Y | 96402801  | 96563922  | 4  | 87.3 | 67.2 | 91.2 | 90.3 |
| chr7  | Gys1          | Intron3   | Y | 52693664  | 52694848  | 2  | 71.9 | 56.8 | 70.7 | 69.9 |
| chr10 | Dapk3         | Intron7   | Y | 80654657  | 80655041  | 2  | 97.6 | 78.7 | 65.4 | 64.6 |
| chr7  | Zfp768        | LastExon  | Y | 134486309 | 134488389 | 6  | 68.8 | 53.1 | 86.9 | 86.1 |
| chr10 | Eef2          | Intron2   | Y | 80640625  | 80640797  | 2  | 81.3 | 41.9 | 44.5 | 43.7 |
| chr11 | Tbc1d16       | Intron11  | Y | 119072055 | 119089709 | 8  | 93.0 | 42.7 | 26.6 | 25.9 |
| chr17 | Wdr46         | Intron4   | Y | 34078464  | 34078577  | 1  | 69.4 | 51.3 | 55.2 | 54.7 |
| chr17 | Guca1b        | Intron1   | Y | 47522646  | 47526058  | 1  | 66.3 | 50.5 | 49.5 | 49.1 |
| chr1  | Rgs20         | Intron5   | Y | 5011119   | 5060090   | 6  | 27.3 | 9.3  | 11.5 | 11.2 |
| chr7  | Kcnk6         | Intron2   | Y | 30010887  | 30017180  | 2  | 33.7 | 8.9  | 25.5 | 25.2 |
| chr8  | Mfap3l        | Intron1   | Y | 63111856  | 63135256  | 6  | 93.3 | 62.3 | 30.9 | 30.7 |
| chr15 | Zfp385a       | LastExon  | Y | 103144326 | 103145656 | 6  | 38.9 | 21.0 | 32.1 | 32.0 |
| chr13 | Arhgef28      | Intron35  | Y | 98915551  | 98976027  | 5  | 83.9 | 38.9 | 33.0 | 32.9 |
| chr17 | Cyp4f40       | Intron11  | Y | 32812932  | 32813247  | 1  | 75.9 | 54.9 | 67.2 | 67.1 |
| chr7  | Zfp771        | Intron2   | Y | 134388649 | 134397318 | 3  | 86.3 | 40.4 | 37.8 | 37.9 |
| chr8  | Atmin         | Intron1   | Y | 119467651 | 119476773 | 4  | 19.6 | 3.9  | 0.2  | 0.3  |
| chr2  | Chrm4         | LastExon  | Y | 91767374  | 91769986  | 6  | 70.4 | 40.3 | 51.4 | 51.6 |
| chr18 | Synpo         | LastExon  | Y | 60753644  | 60756142  | 5  | 27.5 | 2.4  | 19.2 | 19.4 |
| chr10 | Eef2          | Downstre: | Y | 80645255  | 80646254  | 5  | 49.8 | 9.6  | 8.2  | 8.4  |
| chr10 | E030030106Rik | Intron1   | Y | 21834155  | 21868294  | 7  | 63.2 | 30.9 | 35.8 | 36.1 |
| chr8  | Upf3a         | Intron2   | Y | 13786254  | 13787364  | 2  | 61.4 | 2.5  | 2.0  | 2.3  |
| chr7  | Dhx32         | Intron11  | Y | 140951597 | 140968284 | 7  | 93.3 | 62.2 | 31.8 | 32.2 |
| chr6  | Wnt5b         | Intron4   | Y | 119398291 | 119493998 | 22 | 21.7 | 4.8  | 3.0  | 3.5  |
| chr8  | Cln8          | Intron1   | Y | 14889119  | 14894571  | 5  | 62.6 | 1.3  | 38.0 | 38.5 |
| chr2  | Kcnb1         | Intron1   | Y | 166931860 | 167013556 | 3  | 88.6 | 32.6 | 31.9 | 32.5 |
| chr11 | Trpv3         | Intron5   | Y | 73092573  | 73093263  | 2  | 52.3 | 17.1 | 47.2 | 47.8 |
| chr17 | Cyp4f40       | Downstre: | Y | 32813426  | 32814425  | 1  | 16.1 | 0.0  | 1.0  | 1.6  |
| chr5  | Rell1         | Intron6   | Y | 64329273  | 64359884  | 4  | 47.5 | 0.0  | 46.5 | 47.1 |
| chr13 | Elmo1         | Intron1   | Y | 20182641  | 20277222  | 7  | 87.6 | 48.6 | 16.1 | 16.7 |
| chr7  | Irgq          | Intron2   | Y | 25316935  | 25318284  | 2  | 91.6 | 50.6 | 48.5 | 49.1 |
| chr8  | Shcbp1        | Intron12  | Y | 4768312   | 4779420   | 4  | 86.9 | 45.6 | 45.1 | 45.7 |
| chr13 | Fam65b        | Intron16  | Y | 24802161  | 24805490  | 1  | 33.3 | 11.9 | 11.1 | 11.8 |
| chr11 | Rab40b        | Intron5   | Y | 121224879 | 121249311 | 3  | 53.6 | 30.0 | 14.9 | 15.7 |
| chr10 | Gng7          | Intron3   | Y | 80460790  | 80477600  | 8  | 31.6 | 14.3 | 29.7 | 30.5 |
| chr1  | Rims1         | Intron31  | Y | 22733850  | 22812399  | 2  | 55.3 | 37.5 | 35.8 | 36.6 |
| chr9  | Abcg4         | Intron13  | Y | 44090005  | 44095298  | 1  | 38.6 | 19.5 | 32.5 | 33.3 |
| chr8  | Rnf166        | Intron5   | Y | 124994257 | 124999762 | 5  | 17.7 | 2.6  | 3.0  | 3.9  |
| chr10 | D630013N20Rik | Downstre: | Y | 70062797  | 70063796  | 3  | 44.0 | 21.7 | 0.6  | 1.6  |
| chr8  | Eps15l1       | Intron23  | Y | 74924133  | 74945303  | 4  | 20.0 | 3.4  | 0.9  | 1.8  |
| chr13 | Acot12        | Intron1   | Y | 91881266  | 91889792  | 3  | 20.0 | 3.3  | 13.8 | 14.7 |
| chr2  | Vstm2l        | Intron3   | Y | 157762978 | 157769592 | 6  | 31.0 | 6.0  | 3.8  | 4.7  |
| chr1  | Sctr          | Intron1   | Y | 121903909 | 121918734 | 3  | 41.6 | 5.6  | 30.5 | 31.5 |
| chr18 | Pdgfrb        | Intron6   | Y | 61224834  | 61225368  | 1  | 30.3 | 11.0 | 15.4 | 16.4 |
| chr18 | Nrg2          | Intron9   | Y | 36212606  | 36356081  | 12 | 30.0 | 4.3  | 16.8 | 17.8 |
| chr3  | Sema6c        | LastExon  | Y | 94976177  | 94977972  | 9  | 27.1 | 11.5 | 15.1 | 16.5 |
| chr5  | Rgs12         | Intron1   | Y | 35292174  | 35307421  | 4  | 37.2 | 2.4  | 1.5  | 2.9  |
| chr7  | Tsku          | Intron1   | Y | 105501641 | 105509787 | 8  | 40.4 | 18.8 | 6.3  | 7.7  |
| chr8  | Cacna1a       | Intron19  | Y | 87083590  | 87089846  | 3  | 67.2 | 45.1 | 40.8 | 42.2 |

|       |          |           |   |           |           |    |       |      |      |      |
|-------|----------|-----------|---|-----------|-----------|----|-------|------|------|------|
| chr15 | Zfp623   | Intron1   | Y | 75771590  | 75777552  | 4  | 22.9  | 1.3  | 4.5  | 6.0  |
| chr14 | Synpo21  | LastExon  | Y | 21478640  | 21481687  | 6  | 41.8  | 15.8 | 8.5  | 10.0 |
| chr2  | Dok5     | Intron1   | Y | 170557689 | 170626349 | 7  | 94.2  | 69.5 | 69.0 | 70.6 |
| chr16 | Hmox2    | Intron1   | Y | 4726472   | 4762558   | 7  | 24.4  | 1.2  | 3.8  | 5.6  |
| chr5  | Tchp     | Intron10  | Y | 115168470 | 115169587 | 2  | 84.2  | 67.8 | 79.7 | 81.6 |
| chr17 | Dusp1    | Intron2   | Y | 26644150  | 26644518  | 2  | 19.6  | 2.1  | 17.4 | 19.3 |
| chr1  | Syt2     | LastExon  | Y | 136644052 | 136645994 | 2  | 57.8  | 40.7 | 33.8 | 35.9 |
| chr10 | Ptprb    | Intron1   | Y | 115738736 | 115739163 | 2  | 23.8  | 8.3  | 18.9 | 21.0 |
| chr5  | Mxd4     | Intron4   | Y | 34526993  | 34529977  | 4  | 46.4  | 26.6 | 13.8 | 15.9 |
| chr10 | Inhbe    | LastExon  | Y | 126786458 | 126788067 | 3  | 24.3  | 6.5  | 11.7 | 13.9 |
| chr7  | Spns1    | Exon10    | Y | 133520188 | 133520253 | 1  | 66.2  | 48.7 | 54.9 | 57.1 |
| chr2  | Myh7b    | Intron29  | Y | 155455417 | 155455993 | 3  | 100.0 | 61.9 | 56.0 | 58.6 |
| chr1  | Kcnh1    | Intron1   | Y | 194014969 | 194045214 | 3  | 26.5  | 9.1  | 6.9  | 9.5  |
| chr16 | Rtn4r    | Intron1   | Y | 18127996  | 18150824  | 5  | 62.2  | 34.5 | 20.3 | 23.0 |
| chr14 | Sall2    | LastExon  | Y | 52930852  | 52935338  | 3  | 92.7  | 63.3 | 62.2 | 65.0 |
| chr13 | Shc3     | Intron11  | Y | 51611965  | 51662339  | 3  | 56.5  | 38.8 | 16.0 | 18.9 |
| chr2  | Myl9     | LastExon  | Y | 156606726 | 156607393 | 2  | 72.9  | 38.7 | 50.3 | 53.3 |
| chr19 | Dagla    | Intron19  | Y | 10346122  | 10379310  | 6  | 63.2  | 40.4 | 15.7 | 18.6 |
| chr13 | Rnf144b  | Intron1   | Y | 47218243  | 47302728  | 9  | 85.6  | 36.6 | 19.8 | 22.8 |
| chr13 | Gprin1   | Intron2   | Y | 54843470  | 54850930  | 5  | 64.6  | 37.2 | 32.5 | 35.6 |
| chr7  | Adck4    | LastExon  | Y | 28042242  | 28042968  | 3  | 30.8  | 14.8 | 40.2 | 43.5 |
| chr10 | Ppm1h    | Intron1   | Y | 122116487 | 122219238 | 9  | 45.5  | 19.0 | 41.4 | 44.7 |
| chr18 | Cxxc5    | Intron1   | Y | 35989641  | 36018046  | 19 | 25.1  | 6.9  | 16.8 | 20.2 |
| chr7  | Gm2115   | Intron1   | Y | 91677700  | 91724214  | 2  | 33.3  | 12.0 | 13.6 | 17.1 |
| chr15 | Srebf2   | Intron3   | Y | 82001714  | 82003182  | 1  | 44.4  | 24.2 | 43.7 | 47.2 |
| chr4  | Heyl     | Intron1   | Y | 122911190 | 122917373 | 8  | 80.6  | 46.9 | 15.5 | 19.1 |
| chr1  | Rassf5   | Intron4   | Y | 133078832 | 133108833 | 2  | 24.3  | 9.2  | 20.7 | 24.3 |
| chr7  | Ifitm10  | Exon2     | Y | 149556763 | 149557215 | 2  | 95.1  | 59.6 | 68.1 | 71.8 |
| chr4  | Gm13032  | Intron2   | Y | 140370183 | 140372610 | 3  | 28.0  | 7.6  | 9.4  | 13.1 |
| chr4  | Prdm16   | Intron6   | Y | 153708562 | 153709201 | 3  | 73.0  | 57.9 | 52.1 | 55.9 |
| chr4  | Tas1r1   | LastExon  | Y | 151402023 | 151403106 | 3  | 29.3  | 13.1 | 8.1  | 12.1 |
| chr17 | Tbc1d24  | Intron9   | Y | 24326999  | 24342418  | 4  | 31.6  | 7.5  | 13.6 | 17.6 |
| chr7  | Rtn2     | LastExon  | Y | 19881065  | 19881513  | 3  | 56.5  | 0.4  | 11.1 | 15.2 |
| chr7  | Gpr123   | Intron7   | Y | 147059957 | 147060865 | 1  | 68.2  | 50.0 | 50.6 | 54.7 |
| chr2  | Epb4.111 | Intron1   | Y | 156247036 | 156319639 | 13 | 66.8  | 48.3 | 14.9 | 19.3 |
| chr8  | Pkn1     | Downstre: | Y | 86192661  | 86193660  | 4  | 61.1  | 43.3 | 54.8 | 59.3 |
| chr11 | Rara     | Intron1   | Y | 98799194  | 98811558  | 6  | 67.4  | 49.6 | 19.6 | 24.1 |
| chr13 | Habp4    | Intron1   | Y | 64263643  | 64271321  | 6  | 62.1  | 19.5 | 36.2 | 40.7 |
| chr5  | Smarcd3  | Downstre: | Y | 24097440  | 24098439  | 2  | 70.2  | 53.3 | 49.0 | 53.5 |
| chr5  | Chst12   | Intron1   | Y | 140981651 | 140999494 | 5  | 44.8  | 28.6 | 18.3 | 22.9 |
| chr16 | Thpo     | Intron5   | Y | 20729291  | 20734334  | 13 | 61.5  | 46.1 | 26.5 | 31.3 |
| chr4  | Bach2    | Intron1   | Y | 32504559  | 32588587  | 2  | 46.3  | 28.6 | 26.6 | 31.8 |
| chr7  | Slco3a1  | Intron10  | Y | 81649529  | 81699296  | 4  | 49.2  | 30.2 | 22.7 | 28.0 |
| chr5  | Igfbp7   | Intron5   | Y | 77830605  | 77836564  | 1  | 38.9  | 23.7 | 31.4 | 37.0 |
| chr7  | Zfp128   | Intron1   | Y | 13466710  | 13469991  | 2  | 28.6  | 2.0  | 13.7 | 19.4 |
| chr1  | Mroh2a   | Exon33    | Y | 90151665  | 90151868  | 1  | 90.9  | 75.8 | 84.8 | 90.6 |
| chr17 | Neu1     | Exon3     | Y | 35070948  | 35071130  | 1  | 70.2  | 54.0 | 59.6 | 65.6 |
| chr11 | Wscd1    | Intron1   | Y | 71564328  | 71573079  | 6  | 26.9  | 2.8  | 4.0  | 10.4 |
| chr8  | Gdf1     | LastExon  | Y | 72854598  | 72855491  | 7  | 65.5  | 34.8 | 64.2 | 70.7 |

|       |          |           |   |           |           |    |      |      |      |      |
|-------|----------|-----------|---|-----------|-----------|----|------|------|------|------|
| chr1  | Fcrlb    | LastExon  | Y | 172837404 | 172837834 | 2  | 30.2 | 7.3  | 13.4 | 20.2 |
| chr8  | Rln3     | Intron1   | Y | 86567231  | 86568668  | 1  | 20.0 | 4.3  | 13.2 | 20.4 |
| chr10 | Nfic     | Intron8   | Y | 80883544  | 80889820  | 6  | 85.1 | 41.7 | 29.1 | 36.4 |
| chr10 | Jsrp1    | Intron4   | Y | 80273312  | 80274811  | 1  | 65.3 | 49.0 | 42.7 | 50.0 |
| chr7  | Mypop    | Intron2   | Y | 19577970  | 19585839  | 2  | 80.4 | 50.9 | 39.5 | 47.0 |
| chr15 | Zfat     | Intron15  | Y | 68056506  | 68090229  | 4  | 21.9 | 1.4  | 10.7 | 18.2 |
| chr8  | Upf1     | Downstre: | Y | 72854421  | 72855420  | 5  | 65.5 | 34.8 | 59.9 | 67.4 |
| chr14 | Sorbs3   | Intron20  | Y | 70603224  | 70607330  | 6  | 44.6 | 18.7 | 16.0 | 23.4 |
| chr9  | Tpbp     | LastExon  | Y | 85737258  | 85740662  | 9  | 91.8 | 55.7 | 31.1 | 38.6 |
| chr10 | Anks1b   | Intron24  | Y | 90429138  | 90432548  | 4  | 56.8 | 25.0 | 10.4 | 17.9 |
| chr17 | Memo1    | Intron8   | Y | 74657846  | 74694031  | 6  | 87.2 | 62.0 | 30.1 | 37.7 |
| chr15 | Gramd4   | Intron1   | Y | 85888262  | 85921742  | 10 | 17.5 | 2.5  | 0.8  | 8.5  |
| chr11 | Grb10    | Intron16  | Y | 11887678  | 11937194  | 14 | 66.6 | 45.1 | 42.8 | 50.8 |
| chr11 | Gucy2e   | Intron9   | Y | 69041139  | 69041544  | 1  | 45.0 | 25.8 | 39.4 | 47.5 |
| chr6  | Gm5577   | Intron1   | Y | 87931879  | 87932953  | 3  | 27.3 | 11.9 | 5.0  | 13.3 |
| chr5  | Kcnh2    | Intron14  | Y | 23854360  | 23857025  | 5  | 72.1 | 48.4 | 24.7 | 33.1 |
| chr4  | Slc6a9   | Exon12    | Y | 117540364 | 117540534 | 1  | 57.6 | 34.8 | 43.4 | 51.9 |
| chr16 | Gp5      | 3-UTR     | Y | 30307771  | 30308236  | 1  | 85.2 | 57.1 | 62.7 | 71.4 |
| chr17 | Tulp1    | Intron10  | Y | 28499937  | 28500630  | 2  | 60.1 | 43.1 | 30.1 | 38.8 |
| chr15 | Pdgb     | Intron6   | Y | 79835996  | 79844365  | 11 | 77.0 | 46.4 | 10.0 | 18.9 |
| chr10 | Txnrd1   | Intron2   | Y | 82323376  | 82337357  | 5  | 90.4 | 66.6 | 54.4 | 63.8 |
| chr8  | Use1     | Intron5   | Y | 73892011  | 73892448  | 1  | 85.0 | 68.8 | 73.1 | 82.6 |
| chr2  | Mapk8ip1 | Intron11  | Y | 92231299  | 92241185  | 7  | 68.2 | 3.6  | 8.9  | 18.5 |
| chr18 | Lims2    | Intron1   | Y | 32091205  | 32101393  | 7  | 95.6 | 65.1 | 46.0 | 55.9 |
| chr12 | Begain   | LastExon  | Y | 110270392 | 110272561 | 8  | 86.4 | 54.9 | 53.3 | 63.2 |
| chr11 | Ccdc40   | Intron13  | Y | 119113331 | 119114563 | 1  | 33.3 | 20.8 | 52.2 | 46.4 |
| chr8  | Plekha2  | Intron9   | Y | 26174459  | 26182470  | 2  | 24.1 | 12.1 | 51.7 | 14.4 |
| chr8  | Abhd8    | Intron1   | Y | 73981277  | 73981936  | 2  | 8.9  | 0.0  | 47.7 | 0.0  |
| chr9  | Ap1m2    | Intron10  | Y | 21114237  | 21116650  | 2  | 0.6  | 0.3  | 44.0 | 0.0  |
| chr18 | Zfp608   | Intron8   | Y | 55106463  | 55147264  | 4  | 0.0  | 0.0  | 38.2 | 0.0  |
| chr15 | Smpd5    | Intron1   | Y | 76125722  | 76125819  | 1  | 40.0 | 41.9 | 80.6 | 46.5 |
| chr5  | Steap4   | Intron1   | Y | 7960542   | 7975438   | 3  | 0.0  | 0.4  | 33.6 | 1.0  |
| chr7  | Fam71e1  | Intron4   | Y | 51755809  | 51756337  | 1  | 34.1 | 38.1 | 57.1 | 28.6 |
| chr4  | Fndc5    | Intron1   | Y | 128814408 | 128815934 | 3  | 13.2 | 23.8 | 31.7 | 5.2  |
| chr11 | Rilp     | Intron4   | Y | 75324510  | 75324790  | 1  | 27.3 | 34.9 | 53.3 | 28.8 |
| chr7  | B9d2     | 3-UTR     | Y | 26471314  | 26471577  | 2  | 25.4 | 32.2 | 51.8 | 28.1 |
| chr5  | Diablo   | Exon4     | Y | 123973264 | 123973390 | 1  | 25.0 | 35.1 | 47.1 | 26.3 |
| chr2  | Kcnk15   | Intron1   | Y | 163679826 | 163683918 | 3  | 9.3  | 6.9  | 25.0 | 5.1  |
| chr16 | Ildr1    | Intron2   | Y | 36708507  | 36709564  | 1  | 61.1 | 58.2 | 77.0 | 58.7 |
| chr7  | Mamstr   | Exon8     | Y | 52899889  | 52899943  | 1  | 6.0  | 0.0  | 21.5 | 3.7  |
| chr8  | Zswim4   | Downstre: | Y | 86733841  | 86734840  | 4  | 3.0  | 17.4 | 37.2 | 20.0 |
| chr2  | Slc12a5  | Exon24    | Y | 164822610 | 164822743 | 1  | 17.8 | 25.2 | 36.0 | 19.2 |
| chr13 | Nxn12    | Intron1   | Y | 51266994  | 51269993  | 2  | 3.8  | 2.7  | 20.6 | 3.9  |
| chr5  | Mtus2    | Intron9   | Y | 149100665 | 149107058 | 1  | 59.4 | 69.2 | 79.1 | 63.4 |
| chr2  | Pigu     | Downstre: | Y | 155102988 | 155103987 | 2  | 24.8 | 31.2 | 54.4 | 39.1 |
| chr2  | Map11c3a | Intron3   | Y | 155102941 | 155103210 | 3  | 12.4 | 15.6 | 36.3 | 21.0 |
| chr10 | Amh      | Downstre: | Y | 80270394  | 80271393  | 5  | 8.0  | 11.6 | 23.5 | 8.3  |
| chr10 | Jsrp1    | Downstre: | Y | 80270241  | 80271240  | 5  | 8.0  | 11.6 | 23.5 | 8.3  |

**Table S2. Lists of non-CGI mDMR genes****Group 5-mDMR genes associated with methylation gain at 5' non-CGI**

| Chr   | Gene          | Region   | CGI | Start     | End       | #Bins | DNA Methylation Level (%) |      |             |      |
|-------|---------------|----------|-----|-----------|-----------|-------|---------------------------|------|-------------|------|
|       |               |          |     |           |           |       | ISCs                      |      | Diff. Cells |      |
|       |               |          |     |           |           |       | P0                        | P21  | P0          | P21  |
| chr11 | Snf8          | Upstream | N   | 95895231  | 95896230  | 3     | 36.8                      | 68.1 | 48.9        | 97.2 |
| chr6  | Lym5          | Upstream | N   | 145158654 | 145159653 | 2     | 22.6                      | 77.6 | 5.3         | 53.0 |
| chr17 | Zfp13         | Upstream | N   | 23736455  | 23737454  | 5     | 0.0                       | 38.2 | 6.3         | 52.0 |
| chr15 | Cpq           | Upstream | N   | 33011884  | 33012883  | 5     | 51.4                      | 95.5 | 5.1         | 49.8 |
| chr19 | Slc22a20      | Upstream | N   | 5986144   | 5987143   | 5     | 39.1                      | 86.8 | 44.3        | 88.8 |
| chr3  | Sv2a          | Upstream | N   | 95984150  | 95985149  | 4     | 54.0                      | 72.5 | 42.5        | 87.0 |
| chr5  | Pla2g1b       | Upstream | N   | 115915275 | 115916274 | 4     | 2.5                       | 47.9 | 46.3        | 90.6 |
| chr17 | T2            | Upstream | N   | 8564261   | 8565260   | 5     | 40.2                      | 55.7 | 13.2        | 57.4 |
| chr18 | Slc39a6       | Upstream | N   | 24762319  | 24763318  | 2     | 10.5                      | 44.6 | 14.7        | 58.8 |
| chr12 | Myt1l         | Upstream | N   | 30212249  | 30213248  | 5     | 29.0                      | 57.1 | 31.2        | 74.4 |
| chr17 | C2            | Upstream | N   | 35019046  | 35020045  | 5     | 32.5                      | 56.5 | 4.7         | 47.3 |
| chr12 | Matn3         | Upstream | N   | 8953735   | 8954734   | 3     | 9.6                       | 71.9 | 33.1        | 75.2 |
| chr4  | C8b           | Upstream | N   | 104437922 | 104438921 | 5     | 20.7                      | 89.4 | 49.3        | 91.4 |
| chr10 | Trappc3l      | Upstream | N   | 33756403  | 33757402  | 5     | 63.6                      | 80.2 | 43.5        | 84.2 |
| chr5  | Pex1          | Upstream | N   | 3595066   | 3596065   | 3     | 3.0                       | 64.9 | 4.0         | 44.5 |
| chr8  | Arl2bp        | Upstream | N   | 97189655  | 97190654  | 3     | 3.8                       | 39.1 | 5.7         | 44.2 |
| chr9  | 1110036E04Rik | Upstream | N   | 63896636  | 63897635  | 5     | 22.9                      | 64.5 | 24.1        | 62.2 |
| chr1  | Tmem14a       | Upstream | N   | 21207712  | 21208711  | 5     | 58.7                      | 77.6 | 34.8        | 72.7 |
| chr6  | Tmem168       | Upstream | N   | 13558064  | 13559063  | 2     | 17.0                      | 64.6 | 19.9        | 56.3 |
| chr9  | Med17         | Upstream | N   | 15084312  | 15085311  | 2     | 1.1                       | 41.7 | 29.7        | 65.5 |
| chr17 | Lix1          | Upstream | N   | 17538650  | 17539649  | 5     | 14.8                      | 37.0 | 27.3        | 63.0 |
| chr2  | Otor          | Upstream | N   | 142903228 | 142904227 | 5     | 54.5                      | 73.3 | 26.7        | 62.3 |
| chr8  | Zfx3          | Upstream | N   | 111237544 | 111238543 | 3     | 22.0                      | 63.3 | 21.3        | 56.8 |
| chr9  | Igdcc3        | Upstream | N   | 64987996  | 64988995  | 2     | 22.0                      | 45.8 | 27.9        | 62.7 |
| chr4  | Susd1         | Upstream | N   | 59451506  | 59452505  | 4     | 28.3                      | 49.2 | 15.2        | 49.6 |
| chr9  | Gramd1b       | Upstream | N   | 40263350  | 40264349  | 1     | 39.7                      | 71.5 | 40.8        | 75.2 |
| chr15 | Krt83         | Upstream | N   | 101269236 | 101270235 | 3     | 45.0                      | 84.9 | 41.7        | 75.9 |
| chr5  | Sds           | Upstream | N   | 120925556 | 120926555 | 5     | 10.0                      | 42.5 | 14.0        | 47.9 |
| chr18 | Snora74a      | Upstream | N   | 35715684  | 35716683  | 5     | 46.5                      | 68.8 | 27.4        | 60.7 |
| chr10 | Rab21         | Upstream | N   | 114752648 | 114753647 | 2     | 74.2                      | 92.9 | 55.4        | 88.5 |
| chr11 | Sat2          | Upstream | N   | 69434611  | 69435610  | 5     | 3.6                       | 27.1 | 4.1         | 36.5 |
| chr12 | Pfn4          | Upstream | N   | 4775101   | 4776100   | 2     | 42.5                      | 90.5 | 63.3        | 95.7 |
| chr6  | Mrps35        | Upstream | N   | 146990292 | 146991291 | 4     | 30.8                      | 69.0 | 56.0        | 88.2 |
| chr5  | Cad           | Upstream | N   | 31356184  | 31357183  | 2     | 52.6                      | 87.1 | 54.6        | 86.7 |
| chr14 | Sap18         | Upstream | N   | 58416026  | 58417025  | 3     | 16.4                      | 45.6 | 19.6        | 51.5 |
| chr11 | Abr           | Upstream | N   | 76391230  | 76392229  | 5     | 16.9                      | 41.9 | 15.3        | 47.1 |
| chr10 | Rmst          | Upstream | N   | 91627924  | 91628923  | 5     | 25.5                      | 55.2 | 19.1        | 50.3 |
| chr1  | 4930487H11Rik | Upstream | N   | 62841307  | 62842306  | 4     | 25.2                      | 56.8 | 24.3        | 54.6 |
| chr3  | Fabp12        | Upstream | N   | 10301184  | 10302183  | 5     | 70.5                      | 88.2 | 56.7        | 86.9 |
| chr7  | Aldh1a3       | Upstream | N   | 73572364  | 73573363  | 1     | 54.0                      | 72.1 | 44.5        | 74.6 |
| chr2  | Gm757         | Upstream | N   | 25092308  | 25093307  | 5     | 39.2                      | 58.5 | 44.0        | 74.1 |
| chr6  | St3gal5       | Upstream | N   | 72046607  | 72047606  | 2     | 40.6                      | 76.2 | 43.4        | 73.1 |
| chr9  | Lztf1l        | Upstream | N   | 123626676 | 123627675 | 2     | 18.2                      | 51.3 | 21.4        | 50.7 |
| chr10 | Tle2          | Upstream | N   | 81037032  | 81038031  | 4     | 17.1                      | 64.2 | 48.8        | 78.2 |

|       |               |          |   |           |           |   |      |       |      |      |
|-------|---------------|----------|---|-----------|-----------|---|------|-------|------|------|
| chr5  | Mmd2          | Upstream | N | 143084707 | 143085706 | 3 | 56.8 | 85.4  | 56.2 | 85.4 |
| chr11 | Tbcd          | Upstream | N | 121312263 | 121313262 | 3 | 8.2  | 53.8  | 26.7 | 55.8 |
| chr11 | Plscr3        | Upstream | N | 69658874  | 69659873  | 3 | 27.3 | 50.8  | 29.4 | 58.1 |
| chr6  | Slc6a6        | Upstream | N | 91633061  | 91634060  | 2 | 35.0 | 59.2  | 42.5 | 71.0 |
| chr15 | Nfam1         | Upstream | N | 82863828  | 82864827  | 5 | 36.5 | 66.0  | 25.7 | 54.2 |
| chr1  | Inha          | Upstream | N | 75502652  | 75503651  | 2 | 59.2 | 76.7  | 48.7 | 77.1 |
| chr6  | Hoxa3         | Upstream | N | 52163067  | 52164066  | 3 | 16.9 | 56.8  | 5.4  | 33.7 |
| chr10 | Itga7         | Upstream | N | 128369869 | 128370868 | 4 | 39.1 | 70.3  | 43.2 | 71.5 |
| chr19 | Golga7b       | Upstream | N | 42321068  | 42322067  | 5 | 11.6 | 67.1  | 23.7 | 51.9 |
| chr13 | 1110007C09Rik | Upstream | N | 49311396  | 49312395  | 3 | 42.0 | 75.3  | 60.2 | 88.2 |
| chr2  | Snph          | Upstream | N | 151458270 | 151459269 | 3 | 64.0 | 87.2  | 60.2 | 88.0 |
| chr18 | Kcng2         | Upstream | N | 80560994  | 80561993  | 5 | 61.9 | 77.2  | 52.4 | 79.9 |
| chr12 | Prox2         | Upstream | N | 86447382  | 86448381  | 5 | 31.9 | 59.3  | 33.5 | 60.4 |
| chr18 | Ctif          | Upstream | N | 75857351  | 75858350  | 2 | 24.5 | 55.6  | 21.1 | 47.9 |
| chr10 | Tnfaip3       | Upstream | N | 18735217  | 18736216  | 3 | 13.1 | 29.5  | 13.1 | 39.7 |
| chr17 | Smoc2         | Upstream | N | 14415513  | 14416512  | 2 | 7.4  | 25.8  | 13.9 | 40.3 |
| chr17 | 1600014C23Rik | Upstream | N | 45870794  | 45871793  | 2 | 65.2 | 84.7  | 57.6 | 84.0 |
| chr10 | Rap1b         | Upstream | N | 117283031 | 117284030 | 2 | 67.5 | 83.3  | 59.5 | 85.4 |
| chr17 | Ly6g6d        | Upstream | N | 35211410  | 35212409  | 5 | 50.0 | 95.0  | 62.1 | 88.0 |
| chr1  | Gm216         | Upstream | N | 74407682  | 74408681  | 5 | 47.1 | 91.1  | 61.8 | 87.6 |
| chr3  | Clca3         | Upstream | N | 144695741 | 144696740 | 5 | 31.8 | 52.1  | 38.1 | 63.5 |
| chr13 | Cplx2         | Upstream | N | 54471713  | 54472712  | 4 | 7.9  | 57.4  | 25.4 | 50.7 |
| chr12 | Plekhh1       | Upstream | N | 80129150  | 80130149  | 2 | 4.5  | 37.0  | 14.3 | 39.0 |
| chr4  | Enho          | Upstream | N | 41587336  | 41588335  | 2 | 37.9 | 54.2  | 34.4 | 59.1 |
| chr18 | Wnt8a         | Upstream | N | 34700982  | 34701981  | 5 | 33.0 | 49.8  | 32.0 | 56.5 |
| chr18 | Phax          | Upstream | N | 56721223  | 56722222  | 2 | 21.7 | 57.7  | 27.9 | 52.1 |
| chr18 | A830052D11Rik | Upstream | N | 32537939  | 32538938  | 5 | 5.0  | 57.7  | 36.8 | 60.9 |
| chr1  | Vangl2        | Upstream | N | 173957400 | 173958399 | 3 | 27.9 | 53.3  | 39.4 | 63.5 |
| chr14 | Gjb2          | Upstream | N | 57723540  | 57724539  | 2 | 17.0 | 38.2  | 34.2 | 58.2 |
| chr3  | Spag17        | Upstream | N | 99688340  | 99689339  | 5 | 2.7  | 29.4  | 4.1  | 28.0 |
| chr18 | Ticam2        | Upstream | N | 46734188  | 46735187  | 4 | 34.6 | 66.3  | 37.9 | 61.5 |
| chr11 | Kcnip1        | Upstream | N | 33893194  | 33894193  | 5 | 43.9 | 60.9  | 35.5 | 59.0 |
| chr5  | Gpr81         | Upstream | N | 124330030 | 124331029 | 5 | 61.0 | 77.9  | 48.1 | 71.5 |
| chr16 | Gp1bb         | Upstream | N | 18622497  | 18623496  | 3 | 66.3 | 89.1  | 63.8 | 87.2 |
| chr7  | Gm7092        | Upstream | N | 26400912  | 26401911  | 5 | 39.5 | 61.2  | 65.5 | 88.8 |
| chr17 | Angptl4       | Upstream | N | 33918521  | 33919520  | 3 | 48.4 | 85.7  | 70.8 | 94.0 |
| chr17 | Mocs1         | Upstream | N | 49566689  | 49567688  | 4 | 61.5 | 96.9  | 43.4 | 66.6 |
| chr6  | Il5ra         | Upstream | N | 106699032 | 106700031 | 5 | 29.5 | 53.7  | 39.4 | 62.5 |
| chr13 | Pitx1         | Upstream | N | 55932787  | 55933786  | 1 | 64.0 | 85.7  | 51.9 | 75.0 |
| chr16 | Bach1         | Upstream | N | 87698199  | 87699198  | 2 | 36.0 | 64.3  | 31.4 | 54.3 |
| chr4  | Zfp37         | Upstream | N | 61869581  | 61870580  | 3 | 8.2  | 33.3  | 15.6 | 38.5 |
| chr9  | Dyx1c1        | Upstream | N | 72805592  | 72806591  | 3 | 20.3 | 71.9  | 46.7 | 69.4 |
| chr1  | Capn8         | Upstream | N | 184494138 | 184495137 | 5 | 25.6 | 57.7  | 52.0 | 74.6 |
| chr19 | Loxl4         | Upstream | N | 42687297  | 42688296  | 2 | 37.1 | 52.8  | 36.0 | 58.5 |
| chr4  | Heyl          | Upstream | N | 122909799 | 122910798 | 4 | 58.5 | 78.3  | 45.9 | 68.1 |
| chr7  | Mapk3         | Upstream | N | 133902140 | 133903139 | 2 | 63.2 | 100.0 | 58.4 | 80.7 |
| chr5  | Zfand2a       | Upstream | N | 139960446 | 139961445 | 3 | 75.9 | 94.6  | 71.1 | 93.3 |
| chr2  | Wfdc13        | Upstream | N | 164509607 | 164510606 | 5 | 65.8 | 82.6  | 63.8 | 85.9 |
| chr9  | 2310014F07Rik | Upstream | N | 50312911  | 50313910  | 5 | 16.3 | 37.4  | 18.2 | 40.2 |

|       |               |          |   |           |           |   |      |       |      |       |
|-------|---------------|----------|---|-----------|-----------|---|------|-------|------|-------|
| chr13 | Rnf182        | Upstream | N | 43710166  | 43711165  | 4 | 27.6 | 47.9  | 31.4 | 53.3  |
| chr2  | 5430417L22Rik | Upstream | N | 118570498 | 118571497 | 1 | 11.9 | 32.2  | 13.0 | 34.7  |
| chr5  | Pomp          | Upstream | N | 148671204 | 148672203 | 3 | 3.4  | 45.4  | 14.4 | 36.1  |
| chr6  | Clstn3        | Upstream | N | 124414803 | 124415802 | 5 | 29.6 | 86.3  | 22.0 | 43.6  |
| chr9  | Gm10684       | Upstream | N | 44943690  | 44944689  | 5 | 32.5 | 57.8  | 36.3 | 57.6  |
| chr14 | Mir3075       | Upstream | N | 26352925  | 26353924  | 5 | 41.4 | 59.0  | 56.8 | 78.1  |
| chr2  | Clic3         | Upstream | N | 25311363  | 25312362  | 5 | 26.9 | 64.0  | 30.1 | 51.3  |
| chr4  | Pdzk1ip1      | Upstream | N | 114760313 | 114761312 | 5 | 41.2 | 67.8  | 42.9 | 64.0  |
| chr5  | Nyap1         | Upstream | N | 138181227 | 138182226 | 4 | 39.8 | 69.5  | 38.1 | 59.2  |
| chr8  | Pde4c         | Upstream | N | 73246963  | 73247962  | 5 | 56.1 | 79.1  | 50.2 | 71.3  |
| chr4  | Cdh17         | Upstream | N | 11684304  | 11685303  | 5 | 13.3 | 36.3  | 44.2 | 65.1  |
| chr18 | Zfp532        | Upstream | N | 65738884  | 65739883  | 5 | 55.2 | 73.6  | 61.1 | 82.0  |
| chr3  | Cd160         | Upstream | N | 96633275  | 96634274  | 5 | 65.8 | 83.6  | 51.1 | 71.6  |
| chr17 | Gm14873       | Upstream | N | 47838946  | 47839945  | 5 | 76.9 | 92.7  | 61.6 | 82.1  |
| chr2  | Zfp133-ps     | Upstream | N | 144284016 | 144285015 | 3 | 36.8 | 63.8  | 69.5 | 89.9  |
| chr9  | Col7a1        | Upstream | N | 108854790 | 108855789 | 5 | 26.8 | 75.7  | 28.7 | 49.0  |
| chr11 | St6galnac1    | Upstream | N | 116636822 | 116637821 | 5 | 61.6 | 79.2  | 48.0 | 68.1  |
| chr13 | Gm11346       | Upstream | N | 24696637  | 24697636  | 3 | 32.0 | 66.9  | 48.7 | 68.7  |
| chr3  | Nudt17        | Upstream | N | 96512484  | 96513483  | 4 | 72.0 | 100.0 | 80.0 | 100.0 |
| chr3  | Fgg           | Upstream | N | 82810818  | 82811817  | 5 | 23.7 | 48.1  | 30.1 | 50.1  |
| chr3  | Arhgef2       | Upstream | N | 88419129  | 88420128  | 5 | 32.0 | 76.9  | 50.5 | 70.5  |
| chr3  | Lmo4          | Upstream | N | 143868220 | 143869219 | 1 | 18.4 | 42.9  | 10.7 | 30.6  |
| chr4  | Gm11413       | Upstream | N | 83036573  | 83037572  | 5 | 51.3 | 76.9  | 53.8 | 73.7  |
| chr16 | Gm16863       | Upstream | N | 21296946  | 21297945  | 5 | 57.1 | 79.7  | 52.5 | 72.4  |
| chr2  | Mga           | Upstream | N | 119721964 | 119722963 | 3 | 49.3 | 67.2  | 42.0 | 61.8  |
| chr1  | Itpkb         | Upstream | N | 182259607 | 182260606 | 5 | 16.8 | 62.6  | 41.0 | 60.7  |
| chr11 | Tmem88        | Upstream | N | 69211737  | 69212736  | 4 | 33.3 | 60.3  | 42.5 | 62.2  |
| chr7  | Ttll13        | Upstream | N | 87390262  | 87391261  | 3 | 35.0 | 100.0 | 24.5 | 44.1  |
| chr14 | Adam2         | Upstream | N | 66696571  | 66697570  | 5 | 69.9 | 85.2  | 59.8 | 79.3  |
| chr9  | Tipin         | Upstream | N | 64128414  | 64129413  | 3 | 41.6 | 63.6  | 46.6 | 66.1  |
| chr18 | 4930426D05Rik | Upstream | N | 21809066  | 21810065  | 4 | 13.4 | 57.4  | 34.5 | 54.0  |
| chr6  | Eif4e3        | Upstream | N | 99616766  | 99617765  | 2 | 56.0 | 73.6  | 51.8 | 71.3  |
| chr16 | Zdhhc8        | Upstream | N | 18235230  | 18236229  | 1 | 31.7 | 53.6  | 24.9 | 44.2  |
| chr7  | Olfir681      | Upstream | N | 112268973 | 112269972 | 5 | 55.7 | 95.5  | 77.8 | 97.0  |
| chr1  | Kdm5b         | Upstream | N | 136455755 | 136456754 | 3 | 64.0 | 81.0  | 62.1 | 81.2  |
| chr9  | Cln6          | Upstream | N | 62685594  | 62686593  | 3 | 13.2 | 43.8  | 18.2 | 37.2  |
| chr10 | Ikzf4         | Upstream | N | 128083050 | 128084049 | 3 | 30.8 | 46.7  | 30.9 | 49.9  |
| chr15 | Ank           | Upstream | N | 27395432  | 27396431  | 1 | 32.9 | 55.1  | 35.6 | 54.6  |
| chr7  | Insc          | Upstream | N | 121888280 | 121889279 | 4 | 34.6 | 76.7  | 41.0 | 59.9  |
| chr12 | F730035M05Rik | Upstream | N | 71327828  | 71328827  | 1 | 21.0 | 46.8  | 13.4 | 32.3  |
| chr9  | Ppp2r1b       | Upstream | N | 50664040  | 50665039  | 2 | 64.4 | 86.0  | 66.1 | 84.9  |
| chr8  | Nanos3        | Upstream | N | 86700452  | 86701451  | 5 | 69.2 | 87.3  | 64.7 | 83.5  |
| chr1  | Sec16b        | Upstream | N | 159435927 | 159436926 | 5 | 72.4 | 92.0  | 61.3 | 80.0  |
| chr7  | Car11         | Upstream | N | 52954337  | 52955336  | 2 | 60.0 | 90.1  | 64.2 | 82.8  |
| chr2  | Lrrn4         | Upstream | N | 132706599 | 132707598 | 5 | 23.8 | 46.2  | 22.6 | 41.2  |
| chr9  | Ooep          | Upstream | N | 78226396  | 78227395  | 5 | 62.6 | 85.2  | 64.5 | 83.0  |
| chr1  | Fzd7          | Upstream | N | 59537991  | 59538990  | 1 | 7.4  | 28.8  | 9.9  | 28.4  |
| chr3  | Synpo2        | Upstream | N | 122939068 | 122940067 | 3 | 13.5 | 40.3  | 24.0 | 42.4  |
| chr18 | Osbpl1a       | Upstream | N | 13100351  | 13101350  | 4 | 45.3 | 77.0  | 56.3 | 74.7  |

|       |               |                |   |           |           |   |      |       |      |       |
|-------|---------------|----------------|---|-----------|-----------|---|------|-------|------|-------|
| chr10 | Gdf11         | Upstream       | N | 128328775 | 128329774 | 1 | 36.9 | 66.4  | 36.1 | 54.5  |
| chr10 |               | 9-Mar Upstream | N | 126497241 | 126498240 | 1 | 32.0 | 48.8  | 41.9 | 60.3  |
| chr1  | Agxt          | Upstream       | N | 95030817  | 95031816  | 5 | 69.8 | 86.2  | 66.2 | 84.6  |
| chr1  | Gm5415        | Upstream       | N | 32604139  | 32605138  | 5 | 81.0 | 97.1  | 81.8 | 100.0 |
| chr6  | Lrtm2         | Upstream       | N | 119280785 | 119281784 | 3 | 4.3  | 55.1  | 23.7 | 41.8  |
| chr2  | Fam65c        | Upstream       | N | 167836094 | 167837093 | 5 | 43.2 | 76.6  | 51.7 | 69.9  |
| chr1  | Hhat          | Upstream       | N | 194597414 | 194598413 | 4 | 74.0 | 100.0 | 73.1 | 91.2  |
| chr2  | Gad2          | Upstream       | N | 22476847  | 22477846  | 3 | 9.5  | 30.2  | 9.2  | 27.3  |
| chr7  | Alg8          | Upstream       | N | 104519127 | 104520126 | 3 | 9.0  | 26.3  | 5.1  | 23.2  |
| chr6  | Mpp6          | Upstream       | N | 50059240  | 50060239  | 1 | 14.3 | 33.3  | 24.4 | 42.5  |
| chr5  | 2210019I11Rik | Upstream       | N | 148083098 | 148084097 | 5 | 60.7 | 77.0  | 59.5 | 77.2  |
| chr19 | Kat5          | Upstream       | N | 5610095   | 5611094   | 3 | 52.8 | 75.9  | 59.0 | 76.6  |
| chr12 | Flrt2         | Upstream       | N | 96929436  | 96930435  | 3 | 31.2 | 63.2  | 35.0 | 52.6  |
| chr4  | Map3k6        | Upstream       | N | 132795733 | 132796732 | 3 | 63.4 | 82.9  | 62.7 | 80.2  |
| chr3  | Abca4         | Upstream       | N | 121746378 | 121747377 | 5 | 48.7 | 66.5  | 49.6 | 67.1  |
| chr7  | Kcnq1ot1      | Upstream       | N | 150482453 | 150483452 | 4 | 25.7 | 62.9  | 42.9 | 60.3  |
| chr17 | Zfp870        | Upstream       | N | 33028549  | 33029548  | 5 | 0.6  | 47.6  | 41.6 | 58.9  |
| chr4  | Aqp7          | Upstream       | N | 40995170  | 40996169  | 5 | 72.0 | 89.9  | 70.8 | 88.1  |
| chr4  | Gpx7          | Upstream       | N | 108079319 | 108080318 | 4 | 35.6 | 63.1  | 48.4 | 65.6  |
| chr13 | Pfkip         | Upstream       | N | 6647971   | 6648970   | 3 | 32.5 | 49.5  | 34.3 | 51.5  |
| chr7  | Olf555        | Upstream       | N | 109806337 | 109807336 | 5 | 66.0 | 81.7  | 64.3 | 81.3  |
| chr14 | Stc1          | Upstream       | N | 69646346  | 69647345  | 5 | 38.0 | 76.3  | 18.1 | 35.0  |
| chr1  | Gm16880       | Upstream       | N | 138591788 | 138592787 | 5 | 39.5 | 70.5  | 65.3 | 82.1  |
| chr17 | Mmp25         | Upstream       | N | 23782237  | 23783236  | 3 | 37.5 | 52.9  | 45.0 | 61.9  |
| chr4  | Melk          | Upstream       | N | 44312789  | 44313788  | 4 | 43.3 | 68.4  | 44.5 | 61.3  |
| chr15 | Ppp1r1a       | Upstream       | N | 103368424 | 103369423 | 4 | 34.2 | 70.6  | 52.8 | 69.6  |
| chr7  | Stx1b         | Upstream       | N | 134968046 | 134969045 | 4 | 60.5 | 78.2  | 58.1 | 74.8  |
| chr7  | Cyp2a22       | Upstream       | N | 27724406  | 27725405  | 5 | 69.9 | 87.5  | 74.1 | 90.6  |
| chr4  | Mxra8         | Upstream       | N | 155212789 | 155213788 | 5 | 20.8 | 64.4  | 53.7 | 70.2  |
| chr13 | Irx4          | Upstream       | N | 73396945  | 73397944  | 2 | 56.9 | 77.1  | 49.0 | 65.5  |
| chr10 | H2afy2        | Upstream       | N | 61246613  | 61247612  | 2 | 38.8 | 66.4  | 34.8 | 51.1  |
| chr3  | Pdzk1         | Upstream       | N | 96632988  | 96633987  | 5 | 61.8 | 79.8  | 48.5 | 64.7  |
| chr2  | Ppp1r16b      | Upstream       | N | 158491469 | 158492468 | 5 | 41.6 | 74.3  | 43.9 | 59.9  |
| chr12 | Serpina1b     | Upstream       | N | 104976400 | 104977399 | 5 | 31.5 | 61.9  | 28.8 | 44.8  |
| chr11 | Pik3r5        | Upstream       | N | 68244627  | 68245626  | 5 | 33.8 | 62.4  | 35.8 | 51.7  |
| chr11 | 4930405P13Rik | Upstream       | N | 88766242  | 88767241  | 5 | 56.3 | 72.9  | 58.5 | 74.4  |
| chr7  | Erf           | Upstream       | N | 26035778  | 26036777  | 1 | 18.9 | 48.8  | 26.6 | 42.4  |
| chr2  | Tmem189       | Upstream       | N | 167487045 | 167488044 | 1 | 63.3 | 82.5  | 58.7 | 74.5  |
| chr5  | Tmem33        | Upstream       | N | 67650891  | 67651890  | 4 | 39.0 | 77.7  | 19.4 | 35.1  |
| chr19 | Plgrkt        | Upstream       | N | 29436362  | 29437361  | 2 | 21.3 | 42.5  | 30.1 | 45.8  |
| chr4  | Olf275        | Upstream       | N | 52837271  | 52838270  | 5 | 75.2 | 95.2  | 81.6 | 97.3  |
| chr17 | Calm2         | Upstream       | N | 87846276  | 87847275  | 2 | 37.9 | 67.8  | 36.3 | 52.0  |
| chr16 | Lca5l         | Upstream       | N | 96413865  | 96414864  | 3 | 43.1 | 64.7  | 39.4 | 55.1  |
| chr10 | Fam162b       | Upstream       | N | 51310267  | 51311266  | 4 | 47.3 | 62.9  | 62.5 | 78.1  |
| chr11 | Gm12228       | Upstream       | N | 54632421  | 54633420  | 5 | 48.0 | 74.1  | 53.0 | 68.6  |
| chr2  | 1700017J07Rik | Upstream       | N | 168802769 | 168803768 | 5 | 39.5 | 62.1  | 42.8 | 58.3  |
| chr5  | Slc46a3       | Upstream       | N | 148706379 | 148707378 | 3 | 39.1 | 62.6  | 35.5 | 50.9  |
| chr8  | Zfp868        | Upstream       | N | 72149448  | 72150447  | 4 | 49.9 | 76.1  | 41.0 | 56.4  |
| chr15 | Fam109b       | Upstream       | N | 82170609  | 82171608  | 2 | 39.8 | 62.1  | 42.0 | 57.3  |

|       |               |          |   |           |           |    |      |       |      |      |
|-------|---------------|----------|---|-----------|-----------|----|------|-------|------|------|
| chr4  | Slc30a2       | Upstream | N | 133897961 | 133898960 | 4  | 44.3 | 76.6  | 48.7 | 63.8 |
| chr6  | Zc3hav11      | Upstream | N | 38249260  | 38250259  | 3  | 40.9 | 69.2  | 55.6 | 70.7 |
| chr17 | Tulp1         | Exon1    | N | 28502016  | 28502088  | 2  | 45.9 | 66.7  | 29.0 | 76.5 |
| chr2  | Zcchc3        | Exon1    | N | 152237692 | 152240780 | 8  | 13.2 | 57.2  | 15.4 | 60.0 |
| chr4  | Mxra8         | Exon1    | N | 155213789 | 155213999 | 2  | 9.5  | 51.1  | 12.5 | 51.3 |
| chr4  | Gm8439        | Exon1    | N | 120261350 | 120261457 | 2  | 28.4 | 61.6  | 23.5 | 61.7 |
| chr3  | Mab2112       | Exon1    | N | 86349503  | 86352205  | 5  | 46.2 | 77.5  | 43.6 | 81.8 |
| chr13 | Pik3r1        | Exon1    | N | 102462138 | 102462602 | 3  | 25.4 | 59.2  | 12.6 | 48.3 |
| chr2  | Plcb2         | Exon1    | N | 118553974 | 118554174 | 2  | 31.6 | 62.1  | 35.0 | 69.4 |
| chr7  | Upk1a         | Exon1    | N | 31397406  | 31397493  | 2  | 38.5 | 63.2  | 17.2 | 50.0 |
| chr16 | Tnp2          | Exon1    | N | 10788358  | 10788748  | 3  | 45.8 | 61.4  | 42.8 | 75.6 |
| chr11 | Hes7          | Exon1    | N | 68933955  | 68934017  | 2  | 8.8  | 32.0  | 4.9  | 37.6 |
| chr14 | Slc39a2       | Exon1    | N | 52513285  | 52513589  | 2  | 18.7 | 61.2  | 23.5 | 55.4 |
| chr19 | Pkd2l1        | Exon1    | N | 44266530  | 44266932  | 2  | 61.9 | 85.7  | 53.6 | 84.6 |
| chr14 | Kcnk16        | Exon1    | N | 21088172  | 21088384  | 1  | 21.5 | 48.6  | 24.3 | 54.6 |
| chr17 | Lta           | Exon1    | N | 35342104  | 35342296  | 1  | 50.0 | 81.3  | 52.2 | 80.9 |
| chr7  | Qprt          | Exon1    | N | 134265487 | 134265543 | 2  | 27.8 | 57.7  | 22.8 | 51.1 |
| chr6  | Iqsec1        | Exon1    | N | 90759762  | 90760117  | 2  | 59.0 | 78.0  | 49.4 | 75.9 |
| chr2  | Spint3        | Exon1    | N | 164398720 | 164398956 | 2  | 45.8 | 67.3  | 43.5 | 68.7 |
| chr11 | Nlk           | Exon1    | N | 78509311  | 78510927  | 5  | 70.1 | 100.0 | 69.7 | 94.3 |
| chr2  | Sh2d3c        | Exon1    | N | 32576575  | 32576715  | 1  | 50.0 | 87.0  | 64.8 | 88.9 |
| chr17 | Myom1         | Exon1    | N | 71368897  | 71368991  | 1  | 17.6 | 33.1  | 14.8 | 38.7 |
| chr4  | Trim63        | Exon1    | N | 133871035 | 133871297 | 2  | 49.4 | 74.0  | 40.4 | 64.0 |
| chr7  | Plin1         | Exon1    | N | 86877628  | 86877662  | 1  | 58.3 | 86.4  | 69.4 | 92.2 |
| chr1  | Hdac4         | Exon1    | N | 94044833  | 94044970  | 2  | 60.0 | 78.7  | 53.2 | 75.0 |
| chr2  | Myo3b         | Exon1    | N | 69877183  | 69877209  | 2  | 48.3 | 90.3  | 57.8 | 79.5 |
| chr16 | 4932438H23Rik | Exon1    | N | 91069277  | 91069390  | 1  | 32.0 | 56.1  | 38.6 | 60.2 |
| chr11 | Sowaha        | Exon1    | N | 53290080  | 53293697  | 8  | 40.0 | 88.8  | 63.4 | 85.0 |
| chr2  | Ttc30b        | Exon1    | N | 75773907  | 75776519  | 12 | 80.0 | 96.9  | 59.6 | 80.7 |
| chr14 | Fam107a       | Exon1    | N | 9141999   | 9142290   | 2  | 19.5 | 66.1  | 24.7 | 45.7 |
| chr9  | Rbp1          | Exon1    | N | 98323380  | 98325470  | 8  | 10.2 | 65.6  | 38.4 | 58.9 |
| chr7  | Arhgef17      | Exon1    | N | 108077083 | 108080675 | 8  | 64.9 | 89.1  | 65.2 | 85.3 |
| chr9  | Pou2af1       | Exon1    | N | 51021795  | 51021906  | 2  | 30.9 | 72.0  | 38.4 | 58.1 |
| chr5  | Pilrb2        | Exon1    | N | 138312797 | 138312986 | 2  | 63.3 | 90.0  | 49.6 | 69.3 |
| chr5  | Sparcl1       | Exon1    | N | 104542396 | 104543107 | 4  | 73.8 | 89.7  | 69.1 | 88.6 |
| chr5  | Fbxo24        | Exon1    | N | 138066167 | 138066306 | 1  | 37.7 | 85.1  | 64.6 | 83.5 |
| chr15 | Amhr2         | Exon1    | N | 102275798 | 102275953 | 2  | 19.2 | 41.4  | 46.2 | 64.5 |
| chr1  | Arl4c         | Exon1    | N | 90594801  | 90598766  | 12 | 26.8 | 47.3  | 28.3 | 46.6 |
| chr6  | St7           | Exon1    | N | 17699216  | 17699614  | 3  | 41.2 | 56.7  | 41.2 | 59.5 |
| chr13 | Foxq1         | Exon1    | N | 31650039  | 31652843  | 3  | 24.4 | 42.3  | 22.0 | 40.0 |
| chr17 | Gm7325        | Exon1    | N | 45738960  | 45739051  | 1  | 18.3 | 36.7  | 19.7 | 37.7 |
| chr12 | Tgfb3         | Exon1    | N | 87418531  | 87419991  | 5  | 34.3 | 57.0  | 36.5 | 54.5 |
| chr16 | Tvp23a        | Exon1    | N | 10447023  | 10447443  | 3  | 15.1 | 33.7  | 16.4 | 34.3 |
| chr3  | Cd160         | Exon1    | N | 96633146  | 96633274  | 2  | 67.1 | 86.3  | 62.3 | 80.0 |
| chr11 | Abi3          | Exon1    | N | 95703723  | 95703790  | 1  | 23.9 | 59.2  | 31.5 | 49.1 |
| chr11 | Gngt2         | Exon1    | N | 95703609  | 95703740  | 1  | 23.9 | 59.2  | 31.5 | 49.1 |
| chr6  | Asb4          | Exon1    | N | 5333386   | 5333405   | 1  | 38.5 | 57.8  | 33.3 | 50.9 |
| chr13 | Homer1        | Exon1    | N | 94074450  | 94075257  | 2  | 7.5  | 35.0  | 17.4 | 34.1 |
| chr9  | Fut4          | Exon1    | N | 14552903  | 14556566  | 11 | 64.8 | 81.0  | 61.8 | 77.9 |



|       |               |       |   |           |           |    |      |       |      |      |
|-------|---------------|-------|---|-----------|-----------|----|------|-------|------|------|
| chr4  | Hpd1          | Exon1 | N | 116492512 | 116494113 | 4  | 65.3 | 82.9  | 65.2 | 81.0 |
| chr1  | Cfc1          | Exon1 | N | 34592493  | 34592800  | 2  | 20.5 | 45.5  | 36.4 | 52.1 |
| chr10 | Ado           | Exon1 | N | 67007259  | 67011703  | 16 | 58.1 | 80.5  | 59.7 | 75.2 |
| chr4  | 1700013G24Rik | Exon1 | N | 137009211 | 137009270 | 1  | 48.6 | 64.0  | 54.7 | 70.2 |
| chr17 | Pou5f1        | Exon1 | N | 35642977  | 35643428  | 3  | 63.7 | 84.1  | 69.5 | 84.9 |
| chr2  | Gm826         | Exon1 | N | 160152832 | 160153230 | 2  | 25.8 | 69.5  | 20.2 | 35.5 |
| chr13 | Spin1         | Exon1 | N | 51228168  | 51228230  | 2  | 80.0 | 100.0 | 82.9 | 98.0 |
| chr2  | Duoxa2        | Exon1 | N | 122125884 | 122125941 | 1  | 30.0 | 95.0  | 32.2 | 85.2 |
| chr1  | Igsf9         | Exon1 | N | 174414412 | 174414677 | 2  | 52.3 | 88.6  | 47.3 | 89.6 |
| chr2  | Slc20a1       | Exon1 | N | 129025185 | 129025800 | 3  | 21.3 | 73.9  | 33.2 | 73.1 |
| chr7  | Trpm4         | Exon1 | N | 52559979  | 52560084  | 1  | 50.0 | 65.9  | 50.7 | 88.9 |
| chr6  | Itpr1         | Exon1 | N | 108164197 | 108164272 | 1  | 17.4 | 53.6  | 14.5 | 50.5 |
| chr11 | Ehbp1         | Exon1 | N | 21907086  | 21907200  | 1  | 58.7 | 77.4  | 46.0 | 81.0 |
| chr1  | 4930487H11Rik | Exon1 | N | 62840970  | 62841045  | 1  | 36.7 | 82.7  | 37.9 | 72.6 |
| chr1  | Cnot11        | Exon1 | N | 39594261  | 39594425  | 1  | 49.3 | 68.0  | 32.8 | 67.1 |
| chr2  | Mdk           | Exon1 | N | 91770975  | 91771136  | 2  | 11.1 | 36.1  | 12.0 | 45.4 |
| chr12 | Serpina3h     | Exon1 | N | 105488350 | 105488967 | 3  | 52.1 | 96.2  | 13.5 | 46.7 |
| chr7  | Ino80e        | Exon1 | N | 134000740 | 134000856 | 1  | 5.7  | 24.1  | 10.1 | 41.5 |
| chr11 | Cbx8          | Exon1 | N | 118901246 | 118901312 | 1  | 42.2 | 68.1  | 45.9 | 77.2 |
| chr17 | Tiam2         | Exon1 | N | 3412632   | 3412750   | 1  | 39.3 | 64.7  | 39.5 | 70.0 |
| chr9  | Bcl9l         | Exon1 | N | 44307531  | 44307632  | 2  | 47.5 | 71.8  | 49.2 | 79.8 |
| chr6  | Pcyox1        | Exon1 | N | 86341670  | 86341822  | 1  | 38.6 | 60.4  | 34.6 | 65.2 |
| chr9  | Rbp2          | Exon1 | N | 98399135  | 98399313  | 1  | 33.3 | 64.5  | 35.1 | 62.9 |
| chr16 | Ttc3          | Exon1 | N | 94605519  | 94605673  | 2  | 34.2 | 50.0  | 24.0 | 50.0 |
| chr2  | Tasp1         | Exon1 | N | 139683438 | 139683511 | 1  | 79.2 | 95.7  | 69.8 | 95.1 |
| chr3  | Pygo2         | Exon1 | N | 89235049  | 89235098  | 2  | 27.9 | 54.5  | 10.5 | 35.6 |
| chr17 | Lta           | Exon1 | N | 35341320  | 35341419  | 1  | 68.1 | 97.5  | 69.7 | 94.2 |
| chr13 | Irx4          | Exon1 | N | 73402296  | 73402427  | 2  | 47.8 | 83.7  | 60.5 | 84.9 |
| chr9  | Apoa5         | Exon1 | N | 46077164  | 46077220  | 2  | 43.7 | 67.5  | 71.3 | 95.2 |
| chr15 | A4galt        | Exon1 | N | 83060944  | 83061087  | 2  | 61.6 | 83.0  | 59.3 | 82.1 |
| chr2  | 1700109F18Rik | Exon1 | N | 74552328  | 74552458  | 2  | 16.2 | 40.3  | 18.8 | 40.4 |
| chr4  | Epb4.1l4b     | Exon1 | N | 57077671  | 57077735  | 1  | 53.4 | 74.2  | 47.9 | 69.4 |
| chr17 | Epb4.1l3      | Exon1 | N | 69557199  | 69557416  | 2  | 55.3 | 72.4  | 55.5 | 77.0 |
| chr17 | Ltb           | Exon1 | N | 35331995  | 35332310  | 1  | 40.6 | 65.8  | 37.6 | 59.0 |
| chr2  | Myo3b         | Exon1 | N | 69877355  | 69877397  | 1  | 42.7 | 61.2  | 43.2 | 64.2 |
| chr7  | D430042O09Rik | Exon1 | N | 132871823 | 132871878 | 1  | 64.4 | 85.2  | 60.3 | 80.6 |
| chr6  | Klra1         | Exon1 | N | 130322839 | 130322942 | 1  | 32.4 | 50.0  | 35.6 | 55.6 |
| chr1  | Nsl1          | Exon1 | N | 192889054 | 192889132 | 1  | 27.1 | 60.0  | 41.5 | 61.3 |
| chr11 | Gm525         | Exon1 | N | 88936303  | 88936403  | 1  | 6.7  | 34.6  | 15.2 | 34.8 |
| chr5  | Agfg2         | Exon1 | N | 138105444 | 138105600 | 1  | 50.0 | 84.1  | 48.5 | 67.7 |
| chr3  | Cttnbp2nl     | Exon1 | N | 104810866 | 104810973 | 1  | 29.8 | 52.0  | 22.7 | 41.5 |
| chr2  | Gm16119       | Exon1 | N | 181315148 | 181315333 | 2  | 47.5 | 90.2  | 22.2 | 41.0 |
| chr12 | Frmd6         | Exon1 | N | 71964864  | 71965129  | 3  | 71.6 | 93.5  | 74.1 | 92.4 |
| chr10 | Il23a         | Exon1 | N | 127734134 | 127734280 | 1  | 57.1 | 74.2  | 62.2 | 80.4 |
| chr16 | Rcan1         | Exon1 | N | 92396111  | 92396270  | 1  | 55.9 | 79.5  | 62.7 | 81.0 |
| chr9  | Chrna5        | Exon1 | N | 54845819  | 54845970  | 1  | 29.0 | 62.7  | 37.5 | 55.7 |
| chr19 | 1700055N04Rik | Exon1 | N | 3963839   | 3964001   | 1  | 62.8 | 79.3  | 64.2 | 82.4 |
| chr12 | Trim9         | Exon1 | N | 71349252  | 71349414  | 1  | 46.3 | 64.7  | 40.6 | 58.6 |
| chr4  | Tox           | Exon1 | N | 6615966   | 6616117   | 1  | 50.6 | 67.5  | 54.1 | 71.7 |

|       |               |       |   |           |           |    |      |       |      |       |
|-------|---------------|-------|---|-----------|-----------|----|------|-------|------|-------|
| chr15 | A330009N23Rik | Exon1 | N | 101053912 | 101054064 | 2  | 26.2 | 50.2  | 20.6 | 38.1  |
| chr4  | Rere          | Exon1 | N | 149780305 | 149780773 | 4  | 64.6 | 81.0  | 60.7 | 78.1  |
| chr12 | Dnmt3a        | Exon1 | N | 3835027   | 3835260   | 2  | 32.6 | 61.2  | 40.5 | 57.8  |
| chr19 | 5830416P10Rik | Exon1 | N | 53519740  | 53519834  | 1  | 21.3 | 41.6  | 19.1 | 36.4  |
| chr19 | Snx15         | Exon1 | N | 6120486   | 6120743   | 1  | 39.2 | 80.7  | 42.2 | 59.4  |
| chr12 | Grhl1         | Exon1 | N | 25260779  | 25260965  | 1  | 35.1 | 83.3  | 55.9 | 72.8  |
| chr7  | Lrrc28        | Exon1 | N | 74674472  | 74674631  | 1  | 60.0 | 80.2  | 66.1 | 82.7  |
| chr15 | Yaf2          | Exon1 | N | 93116841  | 93116993  | 1  | 40.9 | 65.1  | 49.6 | 66.2  |
| chr9  | Snx22         | Exon1 | N | 65915320  | 65915387  | 1  | 47.6 | 65.8  | 43.6 | 59.8  |
| chr7  | Gas2          | Exon1 | N | 59143282  | 59143446  | 2  | 51.2 | 90.6  | 61.4 | 77.5  |
| chr6  | Pianp         | Exon1 | N | 124948936 | 124948995 | 2  | 31.6 | 53.4  | 36.8 | 52.7  |
| chr17 | Rrp1b         | Exon1 | N | 32182874  | 32182956  | 1  | 79.4 | 96.3  | 79.6 | 95.5  |
| chr19 | 4930526L06Rik | Exon1 | N | 11367130  | 11367302  | 1  | 47.3 | 80.5  | 56.9 | 72.7  |
| chr19 | Lipa          | 5-UTR | N | 34599333  | 34601964  | 10 | 10.8 | 93.8  | 9.7  | 60.3  |
| chr11 | Brip1         | 5-UTR | N | 86012467  | 86014695  | 9  | 61.9 | 100.0 | 50.0 | 100.0 |
| chr3  | Mab21l2       | 5-UTR | N | 86351614  | 86352205  | 1  | 52.6 | 73.9  | 39.3 | 87.1  |
| chr11 | Fbxo48        | 5-UTR | N | 16851413  | 16853378  | 7  | 9.3  | 46.6  | 3.8  | 48.7  |
| chr12 | Rps6kl1       | 5-UTR | N | 86490839  | 86492214  | 4  | 16.7 | 68.4  | 27.3 | 72.1  |
| chr1  | 4930487H11Rik | 5-UTR | N | 62841127  | 62841306  | 1  | 26.6 | 81.6  | 42.4 | 81.3  |
| chr4  | Gm8439        | 5-UTR | N | 120261350 | 120261409 | 1  | 28.4 | 61.6  | 23.5 | 61.7  |
| chr11 | Hes7          | 5-UTR | N | 68933955  | 68933975  | 1  | 7.4  | 35.7  | 3.1  | 41.1  |
| chr7  | Mir675        | 5-UTR | N | 149762969 | 149763052 | 1  | 64.4 | 81.9  | 51.1 | 87.2  |
| chr14 | Slc39a2       | 5-UTR | N | 52513285  | 52513474  | 1  | 6.0  | 45.8  | 7.0  | 41.7  |
| chr9  | Upk2          | 5-UTR | N | 44262790  | 44262850  | 1  | 23.8 | 55.2  | 34.4 | 67.6  |
| chr9  | Bcl9l         | 5-UTR | N | 44307219  | 44307606  | 1  | 47.5 | 71.8  | 49.2 | 79.8  |
| chr2  | Mir130a       | 5-UTR | N | 84581272  | 84581335  | 1  | 65.7 | 89.1  | 63.2 | 93.2  |
| chr5  | 2210019111Rik | 5-UTR | N | 148082796 | 148083097 | 2  | 46.2 | 70.9  | 40.4 | 69.5  |
| chr7  | Qprt          | 5-UTR | N | 134265500 | 134265543 | 1  | 27.8 | 57.7  | 22.8 | 51.1  |
| chr14 | Ndrp2         | 5-UTR | N | 52531216  | 52533163  | 6  | 30.6 | 53.3  | 37.2 | 65.0  |
| chr1  | Ormdl1        | 5-UTR | N | 53353939  | 53355822  | 7  | 34.2 | 56.8  | 71.0 | 97.6  |
| chr9  | Nek11         | 5-UTR | N | 105295352 | 105297617 | 10 | 9.8  | 50.3  | 29.2 | 55.4  |
| chr3  | Spry1         | 5-UTR | N | 37538872  | 37541531  | 5  | 13.7 | 34.5  | 16.5 | 42.6  |
| chr16 | Mir193b       | 5-UTR | N | 13449616  | 13449694  | 1  | 73.6 | 89.6  | 63.0 | 88.9  |
| chr13 | Irx4          | 5-UTR | N | 73397945  | 73402382  | 9  | 26.5 | 61.5  | 32.6 | 57.9  |
| chr5  | Gm16063       | 5-UTR | N | 120075951 | 120076039 | 1  | 23.8 | 62.1  | 31.1 | 56.1  |
| chr17 | Cldn6         | 5-UTR | N | 23816332  | 23818030  | 5  | 53.2 | 80.0  | 55.0 | 79.8  |
| chr2  | Sh2d3c        | 5-UTR | N | 32576575  | 32576678  | 1  | 50.0 | 87.0  | 64.8 | 88.9  |
| chr1  | Gm16880       | 5-UTR | N | 138592788 | 138592968 | 1  | 15.7 | 45.3  | 9.9  | 33.8  |
| chr9  | Fbxl12        | 5-UTR | N | 20443643  | 20449211  | 16 | 46.4 | 65.5  | 28.2 | 51.9  |
| chr10 | Ascc1         | 5-UTR | N | 59465553  | 59467566  | 6  | 7.0  | 52.7  | 34.2 | 57.9  |
| chr2  | Bmi1          | 5-UTR | N | 18598645  | 18603438  | 15 | 34.3 | 58.7  | 49.4 | 73.0  |
| chr4  | AW011738      | 5-UTR | N | 155577393 | 155580137 | 8  | 53.2 | 69.9  | 55.4 | 79.0  |
| chr9  | Stt3a         | 5-UTR | N | 36572727  | 36575163  | 9  | 45.7 | 61.4  | 61.6 | 84.8  |
| chr17 | Lta           | 5-UTR | N | 35341599  | 35342296  | 3  | 35.6 | 64.2  | 34.6 | 57.7  |
| chr6  | Vwf           | 5-UTR | N | 125502966 | 125504470 | 8  | 51.8 | 68.1  | 39.6 | 62.4  |
| chr7  | Serpinh1      | 5-UTR | N | 106497932 | 106501749 | 16 | 50.8 | 85.2  | 62.6 | 84.6  |
| chr3  | Ankrd50       | 5-UTR | N | 38382125  | 38383738  | 5  | 45.0 | 63.8  | 47.5 | 69.5  |
| chr1  | Mir30a        | 5-UTR | N | 23279108  | 23279178  | 1  | 29.3 | 50.0  | 29.9 | 51.9  |
| chr1  | Hdac4         | 5-UTR | N | 94044855  | 94044970  | 1  | 60.0 | 78.7  | 53.2 | 75.0  |

|       |               |       |   |           |           |    |      |      |      |      |
|-------|---------------|-------|---|-----------|-----------|----|------|------|------|------|
| chr2  | Myo3b         | 5-UTR | N | 69877183  | 69877202  | 1  | 48.3 | 90.3 | 57.8 | 79.5 |
| chr7  | Hrc           | 5-UTR | N | 52590639  | 52590796  | 1  | 44.9 | 68.0 | 56.3 | 77.8 |
| chr11 | Atp6v0a1      | 5-UTR | N | 100870766 | 100873134 | 8  | 34.0 | 60.3 | 27.3 | 48.8 |
| chr11 | Gm12228       | 5-UTR | N | 54633421  | 54633563  | 1  | 24.1 | 66.1 | 35.8 | 57.1 |
| chr2  | Pacsin3       | 5-UTR | N | 91096970  | 91100364  | 13 | 47.9 | 76.8 | 50.7 | 71.5 |
| chr9  | Rbp1          | 5-UTR | N | 98323380  | 98325397  | 8  | 10.2 | 65.6 | 38.4 | 58.9 |
| chr15 | Fam109b       | 5-UTR | N | 82171609  | 82173711  | 8  | 34.8 | 79.3 | 52.0 | 72.3 |
| chr4  | Trim63        | 5-UTR | N | 133871035 | 133871138 | 1  | 49.4 | 74.0 | 50.3 | 70.4 |
| chr6  | Ccdc37        | 5-UTR | N | 90377484  | 90378474  | 4  | 8.3  | 37.9 | 27.1 | 47.2 |
| chr12 | Tgfb3         | 5-UTR | N | 87418883  | 87419991  | 3  | 28.4 | 56.8 | 31.0 | 51.0 |
| chr9  | Pou2af1       | 5-UTR | N | 51021795  | 51021890  | 1  | 30.9 | 72.0 | 38.4 | 58.1 |
| chr2  | Gdf5          | 5-UTR | N | 155770792 | 155771100 | 2  | 59.7 | 92.0 | 64.5 | 84.1 |
| chr14 | Cdh24         | 5-UTR | N | 55258382  | 55260201  | 6  | 53.6 | 78.0 | 53.4 | 72.8 |
| chr15 | Nrbp2         | 5-UTR | N | 75920055  | 75920443  | 2  | 61.3 | 84.8 | 65.4 | 84.6 |
| chr5  | Fbxo24        | 5-UTR | N | 138066170 | 138066306 | 1  | 37.7 | 85.1 | 64.6 | 83.5 |
| chr17 | Kremen2       | 5-UTR | N | 23881993  | 23882796  | 2  | 13.6 | 29.5 | 16.3 | 34.9 |
| chr5  | Al839979      | 5-UTR | N | 31873557  | 31873770  | 1  | 9.7  | 26.8 | 2.8  | 21.1 |
| chr6  | St7           | 5-UTR | N | 17699216  | 17699592  | 2  | 41.2 | 56.7 | 41.2 | 59.5 |
| chr19 | Slc22a6       | 5-UTR | N | 8692486   | 8692785   | 1  | 38.6 | 63.3 | 39.7 | 57.9 |
| chr4  | Eno1          | 5-UTR | N | 149611306 | 149613590 | 8  | 8.8  | 38.8 | 14.8 | 32.9 |
| chr17 | Gm7325        | 5-UTR | N | 45738621  | 45739051  | 2  | 18.3 | 36.7 | 19.7 | 37.7 |
| chr16 | Tvp23a        | 5-UTR | N | 10447139  | 10447443  | 2  | 15.1 | 36.5 | 16.4 | 34.3 |
| chr5  | Sult1b1       | 5-UTR | N | 87964110  | 87967220  | 15 | 35.7 | 83.3 | 0.0  | 17.6 |
| chr17 | Gm6623        | 5-UTR | N | 36315722  | 36318309  | 9  | 34.5 | 55.7 | 38.3 | 55.4 |
| chr1  | Pkhd1         | 5-UTR | N | 20605405  | 20608138  | 14 | 24.4 | 42.0 | 30.5 | 47.3 |
| chr4  | Ccdc28b       | 5-UTR | N | 129300008 | 129301152 | 6  | 36.4 | 57.6 | 27.7 | 44.5 |
| chr4  | Angptl7       | 5-UTR | N | 147874399 | 147874571 | 1  | 53.0 | 78.4 | 67.6 | 84.2 |
| chr4  | Myom3         | 5-UTR | N | 135315630 | 135318434 | 13 | 61.6 | 82.7 | 64.0 | 80.4 |
| chr2  | Sec16a        | 5-UTR | N | 26297522  | 26300736  | 13 | 31.4 | 51.6 | 39.5 | 55.0 |
| chr2  | Cubn          | 5-UTR | N | 13413441  | 13413503  | 1  | 22.2 | 39.0 | 24.3 | 39.6 |
| chr5  | 2310034O05Rik | 5-UTR | N | 100639711 | 100640046 | 2  | 58.6 | 81.6 | 63.2 | 78.3 |
| chr14 | Pbrm1         | 5-UTR | N | 31832324  | 31838698  | 29 | 40.1 | 63.9 | 40.2 | 55.2 |

**Group 6-mDMR genes associated with methylation gain at gene body and 3' non-CGI**

| Chr   | Gene   | Region   | CGI | Start     | End       | #Bins | DNA Methylation Level (%) |      |             |      |
|-------|--------|----------|-----|-----------|-----------|-------|---------------------------|------|-------------|------|
|       |        |          |     |           |           |       | ISCs                      |      | Diff. Cells |      |
|       |        |          |     |           |           |       | P0                        | P21  | P0          | P21  |
| chr4  | Cdkn2c | LastExon | N   | 109333481 | 109334231 | 4     | 37.3                      | 86.7 | 19.9        | 82.9 |
| chr1  | Dtl    | LastExon | N   | 193361244 | 193363220 | 10    | 29.0                      | 45.0 | 39.5        | 83.2 |
| chr5  | Atraid | LastExon | N   | 31356636  | 31356996  | 1     | 28.1                      | 79.2 | 34.3        | 78.0 |
| chr2  | Myo3a  | LastExon | N   | 22473569  | 22473772  | 2     | 21.5                      | 46.8 | 14.2        | 57.1 |
| chr16 | 5-Sep  | LastExon | N   | 18621904  | 18622889  | 3     | 66.3                      | 85.5 | 49.7        | 87.3 |
| chr11 | Arl5c  | LastExon | N   | 97850894  | 97851653  | 5     | 36.6                      | 70.9 | 28.9        | 64.1 |
| chr11 | Vat1   | LastExon | N   | 101320062 | 101321590 | 8     | 33.5                      | 57.2 | 33.2        | 65.4 |
| chr5  | Drc1   | LastExon | N   | 30668777  | 30668993  | 2     | 20.0                      | 48.2 | 22.9        | 54.6 |
| chr4  | Cdkn2b | LastExon | N   | 88952198  | 88953223  | 3     | 49.2                      | 92.5 | 54.1        | 85.6 |
| chr17 | H2-Ke2 | LastExon | N   | 34075854  | 34076056  | 2     | 36.1                      | 57.4 | 35.8        | 67.2 |
| chr1  | Fzd5   | LastExon | N   | 64777132  | 64783427  | 21    | 37.4                      | 58.1 | 28.9        | 58.5 |
| chr2  | Sp5    | LastExon | N   | 70314081  | 70315783  | 1     | 24.0                      | 69.7 | 19.5        | 48.9 |

|       |               |          |   |           |           |    |      |      |      |      |
|-------|---------------|----------|---|-----------|-----------|----|------|------|------|------|
| chr19 | Arl3          | LastExon | N | 46605599  | 46605876  | 2  | 52.7 | 80.0 | 47.9 | 77.1 |
| chr5  | Card11        | LastExon | N | 141348953 | 141349483 | 1  | 22.9 | 59.8 | 30.1 | 59.1 |
| chr18 | Dsc3          | LastExon | N | 20119431  | 20122070  | 13 | 57.6 | 91.7 | 62.5 | 90.7 |
| chr10 | Map3k5        | LastExon | N | 19861329  | 19862556  | 7  | 53.3 | 75.6 | 49.9 | 77.8 |
| chr15 | Foxh1         | LastExon | N | 76498654  | 76499570  | 3  | 42.5 | 74.5 | 47.6 | 75.5 |
| chr1  | Fam5c         | LastExon | N | 148748131 | 148749602 | 8  | 53.4 | 75.9 | 60.6 | 87.6 |
| chr19 | Rab3il1       | LastExon | N | 10108947  | 10110076  | 6  | 9.1  | 62.9 | 60.3 | 86.9 |
| chr4  | Cga           | LastExon | N | 34854315  | 34854623  | 2  | 58.0 | 88.1 | 62.3 | 88.6 |
| chr11 | Wbp2          | LastExon | N | 115939887 | 115940910 | 6  | 62.2 | 86.9 | 58.6 | 84.1 |
| chr3  | Vps45         | LastExon | N | 95803755  | 95804074  | 2  | 43.3 | 65.1 | 47.0 | 72.5 |
| chr2  | Ccdc32        | LastExon | N | 118843515 | 118844900 | 7  | 72.5 | 93.6 | 69.2 | 93.7 |
| chr15 | Kifc2         | LastExon | N | 76497634  | 76498626  | 6  | 49.7 | 77.6 | 49.9 | 73.7 |
| chr11 | Zfp735        | LastExon | N | 73523972  | 73527310  | 11 | 48.7 | 66.7 | 34.6 | 57.1 |
| chr9  | Dnm2          | LastExon | N | 21311867  | 21312203  | 2  | 21.6 | 43.2 | 24.5 | 47.0 |
| chr9  | Mmp13         | LastExon | N | 7282018   | 7283333   | 7  | 75.6 | 91.9 | 73.9 | 96.2 |
| chr11 | Rhbdd3        | LastExon | N | 5005803   | 5006094   | 3  | 66.7 | 92.3 | 73.7 | 95.9 |
| chr9  | Gnai2         | LastExon | N | 107516469 | 107517429 | 5  | 62.5 | 82.3 | 57.4 | 79.6 |
| chr17 | Cd2ap         | LastExon | N | 42929900  | 42933318  | 16 | 65.0 | 88.0 | 64.9 | 87.0 |
| chr9  | Lars2         | LastExon | N | 123370617 | 123371782 | 4  | 31.9 | 53.4 | 41.0 | 62.9 |
| chr2  | Hoxd8         | LastExon | N | 74544571  | 74545364  | 3  | 26.2 | 53.1 | 30.8 | 52.4 |
| chr12 | A230065H16Rik | LastExon | N | 112649935 | 112650288 | 2  | 69.0 | 85.8 | 57.2 | 78.7 |
| chr11 | Krt20         | LastExon | N | 99289717  | 99290392  | 4  | 20.6 | 54.1 | 24.7 | 46.1 |
| chr14 | Ii17rb        | LastExon | N | 30809354  | 30810375  | 5  | 64.1 | 93.7 | 68.3 | 89.4 |
| chr2  | Pdhx          | LastExon | N | 102861213 | 102862426 | 6  | 64.9 | 83.3 | 62.5 | 83.4 |
| chr10 | Shmt2         | LastExon | N | 126954179 | 126954972 | 5  | 40.2 | 76.6 | 50.3 | 70.8 |
| chr2  | Foxa2         | LastExon | N | 147868614 | 147870560 | 3  | 30.4 | 84.3 | 29.7 | 50.0 |
| chr7  | Tmc7          | LastExon | N | 125679358 | 125681731 | 12 | 41.2 | 62.5 | 70.3 | 90.6 |
| chr6  | Ddx47         | LastExon | N | 134973297 | 134973794 | 3  | 27.7 | 50.1 | 29.6 | 49.8 |
| chr7  | 1600016N20Rik | LastExon | N | 148395942 | 148396103 | 2  | 71.5 | 87.4 | 71.3 | 91.3 |
| chr13 | Tnpo1         | LastExon | N | 99612036  | 99614575  | 13 | 76.2 | 92.7 | 76.5 | 96.4 |
| chr7  | Msx3          | LastExon | N | 147232056 | 147234039 | 7  | 58.8 | 75.5 | 50.3 | 70.0 |
| chr11 | Kdm6b         | LastExon | N | 69212020  | 69213351  | 5  | 33.3 | 60.3 | 42.5 | 62.2 |
| chr5  | Tbx3          | LastExon | N | 120132640 | 120134610 | 8  | 56.3 | 75.4 | 35.6 | 55.2 |
| chr8  | Aktip         | LastExon | N | 93647398  | 93648577  | 7  | 62.4 | 78.3 | 60.2 | 79.8 |
| chr9  | Chrna3        | LastExon | N | 54859150  | 54860736  | 8  | 61.5 | 86.7 | 65.3 | 84.8 |
| chr3  | Slc50a1       | LastExon | N | 89072168  | 89072520  | 2  | 67.9 | 87.1 | 58.9 | 78.4 |
| chr7  | Rplp2         | LastExon | N | 148637131 | 148637241 | 2  | 33.6 | 62.7 | 54.8 | 74.1 |
| chr11 | Cd7           | LastExon | N | 120898063 | 120898464 | 2  | 49.0 | 83.6 | 61.2 | 80.4 |
| chr3  | Spry1         | LastExon | N | 37541477  | 37543521  | 11 | 20.1 | 62.6 | 34.8 | 53.3 |
| chr1  | 2010300C02Rik | LastExon | N | 37668521  | 37669241  | 4  | 29.4 | 58.0 | 36.6 | 55.1 |
| chr17 | Vmn2r94       | LastExon | N | 18380534  | 18381465  | 5  | 58.6 | 76.6 | 51.2 | 69.3 |
| chr3  | Dkk2          | LastExon | N | 131840834 | 131843268 | 12 | 77.7 | 96.1 | 76.7 | 94.8 |
| chr5  | Vmn2r12       | LastExon | N | 109514868 | 109515730 | 4  | 60.9 | 95.7 | 77.5 | 95.5 |
| chr7  | Prkcdbp       | LastExon | N | 112629130 | 112629733 | 3  | 49.7 | 71.3 | 58.7 | 76.6 |
| chr2  | BC052040      | LastExon | N | 115602638 | 115604504 | 10 | 45.6 | 96.3 | 48.0 | 65.8 |
| chr9  | Rwdd2a        | LastExon | N | 86467581  | 86468506  | 4  | 79.2 | 95.1 | 66.9 | 84.6 |
| chr9  | Sema7a        | LastExon | N | 57809047  | 57810672  | 8  | 51.9 | 94.6 | 58.8 | 76.4 |
| chr6  | Nxph1         | LastExon | N | 9197085   | 9198578   | 8  | 67.4 | 86.1 | 67.9 | 85.5 |
| chr8  | Hpgd          | LastExon | N | 58798855  | 58799843  | 5  | 65.5 | 88.4 | 63.1 | 80.4 |

|       |               |               |   |           |           |     |      |      |      |       |
|-------|---------------|---------------|---|-----------|-----------|-----|------|------|------|-------|
| chr19 | Klc2          | LastExon      | N | 5107746   | 5108688   | 4   | 13.5 | 31.7 | 41.0 | 58.1  |
| chr4  | Eps15         | LastExon      | N | 109057924 | 109060421 | 13  | 80.8 | 97.6 | 78.7 | 95.8  |
| chr8  | Nwd1          | LastExon      | N | 75235492  | 75238645  | 15  | 52.2 | 70.9 | 67.2 | 83.5  |
| chr1  | BC026585      | LastExon      | N | 159418574 | 159418864 | 2   | 66.6 | 84.4 | 79.9 | 96.0  |
| chr11 | Ace           | LastExon      | N | 105850116 | 105851278 | 4   | 36.7 | 58.1 | 36.4 | 52.4  |
| chr8  | Nfix          | LastExon      | N | 87231498  | 87232576  | 6   | 0.4  | 44.3 | 3.6  | 19.5  |
| chr17 | 2300002M23Rik | LastExon      | N | 35704779  | 35705890  | 6   | 21.0 | 40.4 | 27.2 | 42.7  |
| chr8  | Ccl17         | LastExon      | N | 97335660  | 97335936  | 2   | 64.5 | 80.6 | 67.0 | 82.4  |
| chr8  | Gtf2e2        | LastExon      | N | 34886925  | 34887645  | 4   | 12.5 | 61.2 | 21.2 | 36.6  |
| chr19 | Lipa          | Intron9       | N | 34599337  | 34601855  | 10  | 10.8 | 93.8 | 9.7  | 60.3  |
| chr6  | Lrp6          | Intron9       | N | 134417718 | 134418660 | 5   | 42.9 | 90.0 | 40.9 | 75.0  |
| chr16 |               | 5-Sep Intron9 | N | 18625349  | 18625437  | 1   | 24.2 | 90.9 | 49.3 | 80.5  |
| chr15 | Col22a1       | Intron9       | N | 71646429  | 71650460  | 20  | 55.0 | 77.1 | 53.8 | 85.0  |
| chr18 | Zfp608        | Intron9       | N | 55148361  | 55149481  | 7   | 14.3 | 42.5 | 13.9 | 40.6  |
| chr9  | Vwa5a         | Intron9       | N | 38535428  | 38535578  | 1   | 41.2 | 58.1 | 37.8 | 63.1  |
| chr8  | Nfix          | Intron9       | N | 87296215  | 87323896  | 120 | 45.5 | 69.3 | 44.4 | 69.5  |
| chr7  | Capns1        | Intron9       | N | 30977920  | 30978896  | 3   | 31.7 | 56.6 | 32.1 | 56.7  |
| chr4  | Tmco4         | Intron9       | N | 138575586 | 138575960 | 2   | 48.8 | 65.1 | 46.3 | 69.7  |
| chr17 | Efhb          | Intron9       | N | 53585181  | 53588709  | 18  | 72.2 | 90.7 | 70.8 | 93.7  |
| chr4  | Espn          | Intron9       | N | 151507066 | 151508269 | 6   | 60.4 | 75.7 | 52.0 | 73.2  |
| chr17 | Catsperd      | Intron9       | N | 56790317  | 56791217  | 5   | 28.2 | 69.0 | 48.0 | 69.2  |
| chr17 | Rgs11         | Intron9       | N | 26342721  | 26344243  | 8   | 50.8 | 81.5 | 63.7 | 84.3  |
| chr8  | Ces1a         | Intron9       | N | 95557932  | 95559850  | 10  | 3.1  | 19.1 | 8.8  | 29.3  |
| chr6  | Dqx1          | Intron9       | N | 83014638  | 83014787  | 1   | 10.4 | 45.5 | 24.4 | 43.7  |
| chr7  | Adck4         | Intron9       | N | 28027313  | 28028321  | 5   | 46.8 | 63.4 | 47.1 | 66.3  |
| chr11 | Rufy1         | Intron9       | N | 50219986  | 50221324  | 7   | 39.9 | 65.2 | 68.6 | 87.4  |
| chr4  | Rap1gap       | Intron9       | N | 137272489 | 137273312 | 4   | 40.2 | 70.4 | 44.6 | 63.4  |
| chr17 | Kremen2       | Intron9       | N | 23882071  | 23882705  | 2   | 13.6 | 29.5 | 16.3 | 34.9  |
| chr8  | Tsnaxip1      | Intron9       | N | 108365706 | 108365781 | 1   | 75.0 | 96.3 | 82.1 | 100.0 |
| chr4  | Aldh4a1       | Intron9       | N | 139196602 | 139197991 | 7   | 73.4 | 88.5 | 57.8 | 75.4  |
| chr1  | Mdm4          | Intron9       | N | 134909289 | 134915353 | 29  | 64.0 | 93.5 | 75.3 | 92.9  |
| chr5  | Cep135        | Intron9       | N | 77038795  | 77040674  | 9   | 19.4 | 39.5 | 30.1 | 46.6  |
| chr11 | Mapt          | Intron9       | N | 104179564 | 104182664 | 13  | 57.1 | 86.7 | 61.9 | 77.7  |
| chr8  | Tmem184c      | Intron9       | N | 80130317  | 80134001  | 17  | 52.8 | 69.9 | 71.1 | 86.7  |
| chr5  | Ppargc1a      | Intron9       | N | 51886045  | 51886908  | 4   | 53.8 | 85.4 | 59.4 | 74.6  |
| chr11 | Gabra1        | Intron8       | N | 41989514  | 41993061  | 14  | 57.6 | 74.5 | 27.6 | 75.0  |
| chr8  | Col4a2        | Intron8       | N | 11402235  | 11402983  | 4   | 18.8 | 63.7 | 51.1 | 93.7  |
| chr12 | lfrd1         | Intron8       | N | 40940723  | 40942776  | 10  | 41.3 | 59.6 | 34.3 | 68.2  |
| chr15 | Baiap2l2      | Intron8       | N | 79101083  | 79101631  | 1   | 14.2 | 55.9 | 14.2 | 43.0  |
| chr10 | Syne1         | Intron8       | N | 5184208   | 5184979   | 4   | 32.1 | 94.2 | 32.7 | 60.7  |
| chr12 | Ptgr2         | Intron8       | N | 85649383  | 85651868  | 12  | 47.5 | 64.5 | 41.0 | 68.5  |
| chr11 | Slc22a4       | Intron8       | N | 53819051  | 53821269  | 11  | 59.5 | 90.1 | 58.9 | 85.6  |
| chr6  | Ppp1r9a       | Intron8       | N | 5061054   | 5063600   | 12  | 11.9 | 51.3 | 39.0 | 65.6  |
| chr7  | Trpm4         | Intron8       | N | 52564601  | 52565646  | 5   | 35.0 | 58.3 | 59.6 | 85.6  |
| chr19 | Rtn3          | Intron8       | N | 7542358   | 7557428   | 70  | 50.3 | 74.1 | 39.9 | 64.7  |
| chr17 | 4930539E08Rik | Intron8       | N | 29042441  | 29042635  | 1   | 49.7 | 73.4 | 49.7 | 74.1  |
| chr14 | Sh3bp5        | Intron8       | N | 32247332  | 32248996  | 4   | 51.3 | 68.7 | 42.9 | 66.1  |
| chr6  | Mpp6          | Intron8       | N | 50128520  | 50130174  | 8   | 39.3 | 67.4 | 59.5 | 81.2  |
| chr5  | Ppargc1a      | Intron8       | N | 51881485  | 51885839  | 20  | 75.6 | 90.9 | 58.3 | 79.3  |

|       |               |          |   |           |           |    |      |      |      |      |
|-------|---------------|----------|---|-----------|-----------|----|------|------|------|------|
| chr1  | Lamc2         | Intron8  | N | 154980879 | 154981906 | 5  | 51.6 | 76.1 | 46.5 | 67.3 |
| chr12 | G2e3          | Intron8  | N | 52462035  | 52464172  | 11 | 80.2 | 97.6 | 75.9 | 96.0 |
| chr9  | Ecsit         | Intron8  | N | 21888653  | 21889800  | 4  | 77.3 | 97.8 | 70.1 | 90.0 |
| chr7  | Capns1        | Intron8  | N | 30977612  | 30977885  | 1  | 78.0 | 97.1 | 73.4 | 92.1 |
| chr10 | Mfsd12        | Intron8  | N | 80825773  | 80826297  | 3  | 35.7 | 55.0 | 40.5 | 59.1 |
| chr5  | Tmem184a      | Intron8  | N | 140289147 | 140290006 | 4  | 21.0 | 45.0 | 7.6  | 25.3 |
| chr3  | Gucy1b3       | Intron8  | N | 81848168  | 81849320  | 6  | 67.0 | 88.5 | 64.4 | 81.0 |
| chr4  | Serinc2       | Intron8  | N | 129941696 | 129942312 | 1  | 27.9 | 49.4 | 20.0 | 35.8 |
| chr4  | Adamtsl1      | Intron8  | N | 85873959  | 85878456  | 22 | 66.1 | 84.6 | 67.4 | 82.9 |
| chr2  | Lrp2          | Intron77 | N | 69389010  | 69390409  | 7  | 61.2 | 76.7 | 78.4 | 94.3 |
| chr1  | Ush2a         | Intron70 | N | 190786819 | 190788717 | 9  | 62.7 | 83.9 | 64.6 | 87.6 |
| chr9  | Zfp810        | Intron7  | N | 22110047  | 22111992  | 8  | 12.1 | 29.0 | 16.2 | 57.2 |
| chr15 | Naga          | Intron7  | N | 82167372  | 82167816  | 2  | 44.2 | 84.0 | 28.6 | 68.3 |
| chr15 | Cyb5r3        | Intron7  | N | 82992735  | 82996504  | 18 | 48.6 | 93.2 | 54.1 | 93.8 |
| chr8  | Mau2          | Intron7  | N | 72547597  | 72549726  | 11 | 32.0 | 95.8 | 33.9 | 73.0 |
| chr2  | Sh2d3c        | Intron7  | N | 32605206  | 32606471  | 6  | 57.9 | 77.1 | 36.9 | 73.0 |
| chr1  | Espnl         | Intron7  | N | 93238521  | 93239117  | 3  | 61.7 | 88.9 | 57.1 | 91.4 |
| chr19 | Sufu          | Intron7  | N | 46527806  | 46529224  | 7  | 36.7 | 82.0 | 49.7 | 81.5 |
| chr6  | Scnn1a        | Intron7  | N | 125289242 | 125292619 | 17 | 61.4 | 93.1 | 60.9 | 91.5 |
| chr19 | Aldh3b2       | Intron7  | N | 3979617   | 3980005   | 2  | 50.0 | 70.2 | 54.7 | 83.3 |
| chr15 | Galnt6        | Intron7  | N | 100534014 | 100534541 | 2  | 58.5 | 75.9 | 49.1 | 76.9 |
| chr1  | Susd4         | Intron7  | N | 184822397 | 184825329 | 15 | 43.2 | 66.2 | 66.8 | 94.2 |
| chr8  | Frem3         | Intron7  | N | 83214721  | 83219025  | 21 | 72.5 | 87.9 | 62.5 | 89.2 |
| chr17 | BC004004      | Intron7  | N | 29433635  | 29435586  | 10 | 36.2 | 66.1 | 37.5 | 63.2 |
| chr7  | Trim21        | Intron7  | N | 109712855 | 109713902 | 6  | 27.3 | 44.7 | 28.7 | 53.2 |
| chr11 | Larp1         | Intron7  | N | 57856409  | 57857407  | 5  | 66.0 | 83.7 | 70.2 | 92.4 |
| chr5  | Setd8         | Intron7  | N | 124909975 | 124910496 | 3  | 28.8 | 43.8 | 60.9 | 82.9 |
| chr5  | Stim2         | Intron7  | N | 54496638  | 54500941  | 22 | 55.3 | 71.1 | 55.1 | 76.9 |
| chr11 | Aatf          | Intron7  | N | 84284789  | 84286553  | 9  | 24.5 | 76.8 | 53.7 | 73.5 |
| chr3  | Larp7         | Intron7  | N | 127249322 | 127249393 | 1  | 53.1 | 79.5 | 61.9 | 80.9 |
| chr2  | 1700019L03Rik | Intron7  | N | 32636316  | 32636873  | 3  | 22.7 | 45.6 | 53.5 | 71.5 |
| chr5  | Sult1b1       | Intron7  | N | 87964122  | 87967129  | 15 | 35.7 | 83.3 | 0.0  | 17.6 |
| chr11 | Galk1         | Intron7  | N | 115872531 | 115873827 | 5  | 27.8 | 53.6 | 18.9 | 36.5 |
| chr17 | Rgs11         | Intron7  | N | 26341873  | 26342052  | 1  | 51.6 | 73.1 | 59.0 | 76.4 |
| chr6  | Atg7          | Intron7  | N | 114634540 | 114636091 | 8  | 41.9 | 64.5 | 51.8 | 68.6 |
| chr14 | Lmo7          | Intron7  | N | 102280219 | 102283378 | 16 | 44.0 | 75.2 | 53.9 | 70.6 |
| chr10 | Ikzf4         | Intron7  | N | 128081025 | 128082776 | 8  | 66.1 | 83.7 | 67.0 | 83.0 |
| chr1  | Ncstn         | Intron7  | N | 174000280 | 174001381 | 6  | 75.0 | 90.8 | 69.9 | 85.8 |
| chr4  | Serinc2       | Intron7  | N | 129940906 | 129941504 | 3  | 75.6 | 91.0 | 75.7 | 91.4 |
| chr8  | Gtf2e2        | Intron7  | N | 34886532  | 34886924  | 2  | 60.8 | 78.6 | 71.3 | 86.8 |
| chr8  | Itfg1         | Intron7  | N | 88262125  | 88264126  | 10 | 75.1 | 94.3 | 78.3 | 93.8 |
| chr2  | Scn1a         | Intron7  | N | 66134933  | 66137680  | 14 | 64.5 | 80.2 | 66.9 | 81.9 |
| chr5  | Gm15800       | Intron67 | N | 121808344 | 121809305 | 5  | 65.0 | 90.5 | 74.9 | 94.9 |
| chr1  | Pkhd1         | Intron66 | N | 20605487  | 20607991  | 13 | 28.4 | 50.3 | 35.4 | 54.5 |
| chr4  | Vps13d        | Intron64 | N | 144763062 | 144764711 | 8  | 63.0 | 83.9 | 79.1 | 94.2 |
| chr5  | Atraid        | Intron6  | N | 31356432  | 31356635  | 1  | 28.1 | 79.2 | 34.3 | 78.0 |
| chr17 | Tfeb          | Intron6  | N | 47925243  | 47925857  | 3  | 56.4 | 75.3 | 36.7 | 69.8 |
| chr13 | Mef2c         | Intron6  | N | 83772845  | 83775024  | 10 | 54.3 | 86.4 | 60.7 | 92.8 |
| chr16 | Usp16         | Intron6  | N | 87470108  | 87470598  | 2  | 64.3 | 94.2 | 66.1 | 96.2 |

|       |               |          |   |           |           |    |      |      |      |      |
|-------|---------------|----------|---|-----------|-----------|----|------|------|------|------|
| chr2  | Ubox5         | Intron6  | N | 130454372 | 130455651 | 5  | 0.0  | 34.0 | 48.1 | 77.0 |
| chr10 | Specc1l       | Intron6  | N | 74720687  | 74721712  | 5  | 44.0 | 73.7 | 46.3 | 75.1 |
| chr16 | Liph          | Intron6  | N | 21974221  | 21976305  | 9  | 55.9 | 73.0 | 48.7 | 76.0 |
| chr16 | Tbx1          | Intron6  | N | 18585230  | 18586628  | 4  | 25.8 | 63.0 | 30.8 | 57.6 |
| chr15 | Slc45a2       | Intron6  | N | 10955689  | 10957469  | 9  | 70.4 | 87.0 | 69.8 | 93.4 |
| chr2  | 1700001O22Rik | Intron6  | N | 30656522  | 30659069  | 7  | 74.4 | 92.7 | 71.9 | 94.5 |
| chr7  | Myh14         | Intron6  | N | 51869101  | 51869662  | 3  | 48.5 | 67.9 | 44.6 | 67.0 |
| chr18 | Cndp2         | Intron6  | N | 84841551  | 84844368  | 14 | 50.8 | 82.5 | 48.2 | 70.2 |
| chr4  | Ccdc24        | Intron6  | N | 117544466 | 117544593 | 1  | 48.0 | 78.6 | 41.9 | 63.2 |
| chr4  | Rcc2          | Intron6  | N | 140268590 | 140269313 | 4  | 51.5 | 85.8 | 64.2 | 85.4 |
| chr11 | Bahcc1        | Intron6  | N | 120134738 | 120135007 | 1  | 73.0 | 88.9 | 71.4 | 92.5 |
| chr11 | Spns3         | Intron6  | N | 72350183  | 72350672  | 2  | 65.0 | 85.4 | 59.3 | 80.0 |
| chr4  | Ttll10        | Intron6  | N | 155419000 | 155419433 | 2  | 43.5 | 59.3 | 39.0 | 59.2 |
| chr14 | 9930012K11Rik | Intron6  | N | 70557462  | 70559138  | 6  | 22.6 | 58.0 | 51.8 | 70.9 |
| chr17 | Snx9          | Intron6  | N | 5902515   | 5904888   | 12 | 43.7 | 71.7 | 66.7 | 85.2 |
| chr18 | Dnajc18       | Intron6  | N | 35856778  | 35860457  | 18 | 75.8 | 94.0 | 68.6 | 87.1 |
| chr13 | Slc34a1       | Intron6  | N | 55504141  | 55504265  | 1  | 68.8 | 87.2 | 67.6 | 86.0 |
| chr16 | Urb1          | Intron6  | N | 90760188  | 90760635  | 2  | 57.7 | 73.6 | 55.4 | 73.6 |
| chr16 | Bcl6          | Intron6  | N | 23973306  | 23974898  | 8  | 64.6 | 88.5 | 73.1 | 91.2 |
| chr11 | Cpsf4l        | Intron6  | N | 113570169 | 113571135 | 6  | 56.8 | 77.9 | 48.8 | 66.8 |
| chr12 | Rad51b        | Intron6  | N | 80426074  | 80428207  | 11 | 40.0 | 85.9 | 55.7 | 73.5 |
| chr5  | Noa1          | Intron6  | N | 77736743  | 77737931  | 5  | 43.9 | 67.9 | 43.8 | 61.3 |
| chr2  | Tyro3         | Intron6  | N | 119631467 | 119633570 | 11 | 63.8 | 82.7 | 63.1 | 80.4 |
| chr2  | Dnm1          | Intron6  | N | 32171431  | 32172417  | 5  | 14.3 | 40.9 | 21.7 | 39.0 |
| chr1  | Farp2         | Intron6  | N | 95464092  | 95465657  | 8  | 28.7 | 49.0 | 46.0 | 63.3 |
| chr2  | Nabl          | Intron6  | N | 17651091  | 17652419  | 4  | 2.8  | 22.2 | 8.3  | 24.8 |
| chr8  | Tpte          | Intron6  | N | 23416367  | 23417407  | 4  | 72.0 | 89.6 | 73.8 | 89.5 |
| chr2  | Fmn1          | Intron6  | N | 113366099 | 113369469 | 17 | 78.4 | 94.7 | 83.2 | 98.9 |
| chr2  | Nr4a2         | Intron6  | N | 56964853  | 56965361  | 3  | 36.8 | 57.0 | 36.0 | 51.4 |
| chr11 | Aftph         | Intron6  | N | 20609750  | 20612166  | 12 | 65.8 | 83.9 | 64.0 | 79.1 |
| chr8  | Acta1         | Intron6  | N | 126417610 | 126418321 | 4  | 48.6 | 71.6 | 51.6 | 66.8 |
| chr11 | Galk1         | Intron6  | N | 115871997 | 115872340 | 2  | 62.5 | 80.6 | 72.7 | 87.8 |
| chr15 | Vps13b        | Intron57 | N | 35844706  | 35846801  | 10 | 60.2 | 77.9 | 74.5 | 90.2 |
| chr11 | Zzef1         | Intron54 | N | 72736684  | 72738138  | 7  | 32.1 | 84.6 | 59.6 | 79.3 |
| chr7  | Serpinh1      | Intron5  | N | 106500378 | 106501562 | 4  | 31.8 | 84.5 | 31.2 | 78.1 |
| chr6  | Styk1         | Intron5  | N | 131257173 | 131259900 | 14 | 6.1  | 59.4 | 58.2 | 96.9 |
| chr9  | Smad3         | Intron5  | N | 63511523  | 63513954  | 12 | 23.9 | 51.4 | 34.1 | 68.7 |
| chr1  | Lamc2         | Intron5  | N | 154977281 | 154977779 | 2  | 36.5 | 70.4 | 35.0 | 68.6 |
| chr7  | Ccdc61        | Intron5  | N | 19477933  | 19478346  | 1  | 30.7 | 57.5 | 29.9 | 60.6 |
| chr2  | Hoxd4         | Intron5  | N | 74565763  | 74566318  | 2  | 14.9 | 86.9 | 23.6 | 53.6 |
| chr10 | 2610008E11Rik | Intron5  | N | 78557303  | 78560202  | 13 | 43.2 | 80.0 | 43.8 | 72.6 |
| chr5  | Rell1         | Intron5  | N | 64327334  | 64329044  | 9  | 57.5 | 77.1 | 53.0 | 80.8 |
| chr3  | Ppm1j         | Intron5  | N | 104587046 | 104587551 | 3  | 69.4 | 84.9 | 56.6 | 84.4 |
| chr6  | Pon3          | Intron5  | N | 5186999   | 5190812   | 19 | 81.3 | 96.8 | 68.9 | 96.4 |
| chr2  | Dnm1          | Intron5  | N | 32170868  | 32171318  | 2  | 61.3 | 96.3 | 51.2 | 78.6 |
| chr4  | Cd164l2       | Intron5  | N | 132779663 | 132780166 | 3  | 17.1 | 66.7 | 31.3 | 57.1 |
| chr6  | E230016M11Rik | Intron5  | N | 67027360  | 67028220  | 4  | 48.0 | 68.5 | 49.9 | 75.6 |
| chr6  | Ica1          | Intron5  | N | 8606409   | 8608219   | 8  | 51.0 | 74.7 | 54.4 | 79.0 |
| chr11 | Gm11978       | Intron5  | N | 6559649   | 6560086   | 2  | 42.9 | 61.4 | 52.2 | 76.3 |

|       |               |               |   |           |           |    |      |      |      |      |
|-------|---------------|---------------|---|-----------|-----------|----|------|------|------|------|
| chr19 | Rab1b         | Intron5       | N | 5105251   | 5106924   | 6  | 3.3  | 24.4 | 29.8 | 53.5 |
| chr14 | Ecd           | Intron5       | N | 21148212  | 21149175  | 5  | 72.5 | 88.5 | 66.8 | 90.2 |
| chr6  | Foxp1         | Intron5       | N | 98894715  | 98895340  | 3  | 48.2 | 64.5 | 51.4 | 74.4 |
| chr8  | Nfix          | Intron5       | N | 87250505  | 87251022  | 3  | 60.0 | 75.5 | 63.2 | 86.0 |
| chr5  | Cad           | Intron5       | N | 31361496  | 31361805  | 2  | 55.6 | 71.1 | 54.1 | 75.6 |
| chr5  | Stard13       | Intron5       | N | 151849554 | 151850166 | 3  | 9.7  | 41.7 | 25.6 | 46.3 |
| chr2  | Prdm11        | Intron5       | N | 92853574  | 92853921  | 2  | 49.9 | 80.7 | 66.7 | 86.9 |
| chr17 | Mocs1         | Intron5       | N | 49588487  | 49588759  | 1  | 58.9 | 78.0 | 61.5 | 80.9 |
| chr10 | Ube2d1        | Intron5       | N | 70724864  | 70724946  | 1  | 78.8 | 97.4 | 79.4 | 98.4 |
| chr1  | Nr5a2         | Intron5       | N | 138840006 | 138841535 | 8  | 54.3 | 71.8 | 53.1 | 71.9 |
| chr6  | Slc41a3       | Intron5       | N | 90583750  | 90585243  | 7  | 69.4 | 86.1 | 74.8 | 93.5 |
| chr6  | Cpa2          | Intron5       | N | 30497207  | 30499241  | 10 | 71.4 | 89.4 | 71.1 | 89.7 |
| chr16 | Pla1a         | Intron5       | N | 38407846  | 38409680  | 9  | 67.4 | 90.8 | 62.5 | 81.0 |
| chr19 | Slc1a1        | Intron5       | N | 28970617  | 28971996  | 7  | 52.4 | 83.3 | 62.1 | 80.7 |
| chr1  | Stau2         | Intron5       | N | 16359968  | 16364754  | 23 | 71.2 | 87.0 | 64.2 | 82.6 |
| chr13 | Tspan17       | Intron5       | N | 54896540  | 54896771  | 1  | 41.1 | 56.7 | 42.7 | 60.6 |
| chr2  | Nr4a2         | Intron5       | N | 56963178  | 56963986  | 3  | 29.7 | 58.4 | 36.8 | 54.3 |
| chr4  | Ccdc28b       | Intron5       | N | 129300032 | 129301057 | 6  | 36.4 | 57.6 | 27.7 | 44.5 |
| chr14 | Tinf2         | Intron5       | N | 56299545  | 56299631  | 1  | 73.0 | 93.8 | 70.4 | 87.0 |
| chr2  | Neb           | Intron5       | N | 52004798  | 52005109  | 2  | 66.7 | 90.9 | 80.0 | 95.7 |
| chr9  | Gsta4         | Intron5       | N | 78053861  | 78055607  | 9  | 69.3 | 87.0 | 76.0 | 91.6 |
| chr17 | Prss22        | Intron5       | N | 24134305  | 24134889  | 3  | 64.0 | 91.1 | 62.1 | 77.5 |
| chr15 | Cela1         | Intron5       | N | 100515137 | 100515564 | 2  | 48.7 | 66.0 | 44.3 | 59.4 |
| chr1  | Ncf2          | Intron5       | N | 154671455 | 154673011 | 8  | 76.3 | 96.9 | 79.8 | 94.9 |
| chr1  | Tpr           | Intron49      | N | 152293372 | 152294641 | 6  | 8.7  | 62.5 | 11.1 | 82.6 |
| chr15 | Lrrk2         | Intron48      | N | 91641576  | 91642622  | 5  | 44.2 | 78.8 | 38.2 | 54.0 |
| chr13 | Lyst          | Intron45      | N | 13839070  | 13844209  | 24 | 68.9 | 91.1 | 72.1 | 89.2 |
| chr5  | Zan           | Intron42      | N | 137858408 | 137860270 | 9  | 37.5 | 55.1 | 61.0 | 79.9 |
| chr5  | Rbm48         | Intron4       | N | 3595446   | 3595965   | 2  | 3.0  | 64.9 | 4.0  | 44.5 |
| chr2  | Gad2          | Intron4       | N | 22480552  | 22484910  | 22 | 46.0 | 82.4 | 33.9 | 68.1 |
| chr2  |               | 7-Mar Intron4 | N | 60070425  | 60071955  | 8  | 40.8 | 70.7 | 49.5 | 83.7 |
| chr2  | Nr4a2         | Intron4       | N | 56962689  | 56963047  | 2  | 52.6 | 70.6 | 37.5 | 71.4 |
| chr9  | Tcaim         | Intron4       | N | 122723707 | 122727891 | 21 | 56.5 | 75.0 | 60.4 | 92.2 |
| chr2  | Gm14318       | Intron4       | N | 180074072 | 180074512 | 2  | 65.0 | 88.6 | 53.2 | 83.9 |
| chr11 | Ddc           | Intron4       | N | 11722297  | 11724851  | 13 | 56.3 | 83.7 | 51.8 | 82.5 |
| chr9  | Trf           | Intron4       | N | 103117588 | 103118143 | 3  | 56.5 | 76.0 | 47.8 | 78.3 |
| chr2  | A730036l17Rik | Intron4       | N | 129059522 | 129060680 | 6  | 55.5 | 80.8 | 45.9 | 75.4 |
| chr19 | Cyb561a3      | Intron4       | N | 10656987  | 10659671  | 12 | 17.9 | 33.6 | 67.0 | 94.9 |
| chr7  | Xylt1         | Intron4       | N | 124735561 | 124737050 | 7  | 78.9 | 94.1 | 57.6 | 85.0 |
| chr5  | Ociad2        | Intron4       | N | 73720560  | 73723342  | 14 | 14.3 | 40.1 | 11.5 | 38.9 |
| chr2  | Rbbp9         | Intron4       | N | 144374883 | 144376415 | 6  | 70.1 | 92.3 | 64.8 | 91.3 |
| chr9  | Dis3l         | Intron4       | N | 64158153  | 64158248  | 1  | 43.9 | 63.2 | 46.7 | 71.4 |
| chr18 | Poli          | Intron4       | N | 70681596  | 70682355  | 4  | 48.0 | 65.1 | 46.9 | 71.4 |
| chr6  | Stra8         | Intron4       | N | 34880968  | 34882997  | 10 | 43.8 | 91.6 | 73.7 | 97.1 |
| chr2  | Slc5a12       | Intron4       | N | 110450350 | 110456830 | 27 | 66.6 | 91.1 | 69.5 | 92.2 |
| chr4  | Skint4        | Intron4       | N | 111792723 | 111797167 | 19 | 40.0 | 71.3 | 31.3 | 53.8 |
| chr2  | A430105l19Rik | Intron4       | N | 118584380 | 118584936 | 3  | 61.2 | 82.8 | 56.7 | 79.1 |
| chr3  | Fam160a1      | Intron4       | N | 85477402  | 85479992  | 13 | 65.2 | 94.2 | 63.6 | 85.4 |
| chr1  | Ccdc19        | Intron4       | N | 174462357 | 174462661 | 1  | 65.7 | 85.7 | 65.8 | 86.5 |



|       |               |          |   |           |           |    |      |       |      |      |
|-------|---------------|----------|---|-----------|-----------|----|------|-------|------|------|
| chr11 | Smtnl2        | Intron4  | N | 72215030  | 72215926  | 4  | 44.1 | 64.3  | 45.8 | 66.3 |
| chr17 | Zdhhc14       | Intron4  | N | 5712526   | 5714968   | 12 | 65.6 | 81.5  | 61.8 | 81.3 |
| chr10 | Arid3a        | Intron4  | N | 79409303  | 79411604  | 12 | 71.9 | 90.4  | 53.8 | 72.9 |
| chr2  | Slc52a3       | Intron4  | N | 151833341 | 151833681 | 2  | 33.3 | 55.3  | 44.8 | 63.9 |
| chr14 | Pdlim2        | Intron4  | N | 70567852  | 70571026  | 16 | 58.1 | 88.1  | 58.7 | 77.7 |
| chr4  | Rcc2          | Intron4  | N | 140266392 | 140268045 | 8  | 69.7 | 88.2  | 71.0 | 90.0 |
| chr10 | Midn          | Intron4  | N | 79614469  | 79616335  | 9  | 7.1  | 52.1  | 6.0  | 24.9 |
| chr6  | Gstk1         | Intron4  | N | 42197584  | 42197732  | 1  | 44.4 | 72.5  | 56.8 | 75.0 |
| chr16 | Mfi2          | Intron4  | N | 31884030  | 31885029  | 3  | 9.8  | 41.2  | 17.0 | 35.1 |
| chr17 | 2310061104Rik | Intron4  | N | 36032318  | 36032615  | 1  | 45.5 | 80.3  | 56.2 | 74.0 |
| chr11 | Spag9         | Intron4  | N | 93904981  | 93909721  | 23 | 37.3 | 62.1  | 44.9 | 62.3 |
| chr6  | Nr2c2         | Intron4  | N | 92099799  | 92102308  | 13 | 73.7 | 88.8  | 72.3 | 89.5 |
| chr12 | Dnajc27       | Intron4  | N | 4096378   | 4097223   | 4  | 70.0 | 86.4  | 72.9 | 90.0 |
| chr15 | Arhgap39      | Intron4  | N | 76557259  | 76557832  | 3  | 61.0 | 79.3  | 48.8 | 65.8 |
| chr11 | Nos2          | Intron4  | N | 78743373  | 78745081  | 9  | 64.3 | 88.0  | 68.4 | 85.4 |
| chr3  | Adam15        | Intron4  | N | 89144860  | 89145429  | 3  | 68.8 | 84.4  | 69.6 | 86.5 |
| chr15 | Smpd5         | Intron4  | N | 76126415  | 76126507  | 2  | 70.8 | 86.1  | 67.3 | 82.8 |
| chr6  | Clec4f        | Intron4  | N | 83603295  | 83604676  | 7  | 60.4 | 77.2  | 80.4 | 95.7 |
| chr11 | Abca9         | Intron37 | N | 110024693 | 110027210 | 13 | 50.0 | 87.9  | 51.8 | 94.3 |
| chr1  | Nbeal1        | Intron35 | N | 60334096  | 60334756  | 3  | 84.6 | 100.0 | 77.7 | 93.0 |
| chr7  | Muc6          | Intron33 | N | 148838209 | 148841146 | 14 | 72.0 | 87.7  | 55.1 | 82.3 |
| chr1  | Kif21b        | Intron33 | N | 138068907 | 138069379 | 2  | 48.6 | 69.9  | 33.9 | 58.3 |
| chr19 | Pcnx13        | Intron33 | N | 5687219   | 5687450   | 1  | 51.4 | 69.7  | 55.8 | 75.9 |
| chr1  | Cps1          | Intron33 | N | 67264501  | 67267076  | 13 | 61.9 | 79.0  | 56.3 | 75.0 |
| chr6  | Itpr2         | Intron32 | N | 146293753 | 146295589 | 9  | 25.0 | 45.7  | 42.6 | 75.8 |
| chr1  | Kif21b        | Intron32 | N | 138068283 | 138068735 | 2  | 55.7 | 74.3  | 51.2 | 66.5 |
| chr17 | Dnah8         | Intron31 | N | 30849332  | 30849978  | 3  | 45.4 | 62.8  | 46.0 | 66.5 |
| chr13 | Dip2c         | Intron30 | N | 9634137   | 9636340   | 11 | 76.9 | 96.8  | 70.2 | 85.2 |
| chr4  | Grhl3         | Intron3  | N | 135104414 | 135105153 | 4  | 28.1 | 51.4  | 21.2 | 62.4 |
| chr5  | Upk3b         | Intron3  | N | 136516110 | 136517631 | 8  | 66.6 | 88.0  | 47.3 | 88.3 |
| chr1  | Mettl21c      | Intron3  | N | 44070619  | 44074030  | 17 | 34.1 | 52.5  | 15.8 | 53.7 |
| chr6  | Atp6v0e2      | Intron3  | N | 48490166  | 48490426  | 2  | 52.5 | 67.7  | 38.5 | 74.3 |
| chr5  | Gm3716        | Intron3  | N | 65001395  | 65001751  | 2  | 14.9 | 48.7  | 13.9 | 47.4 |
| chr2  | Cacnb4        | Intron3  | N | 52305566  | 52307388  | 9  | 43.0 | 64.6  | 55.2 | 87.5 |
| chr7  | Svip          | Intron3  | N | 59259356  | 59261107  | 7  | 40.8 | 70.3  | 50.9 | 80.8 |
| chr17 | Mllt4         | Intron3  | N | 13944400  | 13945938  | 8  | 21.2 | 75.4  | 65.9 | 95.5 |
| chr9  | Limd1         | Intron3  | N | 123419694 | 123420333 | 3  | 22.6 | 51.6  | 24.8 | 54.2 |
| chr13 | Phactr1       | Intron3  | N | 43228430  | 43229295  | 4  | 49.2 | 80.1  | 53.7 | 81.4 |
| chr2  | Slc20a1       | Intron3  | N | 129026060 | 129026235 | 1  | 66.1 | 81.5  | 46.2 | 72.9 |
| chr9  | Keap1         | Intron3  | N | 21036347  | 21037831  | 5  | 48.9 | 67.3  | 48.6 | 75.2 |
| chr11 | Trim65        | Intron3  | N | 115988930 | 115989011 | 1  | 43.9 | 63.3  | 33.9 | 60.2 |
| chr19 | Scd2          | Intron3  | N | 44372661  | 44374098  | 7  | 30.7 | 50.1  | 19.8 | 45.0 |
| chr1  | Igfn1         | Intron3  | N | 137852435 | 137853274 | 4  | 74.6 | 89.7  | 52.6 | 77.6 |
| chr18 | Spink3        | Intron3  | N | 43894889  | 43896748  | 8  | 23.8 | 56.0  | 8.9  | 33.4 |
| chr2  | 4932418E24Rik | Intron3  | N | 26131788  | 26131936  | 1  | 46.5 | 76.0  | 51.1 | 75.0 |
| chr5  | Pdgfra        | Intron3  | N | 75559878  | 75562535  | 13 | 70.4 | 89.5  | 72.1 | 95.4 |
| chr17 | Lta           | Intron3  | N | 35341608  | 35342103  | 3  | 35.6 | 64.2  | 34.6 | 57.7 |
| chr13 | Elmo1         | Intron3  | N | 20300044  | 20301007  | 5  | 64.0 | 96.8  | 62.6 | 84.8 |
| chr19 | Snx15         | Intron3  | N | 6121523   | 6121782   | 1  | 12.5 | 44.2  | 18.1 | 39.2 |

|       |               |          |   |           |           |     |      |       |      |       |
|-------|---------------|----------|---|-----------|-----------|-----|------|-------|------|-------|
| chr8  | Gas8          | Intron3  | N | 126047036 | 126047977 | 5   | 56.5 | 87.2  | 71.5 | 92.6  |
| chr9  | Trim71        | Intron3  | N | 114434240 | 114471422 | 180 | 37.1 | 67.4  | 44.2 | 64.7  |
| chr7  | Arnt2         | Intron3  | N | 91411054  | 91411688  | 3   | 31.8 | 76.9  | 79.6 | 100.0 |
| chr18 | Svil          | Intron3  | N | 5049493   | 5054015   | 23  | 65.3 | 81.6  | 67.0 | 87.0  |
| chr5  | Khk           | Intron3  | N | 31229530  | 31230815  | 6   | 70.0 | 100.0 | 77.0 | 96.4  |
| chr6  | Gstk1         | Intron3  | N | 42196939  | 42197482  | 3   | 45.4 | 65.1  | 45.3 | 64.3  |
| chr11 | Wipf2         | Intron3  | N | 98752147  | 98752809  | 3   | 64.8 | 84.1  | 67.7 | 86.5  |
| chr17 | Soga2         | Intron3  | N | 66695726  | 66697582  | 9   | 61.6 | 78.7  | 61.1 | 79.6  |
| chr11 | Havcr1        | Intron3  | N | 46566145  | 46569630  | 17  | 59.5 | 74.9  | 74.5 | 93.0  |
| chr1  | Serpinb5      | Intron3  | N | 108768965 | 108771619 | 13  | 73.2 | 90.7  | 74.6 | 92.9  |
| chr14 | Bcl2l2        | Intron3  | N | 55503651  | 55504220  | 3   | 61.3 | 77.8  | 63.2 | 81.3  |
| chr2  | Yme1l1        | Intron3  | N | 23018184  | 23020018  | 9   | 58.1 | 77.7  | 64.6 | 82.6  |
| chr9  | Icam1         | Intron3  | N | 20830303  | 20830755  | 2   | 69.2 | 84.6  | 62.1 | 79.6  |
| chr11 | Abcc3         | Intron3  | N | 94212417  | 94213112  | 3   | 65.7 | 91.3  | 46.7 | 63.7  |
| chr15 | Fbxo43        | Intron3  | N | 36087793  | 36091441  | 18  | 56.7 | 78.8  | 55.9 | 72.9  |
| chr8  | Msr1          | Intron3  | N | 40693493  | 40696985  | 17  | 45.4 | 62.3  | 45.9 | 62.7  |
| chr2  | Fam171b       | Intron3  | N | 83695687  | 83698374  | 13  | 56.8 | 83.1  | 80.4 | 96.8  |
| chr10 | Gm20125       | Intron3  | N | 16675852  | 16679253  | 14  | 76.7 | 93.3  | 83.6 | 100.0 |
| chr4  | Agtrap        | Intron3  | N | 147456486 | 147458067 | 8   | 43.1 | 64.7  | 44.3 | 60.1  |
| chr11 | Shroom1       | Intron3  | N | 53277833  | 53278621  | 4   | 62.4 | 89.4  | 74.3 | 90.1  |
| chr10 | Vmn2r84       | Intron3  | N | 129826403 | 129827730 | 6   | 50.0 | 69.6  | 54.1 | 69.2  |
| chr2  | Capn3         | Intron3  | N | 120307965 | 120310226 | 11  | 27.2 | 64.6  | 11.1 | 26.2  |
| chr10 | Sbno2         | Intron29 | N | 79545472  | 79546985  | 8   | 5.1  | 57.6  | 17.9 | 51.3  |
| chr1  | Kif21b        | Intron29 | N | 138065901 | 138066565 | 3   | 51.9 | 74.5  | 51.5 | 73.7  |
| chr2  | Sec16a        | Intron29 | N | 26297591  | 26300594  | 13  | 31.4 | 51.6  | 39.5 | 55.0  |
| chr12 | Kidins220     | Intron28 | N | 25732792  | 25735959  | 16  | 2.8  | 48.0  | 5.1  | 30.4  |
| chr10 | Lrp1          | Intron28 | N | 126989366 | 126989766 | 2   | 84.6 | 100.0 | 70.5 | 87.2  |
| chr9  | Col6a6        | Intron27 | N | 105665244 | 105669353 | 21  | 54.9 | 70.4  | 61.5 | 96.1  |
| chr7  | Abcc6         | Intron27 | N | 53274061  | 53275507  | 7   | 63.6 | 93.3  | 58.1 | 75.5  |
| chr15 | Rgs22         | Intron27 | N | 36069663  | 36070082  | 1   | 26.5 | 42.4  | 30.8 | 46.4  |
| chr15 | Lrrk2         | Intron26 | N | 91572776  | 91576128  | 17  | 67.5 | 100.0 | 71.6 | 100.0 |
| chr1  | Aox3          | Intron26 | N | 58229193  | 58233317  | 20  | 32.4 | 72.7  | 35.4 | 61.1  |
| chr9  | Sorl1         | Intron26 | N | 41830533  | 41832378  | 9   | 47.5 | 64.4  | 48.7 | 68.2  |
| chr2  | Cep152        | Intron26 | N | 125446127 | 125446908 | 4   | 44.3 | 71.7  | 52.8 | 71.3  |
| chr4  | Arhgef10l     | Intron25 | N | 140166480 | 140167141 | 3   | 59.3 | 79.5  | 56.1 | 77.5  |
| chr2  | Osbp16        | Intron25 | N | 76431524  | 76432820  | 6   | 59.7 | 76.8  | 57.7 | 73.9  |
| chr1  | Cspp1         | Intron25 | N | 10117645  | 10120066  | 12  | 77.5 | 96.5  | 79.6 | 94.9  |
| chr2  | Duox2         | Intron24 | N | 122120416 | 122120820 | 2   | 57.5 | 83.8  | 23.8 | 83.0  |
| chr5  | Ube3b         | Intron24 | N | 114862919 | 114865210 | 11  | 56.0 | 76.1  | 57.9 | 77.1  |
| chr2  | Duox2         | Intron23 | N | 122119830 | 122120324 | 2   | 69.0 | 89.4  | 54.7 | 88.4  |
| chr11 | Itgb4         | Intron23 | N | 115853224 | 115854368 | 5   | 45.4 | 66.8  | 47.6 | 70.0  |
| chr13 | Mtr           | Intron23 | N | 12330316  | 12331915  | 6   | 68.8 | 90.8  | 72.5 | 93.5  |
| chr7  | Tjp1          | Intron23 | N | 72482033  | 72485035  | 15  | 49.7 | 97.4  | 72.6 | 91.9  |
| chr5  | Ube3b         | Intron23 | N | 114862497 | 114862859 | 2   | 63.7 | 82.0  | 65.8 | 84.1  |
| chr2  | Atp9a         | Intron23 | N | 168514851 | 168516465 | 8   | 58.1 | 77.2  | 56.0 | 72.8  |
| chr9  | Als2cl        | Intron22 | N | 110798390 | 110799140 | 4   | 44.7 | 64.5  | 47.9 | 68.3  |
| chr17 | Abca3         | Intron22 | N | 24535554  | 24536829  | 6   | 47.8 | 77.5  | 66.2 | 84.4  |
| chr9  | 5830418K08Rik | Intron22 | N | 15151481  | 15155254  | 19  | 67.9 | 89.5  | 69.4 | 86.4  |
| chr7  | Muc5ac        | Intron21 | N | 148986222 | 148986848 | 3   | 45.0 | 61.6  | 61.1 | 90.3  |

|       |               |          |   |           |           |    |      |       |      |       |
|-------|---------------|----------|---|-----------|-----------|----|------|-------|------|-------|
| chr5  | Ncor2         | Intron21 | N | 125517289 | 125517643 | 3  | 80.6 | 95.8  | 71.9 | 100.0 |
| chr7  | Trpm5         | Intron21 | N | 150272948 | 150273605 | 3  | 52.8 | 80.9  | 45.6 | 66.6  |
| chr1  | Sec16b        | Intron21 | N | 159491108 | 159491646 | 3  | 31.1 | 46.6  | 38.0 | 58.7  |
| chr10 | Myo1a         | Intron21 | N | 127153419 | 127155567 | 11 | 67.8 | 85.8  | 61.3 | 81.5  |
| chr11 | Atp2a3        | Intron21 | N | 72803050  | 72805190  | 12 | 58.8 | 79.2  | 69.3 | 89.4  |
| chr9  | Slc44a2       | Intron21 | N | 21156996  | 21158125  | 6  | 58.8 | 77.8  | 59.3 | 75.5  |
| chr7  | Abcc6         | Intron21 | N | 53264249  | 53267863  | 18 | 52.8 | 73.8  | 61.4 | 77.5  |
| chr1  | Ankrd44       | Intron21 | N | 54819318  | 54820488  | 6  | 67.6 | 89.8  | 62.6 | 78.3  |
| chr11 | Nf1           | Intron20 | N | 79255477  | 79257270  | 9  | 35.6 | 65.4  | 35.7 | 90.7  |
| chr5  | Plb1          | Intron20 | N | 32605083  | 32605679  | 3  | 12.9 | 56.2  | 15.5 | 46.2  |
| chr1  | Sec16b        | Intron20 | N | 159489653 | 159490813 | 6  | 56.6 | 86.9  | 46.1 | 73.6  |
| chr16 | Slc15a2       | Intron20 | N | 36781794  | 36782357  | 3  | 57.7 | 84.1  | 56.7 | 83.1  |
| chr11 | Abcc3         | Intron20 | N | 94226544  | 94228903  | 12 | 6.3  | 35.4  | 36.6 | 60.6  |
| chr7  | Tjp1          | Intron20 | N | 72474652  | 72480917  | 31 | 80.8 | 96.5  | 72.8 | 93.5  |
| chr1  | Pik3c2b       | Intron20 | N | 134988246 | 134988848 | 3  | 44.0 | 67.0  | 53.8 | 72.8  |
| chr8  | Lsm1          | Intron2  | N | 26902698  | 26904148  | 7  | 49.5 | 92.0  | 31.6 | 100.0 |
| chr11 | Slc13a2       | Intron2  | N | 78211931  | 78212533  | 3  | 41.7 | 92.4  | 32.6 | 95.0  |
| chr2  | Duoxa2        | Intron2  | N | 122125942 | 122126300 | 2  | 21.1 | 81.2  | 24.1 | 70.9  |
| chr7  | 2310010J17Rik | Intron2  | N | 97275555  | 97278381  | 14 | 1.3  | 23.7  | 47.2 | 90.0  |
| chr5  | Zfp513        | Intron2  | N | 31503196  | 31503955  | 4  | 45.1 | 71.7  | 47.6 | 90.3  |
| chr14 | Timm23        | Intron2  | N | 33002441  | 33004527  | 10 | 0.0  | 92.7  | 46.0 | 86.6  |
| chr2  | Gpsm1         | Intron2  | N | 26178156  | 26179027  | 4  | 58.8 | 95.7  | 55.7 | 95.9  |
| chr11 | Dnah2         | Intron2  | N | 69234923  | 69235063  | 1  | 38.0 | 60.7  | 31.2 | 67.3  |
| chr9  | Gm5627        | Intron2  | N | 102649949 | 102651625 | 8  | 40.0 | 60.9  | 22.1 | 58.1  |
| chr5  | Brap          | Intron2  | N | 122112171 | 122113304 | 6  | 54.5 | 93.8  | 52.8 | 88.8  |
| chr6  | Vgll4         | Intron2  | N | 114812898 | 114813901 | 5  | 62.5 | 86.7  | 47.4 | 81.3  |
| chr11 | Clec10a       | Intron2  | N | 69981507  | 69982084  | 3  | 42.4 | 76.3  | 43.8 | 76.4  |
| chr19 | Ifit2         | Intron2  | N | 34644861  | 34647556  | 12 | 54.7 | 81.7  | 49.9 | 82.2  |
| chr6  | Crebl2        | Intron2  | N | 134799319 | 134801097 | 9  | 50.1 | 82.4  | 63.1 | 95.4  |
| chr4  | Rcc2          | Intron2  | N | 140258351 | 140263865 | 22 | 48.9 | 79.9  | 50.7 | 82.2  |
| chr2  | Pex16         | Intron2  | N | 92216064  | 92216783  | 3  | 1.7  | 41.5  | 45.3 | 76.4  |
| chr7  | Mrpl23        | Intron2  | N | 149721033 | 149721974 | 5  | 50.0 | 71.3  | 40.0 | 70.8  |
| chr18 | Pmaip1        | Intron2  | N | 66620653  | 66622923  | 10 | 66.3 | 95.2  | 67.1 | 97.5  |
| chr2  | Slc20a1       | Intron2  | N | 129025801 | 129025918 | 1  | 79.0 | 94.7  | 64.6 | 94.8  |
| chr17 | Bag6          | Intron2  | N | 35273181  | 35275316  | 10 | 48.8 | 86.0  | 58.6 | 88.6  |
| chr11 | Tm4sf5        | Intron2  | N | 70323377  | 70323716  | 2  | 22.5 | 53.2  | 17.0 | 46.7  |
| chr2  | Fastkd5       | Intron2  | N | 130454372 | 130455651 | 5  | 0.0  | 34.0  | 48.1 | 77.0  |
| chr14 | Slc39a2       | Intron2  | N | 52513895  | 52514130  | 1  | 44.4 | 77.1  | 41.6 | 69.1  |
| chr8  | Zdhhc2        | Intron2  | N | 41531159  | 41532404  | 6  | 25.0 | 56.7  | 34.1 | 61.4  |
| chr18 | Pdgfrb        | Intron2  | N | 61219844  | 61220858  | 5  | 72.5 | 91.8  | 66.1 | 92.9  |
| chr17 | Ccnd3         | Intron2  | N | 47731899  | 47734368  | 12 | 21.8 | 50.5  | 19.7 | 46.1  |
| chr3  | Spry1         | Intron2  | N | 37539731  | 37541476  | 5  | 13.7 | 34.5  | 16.5 | 42.6  |
| chr3  | Gm11548       | Intron2  | N | 36401217  | 36403213  | 10 | 74.3 | 100.0 | 74.2 | 100.0 |
| chr14 | Fam107a       | Intron2  | N | 9132181   | 9133572   | 7  | 65.8 | 84.0  | 42.4 | 68.1  |
| chr2  | Wfdc3         | Intron2  | N | 164557694 | 164559679 | 10 | 32.8 | 48.0  | 30.8 | 56.4  |
| chr17 | Cldn6         | Intron2  | N | 23816789  | 23818014  | 5  | 53.2 | 80.0  | 55.0 | 79.8  |
| chr6  | Ii17ra        | Intron2  | N | 120422135 | 120422943 | 4  | 56.4 | 85.2  | 59.6 | 83.7  |
| chr5  | Speer7-ps1    | Intron2  | N | 15205067  | 15211265  | 29 | 35.8 | 63.8  | 38.3 | 62.4  |
| chr5  | AI839979      | Intron2  | N | 31873293  | 31873556  | 1  | 26.3 | 41.5  | 26.9 | 50.7  |

|       |               |          |   |           |           |    |      |       |      |       |
|-------|---------------|----------|---|-----------|-----------|----|------|-------|------|-------|
| chr5  | Mnx1          | Intron2  | N | 29801457  | 29804124  | 11 | 28.7 | 45.6  | 24.5 | 48.0  |
| chr7  | Lrrc28        | Intron2  | N | 74674632  | 74676500  | 9  | 54.4 | 72.2  | 50.0 | 73.3  |
| chr11 | Patz1         | Intron2  | N | 3193347   | 3194458   | 6  | 53.8 | 73.7  | 61.4 | 84.7  |
| chr2  | Btbd3         | Intron2  | N | 138104994 | 138105484 | 2  | 55.7 | 79.2  | 46.7 | 69.6  |
| chr15 | Gm16576       | Intron2  | N | 79573661  | 79574942  | 7  | 37.8 | 66.6  | 69.7 | 92.5  |
| chr10 | Gcc2          | Intron2  | N | 57718631  | 57719567  | 4  | 0.0  | 38.9  | 0.0  | 22.6  |
| chr5  | Rasl11b       | Intron2  | N | 74592185  | 74593291  | 6  | 36.8 | 56.1  | 25.3 | 47.3  |
| chr1  | Dars2         | Intron2  | N | 162973820 | 162975089 | 6  | 46.2 | 89.1  | 71.6 | 93.1  |
| chr12 | Ifi27l2b      | Intron2  | N | 104690178 | 104690680 | 3  | 59.1 | 76.0  | 67.7 | 88.5  |
| chr14 | Ajuba         | Intron2  | N | 55188382  | 55189081  | 4  | 60.6 | 81.4  | 62.3 | 82.9  |
| chr7  | Knop1         | Intron2  | N | 125992089 | 125994134 | 10 | 35.5 | 68.7  | 33.6 | 54.2  |
| chr16 | Hira          | Intron2  | N | 18894930  | 18896546  | 8  | 33.3 | 53.8  | 73.4 | 93.9  |
| chr12 | Tmem179       | Intron2  | N | 113741532 | 113742744 | 6  | 53.3 | 68.7  | 62.5 | 82.9  |
| chr14 | Oxa1l         | Intron2  | N | 54981153  | 54982965  | 8  | 67.5 | 85.8  | 70.4 | 90.8  |
| chr15 | Xrcc6         | Intron2  | N | 81847629  | 81849410  | 9  | 80.3 | 98.2  | 77.2 | 97.4  |
| chr11 | Pdk2          | Intron2  | N | 94889293  | 94889792  | 3  | 53.8 | 71.4  | 49.0 | 68.9  |
| chr17 | Capn11        | Intron2  | N | 45767734  | 45768736  | 5  | 14.0 | 45.2  | 32.7 | 52.5  |
| chr4  | Grhpr         | Intron2  | N | 44995882  | 44996745  | 4  | 41.5 | 59.3  | 37.6 | 56.6  |
| chr3  | Abca4         | Intron2  | N | 121755914 | 121757109 | 6  | 57.0 | 80.5  | 53.9 | 72.8  |
| chr1  | BC055402      | Intron2  | N | 57261453  | 57263557  | 11 | 25.4 | 66.3  | 40.8 | 59.7  |
| chr10 | Wispl3        | Intron2  | N | 38873148  | 38874742  | 8  | 71.5 | 92.0  | 66.1 | 84.9  |
| chr12 | Fos           | Intron2  | N | 86816137  | 86816541  | 1  | 52.6 | 70.1  | 45.8 | 64.5  |
| chr8  | Psmbl10       | Intron2  | N | 108460048 | 108460595 | 3  | 10.0 | 34.7  | 13.3 | 31.7  |
| chr16 | Zfp597        | Intron2  | N | 3871277   | 3872058   | 3  | 40.9 | 65.4  | 42.9 | 61.3  |
| chr1  | Zfp451        | Intron2  | N | 33822755  | 33826565  | 18 | 23.5 | 65.3  | 43.3 | 61.4  |
| chr11 | Ehbp1         | Intron2  | N | 21907201  | 21913486  | 28 | 33.0 | 57.3  | 37.2 | 55.1  |
| chr7  | Csrp3         | Intron2  | N | 56088026  | 56089108  | 5  | 72.9 | 96.7  | 65.3 | 83.1  |
| chr5  | Fbxo21        | Intron2  | N | 118428003 | 118429749 | 7  | 43.9 | 69.2  | 49.8 | 67.3  |
| chr7  | Rras          | Intron2  | N | 52275558  | 52275672  | 1  | 36.0 | 57.1  | 42.5 | 60.0  |
| chr5  | Plod3         | Intron2  | N | 137464079 | 137464204 | 1  | 38.2 | 63.2  | 44.0 | 61.4  |
| chr11 | Wnk4          | Intron2  | N | 101124210 | 101125082 | 3  | 31.1 | 50.2  | 28.0 | 45.1  |
| chr1  | Ercc5         | Intron2  | N | 44213958  | 44214988  | 5  | 63.4 | 95.3  | 71.1 | 88.0  |
| chr9  | Snx22         | Intron2  | N | 65915388  | 65915586  | 2  | 47.6 | 65.8  | 43.6 | 59.8  |
| chr14 | Fbxl3         | Intron2  | N | 103488691 | 103491520 | 14 | 67.6 | 83.1  | 70.3 | 86.3  |
| chr1  | Ppp1r12b      | Intron2  | N | 136668626 | 136670002 | 7  | 21.3 | 67.1  | 26.1 | 41.8  |
| chr19 | 5830416P10Rik | Intron2  | N | 53519835  | 53520830  | 5  | 28.8 | 66.3  | 30.3 | 46.0  |
| chr11 | Arrb2         | Intron2  | N | 70249075  | 70249664  | 3  | 57.5 | 82.5  | 67.1 | 82.8  |
| chr12 | Serpina1b     | Intron2  | N | 104967592 | 104968459 | 4  | 38.1 | 81.8  | 75.2 | 90.7  |
| chr4  | Cldn19        | Intron2  | N | 118929656 | 118929756 | 1  | 56.1 | 78.0  | 72.1 | 87.5  |
| chr9  | Nlr1          | Intron2  | N | 44062327  | 44063513  | 6  | 58.3 | 75.0  | 55.0 | 70.4  |
| chr16 | Ccdc14        | Intron2  | N | 34695730  | 34696898  | 6  | 0.0  | 29.3  | 9.3  | 24.7  |
| chr5  | Shh           | Intron2  | N | 28788124  | 28793000  | 11 | 28.4 | 57.7  | 34.6 | 49.9  |
| chr8  | Zfp423        | Intron2  | N | 90210444  | 90211854  | 7  | 19.2 | 83.6  | 67.4 | 82.7  |
| chr18 | Slc4a9        | Intron2  | N | 36688458  | 36688869  | 2  | 75.0 | 94.3  | 74.6 | 89.7  |
| chr4  | Slc25a33      | Intron2  | N | 149123439 | 149126512 | 15 | 67.1 | 92.1  | 74.8 | 89.8  |
| chr11 | Brip1         | Intron19 | N | 86012497  | 86014610  | 9  | 61.9 | 100.0 | 50.0 | 100.0 |
| chr2  | Pkp4          | Intron19 | N | 59186099  | 59188550  | 12 | 56.6 | 82.0  | 54.8 | 83.6  |
| chr19 | Myof          | Intron19 | N | 38009412  | 38010336  | 5  | 52.9 | 76.0  | 58.0 | 80.4  |
| chr1  | Ptprc         | Intron19 | N | 139990880 | 139996059 | 21 | 70.0 | 85.5  | 65.2 | 85.6  |

|       |               |          |   |           |           |    |      |       |      |      |
|-------|---------------|----------|---|-----------|-----------|----|------|-------|------|------|
| chr1  | Igsf9         | Intron19 | N | 174427878 | 174428127 | 1  | 74.3 | 94.9  | 76.1 | 91.9 |
| chr7  | Mical2        | Intron18 | N | 119490423 | 119492907 | 12 | 64.0 | 88.8  | 68.8 | 96.6 |
| chr8  | Gpr124        | Intron18 | N | 28231009  | 28231237  | 1  | 50.0 | 73.0  | 44.0 | 71.0 |
| chr2  | Madd          | Intron18 | N | 91003071  | 91003655  | 3  | 34.1 | 55.4  | 38.2 | 64.9 |
| chr8  | Nek5          | Intron18 | N | 23231341  | 23234015  | 13 | 64.4 | 96.5  | 74.1 | 92.1 |
| chr10 | Ankrd24       | Intron18 | N | 81109179  | 81109537  | 2  | 56.1 | 72.9  | 58.3 | 75.2 |
| chr17 | Thada         | Intron18 | N | 84822530  | 84825478  | 14 | 42.6 | 80.4  | 60.6 | 77.2 |
| chr2  | Prpf6         | Intron17 | N | 181384936 | 181385790 | 4  | 12.7 | 66.7  | 14.5 | 46.3 |
| chr9  | Stt3a         | Intron17 | N | 36572766  | 36575134  | 9  | 45.7 | 61.4  | 61.6 | 84.8 |
| chr16 | Dlg1          | Intron17 | N | 31838313  | 31842855  | 23 | 66.7 | 91.5  | 72.5 | 92.2 |
| chr17 | C3            | Intron17 | N | 57354613  | 57355151  | 3  | 55.7 | 71.4  | 54.0 | 71.9 |
| chr1  | Epha4         | Intron17 | N | 77508326  | 77511515  | 8  | 16.1 | 52.9  | 58.7 | 76.1 |
| chr18 | Aldh7a1       | Intron17 | N | 56720484  | 56721686  | 6  | 43.3 | 71.8  | 55.1 | 72.3 |
| chr9  | Xylb          | Intron17 | N | 119297887 | 119299547 | 8  | 53.5 | 74.2  | 49.8 | 64.9 |
| chr8  | Glg1          | Intron16 | N | 113702887 | 113704834 | 10 | 31.9 | 86.0  | 52.0 | 95.6 |
| chr5  | 9330182L06Rik | Intron16 | N | 9445554   | 9446893   | 7  | 46.9 | 65.6  | 49.6 | 77.0 |
| chr9  | Sema3b        | Intron16 | N | 107506532 | 107507299 | 4  | 40.1 | 61.1  | 38.3 | 65.3 |
| chr14 | Cdhr1         | Intron16 | N | 37910544  | 37911274  | 3  | 41.3 | 67.9  | 52.6 | 75.3 |
| chr6  | Ccdc37        | Intron16 | N | 90377538  | 90378372  | 4  | 8.3  | 37.9  | 27.1 | 47.2 |
| chr6  | Srgap3        | Intron16 | N | 112725715 | 112727013 | 6  | 45.5 | 96.3  | 73.9 | 92.0 |
| chr14 | Ndrg2         | Intron15 | N | 52531222  | 52532997  | 6  | 30.6 | 53.3  | 37.2 | 65.0 |
| chr9  | Nek11         | Intron15 | N | 105295491 | 105297525 | 10 | 9.8  | 50.3  | 29.2 | 55.4 |
| chr1  | Sgk3          | Intron15 | N | 9876224   | 9878950   | 14 | 29.4 | 96.2  | 40.6 | 63.3 |
| chr6  | Cftr          | Intron15 | N | 18220327  | 18223698  | 16 | 45.7 | 63.4  | 50.8 | 69.9 |
| chr11 | Camta2        | Intron15 | N | 70495271  | 70495962  | 3  | 39.4 | 71.4  | 44.1 | 62.4 |
| chr14 | Piwil2        | Intron15 | N | 70809193  | 70810188  | 5  | 33.3 | 83.3  | 70.2 | 86.1 |
| chr1  | Glb1l         | Intron14 | N | 75205413  | 75205630  | 1  | 15.9 | 37.8  | 15.6 | 42.0 |
| chr14 | Ero1l         | Intron14 | N | 45925008  | 45926186  | 6  | 52.2 | 76.5  | 54.7 | 76.4 |
| chr10 | Itga7         | Intron14 | N | 128383459 | 128383854 | 2  | 31.1 | 73.9  | 61.4 | 80.4 |
| chr1  | Npas2         | Intron14 | N | 39391658  | 39392839  | 6  | 16.1 | 79.8  | 62.2 | 80.6 |
| chr5  | Pan3          | Intron14 | N | 148348117 | 148350818 | 14 | 60.9 | 86.9  | 71.2 | 89.3 |
| chr10 | Rfx6          | Intron14 | N | 51441425  | 51442806  | 7  | 12.6 | 48.6  | 9.8  | 25.2 |
| chr11 | Rpa1          | Intron14 | N | 75153278  | 75153791  | 3  | 71.5 | 93.4  | 78.9 | 94.1 |
| chr11 | Vps54         | Intron14 | N | 21206551  | 21206911  | 2  | 30.0 | 61.9  | 37.0 | 52.1 |
| chr13 | Phactr1       | Intron13 | N | 43228430  | 43229295  | 4  | 49.2 | 80.1  | 53.7 | 81.4 |
| chr10 | Dctn2         | Intron13 | N | 126715279 | 126715372 | 1  | 69.6 | 95.5  | 65.0 | 88.6 |
| chr5  | Gpr133        | Intron13 | N | 129648411 | 129649841 | 7  | 52.6 | 74.0  | 54.6 | 77.1 |
| chr2  | Lpin3         | Intron13 | N | 160727613 | 160728298 | 3  | 63.8 | 100.0 | 66.2 | 88.6 |
| chr11 | Zmynd15       | Intron13 | N | 70279002  | 70279416  | 1  | 46.6 | 62.4  | 42.1 | 64.2 |
| chr14 | Bmp1          | Intron13 | N | 70904605  | 70905138  | 3  | 53.9 | 95.4  | 63.9 | 84.9 |
| chr13 | Tert          | Intron13 | N | 73784287  | 73785394  | 6  | 70.8 | 94.9  | 76.8 | 96.3 |
| chr11 | Mybbp1a       | Intron13 | N | 72259760  | 72260473  | 4  | 73.9 | 91.2  | 79.2 | 98.4 |
| chr7  | Mvp           | Intron13 | N | 134145190 | 134145322 | 1  | 65.6 | 82.0  | 76.5 | 94.9 |
| chr9  | Kirrel3       | Intron13 | N | 34832732  | 34835916  | 16 | 67.5 | 90.5  | 63.7 | 81.7 |
| chr17 | Tiam2         | Intron13 | N | 3453413   | 3454087   | 3  | 56.1 | 91.4  | 76.8 | 94.5 |
| chr3  | Dclk2         | Intron13 | N | 86634794  | 86635654  | 4  | 66.6 | 83.8  | 72.4 | 89.3 |
| chr15 | D15Ertdd621e  | Intron13 | N | 58264183  | 58264448  | 1  | 42.3 | 74.3  | 39.7 | 56.6 |
| chr13 | Ssbp2         | Intron13 | N | 91828472  | 91830464  | 10 | 48.5 | 76.4  | 51.5 | 66.8 |
| chr18 | Dsg4          | Intron12 | N | 20621185  | 20623317  | 11 | 23.5 | 49.5  | 23.4 | 95.2 |

|       |               |          |   |           |           |    |      |       |      |      |
|-------|---------------|----------|---|-----------|-----------|----|------|-------|------|------|
| chr4  | Ift74         | Intron12 | N | 94327680  | 94329277  | 7  | 5.1  | 44.3  | 11.1 | 68.6 |
| chr8  | Tacc1         | Intron12 | N | 26310679  | 26311593  | 1  | 45.4 | 66.9  | 42.5 | 75.1 |
| chr4  | Wdr65         | Intron12 | N | 118261743 | 118265602 | 19 | 54.5 | 86.7  | 62.6 | 90.1 |
| chr11 | Slc38a10      | Intron12 | N | 119999296 | 120000299 | 5  | 72.5 | 92.5  | 56.1 | 80.6 |
| chr1  | Pign          | Intron12 | N | 107484649 | 107485625 | 5  | 48.6 | 72.1  | 67.1 | 90.4 |
| chr3  | Chd1l         | Intron12 | N | 97391145  | 97392162  | 5  | 73.6 | 91.0  | 56.9 | 79.9 |
| chr8  | Galns         | Intron12 | N | 125128114 | 125129039 | 5  | 66.4 | 88.4  | 67.6 | 90.5 |
| chr12 | Exoc3l4       | Intron12 | N | 112667748 | 112668879 | 2  | 17.7 | 44.0  | 20.2 | 42.8 |
| chr6  | Slc6a11       | Intron12 | N | 114194905 | 114195599 | 3  | 51.0 | 73.4  | 57.3 | 79.0 |
| chr9  | Snx1          | Intron12 | N | 65952744  | 65953327  | 3  | 21.8 | 45.2  | 28.3 | 49.5 |
| chr9  | Vipr1         | Intron12 | N | 121577919 | 121578491 | 2  | 15.4 | 61.2  | 25.1 | 46.2 |
| chr3  | D930015E06Rik | Intron12 | N | 83727020  | 83727909  | 4  | 66.4 | 84.2  | 68.3 | 89.3 |
| chr11 | B3gntl1       | Intron12 | N | 121532488 | 121534298 | 7  | 76.2 | 96.8  | 66.1 | 86.0 |
| chr14 | Hacl1         | Intron12 | N | 32444225  | 32446081  | 9  | 72.2 | 100.0 | 55.1 | 74.5 |
| chr10 | Tjp3          | Intron12 | N | 80742317  | 80742638  | 2  | 37.4 | 65.8  | 48.9 | 67.7 |
| chr17 | Foxp4         | Intron12 | N | 48015704  | 48017211  | 5  | 36.7 | 63.8  | 42.3 | 60.6 |
| chr2  | Ttc17         | Intron12 | N | 94202935  | 94204422  | 6  | 79.3 | 96.8  | 79.8 | 97.5 |
| chr4  | Rad54b        | Intron12 | N | 11537713  | 11539518  | 9  | 62.9 | 81.3  | 70.8 | 87.9 |
| chr2  | Slc9a8        | Intron12 | N | 167293268 | 167294463 | 6  | 69.6 | 94.4  | 73.1 | 89.6 |
| chr11 | Itgb4         | Intron12 | N | 115846413 | 115847930 | 8  | 71.3 | 89.3  | 71.0 | 87.3 |
| chr11 | Grb10         | Intron12 | N | 11851663  | 11854746  | 15 | 43.2 | 63.0  | 54.2 | 69.9 |
| chr11 | Alox15        | Intron12 | N | 70163909  | 70164215  | 2  | 51.7 | 69.2  | 56.3 | 71.9 |
| chr4  | Rap1gap       | Intron11 | N | 137273710 | 137273829 | 1  | 62.0 | 86.2  | 49.7 | 78.4 |
| chr4  | Plk3          | Intron11 | N | 116805420 | 116805509 | 1  | 61.6 | 89.3  | 61.6 | 89.7 |
| chr4  | Casz1         | Intron11 | N | 148313432 | 148315390 | 8  | 69.4 | 90.1  | 60.7 | 86.5 |
| chr6  | Dysf          | Intron11 | N | 84020198  | 84020872  | 3  | 43.2 | 64.2  | 47.3 | 72.7 |
| chr4  | Rps6ka1       | Intron11 | N | 133419986 | 133420939 | 5  | 40.0 | 70.4  | 47.9 | 72.4 |
| chr2  | Src           | Intron11 | N | 157293347 | 157294218 | 4  | 40.0 | 68.5  | 68.7 | 90.5 |
| chr7  | Anpep         | Intron11 | N | 86981293  | 86983127  | 9  | 41.3 | 82.5  | 71.8 | 92.2 |
| chr7  | Far1          | Intron11 | N | 120705020 | 120709898 | 23 | 57.2 | 73.4  | 57.1 | 77.3 |
| chr14 | Cdh24         | Intron11 | N | 55258499  | 55260057  | 6  | 53.6 | 78.0  | 53.4 | 72.8 |
| chr12 | Scin          | Intron11 | N | 40808362  | 40810871  | 13 | 58.2 | 73.5  | 58.4 | 77.6 |
| chr2  | Gylt1b        | Intron11 | N | 92210141  | 92210333  | 1  | 52.9 | 75.6  | 60.2 | 78.7 |
| chr5  | Nrbp1         | Intron11 | N | 31552055  | 31552261  | 1  | 70.0 | 90.4  | 77.8 | 95.2 |
| chr9  | Anxa2         | Intron11 | N | 69335921  | 69337458  | 8  | 55.3 | 81.3  | 57.7 | 75.1 |
| chr6  | St7           | Intron11 | N | 17854970  | 17856407  | 7  | 46.0 | 62.4  | 61.4 | 78.2 |
| chr10 | Hmha1         | Intron11 | N | 79487597  | 79488153  | 3  | 41.3 | 65.1  | 44.6 | 60.8 |
| chr11 | Evpl          | Intron11 | N | 116091438 | 116091729 | 1  | 43.0 | 66.3  | 38.3 | 54.3 |
| chr6  | Wee2          | Intron11 | N | 40414282  | 40415814  | 8  | 9.5  | 31.0  | 75.0 | 90.9 |
| chr17 | Fam179a       | Intron11 | N | 72054182  | 72055118  | 5  | 20.7 | 40.9  | 30.0 | 45.8 |
| chr10 | Tbc1d15       | Intron11 | N | 114657465 | 114658638 | 6  | 51.6 | 89.6  | 72.9 | 87.9 |
| chr12 | Rps6kl1       | Intron10 | N | 86490859  | 86492112  | 4  | 16.7 | 68.4  | 27.3 | 72.1 |
| chr17 | Abhd16a       | Intron10 | N | 35237344  | 35237583  | 1  | 23.6 | 48.6  | 20.8 | 54.1 |
| chr15 | Gga1          | Intron10 | N | 78719541  | 78720145  | 3  | 37.9 | 67.2  | 26.8 | 59.6 |
| chr4  | Cyp4x1        | Intron10 | N | 114799211 | 114800045 | 4  | 64.4 | 81.7  | 58.6 | 90.0 |
| chr15 | Col22a1       | Intron10 | N | 71650515  | 71652359  | 9  | 69.6 | 91.5  | 67.3 | 96.8 |
| chr2  | Grb14         | Intron10 | N | 64774549  | 64776425  | 9  | 46.7 | 70.0  | 49.0 | 76.6 |
| chr4  | Lck           | Intron10 | N | 129234700 | 129234869 | 1  | 63.8 | 93.2  | 62.8 | 90.1 |
| chr10 | Stat6         | Intron10 | N | 127090129 | 127090262 | 1  | 69.2 | 85.9  | 62.4 | 88.5 |

|       |               |          |   |           |           |    |      |      |      |      |
|-------|---------------|----------|---|-----------|-----------|----|------|------|------|------|
| chr9  | Vps13c        | Intron10 | N | 67724094  | 67725903  | 9  | 64.4 | 85.8 | 62.6 | 88.6 |
| chr14 | Fam35a        | Intron10 | N | 35122281  | 35123352  | 4  | 55.7 | 71.0 | 52.3 | 76.8 |
| chr1  | Vil1          | Intron10 | N | 74469655  | 74470248  | 3  | 63.2 | 85.9 | 62.3 | 85.0 |
| chr1  | Acsl3         | Intron10 | N | 78693605  | 78695570  | 10 | 60.4 | 75.5 | 60.3 | 82.5 |
| chr6  | Calcr         | Intron10 | N | 3664762   | 3667091   | 12 | 65.7 | 93.9 | 64.7 | 84.8 |
| chr15 | Nrbp2         | Intron10 | N | 75920096  | 75920177  | 1  | 61.3 | 84.8 | 65.4 | 84.6 |
| chr11 | Dnah2         | Intron10 | N | 69242995  | 69243975  | 5  | 16.1 | 95.2 | 45.2 | 63.5 |
| chr12 | Ppp1r13b      | Intron10 | N | 113079309 | 113081755 | 12 | 43.1 | 62.8 | 45.1 | 63.3 |
| chr19 | Pde6c         | Intron10 | N | 38233049  | 38234202  | 6  | 59.2 | 77.4 | 55.4 | 73.0 |
| chr2  | D630003M21Rik | Intron10 | N | 158035959 | 158037355 | 7  | 47.6 | 65.2 | 45.0 | 62.1 |
| chr9  | Sema7a        | Intron10 | N | 57805513  | 57808061  | 13 | 66.4 | 86.6 | 67.4 | 84.2 |
| chr7  | Syce1         | Intron10 | N | 147966431 | 147966773 | 2  | 59.5 | 75.5 | 45.9 | 62.5 |
| chr11 | Stat5b        | Intron10 | N | 100658020 | 100658377 | 2  | 63.6 | 85.3 | 67.7 | 84.2 |
| chr12 | Lrrc9         | Intron10 | N | 73561910  | 73564311  | 12 | 40.1 | 63.3 | 48.7 | 63.9 |
| chr5  | Grid2ip       | Intron10 | N | 144142183 | 144143261 | 5  | 59.2 | 85.0 | 58.3 | 73.5 |
| chr10 | Gls2          | Intron10 | N | 127641784 | 127641916 | 1  | 36.4 | 62.1 | 46.7 | 61.8 |
| chr1  | Mptx1         | Intron1  | N | 176260768 | 176262324 | 8  | 43.5 | 97.1 | 35.0 | 94.7 |
| chr4  | Cdkn2c        | Intron1  | N | 109334232 | 109337622 | 17 | 18.0 | 88.2 | 34.0 | 88.1 |
| chr15 | Fam83h        | Intron1  | N | 75835180  | 75835370  | 1  | 50.0 | 65.0 | 31.8 | 81.6 |
| chr2  | Abcb11        | Intron1  | N | 69077342  | 69081471  | 21 | 6.7  | 32.8 | 6.0  | 46.7 |
| chr10 | 1600002K03Rik | Intron1  | N | 79635920  | 79636953  | 3  | 0.0  | 90.7 | 45.3 | 83.9 |
| chr8  | Rhou          | Intron1  | N | 126178117 | 126179391 | 4  | 48.4 | 74.3 | 41.2 | 78.1 |
| chr18 | Pmaip1        | Intron1  | N | 66618467  | 66620496  | 6  | 44.0 | 73.9 | 37.3 | 73.8 |
| chr1  | Cnot11        | Intron1  | N | 39593183  | 39594260  | 4  | 33.0 | 63.1 | 33.9 | 67.9 |
| chr11 | Dlx4          | Intron1  | N | 95002784  | 95003102  | 2  | 58.3 | 75.0 | 57.1 | 90.9 |
| chr19 | 5830416P10Rik | Intron1  | N | 53518038  | 53519739  | 9  | 45.4 | 86.9 | 56.5 | 89.3 |
| chr6  | Vwf           | Intron1  | N | 125503218 | 125504470 | 7  | 40.2 | 63.6 | 21.0 | 53.0 |
| chr5  | Mrpl1         | Intron1  | N | 96639213  | 96642805  | 16 | 27.0 | 52.4 | 32.5 | 64.0 |
| chr17 | Slc22a1       | Intron1  | N | 12841951  | 12843734  | 9  | 59.1 | 88.5 | 28.3 | 59.4 |
| chr9  | Bcl9l         | Intron1  | N | 44307357  | 44307530  | 1  | 47.5 | 71.8 | 49.2 | 79.8 |
| chr9  | 9230112J17Rik | Intron1  | N | 60373772  | 60374189  | 2  | 46.5 | 74.0 | 43.0 | 72.4 |
| chr15 | Sh3bp1        | Intron1  | N | 78730392  | 78731575  | 4  | 27.0 | 65.7 | 29.4 | 58.7 |
| chr8  | 4933405L10Rik | Intron1  | N | 108232416 | 108232695 | 2  | 60.2 | 93.9 | 62.6 | 90.8 |
| chr4  | Cdkn2b        | Intron1  | N | 88953224  | 88956574  | 14 | 12.5 | 43.4 | 9.8  | 37.7 |
| chr11 | Ehbp1         | Intron1  | N | 21906875  | 21907085  | 1  | 54.6 | 90.9 | 61.2 | 88.2 |
| chr19 | Hhex          | Intron1  | N | 37509724  | 37511678  | 7  | 41.7 | 74.2 | 49.2 | 76.0 |
| chr1  | Ormdl1        | Intron1  | N | 53354033  | 53355815  | 7  | 34.2 | 56.8 | 71.0 | 97.6 |
| chr4  | Acot11        | Intron1  | N | 106421090 | 106421866 | 5  | 57.2 | 89.4 | 65.3 | 91.9 |
| chr13 | Irx4          | Intron1  | N | 73398325  | 73402295  | 9  | 26.5 | 61.5 | 32.6 | 57.9 |
| chr13 | Wrnip1        | Intron1  | N | 32894914  | 32897206  | 10 | 28.5 | 74.7 | 52.0 | 77.1 |
| chr19 | Klc2          | Intron1  | N | 5108689   | 5109102   | 2  | 12.8 | 56.5 | 11.4 | 36.4 |
| chr2  | Duoxa2        | Intron1  | N | 122124924 | 122125883 | 4  | 27.5 | 69.9 | 28.9 | 52.9 |
| chr13 | Hist1h2bp     | Intron1  | N | 21879761  | 21880892  | 6  | 57.8 | 96.3 | 52.1 | 76.1 |
| chr10 | Ascc1         | Intron1  | N | 59465656  | 59467542  | 6  | 7.0  | 52.7 | 34.2 | 57.9 |
| chr2  | Bmi1          | Intron1  | N | 18599097  | 18603419  | 15 | 34.3 | 58.7 | 49.4 | 73.0 |
| chr2  | Catsper2      | Intron1  | N | 121220224 | 121222688 | 12 | 49.7 | 66.5 | 14.6 | 37.6 |
| chr16 | Aifm3         | Intron1  | N | 17489985  | 17491385  | 5  | 60.0 | 77.7 | 60.1 | 83.0 |
| chr11 | Wdr81         | Intron1  | N | 75255592  | 75257756  | 11 | 64.3 | 79.9 | 63.2 | 85.5 |
| chr7  | 1810026B05Rik | Intron1  | N | 80689269  | 80694482  | 25 | 46.2 | 67.0 | 73.5 | 95.5 |

|       |               |               |   |           |           |     |      |      |      |      |
|-------|---------------|---------------|---|-----------|-----------|-----|------|------|------|------|
| chr1  | Adamts4       | Intron1       | N | 173181601 | 173182667 | 5   | 32.0 | 48.8 | 26.5 | 48.4 |
| chr10 | Rab32         | Intron1       | N | 10266250  | 10270476  | 21  | 32.3 | 65.6 | 55.6 | 77.3 |
| chr5  | Acad12        | Intron1       | N | 122048972 | 122049203 | 1   | 70.3 | 91.0 | 68.1 | 89.7 |
| chr16 | Tnp2          | Intron1       | N | 10788187  | 10788357  | 1   | 64.4 | 85.9 | 71.4 | 92.9 |
| chr11 | Atp6v0a1      | Intron1       | N | 100870879 | 100873070 | 8   | 34.0 | 60.3 | 27.3 | 48.8 |
| chr11 | Pctp          | Intron1       | N | 89846071  | 89847406  | 7   | 12.8 | 60.1 | 40.4 | 61.8 |
| chr19 | Sec31b        | Intron1       | N | 44591979  | 44592129  | 1   | 59.2 | 79.5 | 63.9 | 85.1 |
| chr17 | Dync2li1      | Intron1       | N | 85025917  | 85027624  | 7   | 53.5 | 70.0 | 40.3 | 61.4 |
| chr14 | Arhgef40      | Intron1       | N | 52604667  | 52607077  | 7   | 45.5 | 61.5 | 50.4 | 71.4 |
| chr2  | Pacsin3       | Intron1       | N | 91097084  | 91100024  | 12  | 47.9 | 76.8 | 50.7 | 71.5 |
| chr11 | Gm11961       | Intron1       | N | 4525507   | 4526421   | 5   | 70.5 | 88.9 | 75.4 | 96.2 |
| chr6  | Hoxa3         | Intron1       | N | 52120742  | 52122119  | 5   | 69.9 | 90.1 | 65.0 | 85.7 |
| chr11 | Hes7          | Intron1       | N | 68934018  | 68935011  | 2   | 7.1  | 48.0 | 16.9 | 37.5 |
| chr11 | Hand1         | Intron1       | N | 57643209  | 57644745  | 6   | 66.2 | 81.8 | 63.1 | 83.4 |
| chr15 | Fam109b       | Intron1       | N | 82171702  | 82173488  | 8   | 34.8 | 79.3 | 52.0 | 72.3 |
| chr7  | Pkp3          | Intron1       | N | 148264334 | 148265804 | 8   | 65.8 | 83.5 | 49.0 | 69.0 |
| chr3  | Sfrp2         | Intron1       | N | 83570966  | 83573247  | 11  | 49.8 | 68.2 | 43.7 | 63.5 |
| chr19 | Snx15         | Intron1       | N | 6119955   | 6120485   | 3   | 29.6 | 51.0 | 26.7 | 46.5 |
| chr7  | Tpcn2         | Intron1       | N | 152440604 | 152441355 | 4   | 65.7 | 88.5 | 70.3 | 90.0 |
| chr5  | Pdx1          | Intron1       | N | 148082224 | 148085955 | 18  | 43.9 | 60.2 | 37.5 | 57.1 |
| chr4  | Mxra8         | Intron1       | N | 155214000 | 155214886 | 4   | 41.6 | 64.3 | 52.1 | 71.5 |
| chr14 | Jph4          | Intron1       | N | 55727233  | 55728122  | 4   | 45.8 | 69.2 | 27.5 | 46.6 |
| chr11 | Pemt          | Intron1       | N | 59784378  | 59784685  | 2   | 61.8 | 94.0 | 65.2 | 83.8 |
| chr16 | Upk1b         | Intron1       | N | 38774259  | 38776299  | 10  | 63.4 | 85.5 | 74.1 | 92.6 |
| chr6  | Tmem52b       | Intron1       | N | 129463123 | 129464231 | 6   | 0.0  | 37.9 | 77.4 | 95.7 |
| chr8  | Mtss1l        | Intron1       | N | 113245691 | 113250093 | 18  | 61.8 | 82.5 | 62.5 | 80.7 |
| chr4  | Eno1          | Intron1       | N | 149611450 | 149613581 | 8   | 8.8  | 38.8 | 14.8 | 32.9 |
| chr17 | Gm7325        | Intron1       | N | 45738635  | 45738959  | 2   | 18.3 | 36.7 | 19.7 | 37.7 |
| chr6  | Snrpg         | Intron1       | N | 86321609  | 86325670  | 18  | 44.9 | 63.1 | 39.6 | 57.7 |
| chr3  | Wls           | Intron1       | N | 159503012 | 159535872 | 143 | 46.3 | 64.6 | 46.2 | 64.2 |
| chr14 | Akap11        | Intron1       | N | 78895754  | 78898641  | 13  | 79.2 | 94.4 | 73.3 | 91.3 |
| chr16 |               | 5-Sep Intron1 | N | 18622890  | 18623007  | 2   | 64.1 | 89.1 | 67.8 | 85.7 |
| chr3  | Nes           | Intron1       | N | 87775911  | 87776913  | 3   | 16.8 | 41.8 | 31.6 | 49.6 |
| chr7  | Gm15413       | Intron1       | N | 103941338 | 103944027 | 12  | 40.5 | 58.3 | 61.7 | 79.6 |
| chr7  | Ppp1r14a      | Intron1       | N | 30074555  | 30076528  | 8   | 69.5 | 95.8 | 72.5 | 90.4 |
| chr5  | 4930568K20Rik | Intron1       | N | 124680035 | 124680474 | 2   | 30.8 | 56.3 | 34.1 | 51.7 |
| chr11 | Slc47a1       | Intron1       | N | 61158031  | 61162160  | 21  | 64.1 | 79.1 | 57.7 | 75.2 |
| chr11 | Stat3         | Intron1       | N | 100750075 | 100750791 | 5   | 45.8 | 73.9 | 61.1 | 78.5 |
| chr10 | 1810043G02Rik | Intron1       | N | 77441527  | 77442497  | 3   | 25.3 | 40.8 | 32.8 | 50.2 |
| chr5  | 2410018M08Rik | Intron1       | N | 130371723 | 130375052 | 15  | 41.1 | 71.2 | 57.6 | 74.5 |
| chr18 | 4930592I03Rik | Intron1       | N | 83088623  | 83089542  | 5   | 76.4 | 94.2 | 72.5 | 89.4 |
| chr4  | Tlr4          | Intron1       | N | 66488956  | 66494927  | 28  | 21.1 | 57.1 | 56.8 | 73.5 |
| chr5  | Hpd           | Intron1       | N | 123622098 | 123622178 | 1   | 22.4 | 47.8 | 11.8 | 28.4 |
| chr14 | Ccdc25        | Intron1       | N | 66456322  | 66459284  | 12  | 2.7  | 61.7 | 45.0 | 61.6 |
| chr4  | Myom3         | Intron1       | N | 135315722 | 135318416 | 13  | 61.6 | 82.7 | 64.0 | 80.4 |
| chr7  | Th            | Intron1       | N | 150079096 | 150079912 | 4   | 37.1 | 71.2 | 49.8 | 66.1 |
| chr16 | Morc1         | Intron1       | N | 48431516  | 48437387  | 28  | 66.8 | 83.2 | 71.2 | 87.5 |
| chr17 | Yipf4         | Intron1       | N | 74889135  | 74891685  | 11  | 53.6 | 79.2 | 43.0 | 59.2 |
| chr4  | Fam46b        | Intron1       | N | 133036479 | 133041998 | 23  | 51.3 | 74.8 | 50.3 | 66.4 |



|       |               |         |   |           |           |    |      |      |      |      |
|-------|---------------|---------|---|-----------|-----------|----|------|------|------|------|
| chr10 | Smpdl3a       | Intron1 | N | 57514591  | 57520716  | 28 | 48.3 | 70.7 | 30.8 | 46.9 |
| chr19 | Cabp2         | Intron1 | N | 4082868   | 4084877   | 12 | 64.5 | 81.6 | 67.2 | 83.1 |
| chr13 | C230035116Rik | Intron1 | N | 23519922  | 23520173  | 1  | 79.4 | 97.1 | 78.7 | 94.4 |
| chr7  | Gm9999        | Intron1 | N | 54232077  | 54238951  | 34 | 51.2 | 69.4 | 64.2 | 79.5 |
| chr7  | 4933406J10Rik | Intron1 | N | 89892294  | 89892983  | 3  | 45.3 | 72.0 | 62.7 | 78.0 |
| chr1  | Stat4         | Intron1 | N | 52065573  | 52068626  | 16 | 27.8 | 48.0 | 20.8 | 36.0 |
| chr10 | Nfic          | Intron1 | N | 80863817  | 80867568  | 20 | 61.6 | 77.6 | 40.0 | 55.2 |
| chr1  | Hmcn1         | Exon90  | N | 152603653 | 152603748 | 1  | 50.9 | 76.0 | 54.7 | 71.6 |
| chr9  | Zmynd10       | Exon9   | N | 107452829 | 107452950 | 2  | 43.1 | 81.0 | 46.4 | 78.9 |
| chr4  | Fgr           | Exon9   | N | 132553883 | 132553959 | 1  | 16.0 | 63.2 | 31.3 | 59.6 |
| chr2  | Pdk1          | Exon9   | N | 71735704  | 71735817  | 1  | 62.5 | 91.4 | 67.5 | 90.5 |
| chr14 | Piwil2        | Exon9   | N | 70797951  | 70798091  | 1  | 40.2 | 67.5 | 28.4 | 50.7 |
| chr3  | Fndc7         | Exon9   | N | 108684244 | 108684504 | 1  | 46.6 | 84.2 | 51.4 | 73.1 |
| chr17 | Ddr1          | Exon9   | N | 35825731  | 35825814  | 1  | 58.1 | 82.6 | 66.7 | 88.4 |
| chr11 | Pitpna        | Exon9   | N | 75438967  | 75439032  | 2  | 56.6 | 75.9 | 60.9 | 80.7 |
| chr15 | Nrbp2         | Exon9   | N | 75920040  | 75920095  | 2  | 61.3 | 84.8 | 65.4 | 84.6 |
| chr10 | Adarb1        | Exon9   | N | 76822312  | 76822480  | 2  | 28.6 | 48.9 | 10.5 | 27.7 |
| chr9  | Vwa5a         | Exon9   | N | 38535579  | 38535723  | 1  | 38.5 | 54.2 | 56.4 | 73.3 |
| chr11 | Myh13         | Exon9   | N | 67151143  | 67151281  | 1  | 68.3 | 87.5 | 71.0 | 87.5 |
| chr15 | Dennd3        | Exon9   | N | 73373150  | 73373246  | 1  | 44.0 | 60.0 | 46.2 | 61.2 |
| chr2  | Src           | Exon8   | N | 157290365 | 157290514 | 1  | 47.8 | 72.6 | 37.0 | 72.7 |
| chr12 | Ptprn2        | Exon8   | N | 118114463 | 118114845 | 2  | 23.8 | 58.7 | 58.2 | 88.3 |
| chr7  | Sigirr        | Exon8   | N | 148280681 | 148281216 | 4  | 17.5 | 52.0 | 22.0 | 50.5 |
| chr14 | Sorbs3        | Exon8   | N | 70591240  | 70591382  | 2  | 23.0 | 50.1 | 17.8 | 41.5 |
| chr5  | Pcgf3         | Exon8   | N | 108924853 | 108924990 | 1  | 69.8 | 87.8 | 60.7 | 82.9 |
| chr11 | Wnk4          | Exon8   | N | 101130376 | 101130434 | 1  | 70.0 | 86.8 | 71.9 | 92.9 |
| chr4  | Grhl3         | Exon8   | N | 135110428 | 135110522 | 1  | 16.9 | 41.7 | 18.1 | 38.0 |
| chr5  | Agfg2         | Exon8   | N | 138105444 | 138105600 | 1  | 50.0 | 84.1 | 48.5 | 67.7 |
| chr5  | Mlxipl        | Exon8   | N | 135608185 | 135608731 | 3  | 57.3 | 80.5 | 54.4 | 73.6 |
| chr4  | Acot11        | Exon8   | N | 106430911 | 106431030 | 1  | 48.9 | 68.0 | 52.2 | 71.2 |
| chr6  | Gnb3          | Exon8   | N | 124789682 | 124789768 | 2  | 23.0 | 56.9 | 45.1 | 63.5 |
| chr8  | Ces2e         | Exon8   | N | 107455742 | 107455886 | 1  | 45.7 | 66.7 | 61.1 | 78.6 |
| chr18 | Zfp608        | Exon8   | N | 55147265  | 55148360  | 3  | 3.6  | 33.3 | 9.4  | 26.5 |
| chr18 | Megf10        | Exon8   | N | 57412488  | 57412700  | 1  | 30.8 | 48.9 | 25.9 | 42.2 |
| chr16 | Prkdc         | Exon75  | N | 15816844  | 15816987  | 1  | 53.4 | 91.5 | 57.1 | 79.7 |
| chr16 | Mgrn1         | Exon7   | N | 4918866   | 4918913   | 1  | 38.5 | 72.0 | 29.0 | 65.7 |
| chr8  | Col4a2        | Exon7   | N | 11402163  | 11402234  | 1  | 22.7 | 75.3 | 18.4 | 47.0 |
| chr7  | Myh14         | Exon7   | N | 51870715  | 51870876  | 1  | 56.4 | 78.7 | 58.4 | 84.4 |
| chr5  | Mlxipl        | Exon7   | N | 135604383 | 135604567 | 1  | 58.2 | 89.9 | 66.7 | 92.0 |
| chr17 | Rgs11         | Exon7   | N | 26342053  | 26342134  | 1  | 71.9 | 94.3 | 67.1 | 90.7 |
| chr11 | Card14        | Exon7   | N | 119187369 | 119187494 | 1  | 77.4 | 95.6 | 73.0 | 95.3 |
| chr4  | Serinc2       | Exon7   | N | 129941505 | 129941695 | 1  | 51.5 | 71.7 | 54.4 | 76.3 |
| chr7  | Ap3b2         | Exon7   | N | 88609517  | 88609697  | 1  | 32.2 | 55.4 | 40.5 | 60.2 |
| chr4  | Padi2         | Exon7   | N | 140488662 | 140488765 | 1  | 57.5 | 76.6 | 61.7 | 81.1 |
| chr3  | Larp7         | Exon7   | N | 127249394 | 127249487 | 2  | 53.1 | 89.7 | 61.9 | 80.9 |
| chr4  | Foxj3         | Exon7   | N | 119291889 | 119292069 | 1  | 60.7 | 82.2 | 67.2 | 85.4 |
| chr4  | Catsper4      | Exon7   | N | 133777435 | 133777536 | 1  | 61.2 | 79.2 | 58.3 | 76.3 |
| chr10 | Mfsd12        | Exon7   | N | 80825678  | 80825772  | 2  | 45.3 | 60.6 | 39.9 | 57.5 |
| chr5  | Acacb         | Exon7   | N | 114642083 | 114642193 | 1  | 37.2 | 61.9 | 41.5 | 56.9 |

|       |           |        |   |           |           |   |      |       |      |       |
|-------|-----------|--------|---|-----------|-----------|---|------|-------|------|-------|
| chr8  | Zdhhc1    | Exon7  | N | 108000917 | 108001018 | 1 | 58.1 | 75.3  | 58.8 | 74.1  |
| chr7  | Myh14     | Exon6  | N | 51869663  | 51869791  | 1 | 34.7 | 82.1  | 42.6 | 75.3  |
| chr1  | Sec16b    | Exon6  | N | 159463210 | 159463309 | 1 | 63.3 | 91.3  | 57.4 | 85.7  |
| chr15 | St3gal1   | Exon6  | N | 66960115  | 66960169  | 2 | 43.8 | 64.8  | 51.5 | 79.0  |
| chr17 | Runx2     | Exon6  | N | 44951118  | 44951241  | 2 | 41.5 | 60.5  | 40.9 | 65.7  |
| chr7  | Ush1c     | Exon6  | N | 53457003  | 53457044  | 1 | 59.6 | 82.9  | 58.9 | 81.8  |
| chr2  | Nr4a2     | Exon6  | N | 56965362  | 56965483  | 2 | 64.4 | 84.7  | 65.2 | 85.6  |
| chr17 | Dennd1c   | Exon6  | N | 57209536  | 57209607  | 1 | 61.7 | 88.1  | 62.7 | 82.1  |
| chr4  | Phc2      | Exon6  | N | 128389303 | 128389603 | 2 | 28.4 | 59.3  | 26.5 | 45.3  |
| chr4  | Pink1     | Exon6  | N | 137876653 | 137876937 | 1 | 53.2 | 73.4  | 50.0 | 68.3  |
| chr7  | Phldb3    | Exon6  | N | 25404401  | 25404484  | 1 | 26.3 | 52.0  | 32.8 | 50.8  |
| chr17 | Arid1b    | Exon6  | N | 5279203   | 5279382   | 1 | 66.4 | 85.9  | 72.0 | 89.9  |
| chr2  | Ptptra    | Exon6  | N | 130357825 | 130357915 | 1 | 69.4 | 84.6  | 59.5 | 76.9  |
| chr1  | Stk16     | Exon6  | N | 75210151  | 75210272  | 1 | 78.3 | 100.0 | 83.3 | 100.0 |
| chr17 | Smoc2     | Exon6  | N | 14485711  | 14485785  | 1 | 37.2 | 68.4  | 58.8 | 75.4  |
| chr12 | Numb      | Exon6  | N | 85152236  | 85152310  | 1 | 60.3 | 84.6  | 72.2 | 88.4  |
| chr7  | Tmc5      | Exon6  | N | 125783434 | 125783521 | 1 | 10.0 | 26.7  | 25.0 | 40.9  |
| chr7  | Ate1      | Exon6  | N | 137650996 | 137651213 | 1 | 64.7 | 82.6  | 66.2 | 81.7  |
| chr9  | Vps13c    | Exon56 | N | 67793631  | 67793895  | 1 | 49.7 | 66.7  | 42.8 | 65.2  |
| chr18 | Gnpda1    | Exon5  | N | 38497745  | 38497876  | 1 | 11.8 | 46.7  | 10.5 | 48.8  |
| chr2  | Prdm11    | Exon5  | N | 92853922  | 92854046  | 2 | 11.4 | 40.8  | 20.9 | 57.1  |
| chr12 | Fam228b   | Exon5  | N | 4775196   | 4775327   | 2 | 42.5 | 90.5  | 63.3 | 95.7  |
| chr5  | Atraid    | Exon5  | N | 31356334  | 31356431  | 2 | 52.6 | 87.1  | 54.6 | 86.7  |
| chr10 | Tac2      | Exon5  | N | 127166170 | 127166223 | 1 | 12.5 | 58.1  | 30.2 | 60.0  |
| chr7  | Flt3l     | Exon5  | N | 52390492  | 52390545  | 1 | 36.1 | 78.6  | 28.6 | 57.4  |
| chr17 | Mocs1     | Exon5  | N | 49588760  | 49588871  | 1 | 48.3 | 80.9  | 47.0 | 75.0  |
| chr7  | Ilk       | Exon5  | N | 112889474 | 112889557 | 1 | 57.3 | 77.6  | 56.5 | 82.2  |
| chr1  | Lamc2     | Exon5  | N | 154977780 | 154977929 | 1 | 41.1 | 76.7  | 56.9 | 79.9  |
| chr1  | Als2cr12  | Exon5  | N | 58724573  | 58724672  | 1 | 53.8 | 70.2  | 42.7 | 64.9  |
| chr4  | Faah      | Exon5  | N | 115673709 | 115673808 | 1 | 68.2 | 88.6  | 59.7 | 81.8  |
| chr2  | Rapgef4   | Exon5  | N | 71979210  | 71979229  | 1 | 56.6 | 74.7  | 64.6 | 85.6  |
| chr19 | Exoc6     | Exon5  | N | 37651426  | 37651630  | 1 | 25.7 | 52.5  | 20.5 | 39.9  |
| chr13 | Slc25a48  | Exon5  | N | 56566316  | 56566449  | 1 | 39.1 | 71.4  | 49.6 | 68.6  |
| chr8  | Dync1li2  | Exon5  | N | 106949859 | 106949970 | 1 | 65.1 | 89.5  | 73.6 | 92.1  |
| chr15 | Lmbr1l    | Exon5  | N | 98738325  | 98738402  | 1 | 37.3 | 57.7  | 30.2 | 48.5  |
| chr11 | Ttll6     | Exon5  | N | 96000944  | 96001087  | 1 | 36.6 | 63.2  | 28.9 | 46.4  |
| chr2  | Bpi       | Exon5  | N | 158093467 | 158093530 | 1 | 56.5 | 84.0  | 72.7 | 90.0  |
| chr1  | Pm20d1    | Exon5  | N | 133699297 | 133699416 | 1 | 50.0 | 78.2  | 58.2 | 75.4  |
| chr6  | Cpa2      | Exon5  | N | 30499242  | 30499340  | 1 | 56.8 | 77.7  | 62.5 | 79.3  |
| chr18 | Spink5    | Exon5  | N | 44140786  | 44140849  | 1 | 56.7 | 80.9  | 51.4 | 67.7  |
| chr15 | Tmem184b  | Exon5  | N | 79200328  | 79200418  | 2 | 49.2 | 66.3  | 43.8 | 59.9  |
| chr13 | Erbp2ip   | Exon5  | N | 104620268 | 104620411 | 1 | 39.6 | 75.6  | 66.7 | 82.5  |
| chr15 | Apobec3   | Exon5  | N | 79735874  | 79736030  | 1 | 55.6 | 75.9  | 57.6 | 73.0  |
| chr9  | Dock6     | Exon48 | N | 21651629  | 21651716  | 1 | 42.5 | 79.4  | 33.9 | 74.8  |
| chr4  | Tceb3     | Exon4  | N | 135564961 | 135565058 | 1 | 42.9 | 92.0  | 31.4 | 87.5  |
| chr11 | Trim7     | Exon4  | N | 48661527  | 48661642  | 1 | 50.0 | 79.4  | 34.9 | 76.4  |
| chr4  | Epb4.1l4b | Exon4  | N | 57086134  | 57086243  | 1 | 38.2 | 62.0  | 32.8 | 65.1  |
| chr8  | BC068157  | Exon4  | N | 4216182   | 4216555   | 1 | 35.8 | 63.0  | 39.0 | 67.9  |
| chr14 | Ecd       | Exon4  | N | 21148105  | 21148211  | 1 | 18.1 | 55.4  | 32.9 | 61.7  |

|       |               |             |   |           |           |   |      |       |      |      |
|-------|---------------|-------------|---|-----------|-----------|---|------|-------|------|------|
| chr4  | Yipf1         | Exon4       | N | 107009042 | 107009129 | 1 | 61.9 | 80.0  | 52.3 | 78.8 |
| chr4  | Clic4         | Exon4       | N | 134794777 | 134794886 | 1 | 26.6 | 47.4  | 35.0 | 60.6 |
| chr19 | Aldh1a7       | Exon4       | N | 20782640  | 20782824  | 1 | 55.1 | 73.6  | 55.1 | 80.3 |
| chr9  | Slc24a1       | Exon4       | N | 64778987  | 64779078  | 1 | 62.2 | 87.2  | 66.3 | 90.8 |
| chr6  | Foxp1         | Exon4       | N | 98894613  | 98894714  | 1 | 48.1 | 65.2  | 43.0 | 66.0 |
| chr2  | Gata5         | Exon4       | N | 180067001 | 180067176 | 2 | 65.5 | 83.3  | 64.3 | 86.8 |
| chr19 | Ostf1         | Exon4       | N | 18664891  | 18664998  | 1 | 31.3 | 48.6  | 26.8 | 49.3 |
| chr16 |               | 5-Sep Exon4 | N | 18624204  | 18624305  | 1 | 60.9 | 90.6  | 64.6 | 86.4 |
| chr17 | Ccdc64b       | Exon4       | N | 23802909  | 23803055  | 1 | 64.4 | 85.7  | 65.3 | 86.6 |
| chr2  | MacroD2       | Exon4       | N | 140849761 | 140849877 | 1 | 47.9 | 69.2  | 51.9 | 73.1 |
| chr17 | Tfeb          | Exon4       | N | 47924975  | 47925095  | 1 | 58.5 | 80.8  | 55.3 | 75.9 |
| chr13 | Jarid2        | Exon4       | N | 44969652  | 44969821  | 1 | 16.4 | 42.0  | 18.8 | 37.9 |
| chr5  | Fndc4         | Exon4       | N | 31597379  | 31597494  | 1 | 34.7 | 62.8  | 33.6 | 52.3 |
| chr7  | Isoc2b        | Exon4       | N | 4802995   | 4803135   | 2 | 45.3 | 66.3  | 53.2 | 71.5 |
| chr15 | 9130401M01Rik | Exon4       | N | 57863539  | 57863634  | 1 | 61.7 | 91.2  | 63.1 | 81.3 |
| chr2  | Nutm1         | Exon4       | N | 112093659 | 112093787 | 1 | 35.0 | 62.4  | 35.7 | 53.8 |
| chr5  | C530008M17Rik | Exon4       | N | 77283960  | 77284142  | 1 | 64.0 | 88.3  | 59.3 | 76.8 |
| chr19 | Pten          | Exon4       | N | 32874351  | 32874589  | 1 | 32.4 | 73.5  | 50.7 | 67.6 |
| chr11 | Gm11201       | Exon4       | N | 78844363  | 78844642  | 1 | 17.5 | 39.5  | 24.6 | 41.4 |
| chr3  | Ppa2          | Exon4       | N | 132993357 | 132993476 | 1 | 71.2 | 89.0  | 58.4 | 75.2 |
| chr2  | Vapb          | Exon4       | N | 173601613 | 173601789 | 1 | 52.2 | 78.1  | 55.7 | 72.3 |
| chr9  | Snx22         | Exon4       | N | 65916493  | 65916597  | 1 | 46.9 | 63.4  | 52.0 | 68.5 |
| chr17 | Foxp4         | Exon4       | N | 48011584  | 48011685  | 1 | 64.0 | 80.7  | 59.8 | 76.0 |
| chr4  | Slc2a5        | Exon4       | N | 149500235 | 149500395 | 1 | 54.8 | 80.7  | 48.0 | 64.1 |
| chr5  | Scfd2         | Exon4       | N | 74793679  | 74793928  | 1 | 75.2 | 91.3  | 63.0 | 78.9 |
| chr7  | Flt3l         | Exon4       | N | 52389743  | 52389886  | 1 | 54.8 | 77.0  | 61.2 | 76.7 |
| chr11 | Shroom1       | Exon4       | N | 53278998  | 53279546  | 3 | 69.2 | 88.5  | 70.2 | 85.6 |
| chr3  | Lrba          | Exon38      | N | 86343825  | 86343971  | 1 | 44.7 | 68.1  | 48.5 | 73.4 |
| chr8  | Fanca         | Exon33      | N | 125830325 | 125830388 | 1 | 69.2 | 88.9  | 78.6 | 95.6 |
| chr2  | Myh7b         | Exon32      | N | 155456747 | 155457096 | 2 | 48.6 | 68.6  | 48.8 | 71.0 |
| chr2  | Chd6          | Exon32      | N | 160864930 | 160865079 | 1 | 55.0 | 72.8  | 60.3 | 78.2 |
| chr14 | Dock9         | Exon30      | N | 122024378 | 122024467 | 1 | 65.1 | 100.0 | 54.2 | 87.5 |
| chr15 | Nrbp2         | Exon3       | N | 75917951  | 75918004  | 1 | 10.5 | 48.2  | 14.4 | 50.0 |
| chr10 | Dctn2         | Exon3       | N | 126711770 | 126711866 | 1 | 34.8 | 76.7  | 45.1 | 76.6 |
| chr5  | Wbscr25       | Exon3       | N | 135472429 | 135472539 | 1 | 17.4 | 50.0  | 31.3 | 62.2 |
| chr16 | Pcyt1a        | Exon3       | N | 32462087  | 32462203  | 1 | 51.4 | 71.7  | 50.8 | 76.8 |
| chr9  | Icam1         | Exon3       | N | 20830756  | 20831043  | 1 | 72.7 | 89.5  | 63.8 | 88.8 |
| chr7  | Adck4         | Exon3       | N | 28018960  | 28019026  | 1 | 56.8 | 79.3  | 59.7 | 80.4 |
| chr13 | Cetn3         | Exon3       | N | 81930955  | 81931146  | 1 | 35.0 | 53.9  | 29.0 | 49.4 |
| chr4  | Ccdc171       | Exon3       | N | 83195507  | 83195681  | 1 | 57.2 | 72.9  | 58.2 | 78.6 |
| chr4  | Sytl1         | Exon3       | N | 132811649 | 132811727 | 1 | 78.0 | 95.5  | 73.7 | 93.9 |
| chr7  | Muc2          | Exon3       | N | 148879035 | 148879128 | 1 | 37.8 | 56.9  | 40.0 | 60.0 |
| chr16 | Rogdi         | Exon3       | N | 5010133   | 5010246   | 1 | 78.9 | 95.6  | 72.2 | 92.2 |
| chr17 | C3            | Exon3       | N | 57344720  | 57344803  | 1 | 51.1 | 73.9  | 66.9 | 86.4 |
| chr9  | Rassf1        | Exon3       | N | 107460101 | 107460398 | 1 | 55.3 | 75.0  | 59.4 | 77.0 |
| chr19 | Entpd7        | Exon3       | N | 43778689  | 43778894  | 1 | 11.3 | 29.1  | 11.3 | 28.1 |
| chr3  | Manba         | Exon3       | N | 135174767 | 135174937 | 1 | 50.5 | 67.7  | 45.2 | 62.0 |
| chr1  | Ccdc19        | Exon3       | N | 174462212 | 174462356 | 1 | 35.8 | 53.1  | 35.8 | 51.8 |
| chr10 | Gstt4         | Exon3       | N | 75283976  | 75284063  | 1 | 52.0 | 73.9  | 55.7 | 71.7 |

|       |               |        |   |           |           |   |      |       |      |       |
|-------|---------------|--------|---|-----------|-----------|---|------|-------|------|-------|
| chr14 | Fermt2        | Exon3  | N | 46084399  | 46084620  | 1 | 62.0 | 82.8  | 53.4 | 69.2  |
| chr2  | Ppip5k1       | Exon3  | N | 121152588 | 121152650 | 1 | 37.4 | 53.7  | 34.1 | 49.9  |
| chr11 | Itgb4         | Exon29 | N | 115861857 | 115861994 | 1 | 72.7 | 93.7  | 72.2 | 94.4  |
| chr9  | Sorl1         | Exon26 | N | 41832379  | 41832552  | 1 | 51.5 | 73.0  | 42.1 | 63.0  |
| chr16 | Dopey2        | Exon26 | N | 93793332  | 93793476  | 1 | 50.9 | 70.7  | 44.1 | 62.8  |
| chr10 | Baz2a         | Exon26 | N | 127562555 | 127562701 | 1 | 75.0 | 95.5  | 72.7 | 88.0  |
| chr2  | Duox2         | Exon24 | N | 122120821 | 122120917 | 1 | 22.7 | 51.8  | 17.2 | 48.1  |
| chr4  | Map3k6        | Exon24 | N | 132807526 | 132807688 | 1 | 27.5 | 70.0  | 35.5 | 50.8  |
| chr7  | Myh14         | Exon23 | N | 51888305  | 51888374  | 1 | 43.1 | 79.7  | 45.7 | 79.7  |
| chr2  | Duox2         | Exon23 | N | 122120325 | 122120415 | 1 | 40.5 | 80.0  | 44.2 | 75.4  |
| chr2  | Fbn1          | Exon23 | N | 125166992 | 125167063 | 1 | 47.2 | 82.4  | 50.0 | 76.5  |
| chr5  | Ube3b         | Exon23 | N | 114862860 | 114862918 | 1 | 49.4 | 69.1  | 48.4 | 67.0  |
| chr12 | Wdr35         | Exon22 | N | 9028536   | 9028646   | 1 | 54.3 | 84.1  | 44.8 | 74.6  |
| chr5  | Myo1h         | Exon22 | N | 114807928 | 114808087 | 1 | 28.2 | 66.9  | 42.6 | 68.6  |
| chr5  | Ube3b         | Exon22 | N | 114862431 | 114862496 | 1 | 56.7 | 76.9  | 62.0 | 81.6  |
| chr2  | Atp9a         | Exon22 | N | 168514799 | 168514850 | 1 | 57.1 | 76.3  | 62.9 | 79.5  |
| chr19 | Tjp2          | Exon20 | N | 24209340  | 24209464  | 1 | 22.7 | 67.0  | 33.9 | 61.5  |
| chr1  | Als2          | Exon20 | N | 59244579  | 59244710  | 1 | 64.5 | 80.8  | 63.9 | 84.6  |
| chr14 | Lect1         | Exon2  | N | 80045170  | 80045323  | 1 | 39.6 | 60.9  | 18.4 | 65.6  |
| chr15 | Kcnh3         | Exon2  | N | 99057412  | 99057546  | 1 | 53.7 | 83.3  | 35.1 | 80.0  |
| chr2  | Btbd3         | Exon2  | N | 138105485 | 138105575 | 1 | 24.3 | 59.3  | 20.5 | 60.5  |
| chr17 | Mas1          | Exon2  | N | 13040943  | 13040986  | 1 | 36.3 | 54.9  | 28.9 | 68.9  |
| chr2  | Spef1         | Exon2  | N | 130997940 | 130997994 | 1 | 57.1 | 85.0  | 59.5 | 96.4  |
| chr13 | H2afy         | Exon2  | N | 56185557  | 56185646  | 1 | 64.0 | 83.5  | 48.0 | 80.0  |
| chr17 | Lta           | Exon2  | N | 35341503  | 35341607  | 2 | 16.7 | 41.2  | 15.8 | 47.2  |
| chr1  | Ppp1r12b      | Exon2  | N | 136670003 | 136670056 | 1 | 13.9 | 36.0  | 12.5 | 43.4  |
| chr3  | Cyr61         | Exon2  | N | 145311497 | 145311841 | 2 | 40.8 | 70.0  | 40.4 | 71.1  |
| chr5  | P2rx7         | Exon2  | N | 123104170 | 123104238 | 1 | 0.0  | 50.0  | 19.2 | 49.2  |
| chr2  | Slc20a1       | Exon2  | N | 129025919 | 129026059 | 1 | 64.8 | 86.9  | 59.8 | 87.1  |
| chr19 | Sorbs1        | Exon2  | N | 40373953  | 40374011  | 1 | 80.6 | 100.0 | 74.4 | 100.0 |
| chr5  | Wbscr25       | Exon2  | N | 135468443 | 135468861 | 2 | 22.1 | 51.9  | 14.9 | 38.8  |
| chr2  | Trp53tg5      | Exon2  | N | 164298428 | 164298558 | 1 | 60.0 | 90.6  | 51.1 | 74.2  |
| chr6  | Fabp1         | Exon2  | N | 71153081  | 71153173  | 1 | 55.7 | 77.4  | 60.7 | 83.3  |
| chr6  | Atp6v0e2      | Exon2  | N | 48490039  | 48490165  | 2 | 39.4 | 80.1  | 65.1 | 87.7  |
| chr3  | Sh2d2a        | Exon2  | N | 87652280  | 87652461  | 1 | 50.0 | 78.8  | 68.1 | 90.5  |
| chr15 | Nfam1         | Exon2  | N | 82840805  | 82840903  | 1 | 52.3 | 68.6  | 50.6 | 72.9  |
| chr4  | Sepn1         | Exon2  | N | 134096738 | 134096850 | 1 | 46.7 | 79.3  | 44.8 | 66.9  |
| chr14 | Fbxl3         | Exon2  | N | 103491521 | 103491643 | 1 | 20.9 | 61.2  | 23.0 | 44.9  |
| chr19 | Rab11fip2     | Exon2  | N | 60011509  | 60011977  | 2 | 56.1 | 71.2  | 62.1 | 84.0  |
| chr19 | 1700019N19Rik | Exon2  | N | 58862025  | 58862211  | 1 | 59.2 | 78.0  | 64.2 | 86.1  |
| chr7  | Dusp8         | Exon2  | N | 149269497 | 149269656 | 1 | 14.7 | 41.0  | 15.7 | 37.1  |
| chr9  | Ulk3          | Exon2  | N | 57438468  | 57438588  | 1 | 59.3 | 80.0  | 54.4 | 75.8  |
| chr8  | Tmem66        | Exon2  | N | 35228195  | 35228594  | 2 | 67.7 | 92.4  | 59.9 | 80.6  |
| chr16 | Tagln3        | Exon2  | N | 45723036  | 45723210  | 1 | 63.4 | 90.2  | 66.7 | 86.8  |
| chr3  | Ankrd50       | Exon2  | N | 38381613  | 38382906  | 7 | 53.5 | 75.4  | 60.3 | 80.4  |
| chr8  | Rad23a        | Exon2  | N | 87361359  | 87361489  | 1 | 55.1 | 73.0  | 51.7 | 71.7  |
| chr11 | Trim65        | Exon2  | N | 115988752 | 115988929 | 1 | 19.2 | 34.7  | 19.7 | 39.2  |
| chr11 | Bzap1         | Exon2  | N | 87576283  | 87576411  | 1 | 57.6 | 90.1  | 66.9 | 86.4  |
| chr7  | Chst15        | Exon2  | N | 139439547 | 139439703 | 1 | 60.0 | 90.0  | 71.1 | 90.4  |

|       |               |        |   |           |           |   |      |       |      |      |
|-------|---------------|--------|---|-----------|-----------|---|------|-------|------|------|
| chr3  | Them5         | Exon2  | N | 94148331  | 94148469  | 1 | 78.4 | 94.8  | 74.2 | 92.6 |
| chr12 | Dnah11        | Exon2  | N | 119118925 | 119119037 | 1 | 40.9 | 65.6  | 55.1 | 72.6 |
| chr3  | Dpyd          | Exon2  | N | 118377407 | 118377489 | 1 | 73.8 | 90.3  | 68.2 | 85.7 |
| chr8  | Slc10a7       | Exon2  | N | 81049061  | 81049197  | 1 | 65.4 | 82.5  | 65.5 | 82.7 |
| chr6  | Met           | Exon2  | N | 17441227  | 17442437  | 7 | 52.4 | 68.8  | 45.6 | 62.7 |
| chr12 | Cfl2          | Exon2  | N | 55962513  | 55962820  | 2 | 54.5 | 75.0  | 63.0 | 80.0 |
| chr7  | Mrpl23        | Exon2  | N | 149721975 | 149722057 | 1 | 17.7 | 40.2  | 10.4 | 26.8 |
| chr18 | Ppargc1b      | Exon2  | N | 61462273  | 61462394  | 1 | 52.7 | 84.8  | 59.6 | 75.2 |
| chr6  | Suclg1        | Exon2  | N | 73210469  | 73210585  | 1 | 52.7 | 78.5  | 61.4 | 76.7 |
| chr8  | B930025P03Rik | Exon2  | N | 10876197  | 10876279  | 1 | 83.0 | 100.0 | 77.6 | 92.9 |
| chr10 | Rassf3        | Exon2  | N | 120853122 | 120853344 | 1 | 53.1 | 81.4  | 57.3 | 72.6 |
| chr11 | Selm          | Exon2  | N | 3416489   | 3416523   | 1 | 32.0 | 47.1  | 33.3 | 48.5 |
| chr7  | 1600016N20Rik | Exon2  | N | 148396590 | 148396786 | 2 | 60.7 | 75.9  | 55.4 | 70.5 |
| chr7  | Abcc8         | Exon19 | N | 53378228  | 53378312  | 1 | 16.7 | 33.3  | 15.1 | 38.1 |
| chr11 | Tanc2         | Exon19 | N | 105771517 | 105771640 | 1 | 50.9 | 72.7  | 30.8 | 52.1 |
| chr17 | Dennd1c       | Exon19 | N | 57214792  | 57214911  | 1 | 66.0 | 84.7  | 67.0 | 84.8 |
| chr3  | Pld1          | Exon18 | N | 27987568  | 27987681  | 1 | 47.4 | 78.3  | 42.4 | 79.6 |
| chr8  | Arhgef10      | Exon18 | N | 14974976  | 14975091  | 1 | 50.0 | 67.7  | 45.6 | 71.5 |
| chr19 | Myrf          | Exon17 | N | 10294285  | 10294361  | 1 | 51.3 | 69.8  | 47.9 | 67.6 |
| chr2  | Plcb2         | Exon17 | N | 118542948 | 118543063 | 1 | 52.4 | 73.5  | 52.8 | 68.4 |
| chr4  | Hectd3        | Exon16 | N | 116675115 | 116675244 | 1 | 25.0 | 41.4  | 26.2 | 50.0 |
| chr17 | C2            | Exon16 | N | 35018517  | 35018741  | 1 | 18.8 | 37.7  | 15.6 | 32.1 |
| chr8  | Jak3          | Exon15 | N | 74208116  | 74208267  | 1 | 41.9 | 69.9  | 44.9 | 73.6 |
| chr7  | Gpatch1       | Exon15 | N | 36092208  | 36092305  | 1 | 54.4 | 75.5  | 47.8 | 76.2 |
| chr8  | Nlrc5         | Exon15 | N | 97014230  | 97014322  | 1 | 31.8 | 54.2  | 53.2 | 80.0 |
| chr19 | Sorbs1        | Exon15 | N | 40444180  | 40444209  | 1 | 54.8 | 84.4  | 60.0 | 83.3 |
| chr13 | Mccc2         | Exon15 | N | 100770205 | 100770271 | 1 | 40.0 | 76.9  | 55.6 | 76.5 |
| chr5  | Ccdc146       | Exon15 | N | 20836358  | 20836567  | 1 | 62.3 | 78.1  | 57.6 | 74.3 |
| chr5  | Fryl          | Exon14 | N | 73448963  | 73449103  | 1 | 39.6 | 69.9  | 48.3 | 65.2 |
| chr3  | Tnni3k        | Exon14 | N | 154619904 | 154620053 | 1 | 55.0 | 82.1  | 80.0 | 95.2 |
| chr5  | Gpr133        | Exon13 | N | 129649842 | 129649983 | 1 | 46.4 | 67.1  | 40.5 | 70.9 |
| chr16 | Itsn1         | Exon13 | N | 91820924  | 91821064  | 1 | 62.5 | 85.0  | 65.1 | 90.8 |
| chr14 | Rabggta       | Exon13 | N | 56339973  | 56340097  | 1 | 39.2 | 88.2  | 52.0 | 77.5 |
| chr14 | Dock9         | Exon13 | N | 121982884 | 121983021 | 1 | 51.1 | 74.5  | 40.4 | 64.1 |
| chr17 | Tiam2         | Exon13 | N | 3454088   | 3454351   | 1 | 44.3 | 62.4  | 42.0 | 65.4 |
| chr8  | Palld         | Exon13 | N | 64181899  | 64182040  | 1 | 66.9 | 85.1  | 59.9 | 82.0 |
| chr5  | Card11        | Exon13 | N | 141366940 | 141367022 | 1 | 33.7 | 69.3  | 40.4 | 61.3 |
| chr2  | Dnm1          | Exon13 | N | 32191458  | 32191593  | 1 | 28.5 | 52.3  | 31.3 | 46.8 |
| chr2  | Stxbp1        | Exon12 | N | 32667541  | 32667625  | 1 | 40.0 | 73.1  | 42.5 | 67.8 |
| chr8  | Gse1          | Exon12 | N | 123098834 | 123099205 | 2 | 32.9 | 53.0  | 32.0 | 53.2 |
| chr9  | Cpne4         | Exon12 | N | 104922096 | 104922147 | 1 | 70.4 | 86.7  | 80.0 | 96.6 |
| chr10 | Tjp3          | Exon11 | N | 80742250  | 80742316  | 1 | 52.9 | 69.7  | 47.9 | 86.8 |
| chr2  | Stxbp1        | Exon11 | N | 32666625  | 32666755  | 1 | 59.8 | 84.9  | 59.6 | 87.1 |
| chr6  | St7           | Exon11 | N | 17856408  | 17856510  | 1 | 65.6 | 83.8  | 59.0 | 84.6 |
| chr14 | Lrch1         | Exon11 | N | 75211407  | 75211522  | 1 | 46.6 | 76.5  | 50.4 | 76.0 |
| chr4  | Plk3          | Exon11 | N | 116805510 | 116805639 | 1 | 66.7 | 88.4  | 61.4 | 84.5 |
| chr8  | Slc9a5        | Exon11 | N | 107883227 | 107883353 | 1 | 14.1 | 52.1  | 20.6 | 42.0 |
| chr11 | Slc38a10      | Exon11 | N | 119999171 | 119999295 | 1 | 33.0 | 61.1  | 35.6 | 56.7 |
| chr8  | Tacc1         | Exon11 | N | 26310563  | 26310678  | 1 | 56.5 | 74.5  | 60.9 | 81.6 |

|       |               |            |   |           |           |   |      |       |      |      |
|-------|---------------|------------|---|-----------|-----------|---|------|-------|------|------|
| chr11 | Zmynd15       | Exon11     | N | 70278609  | 70278667  | 1 | 41.8 | 82.2  | 54.5 | 74.4 |
| chr6  | Met           | Exon11     | N | 17490438  | 17490656  | 1 | 58.9 | 77.5  | 61.7 | 81.0 |
| chr2  | F2            | Exon11     | N | 91475328  | 91475352  | 1 | 76.9 | 92.3  | 78.0 | 96.2 |
| chr4  | Kif2c         | Exon11     | N | 116842690 | 116842744 | 1 | 2.8  | 40.0  | 9.0  | 26.6 |
| chr13 | Itga2         | Exon10     | N | 115646339 | 115646480 | 1 | 41.1 | 66.7  | 22.2 | 70.4 |
| chr11 | Kcnab3        | Exon10     | N | 69144764  | 69144858  | 1 | 44.6 | 73.6  | 38.6 | 70.2 |
| chr17 | Cpne5         | Exon10     | N | 29313107  | 29313148  | 1 | 27.5 | 69.1  | 33.3 | 64.9 |
| chr2  | Cry2          | Exon10     | N | 92267059  | 92267167  | 1 | 64.2 | 83.0  | 54.5 | 85.0 |
| chr4  | Whrn          | Exon10     | N | 63122316  | 63122441  | 1 | 36.3 | 54.3  | 42.6 | 69.4 |
| chr10 | Myo1a         | Exon10     | N | 127148140 | 127148226 | 1 | 55.7 | 75.9  | 53.9 | 75.8 |
| chr4  | Rap1gap       | Exon10     | N | 137273609 | 137273709 | 1 | 37.3 | 59.1  | 31.2 | 52.9 |
| chr15 | Enpp2         | Exon10     | N | 54697467  | 54697594  | 1 | 68.5 | 86.4  | 61.3 | 82.3 |
| chr7  | Dhx32         | Exon10     | N | 140951083 | 140951596 | 4 | 62.2 | 94.0  | 54.8 | 75.6 |
| chr11 | Evpl          | Exon10     | N | 116091283 | 116091437 | 1 | 47.1 | 67.4  | 44.8 | 65.1 |
| chr15 | Nrbp2         | Exon10     | N | 75920178  | 75920261  | 2 | 61.3 | 84.8  | 65.4 | 84.6 |
| chr9  | Vipr1         | Exon10     | N | 121577552 | 121577681 | 1 | 3.8  | 44.8  | 20.5 | 39.6 |
| chr11 | Wnk4          | Exon10     | N | 101130884 | 101131000 | 1 | 23.9 | 48.2  | 25.6 | 43.8 |
| chr11 | Srebf1        | Exon10     | N | 60017301  | 60017479  | 1 | 31.7 | 56.6  | 35.8 | 52.4 |
| chr4  | Plk3          | Exon10     | N | 116805332 | 116805419 | 1 | 38.2 | 62.2  | 42.1 | 57.5 |
| chr4  | Olf1339       | Downstrear | N | 118408084 | 118409083 | 5 | 61.0 | 93.2  | 25.5 | 90.5 |
| chr17 | Plin3         | Downstrear | N | 56417385  | 56418384  | 5 | 58.9 | 78.8  | 22.2 | 78.8 |
| chr12 | Gsc           | Downstrear | N | 105708419 | 105709418 | 4 | 24.0 | 71.1  | 20.3 | 70.0 |
| chr1  | Arid5a        | Downstrear | N | 36380875  | 36381874  | 5 | 56.2 | 82.3  | 41.4 | 85.3 |
| chr11 | Olf1373       | Downstrear | N | 51957095  | 51958094  | 5 | 6.7  | 46.2  | 48.7 | 92.5 |
| chr1  | 1700056E22Rik | Downstrear | N | 185855911 | 185856910 | 5 | 54.1 | 95.1  | 51.7 | 94.8 |
| chr13 | Gm5083        | Downstrear | N | 44220549  | 44221548  | 5 | 13.6 | 100.0 | 53.2 | 95.2 |
| chr7  | Ovch2         | Downstrear | N | 114924058 | 114925057 | 5 | 3.6  | 41.5  | 30.8 | 72.4 |
| chr2  | Zcchc3        | Downstrear | N | 152236692 | 152237691 | 5 | 38.3 | 71.4  | 30.3 | 71.4 |
| chr14 | Pebp4         | Downstrear | N | 70459694  | 70460693  | 5 | 70.5 | 86.4  | 44.6 | 83.9 |
| chr14 | 4931406H21Rik | Downstrear | N | 26410148  | 26411147  | 5 | 26.0 | 61.6  | 26.6 | 65.3 |
| chr18 | Pcdhga1       | Downstrear | N | 38001525  | 38002524  | 5 | 20.9 | 52.4  | 23.9 | 62.3 |
| chr18 | Pcdhga3       | Downstrear | N | 38001527  | 38002526  | 5 | 20.9 | 52.4  | 23.9 | 62.3 |
| chr18 | Pcdhga8       | Downstrear | N | 38001527  | 38002526  | 5 | 20.9 | 52.4  | 23.9 | 62.3 |
| chr18 | Pcdhga9       | Downstrear | N | 38001518  | 38002517  | 5 | 20.9 | 52.4  | 23.9 | 62.3 |
| chr18 | Pcdhgb4       | Downstrear | N | 38001525  | 38002524  | 5 | 20.9 | 52.4  | 23.9 | 62.3 |
| chr13 | Calm4         | Downstrear | N | 3837918   | 3838917   | 5 | 29.4 | 100.0 | 43.3 | 81.5 |
| chr7  | Pou2f2        | Downstrear | N | 25875134  | 25876133  | 5 | 43.3 | 67.4  | 10.1 | 47.9 |
| chr11 | Ehbp1         | Downstrear | N | 21904829  | 21905828  | 5 | 65.0 | 84.6  | 52.4 | 90.1 |
| chr14 | Clybl         | Downstrear | N | 122801457 | 122802456 | 5 | 42.5 | 64.9  | 15.7 | 52.9 |
| chr7  | Spred3        | Downstrear | N | 29942848  | 29943847  | 5 | 10.2 | 59.6  | 22.7 | 59.1 |
| chr8  | Dda1          | Downstrear | N | 74000335  | 74001334  | 1 | 36.8 | 60.0  | 28.6 | 63.3 |
| chr7  | Syt8          | Downstrear | N | 149626304 | 149627303 | 5 | 25.0 | 60.7  | 43.0 | 76.8 |
| chr16 | Gm933         | Downstrear | N | 32803974  | 32804973  | 5 | 67.6 | 92.4  | 61.3 | 94.9 |
| chr2  | 4921531C22Rik | Downstrear | N | 179713719 | 179714718 | 5 | 18.8 | 55.7  | 18.3 | 51.9 |
| chr19 | Hectd2        | Downstrear | N | 36695626  | 36696625  | 5 | 51.4 | 86.6  | 61.5 | 94.0 |
| chr3  | Foxo1         | Downstrear | N | 52154032  | 52155031  | 5 | 51.3 | 76.9  | 48.9 | 79.9 |
| chr15 | Copz1         | Downstrear | N | 103130296 | 103131295 | 3 | 41.2 | 70.9  | 34.5 | 65.3 |
| chr7  | Ras2          | Downstrear | N | 121189296 | 121190295 | 5 | 4.6  | 24.9  | 39.4 | 69.8 |
| chr19 | Lgals12       | Downstrear | N | 7670151   | 7671150   | 5 | 40.3 | 80.0  | 45.8 | 75.9 |

|       |               |            |   |           |           |   |      |      |      |       |
|-------|---------------|------------|---|-----------|-----------|---|------|------|------|-------|
| chr19 | Rcor2         | Downstrear | N | 7349716   | 7350715   | 5 | 47.9 | 68.1 | 38.3 | 68.1  |
| chr9  | Tcta          | Downstrear | N | 108204289 | 108205288 | 6 | 4.9  | 43.4 | 49.6 | 79.5  |
| chr9  | Lrrfip2       | Downstrear | N | 111128173 | 111129172 | 5 | 74.5 | 98.7 | 68.4 | 97.9  |
| chr19 | Stx5a         | Downstrear | N | 8830133   | 8831132   | 4 | 21.1 | 51.1 | 20.8 | 50.1  |
| chr14 | Ccdc25        | Downstrear | N | 66485442  | 66486441  | 5 | 50.4 | 70.1 | 52.2 | 81.1  |
| chr15 | Kifc2         | Downstrear | N | 76498627  | 76499626  | 4 | 44.4 | 74.5 | 47.6 | 75.5  |
| chr15 | Mir1943       | Downstrear | N | 79204658  | 79205657  | 5 | 59.3 | 78.7 | 53.3 | 80.8  |
| chr8  | 1810019D21Rik | Downstrear | N | 108662623 | 108663622 | 5 | 60.4 | 85.4 | 63.0 | 90.5  |
| chr4  | Fam151a       | Downstrear | N | 106420898 | 106421897 | 5 | 57.2 | 89.4 | 65.3 | 91.9  |
| chr9  | Ift46         | Downstrear | N | 44600798  | 44601797  | 5 | 65.6 | 81.2 | 50.7 | 76.4  |
| chr9  | Tmem25        | Downstrear | N | 44600862  | 44601861  | 5 | 65.6 | 81.2 | 50.7 | 76.4  |
| chr4  | Asap3         | Downstrear | N | 135802489 | 135803488 | 5 | 9.4  | 65.6 | 22.1 | 47.1  |
| chr4  | Polr1e        | Downstrear | N | 45046565  | 45047564  | 5 | 63.6 | 93.8 | 70.6 | 95.4  |
| chr4  | Fndc5         | Downstrear | N | 128821838 | 128822837 | 5 | 39.6 | 78.1 | 43.9 | 68.5  |
| chr4  | Wasf2         | Downstrear | N | 132754246 | 132755245 | 5 | 4.8  | 67.8 | 37.8 | 62.0  |
| chr14 | 1700108J01Rik | Downstrear | N | 122628127 | 122629126 | 5 | 24.9 | 75.4 | 51.1 | 74.7  |
| chr13 | Mcur1         | Downstrear | N | 43632775  | 43633774  | 5 | 57.3 | 80.7 | 53.9 | 77.3  |
| chr16 | Synj1         | Downstrear | N | 90935342  | 90936341  | 3 | 34.1 | 52.7 | 34.5 | 57.9  |
| chr2  | Atp9a         | Downstrear | N | 168458938 | 168459937 | 5 | 36.5 | 67.7 | 42.8 | 66.0  |
| chr10 | Smarcc2       | Downstrear | N | 127927231 | 127928230 | 6 | 39.6 | 59.4 | 41.4 | 64.5  |
| chr3  | Adad1         | Downstrear | N | 37010435  | 37011434  | 5 | 66.7 | 82.9 | 61.9 | 84.8  |
| chr1  | Pou2f1        | Downstrear | N | 167794285 | 167795284 | 5 | 25.8 | 68.6 | 59.4 | 82.2  |
| chr7  | Rgs9bp        | Downstrear | N | 36363013  | 36364012  | 5 | 24.0 | 82.3 | 68.4 | 90.8  |
| chr2  | Zfp663        | Downstrear | N | 165175797 | 165176796 | 5 | 51.6 | 75.2 | 57.8 | 80.2  |
| chr2  | Bmi1          | Downstrear | N | 18608257  | 18609256  | 5 | 58.5 | 88.7 | 69.5 | 91.9  |
| chr4  | Camk2n1       | Downstrear | N | 138016042 | 138017041 | 5 | 55.5 | 70.8 | 53.4 | 75.7  |
| chr1  | Pecr          | Downstrear | N | 72304747  | 72305746  | 5 | 66.7 | 90.2 | 25.4 | 47.6  |
| chr2  | Myo3a         | Downstrear | N | 22473773  | 22474772  | 5 | 22.8 | 70.7 | 21.6 | 43.6  |
| chr15 | Dpys          | Downstrear | N | 39599031  | 39600030  | 5 | 47.7 | 81.8 | 58.5 | 80.6  |
| chr7  | Sae1          | Downstrear | N | 16911403  | 16912402  | 5 | 22.5 | 45.2 | 35.6 | 57.6  |
| chr3  | Lrrc40        | Downstrear | N | 157731443 | 157732442 | 5 | 21.7 | 51.0 | 28.0 | 50.0  |
| chr5  | Oas1d         | Downstrear | N | 121371657 | 121372656 | 5 | 22.7 | 38.5 | 16.7 | 38.5  |
| chr3  | Ints3         | Downstrear | N | 90194302  | 90195301  | 4 | 42.7 | 57.9 | 41.4 | 63.1  |
| chr4  | Tnfsf8        | Downstrear | N | 63492858  | 63493857  | 5 | 50.0 | 89.2 | 63.3 | 84.8  |
| chr8  | Snord71       | Downstrear | N | 112363276 | 112364275 | 5 | 64.1 | 94.2 | 67.8 | 89.1  |
| chr11 | Dcakd         | Downstrear | N | 102854370 | 102855369 | 5 | 44.6 | 90.0 | 51.8 | 73.0  |
| chr11 | 2310047M10Rik | Downstrear | N | 68875079  | 68876078  | 5 | 27.3 | 48.5 | 21.2 | 42.1  |
| chr18 | 8430422H06Rik | Downstrear | N | 14437052  | 14438051  | 5 | 60.0 | 86.2 | 79.3 | 100.0 |
| chr11 | Gm11563       | Downstrear | N | 99518256  | 99519255  | 5 | 46.8 | 64.6 | 68.5 | 89.1  |
| chr7  | Lgi4          | Downstrear | N | 31855955  | 31856954  | 5 | 58.8 | 90.2 | 47.1 | 67.6  |
| chr15 | Foxh1         | Downstrear | N | 76497654  | 76498653  | 5 | 50.3 | 77.6 | 51.5 | 71.8  |
| chr6  | Tuba3a        | Downstrear | N | 125227292 | 125228291 | 5 | 58.3 | 92.5 | 75.8 | 95.9  |
| chr7  | Mir675        | Downstrear | N | 149761969 | 149762968 | 5 | 52.2 | 73.6 | 48.6 | 68.7  |
| chr17 | Hsf2bp        | Downstrear | N | 32080714  | 32081713  | 5 | 63.7 | 85.7 | 56.0 | 76.0  |
| chr4  | E330017L17Rik | Downstrear | N | 129586241 | 129587240 | 5 | 29.9 | 58.6 | 34.4 | 54.4  |
| chr5  | D5Ert605e     | Downstrear | N | 148234621 | 148235620 | 5 | 4.5  | 51.2 | 24.8 | 44.8  |
| chr10 | Arid3a        | Downstrear | N | 79417758  | 79418757  | 5 | 58.2 | 86.2 | 63.4 | 83.2  |
| chr9  | Tln2          | Downstrear | N | 67063892  | 67064891  | 5 | 51.1 | 80.6 | 50.1 | 70.0  |
| chr10 | Taar8c        | Downstrear | N | 23819649  | 23820648  | 5 | 58.9 | 74.8 | 74.4 | 94.2  |

|       |               |            |   |           |           |   |      |       |      |      |
|-------|---------------|------------|---|-----------|-----------|---|------|-------|------|------|
| chr4  | 1700013G24Rik | Downstrear | N | 137011377 | 137012376 | 5 | 65.6 | 82.3  | 61.1 | 80.8 |
| chr3  | 4930442L01Rik | Downstrear | N | 96632749  | 96633748  | 5 | 61.8 | 79.8  | 55.9 | 75.6 |
| chr8  | Rbl2          | Downstrear | N | 93647744  | 93648743  | 5 | 62.4 | 78.3  | 60.2 | 79.8 |
| chr15 | Ank           | Downstrear | N | 27524663  | 27525662  | 5 | 38.0 | 65.1  | 51.9 | 71.6 |
| chr19 | Ccdc86        | Downstrear | N | 11014971  | 11015970  | 1 | 56.5 | 73.5  | 44.4 | 63.6 |
| chr5  | 4933426D04Rik | Downstrear | N | 24412668  | 24413667  | 4 | 2.7  | 55.3  | 76.3 | 95.5 |
| chr17 | Ergic1        | Downstrear | N | 26793879  | 26794878  | 5 | 71.0 | 90.8  | 68.4 | 87.5 |
| chr7  | Fut2          | Downstrear | N | 52902961  | 52903960  | 5 | 63.6 | 82.2  | 68.2 | 87.0 |
| chr13 | Hist1h3d      | Downstrear | N | 23668082  | 23669081  | 5 | 31.6 | 55.3  | 11.4 | 30.2 |
| chr7  | Zfp580        | Downstrear | N | 5005326   | 5006325   | 3 | 49.0 | 72.1  | 28.4 | 46.9 |
| chr4  | Triqk         | Downstrear | N | 12908633  | 12909632  | 3 | 80.5 | 97.8  | 68.6 | 87.0 |
| chr2  | Gm5535        | Downstrear | N | 143997886 | 143998885 | 5 | 21.4 | 36.5  | 21.2 | 39.4 |
| chr6  | 2700086A05Rik | Downstrear | N | 52163597  | 52164596  | 6 | 16.9 | 56.8  | 11.6 | 29.7 |
| chr6  | Mira          | Downstrear | N | 52163490  | 52164489  | 6 | 16.9 | 56.8  | 11.6 | 29.7 |
| chr9  | Ccr8          | Downstrear | N | 120004025 | 120005024 | 5 | 45.2 | 61.3  | 51.3 | 69.2 |
| chr19 | 9130011E15Rik | Downstrear | N | 45891634  | 45892633  | 5 | 55.3 | 75.9  | 62.6 | 80.4 |
| chr7  | Mrgpra1       | Downstrear | N | 54589245  | 54590244  | 4 | 59.5 | 78.3  | 29.4 | 47.2 |
| chr15 | Ddx17         | Downstrear | N | 79357126  | 79358125  | 5 | 50.0 | 75.0  | 56.0 | 73.8 |
| chr17 | Gpr116        | Downstrear | N | 43596507  | 43597506  | 5 | 56.1 | 86.2  | 67.5 | 85.2 |
| chr13 | 1110046J04Rik | Downstrear | N | 34052051  | 34053050  | 4 | 60.0 | 85.7  | 73.0 | 90.5 |
| chr12 | Mir1188       | Downstrear | N | 110850152 | 110851151 | 6 | 53.4 | 70.3  | 48.6 | 66.1 |
| chr18 | Camk2a        | Downstrear | N | 61147807  | 61148806  | 5 | 14.3 | 90.3  | 58.1 | 75.5 |
| chr13 | Hist1h2an     | Downstrear | N | 21877695  | 21878694  | 5 | 3.0  | 18.9  | 6.7  | 24.0 |
| chr5  | Fam185a       | Downstrear | N | 20987943  | 20988942  | 5 | 38.7 | 61.2  | 48.9 | 66.1 |
| chr2  | Foxa2         | Downstrear | N | 147867614 | 147868613 | 5 | 23.6 | 80.5  | 29.5 | 46.5 |
| chr7  | Rpl13a        | Downstrear | N | 52379933  | 52380932  | 3 | 8.0  | 28.7  | 17.1 | 34.0 |
| chr2  | Itpka         | Downstrear | N | 119576990 | 119577989 | 6 | 68.8 | 86.2  | 71.0 | 87.8 |
| chr17 | Slc25a41      | Downstrear | N | 57171195  | 57172194  | 2 | 50.9 | 66.9  | 51.2 | 67.8 |
| chr10 | 4930404N11Rik | Downstrear | N | 80825769  | 80826768  | 4 | 35.7 | 55.0  | 34.2 | 50.8 |
| chr6  | Mlf2          | Downstrear | N | 124886168 | 124887167 | 5 | 81.7 | 97.0  | 81.0 | 97.6 |
| chr8  | Dusp26        | Downstrear | N | 32207520  | 32208519  | 5 | 42.0 | 77.7  | 39.7 | 56.1 |
| chr9  | Acvr2b        | Downstrear | N | 119342625 | 119343624 | 5 | 47.0 | 72.2  | 46.6 | 62.9 |
| chr6  | Mir680-1      | Downstrear | N | 129641662 | 129642661 | 5 | 71.4 | 87.2  | 59.4 | 75.7 |
| chr5  | Otof          | Downstrear | N | 30668351  | 30669350  | 5 | 41.2 | 61.1  | 39.0 | 55.1 |
| chr2  | Mir219-2      | Downstrear | N | 29700151  | 29701150  | 3 | 60.7 | 84.1  | 62.7 | 78.9 |
| chr2  | Urm1          | Downstrear | N | 29700517  | 29701516  | 2 | 60.7 | 84.1  | 62.7 | 78.9 |
| chr1  | Esrrg         | Downstrear | N | 190038764 | 190039763 | 5 | 60.8 | 78.3  | 62.3 | 78.5 |
| chr3  | Fbxw7         | Downstrear | N | 84783121  | 84784120  | 5 | 73.5 | 100.0 | 67.2 | 83.2 |
| chr7  | Chst8         | Downstrear | N | 35458487  | 35459486  | 5 | 44.7 | 76.0  | 49.3 | 65.2 |
| chr16 | Hira          | Downstrear | N | 18970402  | 18971401  | 5 | 12.7 | 43.7  | 18.7 | 34.6 |
| chr10 | Ndufa4l2      | Downstrear | N | 126954211 | 126955210 | 5 | 40.2 | 81.1  | 59.8 | 75.5 |
| chr10 | A130077B15Rik | Downstrear | N | 122001079 | 122002078 | 5 | 70.9 | 89.2  | 71.1 | 86.7 |
| chr7  | Xrra1         | Downstrear | N | 107066335 | 107067334 | 4 | 68.7 | 84.1  | 69.9 | 85.5 |
| chr2  | Lhx3          | Downstrear | N | 26054732  | 26055731  | 5 | 21.2 | 42.5  | 27.6 | 43.2 |
| chr4  | Zdhhc18       | Downstrear | N | 133161907 | 133162906 | 5 | 58.8 | 87.5  | 76.4 | 91.8 |
| chr15 | Peg13         | Downstrear | N | 72635030  | 72636029  | 5 | 54.7 | 80.6  | 64.4 | 79.6 |
| chr2  | Zcchc3        | 3-UTR      | N | 152237692 | 152239310 | 8 | 13.2 | 57.2  | 15.4 | 60.0 |
| chr1  | Dtl           | 3-UTR      | N | 193361244 | 193363121 | 9 | 29.0 | 45.0  | 39.5 | 83.2 |
| chr2  | Myo3a         | 3-UTR      | N | 22473690  | 22473772  | 1 | 17.1 | 46.8  | 13.2 | 56.3 |



|       |               |             |   |           |           |    |      |       |      |      |
|-------|---------------|-------------|---|-----------|-----------|----|------|-------|------|------|
| chr2  | Pd hx         | 3-UTR       | N | 102861213 | 102862167 | 5  | 54.4 | 79.7  | 39.3 | 79.5 |
| chr19 | Rab3il1       | 3-UTR       | N | 10109030  | 10110076  | 5  | 9.1  | 62.9  | 55.9 | 94.7 |
| chr14 | Slitrk5       | 3-UTR       | N | 112081042 | 112082357 | 7  | 30.5 | 51.0  | 2.5  | 40.2 |
| chr16 |               | 5-Sep 3-UTR | N | 18621904  | 18622832  | 3  | 66.3 | 85.5  | 49.7 | 87.3 |
| chr11 | Cd7           | 3-UTR       | N | 120898063 | 120898356 | 1  | 49.0 | 76.7  | 36.1 | 72.9 |
| chr14 | Amer2         | 3-UTR       | N | 60999103  | 60999840  | 4  | 38.2 | 74.7  | 44.8 | 80.4 |
| chr3  | Mab21l2       | 3-UTR       | N | 86349503  | 86350533  | 4  | 43.0 | 79.3  | 45.7 | 79.2 |
| chr11 | Vat1          | 3-UTR       | N | 101320062 | 101321506 | 7  | 33.5 | 57.2  | 33.2 | 65.4 |
| chr9  | Lars2         | 3-UTR       | N | 123370797 | 123371782 | 3  | 20.3 | 51.8  | 25.6 | 57.6 |
| chr5  | Drc1          | 3-UTR       | N | 30668834  | 30668993  | 2  | 20.0 | 48.2  | 22.9 | 54.6 |
| chr4  | Cdkn2b        | 3-UTR       | N | 88952198  | 88952962  | 3  | 49.2 | 92.5  | 54.1 | 85.6 |
| chr7  | Fzd4          | 3-UTR       | N | 96556871  | 96558620  | 9  | 60.6 | 92.0  | 45.7 | 76.2 |
| chr11 | Dusp14        | 3-UTR       | N | 83861547  | 83862118  | 3  | 20.0 | 81.3  | 29.2 | 59.4 |
| chr1  | Fzd5          | 3-UTR       | N | 64777132  | 64781416  | 21 | 37.4 | 58.1  | 28.9 | 58.5 |
| chr2  | Sp5           | 3-UTR       | N | 70315227  | 70315783  | 1  | 24.0 | 69.7  | 19.5 | 48.9 |
| chr11 | Arl5c         | 3-UTR       | N | 97850894  | 97851604  | 4  | 20.8 | 41.8  | 20.8 | 50.0 |
| chr3  | Slc50a1       | 3-UTR       | N | 89072168  | 89072418  | 1  | 63.8 | 86.7  | 42.9 | 72.0 |
| chr5  | Card11        | 3-UTR       | N | 141348953 | 141349278 | 1  | 22.9 | 59.8  | 30.1 | 59.1 |
| chr18 | Dsc3          | 3-UTR       | N | 20119431  | 20121872  | 12 | 57.6 | 91.7  | 62.5 | 90.7 |
| chr19 | Mark2         | 3-UTR       | N | 7349886   | 7351579   | 8  | 63.1 | 78.3  | 55.6 | 83.6 |
| chr4  | Kif12         | 3-UTR       | N | 62826671  | 62826865  | 1  | 40.0 | 55.4  | 44.3 | 71.8 |
| chr3  | Dkk2          | 3-UTR       | N | 131841085 | 131843268 | 11 | 72.3 | 100.0 | 71.3 | 98.5 |
| chr2  | Hoxd8         | 3-UTR       | N | 74544870  | 74545364  | 2  | 41.9 | 72.9  | 30.8 | 57.9 |
| chr11 | Wbp2          | 3-UTR       | N | 115939887 | 115940856 | 5  | 62.2 | 86.9  | 58.6 | 84.1 |
| chr18 | Wnt8a         | 3-UTR       | N | 34707303  | 34707715  | 2  | 57.8 | 90.0  | 57.6 | 82.9 |
| chr14 | Gm16617       | 3-UTR       | N | 52606064  | 52606514  | 2  | 44.1 | 91.9  | 69.2 | 94.0 |
| chr3  | Actrt3        | 3-UTR       | N | 30495995  | 30496755  | 4  | 50.6 | 71.7  | 37.4 | 62.1 |
| chr11 | Cygb          | 3-UTR       | N | 116506909 | 116508272 | 7  | 43.4 | 68.6  | 58.8 | 83.4 |
| chr10 | Gpr182        | 3-UTR       | N | 127186658 | 127186939 | 1  | 29.2 | 57.3  | 29.0 | 52.8 |
| chr1  | 2010300C02Rik | 3-UTR       | N | 37668521  | 37669101  | 3  | 13.4 | 52.1  | 30.4 | 53.7 |
| chr17 | Rnf151        | 3-UTR       | N | 24852785  | 24853180  | 2  | 45.9 | 71.9  | 43.8 | 66.7 |
| chr11 | Zfp735        | 3-UTR       | N | 73525939  | 73527310  | 5  | 48.7 | 66.7  | 34.6 | 57.1 |
| chr9  | Dnm2          | 3-UTR       | N | 21311907  | 21312203  | 2  | 21.6 | 43.2  | 24.5 | 47.0 |
| chr9  | Mmp13         | 3-UTR       | N | 7282119   | 7283333   | 6  | 75.6 | 91.9  | 73.9 | 96.2 |
| chr11 | Rhbdd3        | 3-UTR       | N | 5005981   | 5006094   | 2  | 66.7 | 92.3  | 73.7 | 95.9 |
| chr8  | Hpgd          | 3-UTR       | N | 58799003  | 58799843  | 4  | 65.5 | 84.6  | 58.3 | 80.5 |
| chr17 | Cd2ap         | 3-UTR       | N | 42929900  | 42933276  | 15 | 65.0 | 88.0  | 64.9 | 87.0 |
| chr11 | Sowaha        | 3-UTR       | N | 53290080  | 53291762  | 8  | 40.0 | 88.8  | 63.4 | 85.0 |
| chr14 | Dhrs4         | 3-UTR       | N | 56108771  | 56109177  | 2  | 61.9 | 80.1  | 61.2 | 82.6 |
| chr10 | Shmt2         | 3-UTR       | N | 126954179 | 126954844 | 5  | 40.2 | 76.6  | 50.3 | 70.8 |
| chr2  | Foxa2         | 3-UTR       | N | 147868614 | 147869249 | 3  | 30.4 | 84.3  | 29.7 | 50.0 |
| chr7  | Tmc7          | 3-UTR       | N | 125679358 | 125681650 | 11 | 41.2 | 62.5  | 70.3 | 90.6 |
| chr7  | 1600016N20Rik | 3-UTR       | N | 148395942 | 148395971 | 2  | 71.5 | 87.4  | 71.3 | 91.3 |
| chr7  | Msx3          | 3-UTR       | N | 147232056 | 147233638 | 7  | 58.8 | 75.5  | 50.3 | 70.0 |
| chr11 | Kdm6b         | 3-UTR       | N | 69212020  | 69213327  | 5  | 33.3 | 60.3  | 42.5 | 62.2 |
| chr5  | Tbx3          | 3-UTR       | N | 120133102 | 120134610 | 8  | 56.3 | 75.4  | 35.6 | 55.2 |
| chr11 | Peli1         | 3-UTR       | N | 21048527  | 21050330  | 7  | 45.7 | 64.4  | 40.3 | 59.8 |
| chr19 | Arl3          | 3-UTR       | N | 46605599  | 46605828  | 1  | 54.2 | 79.3  | 59.2 | 78.7 |
| chr15 | Kifc2         | 3-UTR       | N | 76497889  | 76498626  | 4  | 55.1 | 77.6  | 57.0 | 76.2 |

|       |               |       |   |           |           |    |      |      |      |      |
|-------|---------------|-------|---|-----------|-----------|----|------|------|------|------|
| chr19 | Mpeg1         | 3-UTR | N | 12537833  | 12539775  | 10 | 9.2  | 30.8 | 28.2 | 47.2 |
| chr15 | Mkl1          | 3-UTR | N | 80842711  | 80843714  | 6  | 71.2 | 92.3 | 75.4 | 94.4 |
| chr7  | Rpl13a        | 3-UTR | N | 52380933  | 52381315  | 3  | 25.4 | 44.8 | 22.3 | 40.9 |
| chr1  | Arl4c         | 3-UTR | N | 90594801  | 90597660  | 12 | 26.8 | 47.3 | 28.3 | 46.6 |
| chr4  | Cga           | 3-UTR | N | 34854393  | 34854623  | 1  | 62.9 | 88.3 | 66.0 | 84.3 |
| chr13 | Foxq1         | 3-UTR | N | 31651989  | 31652843  | 3  | 24.4 | 42.3 | 22.0 | 40.0 |
| chr2  | BC052040      | 3-UTR | N | 115602768 | 115604504 | 9  | 45.6 | 96.3 | 53.1 | 70.9 |
| chr9  | Chrna3        | 3-UTR | N | 54859150  | 54860607  | 7  | 61.5 | 86.7 | 65.3 | 83.1 |
| chr3  | Pias3         | 3-UTR | N | 96509039  | 96509993  | 5  | 58.1 | 78.3 | 59.9 | 77.4 |
| chr13 | Tnpo1         | 3-UTR | N | 99612036  | 99616410  | 22 | 76.2 | 92.7 | 74.2 | 91.7 |
| chr15 | Cyp2d13       | 3-UTR | N | 82467180  | 82467428  | 1  | 46.4 | 62.4 | 45.4 | 62.9 |
| chr19 | Klc2          | 3-UTR | N | 5107746   | 5108604   | 4  | 13.5 | 31.7 | 41.0 | 58.1 |
| chr17 | Pkmyt1        | 3-UTR | N | 23873574  | 23873696  | 1  | 68.1 | 85.9 | 68.2 | 84.9 |
| chr1  | Fcer1g        | 3-UTR | N | 173159703 | 173159995 | 1  | 44.0 | 60.5 | 45.2 | 61.6 |
| chr18 | Spire1        | 3-UTR | N | 67647863  | 67650944  | 15 | 60.4 | 77.4 | 69.5 | 85.6 |
| chr9  | Fut4          | 3-UTR | N | 14552903  | 14555138  | 11 | 64.8 | 81.0 | 61.8 | 77.9 |
| chr9  | 1600029D21Rik | 3-UTR | N | 50312651  | 50313744  | 7  | 39.0 | 55.9 | 39.3 | 55.4 |
| chr11 | Ace           | 3-UTR | N | 105850349 | 105851278 | 4  | 36.7 | 58.1 | 36.4 | 52.4 |
| chr8  | Mcm5          | 3-UTR | N | 77651224  | 77652338  | 6  | 67.4 | 95.3 | 69.4 | 85.1 |
| chr10 | Ado           | 3-UTR | N | 67007259  | 67010750  | 16 | 58.1 | 80.5 | 59.7 | 75.2 |
| chr6  | Creb3l2       | 3-UTR | N | 37281021  | 37282424  | 7  | 76.9 | 92.0 | 69.0 | 84.5 |
| chr11 | Bcas3         | 3-UTR | N | 85638853  | 85639560  | 4  | 65.0 | 90.3 | 64.6 | 80.1 |
| chr8  | Ccl17         | 3-UTR | N | 97335754  | 97335936  | 1  | 64.5 | 80.6 | 67.0 | 82.4 |
| chr7  | Arnt2         | 3-UTR | N | 91394785  | 91398565  | 19 | 43.3 | 76.9 | 48.9 | 64.2 |
| chr5  | Fzd1          | 3-UTR | N | 4753839   | 4755651   | 9  | 29.1 | 58.3 | 74.6 | 89.9 |
| chr4  | Pgd           | 3-UTR | N | 148524094 | 148524752 | 3  | 45.0 | 73.1 | 59.1 | 74.3 |
| chr17 | 2300002M23Rik | 3-UTR | N | 35705762  | 35705890  | 1  | 13.2 | 36.9 | 18.0 | 33.1 |
| chr14 | Dok2          | 3-UTR | N | 71177881  | 71178301  | 2  | 41.4 | 64.6 | 32.2 | 47.3 |
| chr15 | Fzd6          | 3-UTR | N | 38868101  | 38869736  | 8  | 60.8 | 96.9 | 66.1 | 81.1 |

**Group 7-mDMR genes associated with methylation loss at 5' non-CGI**

| Chr   | Gene     | Region | CGI | Start     | End       | #Bins | DNA Methylation Level (%) |      |             |      |
|-------|----------|--------|-----|-----------|-----------|-------|---------------------------|------|-------------|------|
|       |          |        |     |           |           |       | ISCs                      |      | Diff. Cells |      |
|       |          |        |     |           |           |       | P0                        | P21  | P0          | P21  |
| chr4  | Al427809 | 5-UTR  | N   | 53282951  | 53283104  | 1     | 60.8                      | 10.5 | 85.1        | 0.0  |
| chr5  | Trafd1   | 5-UTR  | N   | 121834096 | 121835624 | 4     | 78.7                      | 38.9 | 73.0        | 2.5  |
| chr5  | Pf4      | 5-UTR  | N   | 91201461  | 91201607  | 1     | 62.1                      | 12.6 | 79.0        | 8.6  |
| chr10 | Vnn3     | 5-UTR  | N   | 23571268  | 23571389  | 1     | 80.2                      | 0.0  | 67.7        | 0.6  |
| chr17 | Xdh      | 5-UTR  | N   | 74299469  | 74299522  | 1     | 73.1                      | 0.6  | 50.5        | 0.0  |
| chr9  | Casp1    | 5-UTR  | N   | 5298517   | 5298716   | 1     | 56.2                      | 3.1  | 48.2        | 0.8  |
| chr7  | Tmem150b | 5-UTR  | N   | 4676578   | 4676853   | 2     | 40.3                      | 3.1  | 48.5        | 1.7  |
| chr2  | Znf512b  | 5-UTR  | N   | 181325689 | 181327166 | 5     | 95.0                      | 6.5  | 46.5        | 0.9  |
| chr5  | Azgp1    | 5-UTR  | N   | 138422749 | 138422787 | 1     | 38.1                      | 0.0  | 48.7        | 4.7  |
| chr14 | Mtrf1    | 5-UTR  | N   | 79797579  | 79801236  | 17    | 63.4                      | 44.8 | 89.6        | 46.0 |
| chr6  | Tmem106b | 5-UTR  | N   | 13019759  | 13021743  | 7     | 96.0                      | 47.9 | 58.3        | 14.8 |
| chr1  | Aox3     | 5-UTR  | N   | 58169980  | 58170102  | 1     | 54.2                      | 31.1 | 48.9        | 7.3  |
| chr7  | Ptprh    | 5-UTR  | N   | 4554701   | 4555643   | 5     | 67.4                      | 45.8 | 73.1        | 32.3 |
| chr8  | Irf8     | 5-UTR  | N   | 123260276 | 123263717 | 15    | 52.5                      | 21.6 | 55.5        | 15.1 |
| chr13 | F13a1    | 5-UTR  | N   | 37139356  | 37142113  | 15    | 75.1                      | 56.3 | 91.2        | 51.2 |

|       |               |       |   |           |           |     |      |      |      |      |
|-------|---------------|-------|---|-----------|-----------|-----|------|------|------|------|
| chr17 | C030013G03Rik | 5-UTR | N | 12659710  | 12659888  | 1   | 65.2 | 20.8 | 53.1 | 13.6 |
| chr18 | 4930592I03Rik | 5-UTR | N | 83089911  | 83089952  | 1   | 82.3 | 48.4 | 80.2 | 40.8 |
| chr1  | Pigr          | 5-UTR | N | 132723261 | 132731005 | 39  | 57.3 | 19.0 | 60.4 | 21.0 |
| chr16 | Gm10791       | 5-UTR | N | 84972456  | 84972997  | 3   | 65.1 | 30.3 | 80.5 | 41.5 |
| chr10 | Rdh9          | 5-UTR | N | 127213461 | 127213540 | 1   | 81.5 | 14.7 | 76.3 | 40.0 |
| chr14 | Phf11d        | 5-UTR | N | 59984247  | 59984327  | 1   | 72.7 | 50.5 | 89.2 | 52.9 |
| chr1  | Kcnj13        | 5-UTR | N | 89285965  | 89291304  | 27  | 74.4 | 26.0 | 77.5 | 41.4 |
| chr9  | Nr2e3         | 5-UTR | N | 59797692  | 59797886  | 1   | 89.4 | 40.6 | 78.8 | 43.1 |
| chr8  | Ces2g         | 5-UTR | N | 107485618 | 107485687 | 1   | 35.6 | 0.0  | 36.2 | 0.7  |
| chr17 | Slc22a1       | 5-UTR | N | 12868526  | 12868704  | 1   | 23.4 | 0.9  | 35.5 | 0.5  |
| chr4  | Cyp4b1        | 5-UTR | N | 115320293 | 115320310 | 1   | 33.3 | 3.8  | 34.8 | 0.0  |
| chr16 | Mir802        | 5-UTR | N | 93369965  | 93370061  | 1   | 57.1 | 21.4 | 68.5 | 34.2 |
| chr1  | Aqp12         | 5-UTR | N | 94902911  | 94902979  | 1   | 30.4 | 10.0 | 44.9 | 11.4 |
| chr6  | Tigd2         | 5-UTR | N | 59158864  | 59160143  | 3   | 48.3 | 22.8 | 50.9 | 17.4 |
| chr19 | 5830416P10Rik | 5-UTR | N | 53539176  | 53539286  | 1   | 80.5 | 36.0 | 77.8 | 44.3 |
| chr9  | Mir3109       | 5-UTR | N | 69304751  | 69304838  | 1   | 44.2 | 14.3 | 50.8 | 18.3 |
| chr15 | Vdr           | 5-UTR | N | 97715371  | 97738727  | 113 | 75.6 | 43.2 | 73.4 | 41.2 |
| chr19 | Tmem216       | 5-UTR | N | 10629065  | 10630728  | 5   | 32.7 | 1.1  | 30.7 | 0.0  |
| chr4  | Pdik1l        | 5-UTR | N | 133840446 | 133843761 | 9   | 41.9 | 23.4 | 55.1 | 24.5 |
| chr9  | Spa17         | 5-UTR | N | 37419575  | 37421305  | 6   | 91.2 | 48.4 | 87.4 | 58.2 |
| chr9  | Ubl7          | 5-UTR | N | 57758793  | 57760473  | 7   | 81.4 | 64.6 | 68.2 | 39.3 |
| chr7  | Gm10619       | 5-UTR | N | 80960823  | 80961389  | 3   | 82.7 | 61.1 | 85.5 | 57.6 |
| chr1  | Abca12        | 5-UTR | N | 71461157  | 71461484  | 2   | 52.9 | 21.8 | 85.9 | 58.1 |
| chr17 | 2010106C02Rik | 5-UTR | N | 86686241  | 86686518  | 1   | 29.8 | 1.7  | 29.3 | 1.6  |
| chr11 | Cant1         | 5-UTR | N | 118272804 | 118280432 | 35  | 61.9 | 22.5 | 54.6 | 27.1 |
| chr1  | Slc9a4        | 5-UTR | N | 40637072  | 40637360  | 1   | 17.0 | 1.0  | 30.3 | 3.0  |
| chr12 | Zfyve1        | 5-UTR | N | 84935831  | 84938097  | 9   | 60.0 | 43.8 | 66.6 | 39.7 |
| chr2  | Myh7b         | 5-UTR | N | 155436979 | 155437393 | 2   | 82.5 | 56.6 | 80.5 | 53.7 |
| chr8  | Tnfsf13b      | 5-UTR | N | 10006633  | 10006842  | 1   | 47.2 | 10.0 | 53.7 | 27.1 |
| chr11 | Rnft1         | 5-UTR | N | 86298159  | 86299613  | 4   | 48.8 | 28.5 | 34.4 | 8.3  |
| chr14 | Acox2         | 5-UTR | N | 9089376   | 9091533   | 11  | 38.4 | 11.7 | 42.6 | 16.7 |
| chr10 | Adat3         | 5-UTR | N | 80065625  | 80069074  | 14  | 49.8 | 15.1 | 57.3 | 31.7 |
| chr2  | Defb29        | 5-UTR | N | 152365747 | 152365777 | 1   | 63.6 | 44.4 | 69.3 | 43.9 |
| chr8  | Trappc11      | 5-UTR | N | 48616210  | 48618824  | 11  | 62.8 | 37.5 | 40.6 | 15.6 |
| chr7  | Il18bp        | 5-UTR | N | 109165829 | 109166669 | 4   | 64.2 | 35.5 | 54.5 | 29.6 |
| chr18 | Sh3rf2        | 5-UTR | N | 42213364  | 42213471  | 1   | 25.5 | 7.3  | 24.6 | 0.0  |
| chr18 | Gm9926        | 5-UTR | N | 66663832  | 66664116  | 1   | 46.3 | 22.2 | 38.8 | 14.2 |
| chr17 | Wash          | 5-UTR | N | 66460886  | 66463207  | 9   | 75.9 | 57.4 | 90.6 | 66.3 |
| chr13 | Cenpk         | 5-UTR | N | 105018691 | 105020842 | 6   | 31.4 | 8.3  | 31.8 | 7.7  |
| chr7  | BC051019      | 5-UTR | N | 116866800 | 116867285 | 2   | 77.9 | 62.2 | 62.4 | 38.5 |
| chr7  | Oat           | 5-UTR | N | 139761788 | 139768081 | 27  | 75.7 | 25.2 | 58.3 | 34.6 |
| chr6  | Rep15         | 5-UTR | N | 146981059 | 146981186 | 1   | 68.7 | 37.6 | 50.9 | 27.2 |
| chr11 | Scgb3a1       | 5-UTR | N | 49477097  | 49477162  | 1   | 40.0 | 9.1  | 30.3 | 6.7  |
| chr18 | Zfp191        | 5-UTR | N | 24176589  | 24179272  | 10  | 17.2 | 2.1  | 26.1 | 2.5  |
| chr17 | Btnl5         | 5-UTR | N | 34634008  | 34634374  | 2   | 73.6 | 12.3 | 51.4 | 27.8 |
| chr4  | Stmn1         | 5-UTR | N | 134024235 | 134026077 | 3   | 56.1 | 14.6 | 40.3 | 17.0 |
| chr4  | AU040320      | 5-UTR | N | 126430799 | 126434170 | 13  | 51.9 | 34.8 | 46.0 | 23.2 |
| chr1  | Ivns1abp      | 5-UTR | N | 153191628 | 153198128 | 25  | 51.8 | 24.7 | 43.5 | 20.7 |
| chr16 | Tmprss2       | 5-UTR | N | 97820877  | 97832802  | 55  | 53.6 | 36.6 | 50.5 | 27.8 |

|       |               |       |   |           |           |     |      |      |      |      |
|-------|---------------|-------|---|-----------|-----------|-----|------|------|------|------|
| chr19 | Aldh18a1      | 5-UTR | N | 40660068  | 40662953  | 11  | 59.8 | 41.8 | 72.4 | 50.0 |
| chr2  | 4930547E08Rik | 5-UTR | N | 103650630 | 103650779 | 1   | 63.6 | 30.1 | 62.1 | 39.8 |
| chr10 | Tmcc3         | 5-UTR | N | 94038002  | 94041182  | 17  | 64.3 | 21.3 | 50.3 | 28.2 |
| chr4  | Sdr16c5       | 5-UTR | N | 3943572   | 3946810   | 16  | 64.8 | 49.1 | 55.4 | 33.6 |
| chr14 | Rnase1        | 5-UTR | N | 51765571  | 51766442  | 4   | 73.1 | 25.7 | 88.1 | 66.4 |
| chr7  | Arfp2         | 5-UTR | N | 112787938 | 112788930 | 3   | 30.2 | 0.0  | 37.9 | 16.7 |
| chr15 | Gm15941       | 5-UTR | N | 37362169  | 37362419  | 2   | 83.1 | 35.7 | 52.5 | 31.4 |
| chr11 | Il4           | 5-UTR | N | 53432109  | 53432167  | 1   | 64.5 | 40.6 | 67.0 | 46.1 |
| chr4  | Aldh1b1       | 5-UTR | N | 45811894  | 45815335  | 15  | 33.8 | 6.7  | 32.3 | 11.5 |
| chr11 | Tbrg4         | 5-UTR | N | 6524224   | 6526070   | 7   | 42.4 | 19.6 | 47.2 | 26.5 |
| chr5  | Hps4          | 5-UTR | N | 112772115 | 112774027 | 7   | 43.8 | 8.7  | 37.3 | 16.8 |
| chr13 | Mterfd1       | 5-UTR | N | 67031140  | 67034008  | 12  | 90.1 | 61.9 | 91.2 | 70.8 |
| chr5  | Sult1d1       | 5-UTR | N | 87995209  | 87998031  | 13  | 60.6 | 25.0 | 41.0 | 20.7 |
| chr6  | Tmem52b       | 5-UTR | N | 129462575 | 129463056 | 2   | 52.3 | 36.4 | 65.4 | 45.4 |
| chr4  | Mir200a       | 5-UTR | N | 155429005 | 155429094 | 1   | 24.5 | 0.7  | 20.7 | 0.7  |
| chr2  | Oser1         | 5-UTR | N | 163241348 | 163245206 | 16  | 48.6 | 31.1 | 54.0 | 34.7 |
| chr7  | Cln3          | 5-UTR | N | 133726560 | 133727794 | 3   | 36.5 | 21.4 | 35.8 | 16.7 |
| chr6  | Mgst1         | 5-UTR | N | 138089058 | 138096210 | 36  | 57.7 | 29.5 | 52.9 | 33.9 |
| chr11 | Lgals9        | 5-UTR | N | 78798319  | 78798426  | 1   | 35.2 | 0.0  | 20.0 | 1.3  |
| chr18 | Tslp          | 5-UTR | N | 32975037  | 32975053  | 1   | 83.3 | 65.9 | 71.6 | 53.0 |
| chr1  | Neu2          | 5-UTR | N | 89470602  | 89476079  | 28  | 59.7 | 42.4 | 51.4 | 32.9 |
| chr1  | Pikfyve       | 5-UTR | N | 65233259  | 65236901  | 15  | 33.6 | 0.0  | 38.1 | 19.8 |
| chr15 | Eppk1         | 5-UTR | N | 75943110  | 75950625  | 35  | 64.9 | 48.8 | 63.3 | 45.6 |
| chr1  | Faim3         | 5-UTR | N | 132762354 | 132762436 | 1   | 88.9 | 50.0 | 70.4 | 52.7 |
| chr11 | Lypd8         | 5-UTR | N | 58192534  | 58195834  | 16  | 33.8 | 16.2 | 28.4 | 11.1 |
| chr4  | Hdhd3         | 5-UTR | N | 62160972  | 62163234  | 9   | 71.0 | 49.3 | 50.3 | 33.2 |
| chr1  | Fhl2          | 5-UTR | N | 43210077  | 43220806  | 50  | 71.9 | 43.7 | 65.0 | 47.9 |
| chr14 | Dct           | 5-UTR | N | 118451001 | 118451468 | 2   | 20.9 | 4.9  | 22.3 | 5.3  |
| chr19 | Hps1          | 5-UTR | N | 42852729  | 42854466  | 6   | 83.8 | 68.5 | 84.0 | 67.0 |
| chr5  | Brca2         | 5-UTR | N | 151325198 | 151325787 | 1   | 30.0 | 10.4 | 32.9 | 16.3 |
| chr6  | Cacna1c       | 5-UTR | N | 119146250 | 119146427 | 1   | 85.0 | 66.7 | 82.6 | 66.0 |
| chr11 | Prr15l        | 5-UTR | N | 96790638  | 96795859  | 26  | 43.4 | 25.2 | 32.8 | 16.5 |
| chr18 | Atp8b1        | 5-UTR | N | 64765033  | 64820654  | 269 | 70.3 | 54.1 | 66.4 | 50.1 |
| chr1  | Adck3         | 5-UTR | N | 182112370 | 182126151 | 66  | 58.7 | 39.2 | 55.0 | 38.9 |
| chr10 | Rdh1          | 5-UTR | N | 127196819 | 127196993 | 1   | 32.4 | 0.0  | 19.0 | 3.0  |
| chr15 | Tmbim6        | 5-UTR | N | 99223378  | 99232038  | 39  | 46.1 | 28.8 | 49.0 | 33.4 |
| chr2  | 4930526D03Rik | 5-UTR | N | 181432361 | 181433147 | 4   | 79.0 | 56.1 | 70.1 | 54.6 |
| chr11 | Gm11545       | 5-UTR | N | 94622226  | 94622496  | 1   | 17.0 | 0.0  | 20.0 | 4.8  |
| chr8  | Sf3b3         | 5-UTR | N | 113368433 | 113370703 | 8   | 61.1 | 41.6 | 55.2 | 40.0 |
| chr12 | Slc25a29      | Exon1 | N | 110065884 | 110065967 | 1   | 66.0 | 8.5  | 86.6 | 5.4  |
| chr17 | Rgmb          | Exon1 | N | 15957634  | 15958142  | 3   | 81.0 | 18.9 | 84.1 | 15.7 |
| chr8  | Cyba          | Exon1 | N | 124950086 | 124950167 | 1   | 71.4 | 18.2 | 73.9 | 14.1 |
| chr7  | Ccdc9         | Exon1 | N | 16860605  | 16860724  | 2   | 87.5 | 48.1 | 78.4 | 20.4 |
| chr8  | Ccdc102a      | Exon1 | N | 97429157  | 97429260  | 1   | 85.4 | 25.7 | 90.1 | 32.6 |
| chr19 | Ms4a18        | Exon1 | N | 11074825  | 11074938  | 1   | 91.5 | 30.8 | 87.3 | 30.3 |
| chr18 | Grpel2        | Exon1 | N | 61878408  | 61878489  | 1   | 66.2 | 26.3 | 74.7 | 20.4 |
| chr8  | Ctcf          | Exon1 | N | 108167416 | 108167532 | 2   | 82.7 | 64.7 | 79.1 | 25.8 |
| chr14 | 9230112D13Rik | Exon1 | N | 35327566  | 35327652  | 1   | 56.5 | 5.0  | 60.2 | 8.1  |
| chr5  | Pdgfra        | Exon1 | N | 139455100 | 139455226 | 1   | 71.1 | 20.7 | 78.0 | 27.3 |

|       |               |       |   |           |           |   |      |      |       |      |
|-------|---------------|-------|---|-----------|-----------|---|------|------|-------|------|
| chr11 | Nmt1          | Exon1 | N | 102904482 | 102904590 | 1 | 87.4 | 42.0 | 87.8  | 38.2 |
| chr2  | Ap5s1         | Exon1 | N | 131036999 | 131037209 | 2 | 35.7 | 9.7  | 59.8  | 11.4 |
| chr4  | Triqk         | Exon1 | N | 12845063  | 12845212  | 2 | 56.5 | 0.0  | 61.9  | 14.6 |
| chr5  | Hps4          | Exon1 | N | 112773561 | 112774068 | 4 | 54.4 | 5.1  | 59.2  | 13.5 |
| chr7  | Mrpl48        | Exon1 | N | 107699054 | 107699143 | 1 | 42.1 | 14.3 | 54.7  | 9.2  |
| chr9  | lfrd2         | Exon1 | N | 107492234 | 107492353 | 1 | 91.4 | 36.7 | 74.6  | 30.3 |
| chr11 | Axin2         | Exon1 | N | 108784466 | 108785416 | 5 | 23.4 | 1.3  | 45.3  | 1.7  |
| chr8  | Ces1b         | Exon1 | N | 95581255  | 95581327  | 1 | 68.2 | 40.0 | 58.1  | 14.7 |
| chr17 | Foxn2         | Exon1 | N | 88862053  | 88862603  | 4 | 41.8 | 7.2  | 47.0  | 3.8  |
| chr2  | Tm9sf4        | Exon1 | N | 153004625 | 153004738 | 1 | 73.0 | 24.6 | 75.0  | 32.3 |
| chr19 | Ms4a8a        | Exon1 | N | 11142865  | 11142978  | 1 | 51.4 | 27.8 | 49.3  | 6.9  |
| chr1  | Fam129a       | Exon1 | N | 153483534 | 153483664 | 1 | 97.9 | 55.7 | 89.3  | 48.1 |
| chr14 | Nuggc         | Exon1 | N | 66225540  | 66225600  | 1 | 62.6 | 17.1 | 69.1  | 30.2 |
| chr5  | 5033403H07Rik | Exon1 | N | 53381828  | 53381976  | 1 | 21.1 | 1.7  | 43.3  | 4.8  |
| chr7  | Hsd3b7        | Exon1 | N | 134944589 | 134944760 | 3 | 86.8 | 54.5 | 89.8  | 51.9 |
| chr8  | Slc25a42      | Exon1 | N | 72712199  | 72712350  | 1 | 83.3 | 37.4 | 85.3  | 48.1 |
| chr6  | Mettl20       | Exon1 | N | 149091128 | 149091237 | 2 | 47.8 | 14.7 | 48.9  | 12.4 |
| chr2  | Tubgcp4       | Exon1 | N | 120999294 | 120999422 | 1 | 74.7 | 39.1 | 78.4  | 42.0 |
| chr6  | Tpi1          | Exon1 | N | 124761535 | 124761622 | 1 | 52.3 | 20.7 | 56.9  | 21.1 |
| chr10 | Specc1l       | Exon1 | N | 74693427  | 74693616  | 2 | 46.1 | 2.5  | 35.7  | 0.0  |
| chr1  | Tmem63a       | Exon1 | N | 182876697 | 182876896 | 2 | 63.5 | 40.5 | 55.7  | 20.6 |
| chr5  | Vsig10        | Exon1 | N | 117773509 | 117773589 | 1 | 36.4 | 6.3  | 42.3  | 7.4  |
| chr1  | Aldh9a1       | Exon1 | N | 169282651 | 169282796 | 1 | 55.2 | 14.0 | 47.4  | 12.7 |
| chr2  | Garnl3        | Exon1 | N | 32845026  | 32845152  | 1 | 66.2 | 32.9 | 60.4  | 25.9 |
| chr6  | Pzp           | Exon1 | N | 128434882 | 128434923 | 1 | 65.2 | 45.2 | 86.0  | 51.4 |
| chr13 | Nnt           | Exon1 | N | 120127183 | 120127298 | 1 | 96.5 | 42.7 | 91.5  | 57.1 |
| chr1  | Sec16b        | Exon1 | N | 159437517 | 159437684 | 2 | 50.8 | 16.2 | 47.6  | 13.2 |
| chr17 | Igf2r         | Exon1 | N | 12878004  | 12878073  | 1 | 67.9 | 19.5 | 72.1  | 38.1 |
| chr4  | Rps8          | Exon1 | N | 116826904 | 116827033 | 1 | 38.9 | 15.4 | 56.3  | 22.4 |
| chr4  | Hivep3        | Exon1 | N | 119669779 | 119669857 | 2 | 79.2 | 47.5 | 87.5  | 53.8 |
| chr3  | Dennd2d       | Exon1 | N | 106289791 | 106289966 | 2 | 84.0 | 59.2 | 85.6  | 52.5 |
| chr9  | Vipr1         | Exon1 | N | 121562917 | 121563022 | 1 | 76.6 | 41.0 | 75.3  | 42.7 |
| chr16 | Gpr156        | Exon1 | N | 37947454  | 37947905  | 3 | 92.9 | 64.4 | 95.9  | 63.8 |
| chr17 | Airm          | Exon1 | N | 13051973  | 13052118  | 2 | 45.4 | 13.7 | 54.4  | 22.5 |
| chr19 | Coro1b        | Exon1 | N | 4149342   | 4149544   | 2 | 65.8 | 41.2 | 60.7  | 28.9 |
| chr15 | Stk3          | Exon1 | N | 34874761  | 34874936  | 1 | 76.0 | 41.5 | 90.7  | 59.0 |
| chr2  | Itga6         | Exon1 | N | 71654687  | 71654811  | 1 | 58.2 | 32.4 | 60.9  | 29.6 |
| chr11 | Krt39         | Exon1 | N | 99377779  | 99377999  | 1 | 41.4 | 18.6 | 57.5  | 26.3 |
| chr5  | Plb1          | Exon1 | N | 32657159  | 32657263  | 1 | 89.5 | 68.0 | 85.6  | 54.9 |
| chr1  | Fastkd2       | Exon1 | N | 63777974  | 63778795  | 5 | 91.3 | 54.9 | 73.6  | 43.1 |
| chr10 | Cand1         | Exon1 | N | 118643772 | 118643879 | 1 | 76.4 | 20.0 | 65.4  | 34.9 |
| chr17 | Mlst8         | Exon1 | N | 24612991  | 24613154  | 2 | 88.0 | 69.0 | 100.0 | 70.0 |
| chr13 | Serpib1b      | Exon1 | N | 33177147  | 33177322  | 2 | 73.9 | 25.0 | 61.2  | 32.3 |
| chr5  | Daglb         | Exon1 | N | 144227821 | 144227972 | 1 | 78.6 | 19.9 | 63.2  | 34.6 |
| chr1  | Gsta3         | Exon1 | N | 21235019  | 21235113  | 2 | 82.0 | 51.2 | 82.5  | 54.4 |
| chr17 | Cyp4f16       | Exon1 | N | 32673943  | 32674141  | 2 | 44.7 | 21.7 | 51.8  | 23.7 |
| chr13 | Fam169a       | Exon1 | N | 97861773  | 97861907  | 2 | 44.3 | 1.8  | 37.3  | 9.5  |
| chr14 | Ldb3          | Exon1 | N | 35349751  | 35349866  | 1 | 83.8 | 12.8 | 75.6  | 48.1 |
| chr5  | Hadha         | Exon1 | N | 30446585  | 30446730  | 1 | 48.8 | 17.6 | 48.3  | 21.0 |

|       |               |       |   |           |           |   |      |      |      |      |
|-------|---------------|-------|---|-----------|-----------|---|------|------|------|------|
| chr4  | Selrc1        | Exon1 | N | 108004816 | 108004956 | 1 | 33.8 | 4.3  | 36.0 | 8.8  |
| chr4  | Stmn1         | Exon1 | N | 134026018 | 134026090 | 2 | 56.1 | 17.4 | 48.3 | 21.2 |
| chr13 | BC005537      | Exon1 | N | 24896651  | 24896827  | 1 | 57.6 | 18.4 | 50.9 | 24.0 |
| chr5  | Cyth3         | Exon1 | N | 144445265 | 144445347 | 2 | 89.0 | 61.5 | 89.4 | 62.6 |
| chr18 | Mbd1          | Exon1 | N | 74429057  | 74429192  | 2 | 39.8 | 16.5 | 44.0 | 17.8 |
| chr4  | Aco1          | Exon1 | N | 40110752  | 40110878  | 2 | 91.5 | 71.1 | 88.2 | 62.0 |
| chr12 | Hbp1          | Exon1 | N | 32613449  | 32613590  | 1 | 21.4 | 4.4  | 33.7 | 8.0  |
| chr6  | Casp2         | Exon1 | N | 42217498  | 42217648  | 1 | 66.2 | 28.7 | 53.4 | 28.4 |
| chr1  | Traf3ip3      | Exon1 | N | 195004358 | 195004494 | 2 | 87.5 | 45.2 | 70.9 | 45.9 |
| chr3  | Slc2a2        | Exon1 | N | 28604652  | 28604744  | 1 | 62.9 | 17.6 | 53.9 | 28.9 |
| chr8  | Cox4i1        | Exon1 | N | 123193209 | 123193282 | 2 | 62.9 | 44.3 | 64.1 | 39.8 |
| chr8  | Lrrc8e        | Exon1 | N | 4231662   | 4231804   | 2 | 54.5 | 34.7 | 51.6 | 27.8 |
| chr10 | Agap2         | Exon1 | N | 126519420 | 126519478 | 1 | 31.9 | 10.2 | 40.7 | 16.8 |
| chr7  | Kcne3         | Exon1 | N | 107326497 | 107326752 | 2 | 21.5 | 2.7  | 26.3 | 2.6  |
| chr6  | Slc15a5       | Exon1 | N | 137935894 | 137936002 | 1 | 83.3 | 65.6 | 82.9 | 59.4 |
| chr2  | Cdca7         | Exon1 | N | 72316963  | 72317085  | 1 | 94.7 | 60.3 | 91.3 | 68.5 |
| chr12 | 4930465M20Rik | Exon1 | N | 108967706 | 108968049 | 2 | 54.7 | 12.1 | 43.1 | 20.3 |
| chr7  | Vrk3          | Exon1 | N | 52007485  | 52007546  | 1 | 87.0 | 63.2 | 82.8 | 60.2 |
| chr6  | Slco1b2       | Exon1 | N | 141581602 | 141581685 | 2 | 95.1 | 69.6 | 86.5 | 64.6 |
| chr4  | Alad          | Exon1 | N | 62171139  | 62171268  | 1 | 88.9 | 73.8 | 88.6 | 67.2 |
| chr5  | Fam109a       | Exon1 | N | 122300479 | 122300555 | 1 | 29.5 | 5.7  | 27.2 | 6.0  |
| chr6  | Rpl32         | Exon1 | N | 115757004 | 115757185 | 1 | 26.7 | 6.3  | 28.7 | 7.8  |
| chr5  | 1700007G11Rik | Exon1 | N | 98775251  | 98775381  | 1 | 74.5 | 53.7 | 74.0 | 53.2 |
| chr8  | 5430403N17Rik | Exon1 | N | 36934240  | 36934466  | 1 | 81.7 | 58.5 | 76.2 | 55.6 |
| chr16 | Tmprss7       | Exon1 | N | 45658156  | 45658292  | 1 | 35.9 | 3.6  | 24.3 | 3.7  |
| chr2  | Slc9a8        | Exon1 | N | 167249619 | 167249797 | 1 | 78.4 | 63.0 | 81.8 | 61.6 |
| chr5  | Dtx2          | Exon1 | N | 136472160 | 136472322 | 2 | 87.9 | 66.3 | 86.8 | 66.7 |
| chr1  | Dars2         | Exon1 | N | 162973744 | 162973819 | 1 | 23.3 | 0.0  | 20.0 | 0.0  |
| chr13 | Gcnt2         | Exon1 | N | 41048945  | 41049040  | 1 | 80.6 | 63.0 | 78.9 | 58.9 |
| chr2  | Acvr2a        | Exon1 | N | 48725809  | 48726016  | 1 | 81.8 | 42.7 | 56.0 | 36.1 |
| chr18 | Dym           | Exon1 | N | 75202733  | 75202923  | 2 | 87.5 | 67.5 | 82.7 | 62.8 |
| chr15 | 4930415O20Rik | Exon1 | N | 98415701  | 98415823  | 1 | 22.3 | 2.3  | 22.0 | 2.2  |
| chr14 | Gnpnat1       | Exon1 | N | 46000612  | 46000673  | 1 | 64.4 | 28.7 | 41.7 | 22.1 |
| chr9  | Mrps22        | Exon1 | N | 98490454  | 98490562  | 1 | 87.1 | 55.2 | 83.0 | 63.6 |
| chr3  | Nhlrc3        | Exon1 | N | 53257464  | 53257576  | 1 | 79.1 | 63.2 | 79.2 | 60.2 |
| chr16 | Mgrn1         | Exon1 | N | 4907365   | 4907486   | 1 | 80.9 | 49.1 | 68.8 | 50.0 |
| chr17 | Dus3l         | Exon1 | N | 56904948  | 56905215  | 1 | 46.7 | 25.4 | 48.8 | 30.4 |
| chr7  | Rab30         | Exon1 | N | 99968493  | 99968593  | 2 | 59.0 | 25.6 | 45.2 | 26.8 |
| chr11 | Clint1        | Exon1 | N | 45697212  | 45697316  | 1 | 51.2 | 25.4 | 44.6 | 26.3 |
| chr17 | 4833427F10Rik | Exon1 | N | 35913821  | 35914168  | 2 | 23.4 | 1.1  | 26.0 | 7.9  |
| chr6  | Hrh1          | Exon1 | N | 114358768 | 114358914 | 2 | 77.8 | 54.7 | 79.6 | 61.6 |
| chr8  | Mbtps1        | Exon1 | N | 122034154 | 122034284 | 1 | 84.1 | 55.3 | 88.9 | 71.1 |
| chr17 | Mrpl28        | Exon1 | N | 26261501  | 26261653  | 1 | 70.6 | 41.9 | 60.8 | 43.4 |
| chr9  | Slc35f2       | Exon1 | N | 53645645  | 53645820  | 1 | 70.4 | 45.8 | 63.1 | 45.9 |
| chr11 | 9530048J24Rik | Exon1 | N | 85581065  | 85581335  | 1 | 96.9 | 80.0 | 97.7 | 80.5 |
| chr10 | Pbld1         | Exon1 | N | 62528532  | 62528631  | 1 | 33.3 | 4.5  | 19.7 | 2.5  |
| chr13 | Gprin1        | Exon1 | N | 54843370  | 54843469  | 2 | 77.1 | 59.5 | 82.2 | 65.1 |
| chr8  | Nqo1          | Exon1 | N | 109914945 | 109915046 | 1 | 74.8 | 51.9 | 67.6 | 50.8 |
| chr1  | Pm20d1        | Exon1 | N | 133695173 | 133695259 | 1 | 69.4 | 44.0 | 70.3 | 53.5 |

|       |          |       |   |           |           |   |      |      |      |      |
|-------|----------|-------|---|-----------|-----------|---|------|------|------|------|
| chr17 | Ly6g6c   | Exon1 | N | 35205812  | 35205922  | 1 | 39.5 | 24.2 | 50.7 | 33.9 |
| chr17 | Pou5f1   | Exon1 | N | 35646048  | 35646168  | 2 | 55.7 | 40.6 | 54.7 | 38.0 |
| chr5  | Tmem120a | Exon1 | N | 136211767 | 136211835 | 1 | 85.8 | 56.0 | 92.5 | 75.9 |
| chr6  | Zxdc     | Exon1 | N | 90322536  | 90322688  | 1 | 55.3 | 30.3 | 54.0 | 37.6 |
| chr13 | Preli1   | Exon1 | N | 55424214  | 55424439  | 2 | 52.1 | 33.4 | 49.4 | 33.1 |
| chr17 | Bnip1    | Exon1 | N | 26920390  | 26920482  | 1 | 91.3 | 67.4 | 86.8 | 70.6 |
| chr4  | Srsf10   | Exon1 | N | 135414220 | 135414324 | 1 | 64.7 | 39.6 | 62.8 | 46.9 |
| chr9  | Gm10684  | Exon1 | N | 44918068  | 44918842  | 4 | 84.5 | 65.1 | 86.5 | 70.6 |
| chr9  | Taf1d    | Exon1 | N | 15112172  | 15112265  | 2 | 57.3 | 25.0 | 60.2 | 44.3 |
| chr3  | Arhgap29 | Exon1 | N | 121676797 | 121677033 | 2 | 67.0 | 36.7 | 57.3 | 41.5 |
| chr13 | Vps41    | Exon1 | N | 18815057  | 18815095  | 1 | 76.6 | 56.6 | 75.0 | 60.0 |
| chr1  | Pigr     | Exon1 | N | 132723261 | 132723384 | 1 | 71.9 | 7.7  | 70.8 | 2.7  |
| chr10 | Vnn3     | Exon1 | N | 23571268  | 23571602  | 2 | 80.2 | 0.0  | 67.7 | 0.6  |
| chr15 | Apol10a  | Exon1 | N | 77307477  | 77307561  | 1 | 86.2 | 11.0 | 87.1 | 24.8 |
| chr13 | Naip1    | Exon1 | N | 101222753 | 101222819 | 1 | 51.7 | 6.1  | 64.6 | 6.5  |
| chr17 | Slc22a1  | Exon1 | N | 12868112  | 12868704  | 3 | 55.3 | 11.9 | 70.3 | 14.7 |
| chr17 | Xdh      | Exon1 | N | 74299418  | 74299522  | 2 | 69.6 | 0.3  | 55.5 | 0.0  |
| chr12 | Agmo     | Exon1 | N | 37968226  | 37968754  | 3 | 28.8 | 9.7  | 58.6 | 7.4  |
| chr8  | Snx20    | Exon1 | N | 91159885  | 91160027  | 1 | 74.6 | 26.1 | 73.4 | 24.1 |
| chr9  | Casp1    | Exon1 | N | 5298517   | 5298723   | 2 | 56.2 | 3.1  | 48.2 | 0.8  |
| chr8  | Ces2c    | Exon1 | N | 107370968 | 107371108 | 2 | 53.8 | 10.7 | 52.9 | 6.1  |
| chr7  | Tmem150b | Exon1 | N | 4676510   | 4676853   | 3 | 40.3 | 3.1  | 48.5 | 1.7  |
| chr11 | Gm11437  | Exon1 | N | 83980829  | 83980978  | 2 | 50.9 | 4.0  | 85.1 | 39.0 |
| chr5  | Azgp1    | Exon1 | N | 138422749 | 138422848 | 2 | 38.1 | 0.0  | 48.7 | 4.7  |
| chr5  | Hsd17b13 | Exon1 | N | 104406125 | 104406407 | 2 | 93.9 | 10.7 | 84.4 | 41.1 |
| chr8  | Ces2g    | Exon1 | N | 107485618 | 107485763 | 2 | 40.5 | 0.0  | 42.9 | 0.4  |
| chr1  | Aox3     | Exon1 | N | 58169980  | 58170156  | 2 | 54.2 | 31.1 | 48.9 | 7.3  |
| chr10 | Rdh1     | Exon1 | N | 127196819 | 127197306 | 3 | 58.8 | 0.0  | 64.4 | 23.4 |
| chr10 | Mettl7b  | Exon1 | N | 128397497 | 128398044 | 3 | 76.4 | 4.2  | 47.5 | 6.9  |
| chr1  | Apobec4  | Exon1 | N | 154597681 | 154597894 | 2 | 44.1 | 3.3  | 50.5 | 10.3 |
| chr12 | Numb     | Exon1 | N | 85183168  | 85183308  | 2 | 72.8 | 40.8 | 82.9 | 44.2 |
| chr17 | Acer1    | Exon1 | N | 57121412  | 57121549  | 2 | 42.6 | 23.5 | 59.6 | 21.5 |
| chr7  | Ceacam20 | Exon1 | N | 20550761  | 20550888  | 2 | 41.7 | 0.0  | 38.1 | 0.0  |
| chr6  | Aqp1     | Exon1 | N | 55286293  | 55286868  | 3 | 79.5 | 9.2  | 56.5 | 18.5 |
| chr4  | Cyp4b1   | Exon1 | N | 115320113 | 115320310 | 2 | 61.6 | 18.4 | 61.1 | 23.4 |
| chr7  | Dmpk     | Exon1 | N | 19669198  | 19669503  | 2 | 39.5 | 5.4  | 41.5 | 7.0  |
| chr3  | Arl14    | Exon1 | N | 69026341  | 69027540  | 7 | 26.8 | 10.2 | 38.9 | 6.0  |
| chr18 | Sh3rf2   | Exon1 | N | 42213364  | 42213849  | 3 | 25.5 | 7.3  | 43.2 | 10.6 |
| chr7  | Cln3     | Exon1 | N | 133727688 | 133727794 | 1 | 52.7 | 20.2 | 46.0 | 13.6 |
| chr7  | Mrgprd   | Exon1 | N | 152500740 | 152501188 | 3 | 91.1 | 70.3 | 91.9 | 59.6 |
| chr1  | Abca12   | Exon1 | N | 71461088  | 71461484  | 3 | 52.9 | 21.8 | 61.7 | 30.0 |
| chr14 | Acox2    | Exon1 | N | 9091336   | 9091533   | 2 | 66.1 | 9.8  | 33.0 | 1.4  |
| chr13 | Naip6    | Exon1 | N | 101085939 | 101086571 | 4 | 65.1 | 11.5 | 52.6 | 21.0 |
| chr13 | Tubal3   | Exon1 | N | 3923941   | 3923983   | 2 | 86.7 | 26.1 | 31.4 | 0.0  |
| chr8  | Tnfsf13b | Exon1 | N | 10006633  | 10007160  | 2 | 46.4 | 21.3 | 58.7 | 27.8 |
| chr9  | Nr2e3    | Exon1 | N | 59797595  | 59797886  | 2 | 54.3 | 23.1 | 52.3 | 21.5 |
| chr1  | Slc9a4   | Exon1 | N | 40637072  | 40637616  | 2 | 17.0 | 1.0  | 33.7 | 3.0  |
| chr4  | Tnfrsf18 | Exon1 | N | 155400451 | 155400646 | 2 | 33.4 | 16.4 | 44.5 | 13.9 |
| chr3  | P2ry1    | Exon1 | N | 60806717  | 60808521  | 4 | 62.2 | 13.6 | 57.3 | 26.9 |

|       |               |       |   |           |           |    |      |      |      |      |
|-------|---------------|-------|---|-----------|-----------|----|------|------|------|------|
| chr8  | Il17c         | Exon1 | N | 124945985 | 124946305 | 2  | 88.3 | 37.1 | 81.9 | 52.1 |
| chr5  | 1700018F24Rik | Exon1 | N | 145803859 | 145804037 | 2  | 76.2 | 50.7 | 69.1 | 40.3 |
| chr2  | 4833423E24Rik | Exon1 | N | 85358585  | 85359092  | 3  | 72.7 | 49.5 | 77.8 | 49.2 |
| chr7  | Apoc4         | Exon1 | N | 20266654  | 20266809  | 2  | 34.6 | 9.1  | 73.7 | 45.4 |
| chr19 | Kcnk7         | Exon1 | N | 5704476   | 5704794   | 2  | 61.4 | 44.6 | 53.5 | 25.2 |
| chr17 | Nlrc4         | Exon1 | N | 74858346  | 74858448  | 1  | 28.0 | 3.1  | 27.9 | 0.8  |
| chr10 | Rdh16         | Exon1 | N | 127238209 | 127238566 | 3  | 88.4 | 50.9 | 90.5 | 64.5 |
| chr7  | Muc2          | Exon1 | N | 148876239 | 148876343 | 2  | 34.8 | 14.6 | 35.6 | 9.8  |
| chr3  | Fabp2         | Exon1 | N | 122597990 | 122598397 | 3  | 41.4 | 0.3  | 32.6 | 6.8  |
| chr7  | Gm7092        | Exon1 | N | 26400682  | 26400911  | 2  | 43.4 | 7.9  | 30.6 | 6.7  |
| chr3  | Ctss          | Exon1 | N | 95330708  | 95330847  | 2  | 42.3 | 10.8 | 39.2 | 15.4 |
| chr7  | BC051019      | Exon1 | N | 116866918 | 116867285 | 2  | 77.9 | 62.2 | 62.4 | 38.5 |
| chr7  | Zfp541        | Exon1 | N | 16657291  | 16657597  | 2  | 43.4 | 11.5 | 34.1 | 10.4 |
| chr11 | Scgb3a1       | Exon1 | N | 49477097  | 49477217  | 1  | 40.0 | 9.1  | 30.3 | 6.7  |
| chr10 | Lyz1          | Exon1 | N | 116729759 | 116729924 | 2  | 39.0 | 17.0 | 52.3 | 28.8 |
| chr6  | Akr1b7        | Exon1 | N | 34362362  | 34362475  | 2  | 67.6 | 37.5 | 58.6 | 36.1 |
| chr19 | Pnliprp2      | Exon1 | N | 58834213  | 58834366  | 2  | 63.2 | 24.5 | 50.4 | 28.1 |
| chr17 | Slc3a1        | Exon1 | N | 85427687  | 85428198  | 2  | 48.6 | 28.4 | 81.1 | 59.0 |
| chr1  | Mars2         | Exon1 | N | 55294021  | 55296902  | 7  | 45.8 | 3.2  | 38.6 | 17.1 |
| chr10 | Ros1          | Exon1 | N | 51914637  | 51915050  | 2  | 69.6 | 39.1 | 63.2 | 41.7 |
| chr6  | H2afj         | Exon1 | N | 136756769 | 136758595 | 3  | 42.4 | 12.5 | 26.7 | 5.5  |
| chr10 | Gm19402       | Exon1 | N | 77152702  | 77153502  | 4  | 52.5 | 4.1  | 45.6 | 24.6 |
| chr7  | Leng9         | Exon1 | N | 4099785   | 4101474   | 3  | 69.0 | 52.4 | 54.3 | 33.3 |
| chr2  | Tlhc2         | Exon1 | N | 156912791 | 156912823 | 1  | 26.1 | 0.0  | 20.4 | 0.0  |
| chr16 | Gpr128        | Exon1 | N | 56795660  | 56795971  | 2  | 16.2 | 0.6  | 20.2 | 0.0  |
| chr6  | Tmem52b       | Exon1 | N | 129462575 | 129463122 | 3  | 52.3 | 36.4 | 65.4 | 45.4 |
| chr11 | Krtap3-1      | Exon1 | N | 99427341  | 99427944  | 3  | 88.8 | 52.2 | 73.2 | 53.2 |
| chr6  | Cml5          | Exon1 | N | 85770901  | 85770966  | 1  | 65.7 | 30.4 | 60.7 | 41.6 |
| chr4  | Olf1337       | Exon1 | N | 118454241 | 118455191 | 6  | 77.4 | 60.0 | 85.3 | 66.1 |
| chr7  | Olf1644       | Exon1 | N | 111216599 | 111217543 | 5  | 77.6 | 54.9 | 68.8 | 50.0 |
| chr11 | Lgals9        | Exon1 | N | 78798280  | 78798426  | 2  | 62.4 | 9.6  | 20.0 | 1.3  |
| chr2  | Ifih1         | Exon1 | N | 62483535  | 62484312  | 1  | 59.6 | 29.2 | 36.4 | 18.0 |
| chr11 | Hoxb3         | Exon1 | N | 96184440  | 96184759  | 2  | 88.1 | 63.8 | 88.5 | 70.2 |
| chr7  | Mia           | Exon1 | N | 27965941  | 27966168  | 2  | 57.3 | 39.6 | 48.9 | 30.7 |
| chr9  | Slc51b        | Exon1 | N | 65270554  | 65270580  | 1  | 58.5 | 15.3 | 40.2 | 22.1 |
| chr19 | Olf1502       | Exon1 | N | 13936285  | 13937235  | 5  | 96.9 | 60.0 | 64.8 | 46.9 |
| chr19 | Naaladl1      | Exon1 | N | 6105798   | 6105997   | 1  | 38.5 | 18.6 | 34.6 | 16.8 |
| chr6  | Vmn1r4        | Exon1 | N | 56906507  | 56907400  | 4  | 78.7 | 62.7 | 76.4 | 58.6 |
| chr1  | Faim3         | Exon1 | N | 132762354 | 132762473 | 2  | 88.9 | 50.0 | 70.4 | 52.7 |
| chr5  | Gm5108        | Exon1 | N | 68332908  | 68333099  | 2  | 51.3 | 31.2 | 35.6 | 18.2 |
| chr8  | F7            | Exon1 | N | 13026034  | 13026131  | 2  | 70.8 | 45.0 | 57.1 | 40.0 |
| chr8  | Stox2         | Exon1 | N | 48437385  | 48437702  | 2  | 20.3 | 0.0  | 18.7 | 1.7  |
| chr7  | Crebzf        | Exon1 | N | 97591291  | 97596553  | 18 | 59.1 | 24.8 | 40.7 | 24.0 |
| chr11 | Lpo           | Exon1 | N | 87639244  | 87639616  | 2  | 33.4 | 15.0 | 35.9 | 19.1 |
| chr6  | Cacna1c       | Exon1 | N | 119146111 | 119146427 | 2  | 85.0 | 66.7 | 82.6 | 66.0 |
| chr3  | Rbm15         | Exon1 | N | 107133133 | 107136207 | 8  | 38.2 | 18.6 | 43.9 | 27.4 |
| chr6  | Olf1441       | Exon1 | N | 43065743  | 43066675  | 5  | 73.3 | 51.0 | 73.5 | 57.3 |
| chr7  | Olf1661       | Exon1 | N | 111836531 | 111837490 | 5  | 88.2 | 70.2 | 90.9 | 75.0 |
| chr2  | Bpifa1        | Exon1 | N | 153968616 | 153968662 | 1  | 73.1 | 56.9 | 73.2 | 57.4 |



|       |               |          |   |           |           |   |      |      |      |      |
|-------|---------------|----------|---|-----------|-----------|---|------|------|------|------|
| chr2  | Olf1129       | Exon1    | N | 87415243  | 87416187  | 5 | 97.4 | 66.7 | 88.9 | 73.1 |
| chr10 | Taar9         | Exon1    | N | 23828294  | 23829340  | 5 | 91.3 | 58.4 | 77.3 | 61.8 |
| chr14 | Sftpd         | Exon1    | N | 41998414  | 41998487  | 1 | 74.6 | 50.7 | 63.7 | 48.5 |
| chr8  | Proz          | Exon1    | N | 13060908  | 13061099  | 2 | 73.2 | 38.5 | 43.1 | 27.9 |
| chr14 | Mat1a         | Exon1    | N | 41918322  | 41918549  | 2 | 67.6 | 52.1 | 70.3 | 55.3 |
| chr9  | Casp1         | Upstream | N | 5297517   | 5298516   | 5 | 47.9 | 6.5  | 85.6 | 2.9  |
| chr15 | Apol10a       | Upstream | N | 77306477  | 77307476  | 5 | 64.0 | 3.0  | 82.9 | 8.5  |
| chr3  | Hsd3b3        | Upstream | N | 98567052  | 98568051  | 6 | 91.1 | 26.9 | 92.9 | 26.2 |
| chr9  | Zw10          | Upstream | N | 48862686  | 48863685  | 4 | 89.1 | 1.8  | 59.3 | 0.0  |
| chr1  | Pigr          | Upstream | N | 132722261 | 132723260 | 5 | 77.8 | 26.1 | 78.8 | 21.6 |
| chr9  | Ctnnb1        | Upstream | N | 120841518 | 120842517 | 2 | 33.5 | 3.9  | 63.0 | 6.5  |
| chr7  | Olf1713       | Upstream | N | 114178650 | 114179649 | 5 | 70.3 | 43.2 | 87.8 | 33.2 |
| chr2  | Fam107b       | Upstream | N | 3629730   | 3630729   | 3 | 66.7 | 32.8 | 63.5 | 9.4  |
| chr16 | Mir802        | Upstream | N | 93368965  | 93369964  | 5 | 71.8 | 10.0 | 74.0 | 20.4 |
| chr6  | Avl9          | Upstream | N | 56663899  | 56664898  | 3 | 64.6 | 25.0 | 72.1 | 18.9 |
| chr5  | Ccl26         | Upstream | N | 136039440 | 136040439 | 5 | 37.6 | 14.3 | 68.6 | 15.9 |
| chr2  | Prrg4         | Upstream | N | 104690008 | 104691007 | 4 | 55.5 | 12.1 | 57.2 | 4.8  |
| chr3  | Il21          | Upstream | N | 37131541  | 37132540  | 4 | 82.6 | 56.0 | 81.0 | 28.6 |
| chr11 | Gm12250       | Upstream | N | 57996345  | 57997344  | 5 | 81.6 | 12.4 | 69.7 | 17.8 |
| chr16 | Dnaja3        | Upstream | N | 4683070   | 4684069   | 3 | 28.0 | 9.9  | 53.3 | 3.5  |
| chr14 | Usp54         | Upstream | N | 21437577  | 21438576  | 5 | 75.9 | 33.3 | 78.4 | 29.1 |
| chr19 | E030003E18Rik | Upstream | N | 20566205  | 20567204  | 5 | 67.7 | 23.1 | 72.3 | 23.1 |
| chr7  | C5ar2         | Upstream | N | 16829504  | 16830503  | 5 | 85.1 | 48.5 | 96.1 | 47.3 |
| chr7  | Olf1690       | Upstream | N | 112478793 | 112479792 | 5 | 72.9 | 17.2 | 76.0 | 27.5 |
| chr11 | Slc22a5       | Upstream | N | 53705206  | 53706205  | 2 | 35.4 | 13.7 | 56.9 | 8.9  |
| chr19 | Ifit3         | Upstream | N | 34657019  | 34658018  | 5 | 72.0 | 52.2 | 83.1 | 37.1 |
| chr5  | Niacr1        | Upstream | N | 124315526 | 124316525 | 5 | 90.9 | 71.0 | 91.0 | 45.2 |
| chr2  | Cd302         | Upstream | N | 60122476  | 60123475  | 5 | 47.3 | 25.3 | 52.7 | 6.9  |
| chr9  | Tmem123       | Upstream | N | 7763077   | 7764076   | 2 | 47.1 | 29.0 | 69.5 | 24.2 |
| chr11 | Atp10b        | Upstream | N | 42962379  | 42963378  | 5 | 57.8 | 21.6 | 47.7 | 2.4  |
| chr9  | Nnmt          | Upstream | N | 48413183  | 48414182  | 5 | 37.1 | 6.1  | 55.7 | 10.5 |
| chr15 | Krt81         | Upstream | N | 101294197 | 101295196 | 5 | 58.6 | 17.8 | 58.5 | 13.5 |
| chr17 | Cyp4f14       | Upstream | N | 33054288  | 33055287  | 5 | 64.8 | 4.9  | 58.0 | 13.8 |
| chr14 | Diap3         | Upstream | N | 87540922  | 87541921  | 3 | 58.9 | 13.1 | 63.2 | 19.1 |
| chr12 | Tomm20l       | Upstream | N | 72211415  | 72212414  | 4 | 60.9 | 15.1 | 71.9 | 28.8 |
| chr11 | E030025P04Rik | Upstream | N | 109005684 | 109006683 | 5 | 55.7 | 26.8 | 69.0 | 26.0 |
| chr10 | Utp20         | Upstream | N | 88289560  | 88290559  | 4 | 43.9 | 0.8  | 43.8 | 0.8  |
| chr17 | Kif6          | Upstream | N | 49753497  | 49754496  | 3 | 79.6 | 33.1 | 42.3 | 0.0  |
| chr6  | Pzp           | Upstream | N | 128476739 | 128477738 | 5 | 80.0 | 25.0 | 56.0 | 14.0 |
| chr11 | Hoxb9         | Upstream | N | 96131644  | 96132643  | 2 | 34.3 | 10.6 | 46.5 | 4.6  |
| chr18 | Commd10       | Upstream | N | 47117530  | 47118529  | 3 | 44.6 | 0.8  | 43.4 | 1.5  |
| chr14 | Epsti1        | Upstream | N | 78303046  | 78304045  | 5 | 54.1 | 5.8  | 50.8 | 9.5  |
| chr4  | Gem           | Upstream | N | 11630594  | 11631593  | 3 | 67.3 | 37.4 | 69.1 | 28.3 |
| chr9  | Gorasp1       | Upstream | N | 119846677 | 119847676 | 3 | 59.2 | 36.2 | 80.7 | 39.9 |
| chr18 | Ttr           | Upstream | N | 20822751  | 20823750  | 5 | 42.9 | 27.3 | 40.6 | 0.0  |
| chr4  | Mup21         | Upstream | N | 61811876  | 61812875  | 5 | 54.9 | 38.5 | 77.0 | 36.7 |
| chr1  | Stx6          | Upstream | N | 157004833 | 157005832 | 3 | 84.5 | 54.0 | 95.8 | 56.0 |
| chr7  | Tmem86b       | Upstream | N | 4582085   | 4583084   | 5 | 65.6 | 1.7  | 48.8 | 9.7  |
| chr7  | Gde1          | Upstream | N | 125849253 | 125850252 | 4 | 78.9 | 57.0 | 91.5 | 52.5 |

|       |               |          |   |           |           |   |       |      |      |      |
|-------|---------------|----------|---|-----------|-----------|---|-------|------|------|------|
| chr16 | Cpox          | Upstream | N | 58669321  | 58670320  | 3 | 54.5  | 12.0 | 56.6 | 18.0 |
| chr3  | Adh6a         | Upstream | N | 137975250 | 137976249 | 5 | 81.3  | 48.6 | 86.9 | 48.5 |
| chr3  | Lrrc39        | Upstream | N | 116264891 | 116265890 | 5 | 83.6  | 28.9 | 74.1 | 35.8 |
| chr11 | Dusp18        | Upstream | N | 3794243   | 3795242   | 1 | 56.6  | 39.5 | 64.6 | 26.4 |
| chr5  | Fam175a       | Upstream | N | 101249955 | 101250954 | 3 | 51.3  | 31.8 | 54.2 | 16.2 |
| chr15 | Adck5         | Upstream | N | 76405789  | 76406788  | 4 | 64.7  | 22.7 | 62.2 | 24.5 |
| chr11 | Chac2         | Upstream | N | 30886366  | 30887365  | 5 | 33.7  | 16.8 | 48.5 | 10.7 |
| chr13 | Txndc5        | Upstream | N | 38620330  | 38621329  | 1 | 74.5  | 39.2 | 72.8 | 35.3 |
| chr19 | As3mt         | Upstream | N | 46780933  | 46781932  | 4 | 87.3  | 42.6 | 40.6 | 3.5  |
| chr17 | H2-M5         | Upstream | N | 37126450  | 37127449  | 5 | 57.8  | 39.0 | 71.2 | 34.3 |
| chr7  | Trim6         | Upstream | N | 111366309 | 111367308 | 4 | 88.6  | 50.8 | 49.7 | 12.8 |
| chr7  | Sult1a1       | Upstream | N | 133819872 | 133820871 | 5 | 37.5  | 6.9  | 41.0 | 4.2  |
| chr11 | Stat5a        | Upstream | N | 100719665 | 100720664 | 5 | 73.4  | 47.8 | 80.5 | 43.7 |
| chr5  | 5830473C10Rik | Upstream | N | 90989235  | 90990234  | 5 | 84.7  | 57.4 | 84.4 | 47.8 |
| chr7  | Rccd1         | Upstream | N | 87469341  | 87470340  | 4 | 74.7  | 53.2 | 70.6 | 34.1 |
| chr10 | Rdh9          | Upstream | N | 127212461 | 127213460 | 5 | 80.6  | 34.1 | 38.6 | 2.9  |
| chr17 | Xdh           | Upstream | N | 74299523  | 74300522  | 5 | 54.2  | 28.2 | 56.4 | 20.7 |
| chr16 | Il1rap        | Upstream | N | 26580791  | 26581790  | 2 | 87.5  | 57.1 | 82.5 | 47.2 |
| chr6  | Gabarapl1     | Upstream | N | 129482210 | 129483209 | 4 | 60.4  | 29.6 | 40.1 | 5.2  |
| chr14 | Rnase12       | Upstream | N | 51676918  | 51677917  | 5 | 55.7  | 29.5 | 61.3 | 26.5 |
| chr15 | Csf2rb        | Upstream | N | 78155420  | 78156419  | 5 | 61.8  | 38.0 | 60.7 | 26.1 |
| chr11 | Gas7          | Upstream | N | 67345500  | 67346499  | 5 | 36.7  | 4.8  | 43.1 | 8.8  |
| chr11 | A430071A18Rik | Upstream | N | 119695680 | 119696679 | 5 | 64.7  | 3.3  | 35.5 | 1.4  |
| chr7  | Dmpk          | Upstream | N | 19668198  | 19669197  | 5 | 59.7  | 35.3 | 57.7 | 24.0 |
| chr6  | Cftr          | Upstream | N | 18119687  | 18120686  | 2 | 44.5  | 14.1 | 46.2 | 12.6 |
| chr4  | Rgs3          | Upstream | N | 62279706  | 62280705  | 5 | 77.8  | 51.4 | 78.5 | 45.0 |
| chr5  | Tlr1          | Upstream | N | 65324798  | 65325797  | 5 | 39.7  | 5.6  | 81.5 | 48.2 |
| chr7  | Klk1b11       | Upstream | N | 51250249  | 51251248  | 5 | 36.6  | 7.4  | 43.1 | 10.0 |
| chr17 | Cyp4f40       | Upstream | N | 32795428  | 32796427  | 5 | 78.8  | 33.6 | 75.7 | 42.7 |
| chr6  | A2m           | Upstream | N | 121585191 | 121586190 | 5 | 91.3  | 66.0 | 56.7 | 23.8 |
| chr17 | Ppm1b         | Upstream | N | 85372392  | 85373391  | 5 | 82.2  | 52.9 | 78.0 | 45.1 |
| chr16 | Zfp263        | Upstream | N | 3743099   | 3744098   | 2 | 40.3  | 2.1  | 38.2 | 5.4  |
| chr3  | Gstm7         | Upstream | N | 107734664 | 107735663 | 5 | 34.9  | 4.7  | 35.4 | 2.9  |
| chr10 | 9230102K24Rik | Upstream | N | 110036706 | 110037705 | 5 | 28.9  | 3.7  | 33.1 | 1.1  |
| chr12 | Acyp1         | Upstream | N | 86621386  | 86622385  | 4 | 35.3  | 5.9  | 69.1 | 37.1 |
| chr2  | BC039771      | Upstream | N | 145525931 | 145526930 | 5 | 73.1  | 14.9 | 66.6 | 34.7 |
| chr8  | Nat3          | Upstream | N | 70046753  | 70047752  | 5 | 88.4  | 22.2 | 62.1 | 30.2 |
| chr7  | Psg23         | Upstream | N | 19201851  | 19202850  | 5 | 34.7  | 4.7  | 34.1 | 2.4  |
| chr17 | Fbxl17        | Upstream | N | 63849930  | 63850929  | 3 | 94.0  | 68.9 | 86.6 | 55.1 |
| chr18 | Htr4          | Upstream | N | 62482858  | 62483857  | 2 | 57.6  | 29.8 | 65.4 | 34.0 |
| chr11 | St6galnac2    | Upstream | N | 116555975 | 116556974 | 3 | 26.3  | 9.5  | 40.6 | 9.4  |
| chr11 | Dhrs11        | Upstream | N | 84642506  | 84643505  | 2 | 91.6  | 59.7 | 83.7 | 52.6 |
| chr17 | 2010106C02Rik | Upstream | N | 86686519  | 86687518  | 5 | 100.0 | 55.7 | 67.2 | 36.8 |
| chr5  | Btc           | Upstream | N | 91832021  | 91833020  | 5 | 47.8  | 0.0  | 30.9 | 0.7  |
| chr13 | Naip2         | Upstream | N | 100972048 | 100973047 | 5 | 61.8  | 38.5 | 68.7 | 38.5 |
| chr8  | Mir138-2      | Upstream | N | 96847211  | 96848210  | 5 | 73.0  | 56.5 | 84.4 | 54.2 |
| chr4  | Isg15         | Upstream | N | 155574928 | 155575927 | 5 | 68.3  | 38.2 | 70.0 | 40.0 |
| chr5  | Cxcl5         | Upstream | N | 91187324  | 91188323  | 5 | 63.4  | 37.2 | 46.4 | 16.6 |
| chr4  | Acot7         | Upstream | N | 151551209 | 151552208 | 1 | 31.8  | 5.2  | 35.8 | 6.0  |

|       |               |          |   |           |           |   |       |      |      |      |
|-------|---------------|----------|---|-----------|-----------|---|-------|------|------|------|
| chr7  | Ceacam12      | Upstream | N | 18650278  | 18651277  | 5 | 61.5  | 27.7 | 72.6 | 42.9 |
| chr8  | Tnfsf13b      | Upstream | N | 10005633  | 10006632  | 5 | 54.1  | 14.4 | 47.8 | 18.1 |
| chr15 | 5430437J10Rik | Upstream | N | 5445318   | 5446317   | 5 | 82.8  | 64.9 | 74.4 | 44.8 |
| chr1  | Cd55          | Upstream | N | 132359318 | 132360317 | 4 | 64.5  | 43.3 | 76.5 | 46.9 |
| chr2  | Patl2         | Upstream | N | 122011926 | 122012925 | 3 | 25.6  | 5.8  | 38.1 | 8.5  |
| chr17 | Lhfp15        | Upstream | N | 28711664  | 28712663  | 2 | 55.1  | 29.9 | 78.6 | 49.4 |
| chr7  | Atp1a3        | Upstream | N | 25790915  | 25791914  | 3 | 77.0  | 50.0 | 77.8 | 48.6 |
| chr8  | Snpc2         | Upstream | N | 4252102   | 4253101   | 3 | 40.9  | 20.4 | 48.6 | 19.4 |
| chr14 | Adamdec1      | Upstream | N | 69200130  | 69201129  | 5 | 100.0 | 45.0 | 94.1 | 65.0 |
| chr11 | BC018473      | Upstream | N | 116612481 | 116613480 | 5 | 34.6  | 15.0 | 45.9 | 17.0 |
| chr2  | 8030442B05Rik | Upstream | N | 11320128  | 11321127  | 5 | 44.5  | 17.5 | 48.6 | 19.8 |
| chr19 | Lipn          | Upstream | N | 34140848  | 34141847  | 5 | 69.7  | 31.9 | 68.6 | 40.1 |
| chr1  | Smyd2         | Upstream | N | 191746168 | 191747167 | 2 | 45.3  | 4.0  | 34.2 | 5.8  |
| chr19 | Pdcd4         | Upstream | N | 53965721  | 53966720  | 5 | 54.7  | 25.0 | 53.0 | 24.8 |
| chr14 | Il17rb        | Upstream | N | 30822083  | 30823082  | 3 | 25.9  | 3.7  | 28.2 | 0.0  |
| chr15 | Efr3a         | Upstream | N | 65617603  | 65618602  | 3 | 59.5  | 38.5 | 58.1 | 30.2 |
| chr4  | Rnu11         | Upstream | N | 131826102 | 131827101 | 3 | 53.6  | 9.6  | 54.5 | 26.7 |
| chr3  | Gbp2          | Upstream | N | 142282627 | 142283626 | 5 | 27.4  | 11.3 | 40.8 | 13.1 |
| chr19 | Tmem252       | Upstream | N | 24747498  | 24748497  | 5 | 74.1  | 6.0  | 45.5 | 17.9 |
| chr17 | Prr18         | Upstream | N | 8532271   | 8533270   | 5 | 90.5  | 63.7 | 68.3 | 40.7 |
| chr19 | C730002L08Rik | Upstream | N | 20626821  | 20627820  | 5 | 60.1  | 27.7 | 62.8 | 35.2 |
| chr4  | Pnrc2         | Upstream | N | 135429762 | 135430761 | 3 | 42.6  | 26.9 | 50.9 | 23.5 |
| chr13 | Nup153        | Upstream | N | 46823219  | 46824218  | 2 | 50.9  | 5.5  | 32.2 | 4.9  |
| chr2  | Rnf114        | Upstream | N | 167317145 | 167318144 | 1 | 61.5  | 23.8 | 56.0 | 28.8 |
| chr11 | Sectm1b       | Upstream | N | 120924884 | 120925883 | 5 | 75.6  | 32.0 | 56.4 | 29.3 |
| chr17 | Mep1a         | Upstream | N | 43639723  | 43640722  | 5 | 24.2  | 0.0  | 27.1 | 0.0  |
| chr16 | Ephb3         | Upstream | N | 21203868  | 21204867  | 3 | 29.8  | 6.1  | 33.1 | 6.0  |
| chr5  | Gbp6          | Upstream | N | 105722719 | 105723718 | 5 | 54.0  | 3.0  | 26.9 | 0.0  |
| chr12 | Gm5434        | Upstream | N | 36815966  | 36816965  | 5 | 55.1  | 38.2 | 70.2 | 43.5 |
| chr8  | Tmem192       | Upstream | N | 67470084  | 67471083  | 3 | 46.4  | 26.2 | 63.2 | 36.8 |
| chr1  | Nuak2         | Upstream | N | 134211702 | 134212701 | 3 | 73.1  | 57.1 | 98.3 | 72.0 |
| chr1  | Sp100         | Upstream | N | 87545625  | 87546624  | 5 | 46.3  | 28.0 | 53.1 | 26.8 |
| chr1  | BC055402      | Upstream | N | 57271841  | 57272840  | 5 | 66.1  | 21.5 | 58.1 | 32.2 |
| chr6  | Tuba3a        | Upstream | N | 125236061 | 125237060 | 3 | 94.7  | 66.0 | 96.8 | 70.9 |
| chr9  | Snrk          | Upstream | N | 122025384 | 122026383 | 3 | 51.4  | 12.9 | 38.1 | 12.3 |
| chr5  | Cldn15        | Upstream | N | 137442739 | 137443738 | 5 | 18.9  | 1.6  | 25.6 | 0.0  |
| chr8  | Ces5a         | Upstream | N | 96059608  | 96060607  | 5 | 48.9  | 31.7 | 54.0 | 28.5 |
| chr11 | Cobl          | Upstream | N | 12364964  | 12365963  | 1 | 67.3  | 40.5 | 80.5 | 55.1 |
| chr17 | Apobec2       | Upstream | N | 48572054  | 48573053  | 3 | 51.7  | 34.4 | 56.3 | 31.0 |
| chr11 | Ddc           | Upstream | N | 11798148  | 11799147  | 5 | 68.7  | 47.4 | 78.9 | 53.6 |
| chr8  | Fam89a        | Upstream | N | 127275710 | 127276709 | 1 | 78.1  | 47.7 | 75.8 | 50.7 |
| chr3  | Alpk1         | Upstream | N | 127483446 | 127484445 | 4 | 90.1  | 45.5 | 89.1 | 64.1 |
| chr18 | Gm9926        | Upstream | N | 66662832  | 66663831  | 5 | 68.3  | 24.9 | 40.8 | 15.8 |
| chr19 | Capn1         | Upstream | N | 6015826   | 6016825   | 4 | 33.0  | 9.1  | 34.8 | 9.9  |
| chr3  | 2010016I18Rik | Upstream | N | 106288832 | 106289831 | 5 | 42.9  | 17.1 | 35.1 | 10.3 |
| chr16 | Gm10791       | Upstream | N | 84971456  | 84972455  | 5 | 60.0  | 36.5 | 70.8 | 46.0 |
| chr8  | Mtmr7         | Upstream | N | 41720147  | 41721146  | 3 | 54.5  | 0.0  | 25.6 | 1.0  |
| chr14 | Ctsb          | Upstream | N | 63740299  | 63741298  | 4 | 73.3  | 55.4 | 46.3 | 21.7 |
| chr17 | Slc9a3r2      | Upstream | N | 24787251  | 24788250  | 3 | 44.2  | 10.8 | 39.0 | 14.5 |

|       |               |          |   |           |           |   |      |      |      |      |
|-------|---------------|----------|---|-----------|-----------|---|------|------|------|------|
| chr17 | Btnl6         | Upstream | N | 34654298  | 34655297  | 5 | 90.0 | 66.7 | 84.6 | 60.3 |
| chr4  | Al427809      | Upstream | N | 53283105  | 53284104  | 5 | 41.7 | 8.7  | 72.7 | 48.5 |
| chr11 | Tcn2          | Upstream | N | 3832082   | 3833081   | 6 | 43.7 | 28.7 | 24.4 | 0.3  |
| chr17 | Crip3         | Upstream | N | 46564891  | 46565890  | 5 | 83.3 | 53.6 | 71.1 | 47.1 |
| chr10 | Sumo3         | Upstream | N | 77067979  | 77068978  | 1 | 86.4 | 63.4 | 92.3 | 68.3 |
| chr12 | Kidins220     | Upstream | N | 25658797  | 25659796  | 4 | 55.4 | 35.4 | 60.0 | 36.1 |
| chr3  | 1700007F19Rik | Upstream | N | 57967730  | 57968729  | 5 | 49.3 | 6.4  | 39.6 | 15.8 |
| chr19 | Naaladl1      | Upstream | N | 6104798   | 6105797   | 5 | 86.3 | 26.0 | 51.1 | 27.5 |
| chr14 | Pcca          | Upstream | N | 122932550 | 122933549 | 3 | 17.9 | 1.0  | 26.8 | 3.4  |
| chr4  | Prdx1         | Upstream | N | 116357204 | 116358203 | 4 | 80.2 | 44.6 | 43.3 | 20.3 |
| chr11 | Olf332        | Upstream | N | 58306002  | 58307001  | 5 | 65.2 | 49.4 | 71.8 | 48.8 |
| chr13 | Zfp389        | Upstream | N | 21598394  | 21599393  | 4 | 68.0 | 31.0 | 50.0 | 27.1 |
| chr12 | Mir1193       | Upstream | N | 110952881 | 110953880 | 6 | 88.6 | 57.4 | 73.0 | 50.1 |
| chr12 | Mir679        | Upstream | N | 110952787 | 110953786 | 6 | 88.6 | 57.4 | 73.0 | 50.1 |
| chr9  | Olf884        | Upstream | N | 37853809  | 37854808  | 5 | 88.4 | 47.2 | 90.2 | 67.7 |
| chr15 | Mroh1         | Upstream | N | 76209943  | 76210942  | 3 | 83.7 | 42.9 | 69.4 | 47.0 |
| chr7  | Scgb1b27      | Upstream | N | 34805586  | 34806585  | 5 | 93.3 | 75.1 | 90.9 | 68.6 |
| chr16 | Slc15a2       | Upstream | N | 36785049  | 36786048  | 5 | 60.1 | 28.5 | 61.0 | 38.8 |
| chr19 | Lrrn4cl       | Upstream | N | 8924275   | 8925274   | 5 | 67.0 | 50.6 | 52.4 | 30.2 |
| chr1  | A230020J21Rik | Upstream | N | 192848230 | 192849229 | 2 | 40.5 | 17.1 | 45.3 | 23.2 |
| chr11 | Mir3064       | Upstream | N | 106644074 | 106645073 | 5 | 83.3 | 55.8 | 76.0 | 54.0 |
| chr10 | Mir1931       | Upstream | N | 92624530  | 92625529  | 3 | 41.7 | 25.3 | 44.5 | 22.6 |
| chr9  | Trak1         | Upstream | N | 121275076 | 121276075 | 5 | 60.9 | 40.6 | 61.9 | 40.1 |
| chr12 | Mir494        | Upstream | N | 110952528 | 110953527 | 5 | 88.6 | 38.1 | 75.8 | 54.0 |
| chr8  | Slc20a2       | Upstream | N | 23586172  | 23587171  | 2 | 44.5 | 17.2 | 51.4 | 29.7 |
| chr15 | Cyp11b1       | Upstream | N | 74672074  | 74673073  | 5 | 82.6 | 63.6 | 82.0 | 60.3 |
| chr15 | Apol7a        | Upstream | N | 77229541  | 77230540  | 5 | 51.6 | 7.8  | 29.9 | 8.3  |
| chr14 | Rft1          | Upstream | N | 31466561  | 31467560  | 4 | 91.7 | 58.7 | 81.5 | 59.8 |
| chr11 | Mir21         | Upstream | N | 86397661  | 86398660  | 5 | 23.3 | 2.7  | 21.6 | 0.0  |
| chr16 | Ppp1r2        | Upstream | N | 31275364  | 31276363  | 3 | 40.0 | 23.2 | 58.9 | 37.3 |
| chr14 | Pibf1         | Upstream | N | 99497652  | 99498651  | 4 | 57.5 | 36.7 | 57.5 | 35.9 |
| chr11 | Pik3ip1       | Upstream | N | 3229734   | 3230733   | 5 | 80.4 | 63.8 | 64.6 | 43.4 |
| chr2  | Defb29        | Upstream | N | 152365778 | 152366777 | 5 | 24.7 | 2.0  | 27.0 | 5.8  |
| chr11 | Tmem100       | Upstream | N | 89890662  | 89891661  | 5 | 53.9 | 31.2 | 51.2 | 30.2 |
| chr19 | Aldh1a1       | Upstream | N | 20675472  | 20676471  | 5 | 36.7 | 7.7  | 23.8 | 2.9  |
| chr4  | Serinc2       | Upstream | N | 129952831 | 129953830 | 3 | 69.7 | 44.8 | 73.7 | 53.0 |
| chr2  | Rbm45         | Upstream | N | 76207041  | 76208040  | 3 | 63.6 | 42.6 | 56.2 | 35.6 |
| chr1  | Slc26a9       | Upstream | N | 133639599 | 133640598 | 5 | 46.3 | 30.8 | 52.4 | 32.0 |
| chr6  | Mios          | Upstream | N | 8158227   | 8159226   | 3 | 73.7 | 57.3 | 72.4 | 52.1 |
| chr8  | Rasa3         | Upstream | N | 13677588  | 13678587  | 3 | 80.0 | 28.1 | 43.4 | 23.1 |
| chr17 | Rnf39         | Upstream | N | 37078996  | 37079995  | 2 | 53.7 | 28.3 | 51.0 | 30.7 |
| chr1  | Chit1         | Upstream | N | 136006819 | 136007818 | 5 | 46.6 | 6.5  | 34.8 | 14.7 |
| chr14 | Sftpd         | Upstream | N | 41998488  | 41999487  | 5 | 70.2 | 49.1 | 75.4 | 55.3 |
| chr8  | Nfat5         | Upstream | N | 109816370 | 109817369 | 2 | 58.1 | 35.3 | 74.5 | 54.5 |
| chr7  | Slc8a2        | Upstream | N | 16714649  | 16715648  | 3 | 19.5 | 2.9  | 22.6 | 2.7  |
| chr9  | Car12         | Upstream | N | 66560493  | 66561492  | 4 | 36.3 | 14.4 | 35.0 | 15.2 |
| chr1  | Pyhin1        | Upstream | N | 175559990 | 175560989 | 4 | 86.0 | 62.7 | 63.8 | 44.0 |
| chr15 | Csf2rb2       | Upstream | N | 78136034  | 78137033  | 5 | 76.7 | 41.8 | 57.9 | 38.1 |
| chr7  | Nsmce1        | Upstream | N | 132635057 | 132636056 | 2 | 55.4 | 14.3 | 44.2 | 24.5 |

|       |               |          |   |           |           |   |      |      |      |      |
|-------|---------------|----------|---|-----------|-----------|---|------|------|------|------|
| chr7  | Gramd1a       | Upstream | N | 31936070  | 31937069  | 1 | 55.4 | 40.2 | 51.6 | 31.9 |
| chr11 | Gm2a          | Upstream | N | 54910487  | 54911486  | 2 | 33.3 | 11.7 | 25.5 | 5.9  |
| chr5  | Cd38          | Upstream | N | 44259066  | 44260065  | 5 | 72.9 | 57.5 | 80.7 | 61.2 |
| chr12 | Mir453        | Upstream | N | 110972829 | 110973828 | 5 | 77.3 | 41.5 | 86.7 | 67.1 |
| chr14 | Itih1         | Upstream | N | 31756476  | 31757475  | 5 | 76.8 | 43.3 | 40.0 | 20.4 |
| chr4  | Snhg3         | Upstream | N | 131909602 | 131910601 | 4 | 73.5 | 45.3 | 71.1 | 51.5 |
| chr11 | Hoxb4         | Upstream | N | 96178581  | 96179580  | 3 | 57.1 | 33.1 | 54.9 | 35.3 |
| chr4  | Pde4b         | Upstream | N | 101926544 | 101927543 | 6 | 39.0 | 4.0  | 23.6 | 4.1  |
| chr13 | Slc35b3       | Upstream | N | 39052745  | 39053744  | 4 | 24.5 | 3.5  | 19.4 | 0.0  |
| chr9  | E030011O05Rik | Upstream | N | 96653251  | 96654250  | 5 | 95.2 | 62.2 | 68.2 | 49.0 |
| chr11 | lba57         | Upstream | N | 58977248  | 58978247  | 3 | 86.4 | 59.3 | 80.1 | 60.9 |
| chr5  | Ppargc1a      | Upstream | N | 51945161  | 51946160  | 5 | 48.2 | 27.7 | 41.2 | 22.0 |
| chr10 | Hddc2         | Upstream | N | 31032211  | 31033210  | 3 | 26.1 | 4.5  | 22.8 | 3.6  |
| chr1  | 5033404E19Rik | Upstream | N | 187320185 | 187321184 | 5 | 65.4 | 45.8 | 63.1 | 44.0 |
| chr18 | Gm4841        | Upstream | N | 60432922  | 60433921  | 5 | 85.3 | 51.4 | 62.3 | 43.2 |
| chr12 | Gpx2          | Upstream | N | 77896542  | 77897541  | 5 | 27.9 | 10.0 | 65.8 | 46.7 |
| chr7  | Sycn          | Upstream | N | 29324904  | 29325903  | 5 | 31.8 | 16.6 | 43.1 | 24.2 |
| chr15 | Pus7l         | Upstream | N | 94373939  | 94374938  | 1 | 59.7 | 24.1 | 50.5 | 31.8 |
| chr16 | Tctex1d2      | Upstream | N | 32418788  | 32419787  | 4 | 69.5 | 52.2 | 83.3 | 64.7 |
| chr17 | BC004004      | Upstream | N | 29404733  | 29405732  | 4 | 67.5 | 42.5 | 36.1 | 17.5 |
| chr1  | Kcnb2         | Upstream | N | 15301533  | 15302532  | 5 | 91.0 | 68.2 | 85.2 | 66.7 |
| chr17 | 9830107B12Rik | Upstream | N | 48283258  | 48284257  | 5 | 81.9 | 60.3 | 66.7 | 48.1 |
| chr8  | Mir1969       | Upstream | N | 73448424  | 73449423  | 5 | 89.5 | 69.7 | 84.6 | 66.1 |
| chr10 | Ccdc170       | Upstream | N | 5836670   | 5837669   | 5 | 53.8 | 20.3 | 48.2 | 29.7 |
| chr17 | Slc44a4       | Upstream | N | 35050411  | 35051410  | 5 | 60.7 | 9.5  | 52.8 | 34.3 |
| chr12 | Mir1936       | Upstream | N | 103923231 | 103924230 | 5 | 45.0 | 18.7 | 42.2 | 23.9 |
| chr19 | Fas           | Upstream | N | 34364149  | 34365148  | 4 | 44.4 | 14.6 | 40.8 | 22.5 |
| chr1  | Apcs          | Upstream | N | 174825186 | 174826185 | 5 | 78.5 | 59.5 | 67.1 | 48.9 |
| chr5  | Rabl5         | Upstream | N | 137383020 | 137384019 | 4 | 84.0 | 58.3 | 72.0 | 53.8 |
| chr3  | 4930564D02Rik | Upstream | N | 104868762 | 104869761 | 5 | 66.5 | 48.6 | 72.0 | 53.8 |
| chr10 | Plekhg1       | Upstream | N | 6606165   | 6607164   | 4 | 32.8 | 7.2  | 30.4 | 12.2 |
| chr10 | Chpt1         | Upstream | N | 87966716  | 87967715  | 2 | 39.0 | 15.4 | 43.9 | 25.7 |
| chr5  | 1700027F09Rik | Upstream | N | 64859182  | 64860181  | 5 | 68.0 | 44.2 | 62.6 | 44.5 |
| chr6  | Setmar        | Upstream | N | 108014039 | 108015038 | 5 | 37.7 | 19.7 | 21.0 | 2.9  |
| chr12 | Mir3070b      | Upstream | N | 110825802 | 110826801 | 5 | 80.5 | 53.0 | 75.8 | 57.8 |
| chr11 | Wdr81         | Upstream | N | 75268220  | 75269219  | 4 | 36.4 | 17.7 | 34.9 | 16.9 |
| chr10 | Avil          | Upstream | N | 126436765 | 126437764 | 5 | 87.5 | 62.8 | 73.7 | 55.8 |
| chr11 | Mir196a-1     | Upstream | N | 96125478  | 96126477  | 5 | 31.2 | 0.9  | 19.1 | 1.2  |
| chr2  | Nutm1         | Upstream | N | 112099449 | 112100448 | 5 | 66.7 | 49.0 | 69.9 | 52.0 |
| chr7  | Ap3b2         | Upstream | N | 88638812  | 88639811  | 4 | 74.5 | 55.7 | 86.7 | 69.1 |
| chr13 | Rfesd         | Upstream | N | 76156161  | 76157160  | 4 | 68.0 | 43.6 | 81.9 | 64.3 |
| chr11 | Krt17         | Upstream | N | 100122304 | 100123303 | 5 | 70.3 | 51.3 | 68.3 | 50.7 |
| chr11 | Gm12298       | Upstream | N | 66760589  | 66761588  | 5 | 59.2 | 7.1  | 58.3 | 40.7 |
| chr11 | 2210015D19Rik | Upstream | N | 5661153   | 5662152   | 3 | 31.7 | 13.6 | 31.2 | 13.7 |
| chr10 | Col6a1        | Upstream | N | 76188790  | 76189789  | 5 | 95.8 | 32.1 | 50.5 | 32.9 |
| chr14 | Prss52        | Upstream | N | 64722160  | 64723159  | 5 | 82.0 | 63.0 | 81.6 | 64.1 |
| chr17 | Gm9705        | Upstream | N | 32757264  | 32758263  | 5 | 69.9 | 40.1 | 76.9 | 59.5 |
| chr6  | Gm8579        | Upstream | N | 3237519   | 3238518   | 5 | 73.9 | 49.4 | 76.0 | 58.7 |
| chr2  | Upp2          | Upstream | N | 58606596  | 58607595  | 5 | 62.2 | 32.8 | 43.9 | 26.5 |

|       |               |          |   |           |           |   |      |      |      |      |
|-------|---------------|----------|---|-----------|-----------|---|------|------|------|------|
| chr2  | Srxn1         | Upstream | N | 151930260 | 151931259 | 2 | 51.4 | 16.7 | 32.4 | 15.0 |
| chr12 | Pacs2         | Upstream | N | 114251719 | 114252718 | 1 | 48.0 | 25.4 | 53.3 | 36.1 |
| chr8  | Snx20         | Upstream | N | 91160028  | 91161027  | 5 | 73.2 | 51.8 | 78.8 | 61.6 |
| chr5  | Hspb8         | Upstream | N | 116872874 | 116873873 | 5 | 37.2 | 18.2 | 23.9 | 6.8  |
| chr16 | Chodl         | Upstream | N | 78930193  | 78931192  | 4 | 64.2 | 45.8 | 51.3 | 34.3 |
| chr4  | Mir200a       | Upstream | N | 155429095 | 155430094 | 6 | 24.1 | 1.0  | 17.4 | 0.4  |
| chr5  | Gsap          | Upstream | N | 20691085  | 20692084  | 3 | 61.7 | 40.4 | 60.4 | 43.5 |
| chr10 | Nedd1         | Upstream | N | 92185164  | 92186163  | 3 | 64.6 | 29.2 | 40.7 | 23.9 |
| chr11 | Purb          | Upstream | N | 6376080   | 6377079   | 3 | 38.3 | 1.9  | 55.8 | 39.0 |
| chr18 | Zfp474        | Upstream | N | 52774569  | 52775568  | 5 | 81.6 | 50.6 | 72.3 | 55.6 |
| chr7  | Trim21        | Upstream | N | 109713984 | 109714983 | 5 | 62.4 | 47.1 | 61.5 | 44.8 |
| chr7  | Fut1          | Upstream | N | 52871976  | 52872975  | 2 | 52.4 | 32.3 | 50.7 | 34.2 |
| chr11 | Pex12         | Upstream | N | 83112480  | 83113479  | 3 | 83.5 | 66.7 | 65.3 | 48.8 |
| chr2  | AU019990      | Upstream | N | 132422932 | 132423931 | 5 | 87.4 | 71.7 | 91.1 | 74.5 |
| chr2  | Lmo2          | Upstream | N | 103797152 | 103798151 | 5 | 75.4 | 57.7 | 62.2 | 45.7 |
| chr10 | Rdh1          | Upstream | N | 127195819 | 127196818 | 5 | 32.3 | 15.6 | 31.9 | 15.5 |
| chr19 | Tut1          | Upstream | N | 9027340   | 9028339   | 3 | 58.6 | 43.0 | 60.0 | 43.7 |
| chr11 | Snord1a       | Upstream | N | 116534911 | 116535910 | 5 | 47.2 | 26.6 | 48.8 | 32.5 |
| chr11 | Alox8         | Upstream | N | 69011346  | 69012345  | 5 | 75.9 | 49.9 | 59.8 | 43.6 |
| chr19 | Dagla         | Upstream | N | 10379368  | 10380367  | 1 | 53.2 | 32.6 | 56.5 | 40.3 |
| chr13 | Wdr41         | Upstream | N | 95745299  | 95746298  | 3 | 31.0 | 6.3  | 17.6 | 1.5  |
| chr12 | Sdc1          | Upstream | N | 8777202   | 8778201   | 2 | 65.1 | 46.1 | 60.5 | 44.5 |
| chr18 | Atp5a1        | Upstream | N | 78011507  | 78012506  | 4 | 90.5 | 68.7 | 76.0 | 60.0 |
| chr18 | Dsc2          | Upstream | N | 20218007  | 20219006  | 5 | 26.2 | 8.8  | 17.8 | 1.8  |
| chr9  | Cdcp1         | Upstream | N | 123125157 | 123126156 | 4 | 64.7 | 24.2 | 64.8 | 49.0 |
| chr15 | 1700011A15Rik | Upstream | N | 101277176 | 101278175 | 5 | 70.8 | 51.5 | 69.2 | 53.5 |
| chr11 | Gm16515       | Upstream | N | 60727295  | 60728294  | 2 | 40.7 | 23.1 | 41.5 | 25.8 |
| chr13 | Vmn1r202      | Upstream | N | 22594115  | 22595114  | 5 | 83.8 | 64.2 | 83.3 | 67.6 |
| chr7  | Prss8         | Upstream | N | 135073628 | 135074627 | 5 | 22.4 | 3.2  | 19.6 | 3.9  |
| chr2  | Psd4          | Upstream | N | 24239917  | 24240916  | 5 | 23.4 | 6.4  | 23.4 | 7.8  |
| chr18 | Dnajc18       | Upstream | N | 35862799  | 35863798  | 3 | 76.9 | 55.2 | 66.1 | 50.5 |
| chr4  | Gm13037       | Upstream | N | 141537907 | 141538906 | 5 | 36.6 | 16.8 | 32.1 | 16.5 |
| chr2  | Sardh         | Upstream | N | 27102824  | 27103823  | 5 | 25.0 | 2.2  | 37.6 | 22.1 |
| chr17 | Gm8363        | Upstream | N | 5483070   | 5484069   | 5 | 32.0 | 5.3  | 26.9 | 11.4 |
| chr17 | Sult1c2       | Upstream | N | 53985284  | 53986283  | 5 | 63.6 | 20.4 | 31.1 | 15.7 |
| chr7  | Sec11a        | Upstream | N | 88092437  | 88093436  | 2 | 16.7 | 0.0  | 15.4 | 0.0  |
| chr4  | Tnfrsf18      | Upstream | N | 155399451 | 155400450 | 5 | 66.8 | 49.1 | 61.8 | 46.5 |
| chr5  | Plb1          | Upstream | N | 32654953  | 32655952  | 5 | 81.3 | 59.8 | 83.5 | 68.1 |
| chr4  | Luzp1         | Upstream | N | 136024676 | 136025675 | 3 | 21.3 | 6.1  | 19.1 | 3.8  |
| chr5  | Lrrc17        | Upstream | N | 21048345  | 21049344  | 5 | 92.6 | 34.0 | 60.6 | 45.3 |
| chr8  | Spcs3         | Upstream | N | 55615352  | 55616351  | 3 | 53.6 | 27.6 | 41.9 | 26.8 |
| chr11 | Hoxb5         | Upstream | N | 96163826  | 96164825  | 2 | 73.4 | 38.4 | 57.0 | 41.9 |
| chr12 | Zfp410        | Upstream | N | 85656809  | 85657808  | 3 | 39.2 | 16.7 | 36.4 | 21.3 |
| chr10 | Utrn          | Upstream | N | 12581534  | 12582533  | 5 | 77.9 | 42.4 | 59.3 | 44.3 |

**Group 8-mDMR genes associated with methylation loss at gene body and 3' non-CGI**

| Chrom | Gene | Region | CGI | Start | End | #Bins | DNA Methylation Level (%) |     |             |     |
|-------|------|--------|-----|-------|-----|-------|---------------------------|-----|-------------|-----|
|       |      |        |     |       |     |       | ISCs                      |     | Diff. Cells |     |
|       |      |        |     |       |     |       | P0                        | P21 | P0          | P21 |

|       |               |       |   |           |           |    |      |      |       |      |
|-------|---------------|-------|---|-----------|-----------|----|------|------|-------|------|
| chr11 | 4933402P03Rik | 3-UTR | N | 69630068  | 69630127  | 1  | 49.3 | 0.0  | 59.4  | 1.6  |
| chr5  | Sel1l3        | 3-UTR | N | 53498322  | 53499273  | 5  | 80.0 | 22.9 | 82.9  | 29.2 |
| chr4  | Al464131      | 3-UTR | N | 41442634  | 41444510  | 8  | 87.0 | 37.7 | 89.7  | 37.2 |
| chr3  | 4930425O10Rik | 3-UTR | N | 138374499 | 138375636 | 6  | 88.9 | 64.6 | 87.3  | 36.5 |
| chr3  | Arl14         | 3-UTR | N | 69027023  | 69027540  | 3  | 71.2 | 16.5 | 75.7  | 25.1 |
| chr17 | Fsd1          | 3-UTR | N | 56136176  | 56136304  | 2  | 88.9 | 45.8 | 89.7  | 40.6 |
| chr1  | Cnot11        | 3-UTR | N | 39602112  | 39603722  | 8  | 92.0 | 46.0 | 70.2  | 22.4 |
| chr17 | Wdr90         | 3-UTR | N | 25981679  | 25982012  | 3  | 55.1 | 17.2 | 66.3  | 18.7 |
| chr2  | Trib3         | 3-UTR | N | 152163161 | 152163942 | 4  | 40.1 | 9.4  | 51.6  | 5.3  |
| chr9  | Cxcr5         | 3-UTR | N | 44319870  | 44321316  | 7  | 77.6 | 39.7 | 77.2  | 31.9 |
| chr3  | Trim46        | 3-UTR | N | 89038099  | 89038820  | 4  | 58.4 | 33.2 | 68.5  | 23.7 |
| chr11 | 1700003D09Rik | 3-UTR | N | 98212032  | 98213308  | 6  | 57.4 | 9.9  | 52.1  | 9.1  |
| chr1  | Lefty2        | 3-UTR | N | 182827945 | 182829233 | 6  | 62.5 | 25.6 | 61.7  | 19.9 |
| chr10 | Socs2         | 3-UTR | N | 94874124  | 94875286  | 6  | 74.0 | 29.0 | 63.8  | 22.7 |
| chr10 | Txlnb         | 3-UTR | N | 17563287  | 17565469  | 10 | 67.1 | 48.8 | 63.6  | 23.5 |
| chr19 | Tmem223       | 3-UTR | N | 8846831   | 8846965   | 2  | 78.6 | 27.5 | 75.0  | 35.2 |
| chr8  | Cul4a         | 3-UTR | N | 13146628  | 13147939  | 6  | 59.3 | 16.5 | 60.8  | 21.3 |
| chr11 | Usp43         | 3-UTR | N | 67668025  | 67668982  | 5  | 98.1 | 73.5 | 76.2  | 36.7 |
| chr15 | Krt8          | 3-UTR | N | 101827142 | 101827370 | 1  | 39.4 | 19.4 | 54.2  | 15.5 |
| chr12 | Kcns3         | 3-UTR | N | 11097008  | 11098026  | 5  | 95.7 | 77.1 | 100.0 | 61.9 |
| chr4  | D830031N03Rik | 3-UTR | N | 123080844 | 123084602 | 19 | 82.5 | 29.6 | 62.9  | 25.0 |
| chr4  | Mpl           | 3-UTR | N | 118115022 | 118116033 | 5  | 60.5 | 39.5 | 65.0  | 27.1 |
| chr8  | Hook2         | 3-UTR | N | 87526911  | 87527263  | 2  | 91.4 | 70.4 | 77.8  | 40.0 |
| chr11 | Sap30bp       | 3-UTR | N | 115825707 | 115826848 | 6  | 67.3 | 30.0 | 57.6  | 20.8 |
| chr15 | Myc           | 3-UTR | N | 61821464  | 61821916  | 2  | 74.6 | 27.8 | 79.4  | 42.9 |
| chr14 | Fam160b2      | 3-UTR | N | 70983102  | 70984851  | 8  | 86.4 | 36.5 | 84.5  | 48.3 |
| chr7  | Cars          | 3-UTR | N | 150743135 | 150743776 | 3  | 97.1 | 79.3 | 67.7  | 31.6 |
| chr1  | Tnni1         | 3-UTR | N | 137706311 | 137707566 | 6  | 50.6 | 9.5  | 56.3  | 20.5 |
| chr17 | Cdsn          | 3-UTR | N | 35693207  | 35694125  | 5  | 47.7 | 10.1 | 44.9  | 9.3  |
| chr3  | Tifa          | 3-UTR | N | 127500055 | 127501307 | 6  | 77.1 | 8.9  | 78.7  | 43.3 |
| chr17 | Fam195a       | 3-UTR | N | 26000643  | 26000913  | 1  | 45.7 | 28.8 | 56.4  | 21.3 |
| chr6  | 1700101I11Rik | 3-UTR | N | 129482202 | 129482960 | 5  | 60.4 | 29.6 | 40.1  | 5.2  |
| chr7  | Slx1b         | 3-UTR | N | 133832441 | 133835139 | 14 | 83.5 | 63.2 | 86.8  | 52.1 |
| chr4  | Hcrr1         | 3-UTR | N | 129807461 | 129808084 | 3  | 66.6 | 19.6 | 57.4  | 23.1 |
| chr12 | Arl4a         | 3-UTR | N | 40759878  | 40762730  | 12 | 44.8 | 9.2  | 33.9  | 0.0  |
| chr19 | Ifit3         | 3-UTR | N | 34662758  | 34663472  | 4  | 87.0 | 32.0 | 74.5  | 40.6 |
| chr17 | Wdr46         | 3-UTR | N | 34086361  | 34086640  | 2  | 51.3 | 19.4 | 52.4  | 18.9 |
| chr11 | Ramp3         | 3-UTR | N | 6576742   | 6577478   | 4  | 50.1 | 4.9  | 63.1  | 30.3 |
| chr6  | 2310001H17Rik | 3-UTR | N | 129182641 | 129182965 | 2  | 20.7 | 4.8  | 35.7  | 2.9  |
| chr12 | Cfl2          | 3-UTR | N | 55959806  | 55962111  | 12 | 70.5 | 44.2 | 90.3  | 57.8 |
| chr1  | Pm20d1        | 3-UTR | N | 133712688 | 133714692 | 10 | 76.3 | 53.8 | 83.6  | 51.1 |
| chr17 | Ntn3          | 3-UTR | N | 24340791  | 24343542  | 5  | 53.7 | 34.0 | 60.9  | 28.6 |
| chr11 | Rasd1         | 3-UTR | N | 59776685  | 59777311  | 2  | 68.9 | 36.1 | 59.9  | 27.6 |
| chr9  | Bco2          | 3-UTR | N | 50341192  | 50341510  | 2  | 21.1 | 0.0  | 46.0  | 14.1 |
| chr3  | Impa1         | 3-UTR | N | 10313540  | 10315185  | 8  | 82.9 | 0.7  | 76.6  | 44.8 |
| chr9  | Oxsr1         | 3-UTR | N | 119147551 | 119150259 | 14 | 67.1 | 34.2 | 77.9  | 46.5 |
| chr5  | 5830416I19Rik | 3-UTR | N | 64438901  | 64441465  | 13 | 51.9 | 33.4 | 62.5  | 31.8 |
| chr4  | Tspan1        | 3-UTR | N | 115834486 | 115835592 | 6  | 77.4 | 30.2 | 76.2  | 45.6 |
| chr17 | Tbl3          | 3-UTR | N | 24837598  | 24837617  | 1  | 76.8 | 55.8 | 72.3  | 42.5 |

|       |               |       |   |           |           |    |       |      |      |      |
|-------|---------------|-------|---|-----------|-----------|----|-------|------|------|------|
| chr9  | Ccr5          | 3-UTR | N | 124040166 | 124041922 | 9  | 33.8  | 18.0 | 46.5 | 16.8 |
| chr3  | Dclre1b       | 3-UTR | N | 103604528 | 103606890 | 13 | 61.1  | 3.0  | 60.3 | 30.7 |
| chr7  | Pwyp2b        | 3-UTR | N | 146452385 | 146453152 | 4  | 41.1  | 22.1 | 57.5 | 27.9 |
| chr6  | B230319C09Rik | 3-UTR | N | 83397070  | 83398316  | 6  | 95.7  | 69.1 | 94.1 | 64.7 |
| chr11 | Hoxb4         | 3-UTR | N | 96181643  | 96182952  | 4  | 44.7  | 28.0 | 68.1 | 38.9 |
| chr18 | Atg12         | 3-UTR | N | 46892071  | 46894103  | 10 | 49.7  | 34.1 | 58.8 | 29.9 |
| chr9  | Rasgrf1       | 3-UTR | N | 89921602  | 89921817  | 1  | 46.0  | 23.0 | 57.2 | 29.4 |
| chr17 | Gpank1        | 3-UTR | N | 35261610  | 35261760  | 1  | 36.6  | 2.2  | 34.6 | 7.2  |
| chr7  | Ifitm3        | 3-UTR | N | 148195489 | 148195623 | 1  | 77.7  | 53.2 | 82.1 | 54.8 |
| chr11 | Eif1          | 3-UTR | N | 100182676 | 100183410 | 4  | 42.5  | 4.1  | 36.4 | 9.2  |
| chr17 | Ehmt2         | 3-UTR | N | 35050766  | 35050992  | 2  | 29.2  | 9.5  | 58.7 | 31.5 |
| chr9  | Cox5a         | 3-UTR | N | 57379590  | 57380233  | 3  | 18.0  | 0.0  | 44.8 | 18.1 |
| chr7  | Ppfibp2       | 3-UTR | N | 114891112 | 114892097 | 6  | 81.3  | 55.2 | 75.4 | 49.0 |
| chr14 | Lrrc18        | 3-UTR | N | 33827036  | 33828478  | 6  | 58.2  | 22.8 | 62.6 | 36.3 |
| chr1  | Kcne4         | 3-UTR | N | 78814725  | 78816600  | 9  | 39.2  | 13.4 | 55.2 | 29.2 |
| chr2  | 4930500J02Rik | 3-UTR | N | 104411352 | 104411586 | 1  | 19.1  | 0.0  | 27.4 | 1.4  |
| chr6  | Clec9a        | 3-UTR | N | 129372450 | 129374782 | 12 | 57.0  | 11.7 | 43.7 | 17.9 |
| chr14 | Atg14         | 3-UTR | N | 48160568  | 48162511  | 10 | 73.5  | 44.5 | 77.4 | 51.6 |
| chr17 | Noxo1         | 3-UTR | N | 24837301  | 24837474  | 2  | 20.0  | 1.8  | 26.6 | 1.0  |
| chr4  | 2410114N07Rik | 3-UTR | N | 34857038  | 34857857  | 4  | 78.4  | 62.3 | 81.2 | 56.0 |
| chr6  | Usp5          | 3-UTR | N | 124765037 | 124765583 | 3  | 34.1  | 1.9  | 41.2 | 16.2 |
| chr4  | Slc44a1       | 3-UTR | N | 53634482  | 53635350  | 4  | 89.8  | 33.5 | 65.5 | 41.1 |
| chr6  | Gadd45a       | 3-UTR | N | 66985090  | 66985652  | 4  | 35.1  | 6.0  | 33.9 | 9.6  |
| chr15 | Ccdc134       | 3-UTR | N | 81971422  | 81972632  | 6  | 75.3  | 53.4 | 82.0 | 58.4 |
| chr8  | Defa-ps12     | 3-UTR | N | 19212659  | 19212760  | 1  | 78.6  | 50.0 | 70.4 | 47.4 |
| chr15 | Zfp572        | 3-UTR | N | 59142493  | 59143568  | 5  | 96.8  | 67.2 | 89.0 | 66.4 |
| chr12 | Gpx2          | 3-UTR | N | 77893322  | 77893636  | 2  | 91.3  | 73.0 | 93.0 | 70.5 |
| chr9  | 4833428L15Rik | 3-UTR | N | 45224709  | 45225478  | 4  | 63.7  | 44.0 | 71.2 | 49.0 |
| chr2  | Ada           | 3-UTR | N | 163552307 | 163553295 | 5  | 47.2  | 2.0  | 43.7 | 21.6 |
| chr1  | Gls           | 3-UTR | N | 52220294  | 52223001  | 14 | 100.0 | 70.6 | 91.0 | 69.2 |
| chr1  | D630023F18Rik | 3-UTR | N | 65153887  | 65155270  | 7  | 97.0  | 80.0 | 93.8 | 72.2 |
| chr19 | Pitpnm1       | 3-UTR | N | 4113485   | 4113965   | 3  | 32.0  | 0.0  | 30.8 | 9.4  |
| chr6  | H2afj         | 3-UTR | N | 136757251 | 136758595 | 3  | 42.4  | 12.5 | 26.7 | 5.5  |
| chr9  | AI593442      | 3-UTR | N | 52481147  | 52485780  | 19 | 38.4  | 11.9 | 48.1 | 26.9 |
| chr11 | 4933422H20Rik | 3-UTR | N | 115309535 | 115309582 | 2  | 74.3  | 18.8 | 59.6 | 38.4 |
| chr5  | Htt           | 3-UTR | N | 35251495  | 35255170  | 18 | 90.7  | 58.0 | 79.2 | 58.2 |
| chr17 | Gm16197       | 3-UTR | N | 29194419  | 29197303  | 14 | 87.6  | 59.2 | 83.4 | 62.6 |
| chr4  | Hrct1         | 3-UTR | N | 43740564  | 43740982  | 2  | 75.6  | 60.4 | 68.9 | 48.2 |
| chr7  | E230029C05Rik | 3-UTR | N | 97186459  | 97188790  | 12 | 79.2  | 57.1 | 80.2 | 59.6 |
| chr11 | Aatf          | 3-UTR | N | 84236358  | 84236457  | 1  | 31.8  | 6.7  | 28.3 | 8.0  |
| chr1  | A130010J15Rik | 3-UTR | N | 195001328 | 195004026 | 14 | 85.3  | 66.3 | 74.2 | 54.1 |
| chr5  | 3110082I17Rik | 3-UTR | N | 139835693 | 139836498 | 4  | 53.3  | 34.8 | 48.9 | 29.0 |
| chr10 | Rps26         | 3-UTR | N | 128061585 | 128061656 | 1  | 93.3  | 76.6 | 97.9 | 78.1 |
| chr13 | Dmgdh         | 3-UTR | N | 94522421  | 94522778  | 2  | 23.1  | 2.4  | 54.4 | 34.7 |
| chr2  | F830045P16Rik | 3-UTR | N | 129284095 | 129285028 | 5  | 85.0  | 28.6 | 86.3 | 66.7 |
| chr3  | Mme           | 3-UTR | N | 63184255  | 63186153  | 9  | 76.5  | 45.7 | 76.8 | 57.5 |
| chr4  | Gpatch3       | 3-UTR | N | 133139748 | 133140157 | 1  | 33.3  | 15.0 | 30.8 | 11.8 |
| chr2  | Pmpca         | 3-UTR | N | 26251109  | 26252641  | 8  | 96.7  | 37.0 | 75.4 | 56.7 |
| chr15 | Rpl37         | 3-UTR | N | 5068637   | 5069140   | 4  | 87.0  | 64.0 | 77.1 | 58.8 |



|       |               |            |   |           |           |    |       |      |       |      |
|-------|---------------|------------|---|-----------|-----------|----|-------|------|-------|------|
| chr9  | Kank2         | 3-UTR      | N | 21571217  | 21573394  | 11 | 72.6  | 56.4 | 68.2  | 49.9 |
| chr2  | Astl          | 3-UTR      | N | 127182511 | 127183387 | 4  | 88.3  | 43.2 | 70.8  | 52.6 |
| chr13 | 2310005E17Rik | 3-UTR      | N | 99194065  | 99194871  | 4  | 20.2  | 2.9  | 21.4  | 3.3  |
| chr4  | Gnb1          | 3-UTR      | N | 154931387 | 154933378 | 10 | 73.6  | 55.5 | 76.2  | 58.1 |
| chr11 | Map3k14       | 3-UTR      | N | 103081078 | 103082338 | 6  | 75.2  | 50.6 | 67.0  | 49.0 |
| chr9  | Msl2          | 3-UTR      | N | 101004493 | 101007129 | 13 | 83.8  | 48.2 | 71.6  | 53.7 |
| chr11 | 5730522E02Rik | 3-UTR      | N | 25516846  | 25517872  | 5  | 94.7  | 76.4 | 94.9  | 77.3 |
| chr10 | Hs3st5        | 3-UTR      | N | 36553318  | 36554200  | 4  | 100.0 | 67.2 | 93.2  | 75.6 |
| chr2  | Inpp5e        | 3-UTR      | N | 26251769  | 26253358  | 8  | 89.7  | 46.0 | 73.3  | 56.0 |
| chr16 | Hmgn1         | 3-UTR      | N | 96343195  | 96343982  | 4  | 89.2  | 69.2 | 88.8  | 71.6 |
| chr3  | Dennd2d       | 3-UTR      | N | 106303525 | 106305948 | 13 | 91.0  | 74.9 | 87.2  | 70.2 |
| chr14 | Adam28        | 3-UTR      | N | 69223055  | 69224631  | 8  | 87.2  | 61.6 | 77.9  | 60.8 |
| chr7  | Crebzf        | 3-UTR      | N | 97592602  | 97596553  | 18 | 59.1  | 24.8 | 40.7  | 24.0 |
| chr7  | B230206H07Rik | 3-UTR      | N | 148545077 | 148547935 | 12 | 86.6  | 64.6 | 92.9  | 76.1 |
| chr9  | 1700104A03Rik | 3-UTR      | N | 54116387  | 54117050  | 3  | 96.2  | 77.1 | 80.8  | 64.0 |
| chr7  | Pycard        | 3-UTR      | N | 135134887 | 135136225 | 7  | 65.2  | 37.2 | 45.8  | 29.1 |
| chr15 | Trmt12        | 3-UTR      | N | 58705651  | 58708336  | 13 | 86.0  | 63.8 | 81.6  | 65.0 |
| chr14 | Mdp1          | 3-UTR      | N | 56276716  | 56277819  | 6  | 39.7  | 23.6 | 37.5  | 21.2 |
| chr5  | Igfbp7        | 3-UTR      | N | 77778265  | 77778504  | 2  | 65.3  | 42.9 | 76.5  | 60.4 |
| chr14 | Slc39a2       | 3-UTR      | N | 52515207  | 52516420  | 6  | 36.7  | 13.9 | 40.2  | 24.2 |
| chr16 | 1810007I06Rik | 3-UTR      | N | 13739404  | 13739564  | 1  | 34.0  | 15.4 | 29.6  | 13.6 |
| chr8  | Slc18a1       | 3-UTR      | N | 71561607  | 71562693  | 5  | 35.0  | 14.1 | 40.7  | 24.8 |
| chr12 | 2410004P03Rik | 3-UTR      | N | 17011764  | 17012621  | 5  | 92.1  | 71.1 | 94.4  | 78.6 |
| chr4  | E130308A19Rik | 3-UTR      | N | 59765912  | 59767175  | 6  | 92.1  | 53.1 | 84.4  | 68.6 |
| chr8  | Retn          | 3-UTR      | N | 3657387   | 3659818   | 13 | 64.8  | 41.1 | 73.6  | 57.9 |
| chr11 | Hoxb5         | 3-UTR      | N | 96166452  | 96167435  | 4  | 78.6  | 46.7 | 52.7  | 37.0 |
| chr4  | Uts2          | 3-UTR      | N | 150375790 | 150375919 | 1  | 77.2  | 56.1 | 75.9  | 60.2 |
| chr4  | Mxra8         | 3-UTR      | N | 155217440 | 155218211 | 4  | 87.7  | 48.4 | 83.5  | 67.9 |
| chr6  | Ube2h         | 3-UTR      | N | 30161289  | 30164958  | 18 | 75.8  | 44.5 | 74.9  | 59.7 |
| chr4  | Gm13032       | 3-UTR      | N | 140372611 | 140373426 | 4  | 84.0  | 47.4 | 72.5  | 57.3 |
| chr3  | Setd7         | 3-UTR      | N | 51319240  | 51325228  | 30 | 63.1  | 40.6 | 55.7  | 40.6 |
| chr13 | F2rl2         | 3-UTR      | N | 96471514  | 96472723  | 6  | 63.4  | 36.6 | 74.3  | 59.3 |
| chr11 | Sun3          | Downstrear | N | 8915057   | 8916056   | 5  | 95.2  | 69.5 | 89.3  | 20.3 |
| chr9  | Gm10684       | Downstrear | N | 44914259  | 44915258  | 5  | 94.4  | 5.0  | 87.0  | 26.1 |
| chr4  | Zc3h12a       | Downstrear | N | 124794658 | 124795657 | 5  | 68.0  | 7.8  | 69.6  | 10.4 |
| chr16 | Mir3081       | Downstrear | N | 44557159  | 44558158  | 3  | 28.1  | 2.1  | 55.7  | 0.7  |
| chr9  | Gm19299       | Downstrear | N | 67011596  | 67012595  | 5  | 61.7  | 4.1  | 73.2  | 18.8 |
| chr2  | Pkig          | Downstrear | N | 163551895 | 163552894 | 6  | 41.7  | 2.6  | 56.7  | 2.7  |
| chr17 | Stap2         | Downstrear | N | 56135499  | 56136498  | 5  | 88.9  | 16.5 | 67.5  | 14.6 |
| chr3  | 4933431E20Rik | Downstrear | N | 107690768 | 107691767 | 5  | 65.1  | 44.2 | 81.4  | 28.6 |
| chr9  | Cmtm8         | Downstrear | N | 114697463 | 114698462 | 5  | 58.1  | 12.5 | 78.8  | 26.5 |
| chr13 | 4930401O12Rik | Downstrear | N | 31304279  | 31305278  | 5  | 88.0  | 53.3 | 77.1  | 25.0 |
| chr14 | Scel          | Downstrear | N | 104012564 | 104013563 | 3  | 97.6  | 61.6 | 100.0 | 48.0 |
| chr8  | Med26         | Downstrear | N | 75017458  | 75018457  | 6  | 76.6  | 46.4 | 54.5  | 3.7  |
| chr6  | Hoxa4         | Downstrear | N | 52138686  | 52139685  | 5  | 55.6  | 14.7 | 59.3  | 10.0 |
| chr5  | Pisd          | Downstrear | N | 33077962  | 33078961  | 5  | 43.3  | 20.3 | 65.2  | 17.5 |
| chr6  | Ptpro         | Downstrear | N | 137413155 | 137414154 | 5  | 68.2  | 15.4 | 60.9  | 13.9 |
| chr2  | Adamtsl2      | Downstrear | N | 26964134  | 26965133  | 5  | 62.4  | 25.7 | 63.8  | 17.0 |
| chr9  | Fam81a        | Downstrear | N | 69936117  | 69937116  | 5  | 70.7  | 46.7 | 53.6  | 7.5  |

|       |               |            |   |           |           |   |       |      |      |      |
|-------|---------------|------------|---|-----------|-----------|---|-------|------|------|------|
| chr17 | Pgp           | Downstrear | N | 24608542  | 24609541  | 5 | 44.1  | 6.4  | 52.9 | 7.6  |
| chr18 | Ablim3        | Downstrear | N | 61958047  | 61959046  | 5 | 63.4  | 13.9 | 78.6 | 34.0 |
| chr13 | Gm16907       | Downstrear | N | 63389462  | 63390461  | 5 | 71.0  | 45.4 | 79.1 | 34.7 |
| chr12 | F730043M19Rik | Downstrear | N | 33795576  | 33796575  | 5 | 56.1  | 17.7 | 67.8 | 24.4 |
| chr7  | Syne4         | Downstrear | N | 31104065  | 31105064  | 5 | 36.4  | 2.2  | 48.9 | 7.1  |
| chr14 | Pnp           | Downstrear | N | 51573088  | 51574087  | 5 | 59.6  | 15.0 | 61.7 | 21.1 |
| chr10 | 9530003J23Rik | Downstrear | N | 116669809 | 116670808 | 5 | 57.9  | 32.4 | 69.8 | 29.3 |
| chr7  | Clrn3         | Downstrear | N | 142702139 | 142703138 | 5 | 72.2  | 41.3 | 63.8 | 23.4 |
| chr1  | Dyrk3         | Downstrear | N | 133024018 | 133025017 | 5 | 71.7  | 41.2 | 75.1 | 34.9 |
| chr11 | Hoxb7         | Downstrear | N | 96151478  | 96152477  | 5 | 62.9  | 23.4 | 64.9 | 24.7 |
| chr1  | 2900060B14Rik | Downstrear | N | 120354246 | 120355245 | 5 | 72.2  | 54.2 | 74.4 | 34.2 |
| chr17 | B3galt4       | Downstrear | N | 34085857  | 34086856  | 5 | 39.8  | 12.9 | 51.3 | 11.3 |
| chr7  | Ppp6r1        | Downstrear | N | 4582097   | 4583096   | 6 | 65.6  | 1.7  | 48.8 | 9.7  |
| chr15 | Xpnpep3       | Downstrear | N | 81285319  | 81286318  | 5 | 75.3  | 38.9 | 70.9 | 32.2 |
| chr16 | Gm10818       | Downstrear | N | 32664309  | 32665308  | 5 | 90.0  | 74.2 | 97.0 | 58.7 |
| chr18 | Gm6277        | Downstrear | N | 11978597  | 11979596  | 5 | 70.0  | 0.0  | 84.5 | 46.4 |
| chr3  | Intu          | Downstrear | N | 40508697  | 40509696  | 5 | 63.5  | 29.8 | 72.2 | 34.3 |
| chr2  | Tbc1d20       | Downstrear | N | 152138327 | 152139326 | 5 | 53.0  | 26.2 | 59.3 | 21.5 |
| chr8  | Clec4g        | Downstrear | N | 3715071   | 3716070   | 5 | 86.7  | 63.9 | 83.3 | 45.8 |
| chr4  | Glipr2        | Downstrear | N | 43991991  | 43992990  | 5 | 81.4  | 36.7 | 67.4 | 30.2 |
| chr16 | Lztr1         | Downstrear | N | 17526424  | 17527423  | 5 | 100.0 | 57.5 | 86.4 | 49.8 |
| chr7  | Unc45a        | Downstrear | N | 87469179  | 87470178  | 4 | 74.7  | 53.2 | 70.6 | 34.1 |
| chr11 | Gm11944       | Downstrear | N | 3220726   | 3221725   | 5 | 49.5  | 17.2 | 54.7 | 19.1 |
| chr16 | BC016579      | Downstrear | N | 45625961  | 45626960  | 5 | 97.0  | 48.0 | 62.8 | 27.2 |
| chr9  | Prss45        | Downstrear | N | 110743815 | 110744814 | 5 | 72.2  | 42.6 | 59.7 | 24.5 |
| chr2  | Itih2         | Downstrear | N | 10015218  | 10016217  | 5 | 41.8  | 3.1  | 34.4 | 0.0  |
| chr13 | Pdlim7        | Downstrear | N | 55597848  | 55598847  | 5 | 44.4  | 1.5  | 67.2 | 33.0 |
| chr7  | Dmwd          | Downstrear | N | 19668125  | 19669124  | 6 | 59.7  | 35.3 | 57.7 | 24.0 |
| chr14 | Mrps16        | Downstrear | N | 21209453  | 21210452  | 5 | 79.2  | 14.4 | 68.4 | 35.1 |
| chr6  | Prh1          | Downstrear | N | 132522420 | 132523419 | 5 | 90.3  | 67.8 | 95.5 | 62.3 |
| chr14 | Ncoa4         | Downstrear | N | 32992550  | 32993549  | 5 | 67.5  | 38.3 | 52.7 | 20.0 |
| chr14 | Timm23        | Downstrear | N | 32992352  | 32993351  | 4 | 67.5  | 38.3 | 52.7 | 20.0 |
| chr14 | Dlgap5        | Downstrear | N | 48006454  | 48007453  | 5 | 67.3  | 42.4 | 61.4 | 28.9 |
| chr9  | Tcaim         | Downstrear | N | 122745451 | 122746450 | 5 | 30.3  | 3.8  | 39.6 | 7.2  |
| chr14 | Klf5          | Downstrear | N | 99712629  | 99713628  | 5 | 75.1  | 35.3 | 67.8 | 35.4 |
| chr11 | Med9          | Downstrear | N | 59776809  | 59777808  | 1 | 68.9  | 36.1 | 59.9 | 27.6 |
| chr19 | Rela          | Downstrear | N | 5648131   | 5649130   | 3 | 66.1  | 45.8 | 67.3 | 35.2 |
| chr18 | Ptpn2         | Downstrear | N | 67824155  | 67825154  | 5 | 86.4  | 69.3 | 90.4 | 58.3 |
| chr5  | Pom121        | Downstrear | N | 135851010 | 135852009 | 5 | 83.0  | 53.3 | 78.5 | 46.7 |
| chr6  | Slc6a12       | Downstrear | N | 121315792 | 121316791 | 5 | 71.8  | 39.2 | 44.2 | 12.5 |
| chr15 | Slc52a2       | Downstrear | N | 76372561  | 76373560  | 5 | 69.9  | 27.8 | 56.0 | 24.6 |
| chr3  | Arl14         | Downstrear | N | 69027541  | 69028540  | 5 | 72.2  | 37.2 | 65.5 | 34.2 |
| chr1  | A130010J15Rik | Downstrear | N | 195004027 | 195005026 | 5 | 70.3  | 51.0 | 55.5 | 24.8 |
| chr3  | Naa15         | Downstrear | N | 51279908  | 51280907  | 5 | 97.1  | 46.0 | 95.2 | 64.8 |
| chr13 | Jarid2        | Downstrear | N | 45017013  | 45018012  | 6 | 64.1  | 41.8 | 81.0 | 50.9 |
| chr17 | Sox8          | Downstrear | N | 25701838  | 25702837  | 5 | 55.1  | 38.3 | 65.1 | 35.2 |
| chr17 | Mtch1         | Downstrear | N | 29468021  | 29469020  | 5 | 81.0  | 49.4 | 56.2 | 26.9 |
| chr11 | Snord96a      | Downstrear | N | 48615612  | 48616611  | 6 | 33.8  | 12.1 | 51.7 | 22.5 |
| chr11 | Mrpl38        | Downstrear | N | 115992131 | 115993130 | 3 | 79.4  | 48.4 | 34.6 | 5.6  |

|       |               |            |   |           |           |   |      |      |      |      |
|-------|---------------|------------|---|-----------|-----------|---|------|------|------|------|
| chr5  | Rbm33         | Downstrear | N | 28745783  | 28746782  | 5 | 61.5 | 33.8 | 55.3 | 26.3 |
| chr18 | Elac1         | Downstrear | N | 73893692  | 73894691  | 5 | 68.3 | 14.9 | 54.9 | 26.3 |
| chr11 | Kat2a         | Downstrear | N | 100565060 | 100566059 | 6 | 60.7 | 10.0 | 66.0 | 37.7 |
| chr2  | Gdf5          | Downstrear | N | 155765761 | 155766760 | 5 | 84.8 | 55.3 | 75.7 | 47.4 |
| chr17 | Wtap          | Downstrear | N | 13162886  | 13163885  | 5 | 76.9 | 39.7 | 65.5 | 37.2 |
| chr8  | Exosc6        | Downstrear | N | 113581565 | 113582564 | 5 | 71.7 | 50.8 | 78.8 | 50.6 |
| chr8  | Klkb1         | Downstrear | N | 46353807  | 46354806  | 5 | 90.9 | 63.3 | 85.9 | 57.9 |
| chr2  | D330050G23Rik | Downstrear | N | 116738528 | 116739527 | 5 | 68.0 | 43.7 | 73.1 | 45.1 |
| chr1  | Sctr          | Downstrear | N | 121960110 | 121961109 | 5 | 79.8 | 41.9 | 72.0 | 44.2 |
| chr3  | Ccdc169       | Downstrear | N | 54976858  | 54977857  | 5 | 51.2 | 29.6 | 69.9 | 42.1 |
| chr9  | Nr2e3         | Downstrear | N | 59789578  | 59790577  | 5 | 51.1 | 18.1 | 47.7 | 19.9 |
| chr4  | Mir200b       | Downstrear | N | 155428790 | 155429789 | 6 | 24.1 | 5.8  | 28.1 | 0.4  |
| chr19 | Nmrk1         | Downstrear | N | 18726675  | 18727674  | 4 | 85.4 | 45.6 | 76.9 | 49.2 |
| chr8  | Clgn          | Downstrear | N | 85950729  | 85951728  | 5 | 35.5 | 3.8  | 39.5 | 11.8 |
| chr3  | Efna4         | Downstrear | N | 89136315  | 89137314  | 5 | 50.5 | 8.7  | 33.0 | 5.5  |
| chr4  | Mllt3         | Downstrear | N | 87414829  | 87415828  | 5 | 66.1 | 48.0 | 57.8 | 30.4 |
| chr7  | Sephs2        | Downstrear | N | 134414395 | 134415394 | 5 | 75.3 | 33.5 | 60.7 | 33.7 |
| chr3  | Phgdh         | Downstrear | N | 98116094  | 98117093  | 5 | 49.3 | 26.9 | 41.1 | 14.0 |
| chr18 | Atg12         | Downstrear | N | 46891071  | 46892070  | 5 | 54.1 | 36.7 | 88.4 | 61.7 |
| chr4  | Casz1         | Downstrear | N | 148329002 | 148330001 | 5 | 70.5 | 49.2 | 68.8 | 42.1 |
| chr4  | Gnb1          | Downstrear | N | 154933379 | 154934378 | 5 | 58.7 | 22.8 | 61.9 | 35.3 |
| chr18 | Fbxo15        | Downstrear | N | 85150785  | 85151784  | 5 | 82.3 | 54.4 | 70.1 | 43.6 |
| chr13 | Larp4b        | Downstrear | N | 9172337   | 9173336   | 5 | 84.5 | 64.1 | 83.1 | 56.6 |
| chr1  | 3110035E14Rik | Downstrear | N | 9617224   | 9618223   | 5 | 62.3 | 42.9 | 35.9 | 9.5  |
| chr8  | Trhr2         | Downstrear | N | 124879867 | 124880866 | 5 | 73.2 | 50.3 | 63.4 | 37.0 |
| chr11 | Rnf167        | Downstrear | N | 70464917  | 70465916  | 6 | 27.2 | 10.1 | 34.0 | 7.9  |
| chr2  | Alx4          | Downstrear | N | 93521497  | 93522496  | 5 | 58.2 | 33.5 | 53.2 | 27.3 |
| chr2  | Gm14207       | Downstrear | N | 119145935 | 119146934 | 5 | 82.2 | 61.9 | 79.1 | 53.2 |
| chr15 | Ccdc134       | Downstrear | N | 81972633  | 81973632  | 5 | 61.1 | 37.0 | 62.1 | 36.4 |
| chr6  | Parp11        | Downstrear | N | 127444258 | 127445257 | 5 | 44.5 | 7.2  | 34.8 | 9.4  |
| chr7  | Rcn3          | Downstrear | N | 52337284  | 52338283  | 4 | 51.1 | 26.3 | 50.1 | 24.8 |
| chr19 | 1700054A03Rik | Downstrear | N | 53158883  | 53159882  | 5 | 68.2 | 47.9 | 69.7 | 44.7 |
| chr12 | Fam161b       | Downstrear | N | 85685267  | 85686266  | 6 | 85.5 | 70.1 | 95.2 | 70.6 |
| chr12 | Zfp410        | Downstrear | N | 85685390  | 85686389  | 5 | 85.5 | 70.1 | 95.2 | 70.6 |
| chr11 | Uqcr10        | Downstrear | N | 4600971   | 4601970   | 5 | 51.7 | 27.2 | 50.2 | 25.6 |
| chr2  | Manbal        | Downstrear | N | 157222500 | 157223499 | 5 | 61.9 | 2.8  | 55.9 | 31.5 |
| chr4  | Aldh1b1       | Downstrear | N | 45817481  | 45818480  | 5 | 85.8 | 68.5 | 82.8 | 58.4 |
| chr12 | Exoc3l4       | Downstrear | N | 112669395 | 112670394 | 5 | 64.5 | 26.5 | 38.1 | 13.8 |
| chr10 | Prf1          | Downstrear | N | 60767012  | 60768011  | 5 | 75.8 | 53.2 | 71.3 | 47.0 |
| chr11 | Gm53          | Downstrear | N | 96125799  | 96126798  | 6 | 31.2 | 0.7  | 27.1 | 2.8  |
| chr6  | Gm15612       | Downstrear | N | 88797269  | 88798268  | 5 | 85.7 | 67.9 | 89.4 | 65.2 |
| chr12 | Mir668        | Downstrear | N | 110973008 | 110974007 | 5 | 70.9 | 55.1 | 78.7 | 54.5 |
| chr1  | Elf3          | Downstrear | N | 137149151 | 137150150 | 5 | 36.9 | 6.8  | 28.6 | 4.5  |
| chr11 | Sectm1b       | Downstrear | N | 120913737 | 120914736 | 5 | 71.0 | 51.1 | 74.6 | 50.6 |
| chr5  | Polr2b        | Downstrear | N | 77778354  | 77779353  | 5 | 65.3 | 42.9 | 84.2 | 60.4 |
| chr7  | Zfp566        | Downstrear | N | 30861356  | 30862355  | 5 | 65.3 | 42.1 | 66.5 | 43.1 |
| chr15 | D930007P13Rik | Downstrear | N | 102952501 | 102953500 | 5 | 59.6 | 43.4 | 50.2 | 26.8 |
| chr4  | Gem           | Downstrear | N | 11642141  | 11643140  | 5 | 71.0 | 11.5 | 66.0 | 42.7 |
| chr4  | S100pbp       | Downstrear | N | 128827069 | 128828068 | 5 | 56.8 | 36.0 | 61.1 | 37.8 |

|       |               |            |   |           |           |   |      |      |      |      |
|-------|---------------|------------|---|-----------|-----------|---|------|------|------|------|
| chr5  | Piwil1        | Downstrear | N | 129261350 | 129262349 | 5 | 81.3 | 12.9 | 50.9 | 27.6 |
| chr10 | Cnksr3        | Downstrear | N | 3227480   | 3228479   | 5 | 87.6 | 53.5 | 75.7 | 52.5 |
| chr2  | Tmem230       | Downstrear | N | 132064228 | 132065227 | 5 | 40.1 | 18.3 | 43.6 | 20.5 |
| chr13 | 2310005E17Rik | Downstrear | N | 99193065  | 99194064  | 5 | 89.1 | 43.0 | 63.5 | 40.4 |
| chr17 | Hspa1l        | Downstrear | N | 35116174  | 35117173  | 5 | 87.7 | 55.6 | 77.3 | 54.4 |
| chr10 | Tbc1d30       | Downstrear | N | 120699876 | 120700875 | 5 | 66.0 | 40.0 | 63.0 | 40.1 |
| chr5  | Pms2          | Downstrear | N | 144692626 | 144693625 | 5 | 50.0 | 11.8 | 28.6 | 5.7  |
| chr12 | Mir3070a      | Downstrear | N | 110826242 | 110827241 | 6 | 80.5 | 53.0 | 83.6 | 60.7 |
| chr2  | Vps18         | Downstrear | N | 119124190 | 119125189 | 5 | 76.8 | 61.2 | 69.0 | 46.2 |
| chr7  | Trappc6a      | Downstrear | N | 20101495  | 20102494  | 5 | 47.1 | 28.4 | 63.6 | 40.9 |
| chr2  | 4921530L18Rik | Downstrear | N | 13990960  | 13991959  | 5 | 54.9 | 7.0  | 22.7 | 0.0  |
| chr19 | Gm9895        | Downstrear | N | 29143994  | 29144993  | 5 | 30.5 | 0.0  | 25.8 | 3.1  |
| chr7  | Ccnd1         | Downstrear | N | 152114836 | 152115835 | 5 | 57.5 | 28.2 | 54.7 | 32.1 |
| chr1  | Neurl3        | Downstrear | N | 36320447  | 36321446  | 5 | 30.4 | 9.0  | 49.3 | 26.7 |
| chr7  | Spib          | Downstrear | N | 51780365  | 51781364  | 4 | 35.2 | 12.4 | 33.7 | 11.2 |
| chr5  | Limch1        | Downstrear | N | 67448399  | 67449398  | 5 | 90.0 | 70.0 | 75.5 | 53.1 |
| chr2  | Acvr1         | Downstrear | N | 58297849  | 58298848  | 5 | 68.7 | 46.5 | 61.6 | 39.3 |
| chr14 | Timm8a2       | Downstrear | N | 122437645 | 122438644 | 5 | 84.5 | 36.1 | 78.1 | 56.0 |
| chr12 | Rab15         | Downstrear | N | 77897950  | 77898949  | 5 | 24.3 | 5.4  | 25.4 | 3.3  |
| chr2  | Foxs1         | Downstrear | N | 152756634 | 152757633 | 5 | 74.9 | 47.3 | 63.5 | 41.6 |
| chr5  | Zcchc8        | Downstrear | N | 124147311 | 124148310 | 5 | 56.9 | 29.6 | 54.9 | 32.9 |
| chr11 | Erbp2         | Downstrear | N | 98299031  | 98300030  | 3 | 50.7 | 29.1 | 41.6 | 19.8 |
| chr1  | Traf3ip3      | Downstrear | N | 195000698 | 195001697 | 5 | 78.7 | 55.1 | 78.6 | 56.9 |
| chr1  | 1700019A02Rik | Downstrear | N | 53214421  | 53215420  | 5 | 65.4 | 47.3 | 70.7 | 49.0 |
| chr6  | Ogg1          | Downstrear | N | 113284181 | 113285180 | 5 | 67.3 | 47.7 | 68.8 | 47.3 |
| chr6  | H2afj         | Downstrear | N | 136758596 | 136759595 | 5 | 30.5 | 11.5 | 39.4 | 17.9 |
| chr19 | Tmem179b      | Downstrear | N | 8846012   | 8847011   | 5 | 86.0 | 13.8 | 77.5 | 56.2 |
| chr4  | Al464131      | Downstrear | N | 41441634  | 41442633  | 5 | 86.6 | 46.5 | 71.3 | 50.0 |
| chr11 | Alkbh5        | Downstrear | N | 60372015  | 60373014  | 5 | 52.0 | 10.7 | 28.1 | 6.9  |
| chr19 | Fam178a       | Downstrear | N | 45058278  | 45059277  | 6 | 67.9 | 51.7 | 84.2 | 63.1 |
| chr11 | Serpinf2      | Downstrear | N | 75244238  | 75245237  | 5 | 91.4 | 74.0 | 87.9 | 66.9 |
| chr16 | Gsk3b         | Downstrear | N | 38246166  | 38247165  | 5 | 47.3 | 28.6 | 51.0 | 30.0 |
| chr12 | Mir345        | Downstrear | N | 110075279 | 110076278 | 5 | 36.3 | 14.5 | 42.0 | 21.0 |
| chr11 | 4933422H20Rik | Downstrear | N | 115309583 | 115310582 | 5 | 67.8 | 22.8 | 54.0 | 33.2 |
| chr12 | Tspan13       | Downstrear | N | 36740142  | 36741141  | 5 | 51.7 | 32.5 | 62.9 | 42.1 |
| chr1  | Lefty2        | Downstrear | N | 182829234 | 182830233 | 5 | 65.7 | 46.6 | 72.1 | 51.5 |
| chr1  | Syt14         | Downstrear | N | 194722501 | 194723500 | 5 | 96.0 | 80.6 | 87.8 | 67.5 |
| chr13 | Nr2f1         | Downstrear | N | 78327236  | 78328235  | 5 | 71.4 | 52.0 | 57.3 | 37.1 |
| chr11 | Rnf112        | Downstrear | N | 61260944  | 61261943  | 5 | 65.0 | 44.2 | 72.4 | 52.2 |
| chr10 | Irak3         | Downstrear | N | 119577710 | 119578709 | 5 | 74.1 | 58.8 | 67.6 | 47.4 |
| chr1  | Ugt1a10       | Downstrear | N | 90116578  | 90117577  | 5 | 38.0 | 9.1  | 34.3 | 14.3 |
| chr1  | Ugt1a5        | Downstrear | N | 90116578  | 90117577  | 5 | 38.0 | 9.1  | 34.3 | 14.3 |
| chr2  | Ap5s1         | Downstrear | N | 131039251 | 131040250 | 5 | 64.1 | 37.7 | 71.6 | 51.7 |
| chr3  | Nup210l       | Downstrear | N | 90015940  | 90016939  | 6 | 51.8 | 23.4 | 32.6 | 13.0 |
| chr11 | Mir10a        | Downstrear | N | 96178589  | 96179588  | 3 | 57.1 | 33.1 | 54.9 | 35.3 |
| chr7  | Cyb5r2        | Downstrear | N | 114890969 | 114891968 | 5 | 62.6 | 32.8 | 68.4 | 49.0 |
| chr17 | Jmjd8         | Downstrear | N | 25968789  | 25969788  | 1 | 52.3 | 36.6 | 55.4 | 36.1 |
| chr12 | Serpina3m     | Downstrear | N | 105632468 | 105633467 | 5 | 81.0 | 65.0 | 78.8 | 59.5 |
| chr8  | Myo16         | Downstrear | N | 10633951  | 10634950  | 5 | 75.0 | 26.8 | 51.6 | 32.4 |

|       |               |            |   |           |           |   |       |      |       |      |
|-------|---------------|------------|---|-----------|-----------|---|-------|------|-------|------|
| chr15 | Ttll8         | Downstrear | N | 88743328  | 88744327  | 5 | 80.8  | 62.5 | 73.4  | 54.2 |
| chr4  | Cited4        | Downstrear | N | 120340426 | 120341425 | 5 | 83.8  | 66.0 | 85.6  | 66.4 |
| chr18 | Pcdhb7        | Downstrear | N | 37504862  | 37505861  | 5 | 97.1  | 58.9 | 77.5  | 58.3 |
| chr5  | 5033403H07Rik | Downstrear | N | 53363251  | 53364250  | 5 | 64.8  | 35.8 | 76.5  | 57.5 |
| chr12 | Pomc          | Downstrear | N | 3960644   | 3961643   | 5 | 88.7  | 71.1 | 71.6  | 52.7 |
| chr19 | Atg2a         | Downstrear | N | 6262305   | 6263304   | 5 | 27.3  | 9.7  | 26.1  | 7.1  |
| chr17 | Gm6623        | Downstrear | N | 36318310  | 36319309  | 5 | 54.4  | 17.1 | 48.6  | 29.6 |
| chr17 | Ntn3          | Downstrear | N | 24339791  | 24340790  | 5 | 27.0  | 2.0  | 24.0  | 5.2  |
| chr1  | Nuak2         | Downstrear | N | 134230066 | 134231065 | 5 | 23.5  | 3.6  | 23.6  | 4.8  |
| chr1  | C030007H22Rik | Downstrear | N | 91255917  | 91256916  | 5 | 84.4  | 58.6 | 77.3  | 58.6 |
| chr11 | Gemin4        | Downstrear | N | 76023073  | 76024072  | 5 | 76.3  | 60.2 | 75.6  | 57.0 |
| chr5  | Rhbdd2        | Downstrear | N | 136122247 | 136123246 | 5 | 84.7  | 62.3 | 83.9  | 65.3 |
| chr10 | Ctdsp2        | Downstrear | N | 126437032 | 126438031 | 5 | 90.9  | 56.0 | 72.5  | 54.1 |
| chr8  | Cdkn2aip      | Downstrear | N | 48793698  | 48794697  | 5 | 41.3  | 26.0 | 36.7  | 18.5 |
| chr5  | Sdad1         | Downstrear | N | 92712036  | 92713035  | 5 | 45.2  | 8.7  | 38.4  | 20.5 |
| chr11 | 4933402P03Rik | Downstrear | N | 69629068  | 69630067  | 5 | 85.0  | 64.3 | 89.9  | 72.1 |
| chr17 | Oard1         | Downstrear | N | 48556592  | 48557591  | 5 | 66.1  | 43.1 | 58.5  | 40.7 |
| chr5  | Niacr1        | Downstrear | N | 124312579 | 124313578 | 5 | 39.3  | 14.3 | 45.2  | 27.5 |
| chr8  | Cd209c        | Downstrear | N | 3939222   | 3940221   | 5 | 100.0 | 77.2 | 89.5  | 71.9 |
| chr9  | Apoa4         | Downstrear | N | 46051542  | 46052541  | 5 | 46.1  | 18.4 | 43.1  | 25.5 |
| chr15 | Troap         | Downstrear | N | 98913841  | 98914840  | 5 | 26.7  | 1.4  | 30.1  | 12.6 |
| chr2  | Nsfl1c        | Downstrear | N | 151337041 | 151338040 | 5 | 79.8  | 61.6 | 74.0  | 56.5 |
| chr7  | Calca         | Downstrear | N | 121773992 | 121774991 | 5 | 97.6  | 79.2 | 79.3  | 61.9 |
| chr8  | Emc8          | Downstrear | N | 123176814 | 123177813 | 5 | 88.5  | 52.9 | 57.3  | 39.9 |
| chr7  | Psg22         | Downstrear | N | 19312598  | 19313597  | 5 | 77.2  | 49.6 | 65.1  | 47.8 |
| chr6  | Gimap3        | Downstrear | N | 48713463  | 48714462  | 5 | 70.8  | 42.2 | 69.1  | 51.7 |
| chr4  | Pomgnt1       | Downstrear | N | 115832450 | 115833449 | 5 | 62.7  | 42.9 | 68.4  | 51.1 |
| chr6  | Pex26         | Downstrear | N | 121146204 | 121147203 | 5 | 74.0  | 44.2 | 84.3  | 67.1 |
| chr7  | Hsd17b14      | Downstrear | N | 52822692  | 52823691  | 5 | 43.3  | 22.6 | 41.4  | 24.3 |
| chr3  | Pde5a         | Downstrear | N | 122562293 | 122563292 | 5 | 66.5  | 48.2 | 64.2  | 47.2 |
| chr4  | Lrrc42        | Downstrear | N | 106905119 | 106906118 | 5 | 95.7  | 68.5 | 90.3  | 73.4 |
| chr15 | Mtss1         | Downstrear | N | 58771789  | 58772788  | 6 | 86.7  | 67.3 | 82.5  | 65.7 |
| chr13 | Slc28a3       | Downstrear | N | 58653669  | 58654668  | 5 | 93.3  | 76.5 | 90.5  | 73.7 |
| chr16 | Olf190        | Downstrear | N | 59072981  | 59073980  | 5 | 90.5  | 75.0 | 100.0 | 83.5 |
| chr9  | Acy1          | Downstrear | N | 106334312 | 106335311 | 5 | 76.9  | 56.7 | 86.3  | 69.9 |
| chr19 | Fads3         | Downstrear | N | 10134162  | 10135161  | 5 | 36.9  | 9.1  | 24.8  | 8.4  |
| chr4  | Mir200a       | Downstrear | N | 155428005 | 155429004 | 6 | 34.8  | 8.6  | 36.0  | 19.7 |
| chr9  | Sdhd          | Downstrear | N | 50403445  | 50404444  | 5 | 49.1  | 2.6  | 56.9  | 40.6 |
| chr4  | 1700042G07Rik | Downstrear | N | 115846903 | 115847902 | 5 | 30.7  | 9.2  | 35.3  | 19.0 |
| chr18 | Mbp           | Downstrear | N | 82755030  | 82756029  | 5 | 84.1  | 65.9 | 87.1  | 70.8 |
| chr16 | Fopnl         | Downstrear | N | 14298337  | 14299336  | 5 | 93.0  | 72.6 | 98.5  | 82.2 |
| chr2  | Id1           | Downstrear | N | 152563147 | 152564146 | 5 | 17.6  | 1.3  | 19.4  | 3.6  |
| chr4  | Rpp25l        | Downstrear | N | 41658065  | 41659064  | 5 | 78.6  | 43.0 | 67.8  | 52.1 |
| chr17 | Clps          | Downstrear | N | 28694159  | 28695158  | 5 | 56.7  | 38.7 | 65.6  | 49.9 |
| chr17 | Tbl3          | Downstrear | N | 24836598  | 24837597  | 5 | 20.0  | 1.8  | 16.2  | 0.6  |
| chr5  | Fam109a       | Downstrear | N | 122304609 | 122305608 | 5 | 90.6  | 63.7 | 80.0  | 64.4 |
| chr2  | Cst8          | Downstrear | N | 148631321 | 148632320 | 5 | 88.4  | 70.6 | 82.1  | 66.6 |
| chr2  | Trp53i11      | Downstrear | N | 93041915  | 93042914  | 6 | 91.1  | 71.9 | 91.0  | 75.5 |
| chr11 | Fasn          | Downstrear | N | 120666272 | 120667271 | 5 | 41.0  | 20.4 | 43.2  | 27.7 |

|       |               |            |   |           |           |   |       |      |      |      |
|-------|---------------|------------|---|-----------|-----------|---|-------|------|------|------|
| chr2  | Agbl2         | Downstrear | N | 90656389  | 90657388  | 5 | 30.0  | 2.5  | 28.3 | 12.9 |
| chr10 | Bloc1s1       | Downstrear | N | 128355970 | 128356969 | 6 | 61.0  | 37.0 | 62.7 | 47.3 |
| chr15 | Snord72       | Downstrear | N | 5068481   | 5069480   | 5 | 88.5  | 67.4 | 81.6 | 66.2 |
| chr11 | Chmp6         | Downstrear | N | 119780867 | 119781866 | 5 | 83.7  | 66.3 | 73.7 | 58.4 |
| chr17 | Prss32        | Downstrear | N | 23996744  | 23997743  | 5 | 91.4  | 59.4 | 83.7 | 68.4 |
| chr4  | 1700125G02Rik | Downstrear | N | 124567132 | 124568131 | 5 | 63.6  | 45.3 | 64.5 | 49.3 |
| chr1  | Ahctf1        | Downstrear | N | 181674035 | 181675034 | 5 | 100.0 | 41.9 | 71.9 | 56.7 |
| chr2  | Bcas1         | Downstrear | N | 170171491 | 170172490 | 5 | 81.0  | 29.7 | 22.6 | 7.4  |
| chr4  | E130309F12Rik | Downstrear | N | 49353134  | 49354133  | 5 | 88.9  | 57.4 | 76.9 | 61.8 |
| chr12 | Ptgr2         | Downstrear | N | 85656783  | 85657782  | 4 | 39.2  | 16.7 | 36.4 | 21.3 |
| chr14 | Myh6          | Downstrear | N | 55559758  | 55560757  | 5 | 71.2  | 55.0 | 58.8 | 43.7 |
| chr3  | 5330417C22Rik | Downstrear | N | 108259987 | 108260986 | 5 | 59.9  | 44.1 | 66.7 | 51.6 |
| chr8  | Tnpo2         | Downstrear | N | 87581482  | 87582481  | 5 | 97.4  | 77.1 | 92.2 | 77.1 |
| chr12 | Crip2         | Downstrear | N | 114383718 | 114384717 | 4 | 79.7  | 64.4 | 66.2 | 51.2 |
| chr5  | Trafd1        | Exon10     | N | 121834049 | 121834113 | 2 | 68.5  | 2.9  | 57.8 | 1.6  |
| chr15 | Baiap2l2      | Exon10     | N | 79113856  | 79113917  | 1 | 29.2  | 0.0  | 50.0 | 0.0  |
| chr9  | Pfkfb4        | Exon10     | N | 108930034 | 108930163 | 1 | 57.4  | 17.5 | 57.0 | 10.1 |
| chr13 | Msh3          | Exon10     | N | 93044685  | 93044872  | 1 | 30.7  | 5.9  | 37.7 | 2.3  |
| chr1  | Camk1g        | Exon10     | N | 195185913 | 195186041 | 1 | 77.4  | 40.4 | 77.6 | 43.8 |
| chr16 | Mylk          | Exon10     | N | 34899447  | 34899599  | 1 | 52.5  | 31.3 | 71.9 | 39.7 |
| chr7  | Sox6          | Exon10     | N | 122805786 | 122805958 | 1 | 55.6  | 18.1 | 63.8 | 32.0 |
| chr2  | Entpd6        | Exon10     | N | 150592695 | 150592832 | 1 | 82.2  | 64.8 | 85.2 | 55.3 |
| chr1  | Sdccag8       | Exon10     | N | 178804695 | 178804829 | 1 | 82.5  | 52.1 | 86.0 | 57.8 |
| chr4  | Rad54b        | Exon10     | N | 11536441  | 11536616  | 1 | 25.7  | 0.0  | 28.9 | 1.9  |
| chr3  | Rapgef2       | Exon10     | N | 78889667  | 78890050  | 2 | 85.0  | 67.9 | 91.3 | 65.2 |
| chr2  | Tnks1bp1      | Exon10     | N | 84912253  | 84912325  | 2 | 76.9  | 5.1  | 30.6 | 5.9  |
| chr10 | Enpp1         | Exon10     | N | 24376911  | 24377038  | 1 | 71.1  | 43.5 | 60.7 | 37.0 |
| chr9  | Hexa          | Exon10     | N | 59410674  | 59410857  | 1 | 74.4  | 47.1 | 63.2 | 40.0 |
| chr4  | Lepre1        | Exon10     | N | 118917562 | 118917712 | 1 | 74.6  | 46.3 | 63.1 | 40.1 |
| chr19 | Sorbs1        | Exon10     | N | 40424389  | 40424503  | 1 | 79.4  | 47.6 | 75.5 | 54.7 |
| chr13 | Rreb1         | Exon10     | N | 38038726  | 38039532  | 4 | 38.0  | 14.7 | 35.4 | 14.9 |
| chr14 | Ercc6         | Exon10     | N | 33373895  | 33374011  | 1 | 96.7  | 63.6 | 91.4 | 71.2 |
| chr1  | Hnrnpu        | Exon10     | N | 180264018 | 180264157 | 1 | 23.2  | 5.3  | 24.8 | 6.0  |
| chr17 | Vav1          | Exon10     | N | 57440604  | 57440699  | 1 | 69.9  | 51.4 | 73.5 | 54.8 |
| chr7  | Vasp          | Exon10     | N | 19849754  | 19849919  | 1 | 71.1  | 54.8 | 65.9 | 47.3 |
| chr6  | Lrp6          | Exon10     | N | 134420707 | 134420909 | 1 | 37.7  | 20.2 | 43.1 | 25.4 |
| chr13 | Larp4b        | Exon10     | N | 9150261   | 9150470   | 1 | 32.6  | 7.0  | 23.4 | 7.5  |
| chr8  | Fcer2a        | Exon10     | N | 3691119   | 3691221   | 2 | 80.0  | 62.5 | 72.8 | 57.1 |
| chr9  | Myzap         | Exon11     | N | 71427418  | 71427504  | 1 | 67.3  | 14.8 | 68.4 | 12.3 |
| chr12 | Slc26a3       | Exon11     | N | 32146573  | 32146668  | 1 | 87.3  | 40.6 | 75.0 | 23.4 |
| chr15 | Baiap2l2      | Exon11     | N | 79114437  | 79114523  | 1 | 53.5  | 5.0  | 46.7 | 10.2 |
| chr2  | Cacnb2        | Exon11     | N | 14905878  | 14906066  | 1 | 64.0  | 10.9 | 44.3 | 15.0 |
| chr10 | Tcf3          | Exon11     | N | 79881511  | 79881563  | 1 | 86.2  | 56.7 | 79.0 | 50.6 |
| chr11 | Tbrg4         | Exon11     | N | 6525152   | 6525216   | 1 | 32.4  | 3.7  | 29.0 | 3.4  |
| chr12 | Baz1a         | Exon11     | N | 56022025  | 56022132  | 1 | 89.2  | 71.1 | 84.5 | 59.2 |
| chr1  | Stau2         | Exon11     | N | 16499423  | 16499489  | 1 | 75.0  | 54.3 | 69.8 | 46.8 |
| chr4  | E230008N13Rik | Exon11     | N | 45918881  | 45918969  | 1 | 81.5  | 61.6 | 72.2 | 50.5 |
| chr5  | Naa25         | Exon11     | N | 121873544 | 121873751 | 1 | 78.9  | 47.1 | 75.7 | 55.4 |
| chr8  | Capn9         | Exon11     | N | 127131855 | 127131891 | 1 | 81.0  | 52.9 | 76.0 | 56.4 |

|       |               |        |   |           |           |   |      |      |      |      |
|-------|---------------|--------|---|-----------|-----------|---|------|------|------|------|
| chr5  | Tacc3         | Exon11 | N | 34012127  | 34012296  | 1 | 82.9 | 56.6 | 89.3 | 71.6 |
| chr5  | Pde6b         | Exon11 | N | 108854252 | 108854398 | 1 | 72.5 | 47.6 | 75.0 | 58.2 |
| chr17 | Cyp4f13       | Exon11 | N | 33083750  | 33083948  | 2 | 34.0 | 17.2 | 31.4 | 15.6 |
| chr17 | Notch4        | Exon11 | N | 34710694  | 34710853  | 1 | 64.5 | 45.5 | 73.1 | 57.7 |
| chr3  | Clca4         | Exon12 | N | 144510127 | 144510267 | 1 | 80.0 | 34.8 | 93.1 | 41.4 |
| chr3  | Ilf2          | Exon12 | N | 90291149  | 90291239  | 1 | 88.6 | 58.3 | 92.3 | 48.5 |
| chr14 | Lmo7          | Exon12 | N | 102297774 | 102297916 | 1 | 43.9 | 18.6 | 57.1 | 14.0 |
| chr18 | Arhgap26      | Exon12 | N | 39387022  | 39387087  | 1 | 77.3 | 38.1 | 91.7 | 54.4 |
| chr15 | Plec          | Exon12 | N | 76017041  | 76017193  | 1 | 83.2 | 25.5 | 64.2 | 27.9 |
| chr6  | Aak1          | Exon12 | N | 86913987  | 86914219  | 1 | 76.3 | 58.0 | 82.4 | 46.2 |
| chr15 | Mtss1         | Exon12 | N | 58886573  | 58886646  | 1 | 45.8 | 6.5  | 46.8 | 11.3 |
| chr12 | Ak7           | Exon12 | N | 106999678 | 106999806 | 1 | 48.5 | 9.6  | 45.5 | 14.4 |
| chr14 | Mphosph8      | Exon12 | N | 57315496  | 57315579  | 2 | 82.4 | 50.1 | 83.0 | 52.3 |
| chr2  | Cacnb2        | Exon12 | N | 14905878  | 14906066  | 1 | 64.0 | 10.9 | 44.3 | 15.0 |
| chr7  | Mical2        | Exon12 | N | 119466030 | 119466177 | 1 | 73.6 | 48.1 | 74.0 | 46.0 |
| chr6  | Copg1         | Exon12 | N | 87847947  | 87848042  | 1 | 23.1 | 3.6  | 28.1 | 3.2  |
| chr17 | Abca3         | Exon12 | N | 24520845  | 24520988  | 1 | 87.9 | 46.2 | 81.3 | 60.3 |
| chr2  | Znfx1         | Exon12 | N | 166885532 | 166885642 | 2 | 66.7 | 0.0  | 21.2 | 1.2  |
| chr4  | Emc1          | Exon12 | N | 138919572 | 138919694 | 1 | 95.8 | 69.8 | 89.6 | 69.9 |
| chr7  | Dmkn          | Exon13 | N | 31561098  | 31561142  | 1 | 53.3 | 29.6 | 62.9 | 12.9 |
| chr10 | Aim1          | Exon13 | N | 43699287  | 43699413  | 1 | 74.8 | 42.5 | 76.8 | 31.0 |
| chr14 | Gnl3          | Exon13 | N | 31830994  | 31831052  | 1 | 34.7 | 17.2 | 46.3 | 8.5  |
| chr17 | Wdr46         | Exon13 | N | 34086018  | 34086131  | 2 | 28.2 | 6.5  | 39.4 | 3.6  |
| chr11 | Stk10         | Exon13 | N | 32512671  | 32512800  | 1 | 48.1 | 21.6 | 59.8 | 24.9 |
| chr7  | Unc45a        | Exon13 | N | 87479581  | 87479749  | 1 | 34.4 | 6.7  | 36.0 | 2.3  |
| chr13 | Naip7         | Exon13 | N | 101085939 | 101086630 | 5 | 65.1 | 11.5 | 52.6 | 21.0 |
| chr18 | Nars          | Exon13 | N | 64674980  | 64675059  | 1 | 60.3 | 34.4 | 61.8 | 33.3 |
| chr17 | Trerf1        | Exon13 | N | 47465967  | 47466042  | 1 | 36.2 | 6.5  | 31.0 | 2.7  |
| chr14 | Uggt2         | Exon13 | N | 119428185 | 119428264 | 1 | 69.3 | 32.1 | 63.6 | 43.0 |
| chr8  | Myo16         | Exon13 | N | 10400484  | 10400589  | 1 | 55.8 | 30.2 | 51.8 | 31.3 |
| chr1  | Aox3l1        | Exon13 | N | 58361273  | 58361457  | 1 | 28.0 | 3.5  | 21.9 | 2.9  |
| chr2  | Cubn          | Exon13 | N | 13239784  | 13239971  | 1 | 68.6 | 38.6 | 68.3 | 50.0 |
| chr6  | Osbpl3        | Exon13 | N | 50296327  | 50296430  | 1 | 87.5 | 65.0 | 90.9 | 73.5 |
| chr13 | Dbn1          | Exon13 | N | 55584748  | 55584803  | 1 | 69.0 | 51.7 | 73.5 | 56.2 |
| chr2  | Kif5c         | Exon13 | N | 49585637  | 49585843  | 1 | 30.4 | 13.2 | 29.4 | 14.2 |
| chr18 | Me2           | Exon14 | N | 73964706  | 73964823  | 2 | 98.4 | 4.8  | 54.8 | 1.9  |
| chr6  | Krba1         | Exon14 | N | 48363362  | 48363502  | 1 | 69.5 | 23.0 | 70.2 | 18.6 |
| chr15 | Arfgap3       | Exon14 | N | 83173452  | 83173570  | 1 | 26.9 | 0.9  | 48.4 | 1.2  |
| chr11 | Gemin5        | Exon14 | N | 57959895  | 57960034  | 1 | 22.0 | 0.0  | 46.6 | 0.6  |
| chr9  | Pls1          | Exon14 | N | 95696181  | 95696285  | 2 | 20.6 | 0.0  | 35.5 | 5.0  |
| chr11 | Tmc8          | Exon14 | N | 117653403 | 117653481 | 1 | 30.7 | 11.3 | 34.0 | 6.6  |
| chr2  | Gsn           | Exon14 | N | 35160101  | 35160178  | 1 | 68.9 | 39.6 | 73.9 | 49.5 |
| chr16 | 4930562C15Rik | Exon14 | N | 4866204   | 4866284   | 1 | 34.0 | 0.0  | 27.6 | 3.7  |
| chr16 | Sidt1         | Exon14 | N | 44269961  | 44270032  | 1 | 59.6 | 40.0 | 57.9 | 35.0 |
| chr5  | Baz1b         | Exon14 | N | 135713789 | 135713936 | 1 | 86.2 | 69.1 | 83.0 | 65.3 |
| chr9  | Glb1l2        | Exon14 | N | 26599367  | 26599475  | 1 | 91.3 | 60.7 | 93.8 | 76.2 |
| chr3  | Fnbp1l        | Exon14 | N | 122293046 | 122293161 | 1 | 83.1 | 34.2 | 75.0 | 58.5 |
| chr10 | Ptprb         | Exon14 | N | 115783855 | 115784118 | 1 | 51.7 | 19.6 | 51.7 | 35.9 |
| chr1  | Lamc2         | Exon14 | N | 154991644 | 154991862 | 1 | 46.3 | 27.9 | 41.1 | 25.5 |

|       |          |        |   |           |           |   |      |      |      |      |
|-------|----------|--------|---|-----------|-----------|---|------|------|------|------|
| chr3  | Ahcyl1   | Exon14 | N | 107477929 | 107478072 | 1 | 75.4 | 50.0 | 62.1 | 46.7 |
| chr9  | Gramd1b  | Exon15 | N | 40125094  | 40125178  | 1 | 78.0 | 4.2  | 85.7 | 3.2  |
| chr5  | Sdad1    | Exon15 | N | 92731665  | 92731722  | 1 | 68.0 | 5.4  | 70.2 | 3.8  |
| chr17 | Cbs      | Exon15 | N | 31769773  | 31770099  | 2 | 25.8 | 0.5  | 63.4 | 1.6  |
| chr7  | Eml2     | Exon15 | N | 19787858  | 19787945  | 1 | 80.6 | 34.8 | 76.9 | 33.0 |
| chr2  | Kif5c    | Exon15 | N | 49590953  | 49591141  | 1 | 51.1 | 17.5 | 47.1 | 17.2 |
| chr4  | Eif4g3   | Exon15 | N | 137714306 | 137714425 | 1 | 98.1 | 82.8 | 91.2 | 70.1 |
| chr7  | Eps8l2   | Exon15 | N | 148546221 | 148546326 | 2 | 88.6 | 58.5 | 88.2 | 69.2 |
| chr5  | Tctn2    | Exon15 | N | 125075692 | 125075817 | 1 | 45.2 | 16.3 | 32.3 | 15.1 |
| chr5  | Anapc5   | Exon15 | N | 123269617 | 123269696 | 1 | 44.7 | 24.0 | 50.0 | 34.8 |
| chr16 | Itsn1    | Exon16 | N | 91837306  | 91837433  | 1 | 67.7 | 42.3 | 70.4 | 33.2 |
| chr12 | Mthfd1   | Exon16 | N | 77401375  | 77401451  | 1 | 74.6 | 43.5 | 82.6 | 49.7 |
| chr8  | Palld    | Exon16 | N | 64191609  | 64191675  | 1 | 42.1 | 20.9 | 52.2 | 22.4 |
| chr2  | Cep110   | Exon16 | N | 34999734  | 34999941  | 1 | 91.4 | 46.5 | 82.5 | 58.0 |
| chr7  | Adam8    | Exon16 | N | 147174710 | 147174778 | 1 | 50.8 | 11.8 | 56.8 | 33.3 |
| chr9  | Kri1     | Exon16 | N | 21091023  | 21091128  | 1 | 80.8 | 65.0 | 82.6 | 59.4 |
| chr6  | Eogt     | Exon16 | N | 97097871  | 97098252  | 1 | 34.8 | 5.7  | 28.5 | 8.6  |
| chr11 | Ap1b1    | Exon16 | N | 4937635   | 4937780   | 1 | 78.7 | 61.0 | 84.4 | 65.9 |
| chr17 | Tiam2    | Exon17 | N | 3506767   | 3506892   | 1 | 85.0 | 63.8 | 78.3 | 35.0 |
| chr2  | Pla2g4f  | Exon17 | N | 120138043 | 120138179 | 1 | 57.1 | 39.8 | 62.8 | 26.3 |
| chr2  | Armc3    | Exon17 | N | 19222099  | 19222296  | 1 | 45.9 | 15.6 | 56.6 | 22.5 |
| chr17 | Abcc10   | Exon17 | N | 46459086  | 46459242  | 1 | 92.4 | 35.4 | 89.5 | 55.6 |
| chr8  | Tnks     | Exon17 | N | 35930748  | 35930839  | 1 | 54.9 | 38.2 | 66.0 | 35.4 |
| chr9  | Megf11   | Exon17 | N | 64540162  | 64540290  | 1 | 49.2 | 0.0  | 28.6 | 0.0  |
| chr3  | Sema6c   | Exon17 | N | 94975256  | 94975311  | 1 | 22.9 | 0.0  | 21.3 | 0.0  |
| chr14 | Piwil2   | Exon17 | N | 70820447  | 70820557  | 1 | 75.4 | 53.3 | 70.8 | 51.6 |
| chr11 | Ccdc40   | Exon17 | N | 119124389 | 119124547 | 1 | 60.7 | 43.9 | 70.6 | 54.5 |
| chr19 | Pfce1    | Exon18 | N | 38820256  | 38820385  | 1 | 60.0 | 13.1 | 78.1 | 17.3 |
| chr5  | Wdr19    | Exon18 | N | 65622517  | 65622627  | 1 | 84.6 | 54.5 | 94.7 | 44.9 |
| chr13 | Naa35    | Exon18 | N | 59730279  | 59730346  | 1 | 93.7 | 64.9 | 91.1 | 45.0 |
| chr7  | Ptprh    | Exon18 | N | 4554650   | 4554815   | 2 | 58.6 | 17.4 | 54.5 | 9.3  |
| chr18 | Adamts19 | Exon18 | N | 59184101  | 59184236  | 1 | 85.4 | 53.3 | 72.7 | 39.3 |
| chr4  | Rere     | Exon18 | N | 149990050 | 149990272 | 1 | 35.1 | 1.7  | 31.0 | 1.1  |
| chr11 | Caskin2  | Exon18 | N | 115673201 | 115673696 | 4 | 63.6 | 31.7 | 59.5 | 32.1 |
| chr2  | Cwc22    | Exon18 | N | 77774650  | 77774779  | 2 | 79.1 | 46.8 | 77.4 | 52.3 |
| chr9  | Dync2h1  | Exon18 | N | 7016730   | 7016795   | 1 | 86.1 | 70.3 | 79.5 | 55.2 |
| chr17 | Pde10a   | Exon18 | N | 9167588   | 9167699   | 1 | 63.3 | 29.3 | 54.3 | 30.9 |
| chr7  | Eif4g2   | Exon18 | N | 118223696 | 118223836 | 1 | 63.4 | 32.4 | 64.0 | 43.4 |
| chr15 | Tnrc6b   | Exon18 | N | 80747114  | 80747290  | 1 | 88.0 | 69.5 | 85.7 | 65.9 |
| chr5  | Gsap     | Exon18 | N | 20763688  | 20763741  | 1 | 35.3 | 11.1 | 21.7 | 3.7  |
| chr7  | Ctr9     | Exon19 | N | 118194459 | 118194594 | 1 | 51.4 | 19.4 | 64.0 | 19.3 |
| chr6  | Plekha5  | Exon19 | N | 140518842 | 140518991 | 1 | 72.5 | 27.7 | 58.1 | 36.9 |
| chr18 | Spink5   | Exon19 | N | 44166025  | 44166118  | 1 | 58.5 | 43.2 | 68.9 | 48.1 |
| chr9  | Dlec1    | Exon19 | N | 119043587 | 119043740 | 1 | 50.8 | 32.0 | 36.5 | 18.6 |
| chr13 | Arhgef28 | Exon19 | N | 98740270  | 98740325  | 1 | 88.9 | 60.0 | 80.6 | 64.9 |
| chr14 | Ldb3     | Exon2  | N | 35355054  | 35355174  | 1 | 60.0 | 0.0  | 80.5 | 1.4  |
| chr5  | Ugt2b35  | Exon2  | N | 87433868  | 87433999  | 1 | 72.7 | 7.5  | 86.7 | 12.3 |
| chr14 | Dock9    | Exon2  | N | 121945778 | 121945878 | 1 | 86.4 | 7.6  | 84.2 | 12.5 |
| chr11 | BC018473 | Exon2  | N | 116615648 | 116615803 | 1 | 80.8 | 4.8  | 84.3 | 15.4 |



|       |               |       |   |           |           |   |      |      |      |      |
|-------|---------------|-------|---|-----------|-----------|---|------|------|------|------|
| chr8  | Bag4          | Exon2 | N | 26881551  | 26881805  | 1 | 79.1 | 6.4  | 78.4 | 11.6 |
| chr10 | Rdh1          | Exon2 | N | 127201738 | 127201901 | 1 | 81.1 | 0.0  | 63.3 | 10.3 |
| chr2  | Gata5         | Exon2 | N | 180062465 | 180062552 | 1 | 60.5 | 0.0  | 61.0 | 8.1  |
| chr13 | Cap2          | Exon2 | N | 46626346  | 46626446  | 1 | 72.0 | 11.0 | 67.8 | 17.3 |
| chr6  | Cd9           | Exon2 | N | 125412132 | 125412221 | 1 | 27.8 | 0.0  | 52.2 | 2.9  |
| chr17 | Msrb1         | Exon2 | N | 24877025  | 24877139  | 1 | 39.7 | 2.7  | 54.5 | 5.9  |
| chr7  | Tmem150b      | Exon2 | N | 4675911   | 4675978   | 1 | 75.0 | 44.0 | 70.7 | 22.2 |
| chr11 | Gabarap       | Exon2 | N | 69806084  | 69806202  | 1 | 62.9 | 12.5 | 57.8 | 9.6  |
| chr17 | Taf8          | Exon2 | N | 47630511  | 47630653  | 1 | 85.6 | 24.0 | 73.9 | 26.2 |
| chr11 | Krt19         | Exon2 | N | 100002837 | 100002998 | 1 | 48.7 | 19.9 | 62.3 | 14.7 |
| chr9  | Acaa1a        | Exon2 | N | 119251841 | 119251898 | 1 | 91.0 | 31.3 | 91.9 | 44.8 |
| chr13 | Ercc8         | Exon2 | N | 108956584 | 108956685 | 1 | 70.5 | 53.0 | 76.2 | 29.3 |
| chr16 | Drd3          | Exon2 | N | 43807491  | 43807633  | 1 | 69.2 | 30.0 | 66.3 | 20.2 |
| chr11 | Gm11978       | Exon2 | N | 6551368   | 6551453   | 1 | 54.7 | 19.1 | 60.5 | 15.1 |
| chr9  | C430002N11Rik | Exon2 | N | 96670370  | 96670515  | 1 | 47.4 | 8.8  | 47.3 | 3.7  |
| chr15 | 4930415O20Rik | Exon2 | N | 98418984  | 98419128  | 1 | 77.8 | 46.2 | 96.6 | 54.5 |
| chr6  | Plixnd1       | Exon2 | N | 115906613 | 115906753 | 1 | 68.7 | 32.4 | 73.2 | 31.2 |
| chr7  | Syne4         | Exon2 | N | 31101249  | 31101392  | 1 | 79.5 | 41.4 | 85.4 | 44.9 |
| chr3  | Pdzk1         | Exon2 | N | 96655414  | 96655663  | 1 | 77.9 | 50.7 | 83.2 | 43.8 |
| chr3  | Phf17         | Exon2 | N | 41392856  | 41392944  | 1 | 56.1 | 24.1 | 60.0 | 21.9 |
| chr10 | Specc1l       | Exon2 | N | 74703810  | 74703963  | 1 | 59.8 | 11.3 | 70.5 | 32.5 |
| chr9  | Fbxo9         | Exon2 | N | 77933714  | 77933807  | 1 | 75.4 | 28.3 | 69.0 | 31.6 |
| chr7  | Ears2         | Exon2 | N | 129187816 | 129187946 | 1 | 62.4 | 28.3 | 69.4 | 32.0 |
| chr12 | 4933406C10Rik | Exon2 | N | 33605688  | 33605768  | 1 | 78.3 | 50.0 | 81.6 | 44.4 |
| chr5  | Hadha         | Exon2 | N | 30447228  | 30447342  | 1 | 89.2 | 54.2 | 66.0 | 29.0 |
| chr1  | Soat1         | Exon2 | N | 158362978 | 158363113 | 1 | 70.5 | 42.0 | 73.2 | 36.3 |
| chr2  | Ssfa2         | Exon2 | N | 79479414  | 79479463  | 1 | 36.8 | 10.0 | 45.3 | 9.8  |
| chr17 | Gm17830       | Exon2 | N | 49447554  | 49447729  | 1 | 61.7 | 34.4 | 61.5 | 27.7 |
| chr2  | Med22         | Exon2 | N | 26764513  | 26764593  | 1 | 54.6 | 35.3 | 56.1 | 23.6 |
| chr14 | Slc7a7        | Exon2 | N | 54992624  | 54992773  | 1 | 50.0 | 21.9 | 49.2 | 17.3 |
| chr17 | Nfya          | Exon2 | N | 48531201  | 48531374  | 1 | 76.5 | 49.2 | 71.5 | 40.3 |
| chr10 | Itga7         | Exon2 | N | 128376324 | 128376403 | 1 | 27.8 | 3.6  | 30.7 | 0.0  |
| chr11 | Krt40         | Exon2 | N | 99401186  | 99401311  | 1 | 53.3 | 30.8 | 62.2 | 32.2 |
| chr6  | Rpusd3        | Exon2 | N | 113366783 | 113366906 | 1 | 93.5 | 63.1 | 84.4 | 54.5 |
| chr15 | Slc2a13       | Exon2 | N | 91106798  | 91106919  | 1 | 65.0 | 25.7 | 51.1 | 21.6 |
| chr5  | Rpl21         | Exon2 | N | 147646024 | 147646085 | 1 | 62.5 | 25.0 | 63.5 | 34.6 |
| chr3  | Dennd2d       | Exon2 | N | 106290769 | 106290881 | 2 | 86.4 | 35.6 | 73.5 | 45.1 |
| chr11 | Arsg          | Exon2 | N | 109347020 | 109347071 | 1 | 78.6 | 55.9 | 76.7 | 48.6 |
| chr2  | Obp2b         | Exon2 | N | 25593519  | 25593589  | 1 | 56.7 | 33.3 | 62.5 | 34.4 |
| chr1  | Dis3l2        | Exon2 | N | 88641916  | 88642073  | 1 | 93.7 | 65.2 | 84.3 | 56.2 |
| chr7  | Slx1b         | Exon2 | N | 133835442 | 133835569 | 1 | 68.2 | 45.8 | 89.5 | 61.5 |
| chr11 | Cntd1         | Exon2 | N | 101145035 | 101145206 | 1 | 24.0 | 3.3  | 32.7 | 5.1  |
| chr12 | Atxn7l1       | Exon2 | N | 34026786  | 34027060  | 1 | 88.2 | 54.8 | 89.8 | 62.6 |
| chr10 | Arhgap9       | Exon2 | N | 126762579 | 126762686 | 1 | 39.7 | 12.1 | 37.7 | 10.9 |
| chr13 | Dbn1          | Exon2 | N | 55576221  | 55576897  | 3 | 62.5 | 4.3  | 71.0 | 44.3 |
| chr17 | Safb          | Exon2 | N | 56733113  | 56733177  | 1 | 57.5 | 40.7 | 65.7 | 39.3 |
| chr19 | E030003E18Rik | Exon2 | N | 20627589  | 20627690  | 2 | 78.9 | 48.9 | 88.3 | 61.9 |
| chr6  | Clec4f        | Exon2 | N | 83596782  | 83596933  | 1 | 49.5 | 20.2 | 46.5 | 20.8 |
| chr13 | Slc12a7       | Exon2 | N | 73922492  | 73922614  | 1 | 77.1 | 59.1 | 80.2 | 54.5 |

|       |               |        |   |           |           |   |       |      |      |      |
|-------|---------------|--------|---|-----------|-----------|---|-------|------|------|------|
| chr11 | Peli1         | Exon2  | N | 21040567  | 21040696  | 1 | 66.7  | 47.8 | 71.1 | 46.1 |
| chr1  | Hnrnpu        | Exon2  | N | 180260296 | 180260477 | 1 | 29.4  | 4.0  | 33.6 | 8.6  |
| chr17 | Abca17        | Exon2  | N | 24402368  | 24402558  | 1 | 69.6  | 37.0 | 62.9 | 38.8 |
| chr3  | Pex11b        | Exon2  | N | 96441054  | 96441255  | 1 | 68.2  | 40.2 | 65.3 | 41.1 |
| chr5  | Mapk10        | Exon2  | N | 103357242 | 103357305 | 1 | 42.9  | 10.6 | 31.0 | 7.1  |
| chr19 | Ppp1r14b      | Exon2  | N | 7051348   | 7051380   | 1 | 25.0  | 7.4  | 29.3 | 5.4  |
| chr12 | 1700086L19Rik | Exon2  | N | 75389700  | 75389921  | 1 | 54.1  | 32.0 | 44.8 | 21.3 |
| chr11 | Gnb2l1        | Exon2  | N | 48615775  | 48615922  | 2 | 33.8  | 12.1 | 39.9 | 16.6 |
| chr7  | Pddc1         | Exon2  | N | 148595230 | 148595323 | 1 | 62.3  | 30.2 | 51.8 | 29.2 |
| chr8  | Ido2          | Exon2  | N | 25651066  | 25651117  | 1 | 74.3  | 50.6 | 85.3 | 62.7 |
| chr2  | Rin2          | Exon2  | N | 145648001 | 145648101 | 2 | 34.5  | 0.0  | 22.7 | 0.2  |
| chr5  | Reln          | Exon2  | N | 21402565  | 21402762  | 1 | 35.1  | 16.3 | 35.6 | 15.3 |
| chr11 | Dnajc7        | Exon2  | N | 100445525 | 100445677 | 1 | 70.9  | 55.3 | 81.7 | 61.4 |
| chr19 | Fam178a       | Exon2  | N | 45009423  | 45010156  | 4 | 73.2  | 34.5 | 71.5 | 51.3 |
| chr1  | Nek2          | Exon2  | N | 193646371 | 193646611 | 1 | 22.5  | 3.5  | 25.3 | 5.3  |
| chr5  | Hnrpd1        | Exon2  | N | 100465500 | 100465670 | 1 | 35.6  | 14.9 | 40.4 | 20.5 |
| chr8  | Pbx4          | Exon2  | N | 72388211  | 72388449  | 1 | 58.7  | 35.9 | 57.5 | 37.9 |
| chr5  | Rplp0         | Exon2  | N | 116010750 | 116011013 | 1 | 34.0  | 19.0 | 37.3 | 17.9 |
| chr6  | Retsat        | Exon2  | N | 72551470  | 72551711  | 1 | 75.7  | 47.9 | 74.7 | 55.6 |
| chr11 | 4732490B19Rik | Exon2  | N | 113070300 | 113070508 | 1 | 29.9  | 4.6  | 22.9 | 3.9  |
| chr15 | Tomm22        | Exon2  | N | 79502327  | 79502444  | 1 | 35.6  | 11.8 | 26.3 | 7.3  |
| chr2  | Bpifa2        | Exon2  | N | 153835503 | 153835644 | 1 | 56.9  | 38.6 | 63.4 | 44.4 |
| chr11 | Lig3          | Exon2  | N | 82598817  | 82598960  | 1 | 65.7  | 22.5 | 67.8 | 49.1 |
| chr13 | Mak           | Exon2  | N | 41127894  | 41127968  | 1 | 77.8  | 57.4 | 65.5 | 46.9 |
| chr2  | Ckap2l        | Exon2  | N | 129098233 | 129098293 | 1 | 65.5  | 27.3 | 61.2 | 43.6 |
| chr7  | Ccdc101       | Exon2  | N | 133807443 | 133807518 | 1 | 60.8  | 28.0 | 48.4 | 31.4 |
| chr9  | Taf1d         | Exon2  | N | 15112969  | 15113359  | 2 | 64.2  | 46.3 | 62.1 | 45.1 |
| chr2  | Wfdc6b        | Exon2  | N | 164442776 | 164442946 | 1 | 66.7  | 45.1 | 70.0 | 53.0 |
| chr2  | Tgm7          | Exon2  | N | 120921591 | 120921751 | 1 | 83.3  | 61.0 | 76.2 | 59.5 |
| chr5  | Tmem120a      | Exon2  | N | 136211940 | 136212004 | 2 | 85.8  | 56.0 | 92.6 | 75.9 |
| chr12 | lfrd1         | Exon2  | N | 40930884  | 40931012  | 1 | 90.7  | 72.9 | 91.7 | 75.2 |
| chr2  | Psmc3         | Exon2  | N | 90895136  | 90895261  | 1 | 76.9  | 57.7 | 78.1 | 61.9 |
| chr7  | Axl           | Exon2  | N | 26546424  | 26546583  | 1 | 88.0  | 72.1 | 92.5 | 76.4 |
| chr9  | Ncapd3        | Exon2  | N | 26844570  | 26844724  | 1 | 82.0  | 57.8 | 80.7 | 64.7 |
| chr17 | Zfp760        | Exon2  | N | 21846172  | 21846263  | 2 | 76.5  | 60.0 | 81.4 | 65.4 |
| chr3  | Skil          | Exon2  | N | 30996192  | 30996387  | 2 | 85.4  | 52.2 | 66.5 | 50.7 |
| chr9  | Usp2          | Exon2  | N | 43897215  | 43897265  | 1 | 46.9  | 17.5 | 25.0 | 9.2  |
| chr19 | Pcgf6         | Exon2  | N | 47114534  | 47114632  | 1 | 43.1  | 20.0 | 27.8 | 12.0 |
| chr10 | Poc1b         | Exon2  | N | 98587465  | 98587636  | 1 | 86.6  | 67.1 | 83.7 | 68.2 |
| chr15 | Mrpl13        | Exon2  | N | 55371678  | 55371764  | 1 | 27.3  | 9.8  | 15.4 | 0.0  |
| chr12 | Fam49a        | Exon2  | N | 12310987  | 12311128  | 2 | 100.0 | 48.4 | 83.0 | 67.6 |
| chr1  | Unc50         | Exon2  | N | 37489396  | 37489516  | 1 | 85.0  | 69.6 | 87.2 | 72.0 |
| chr11 | Cacng1        | Exon2  | N | 107567091 | 107567165 | 1 | 60.0  | 43.3 | 60.3 | 45.2 |
| chr9  | Acpl2         | Exon2  | N | 96739505  | 96739631  | 1 | 44.3  | 26.6 | 40.2 | 25.2 |
| chr1  | Astn1         | Exon2  | N | 160432179 | 160432572 | 2 | 50.7  | 24.1 | 61.2 | 46.2 |
| chr19 | Capn1         | Exon20 | N | 6014201   | 6014468   | 4 | 41.6  | 16.9 | 66.0 | 14.5 |
| chr7  | Herc2         | Exon20 | N | 63376915  | 63377099  | 1 | 88.1  | 58.3 | 76.0 | 54.0 |
| chr9  | Trank1        | Exon20 | N | 111296262 | 111296360 | 1 | 67.8  | 35.6 | 54.1 | 33.0 |
| chr9  | Sorl1         | Exon20 | N | 41812069  | 41812200  | 1 | 80.9  | 56.2 | 84.3 | 64.3 |

|       |               |        |   |           |           |   |      |      |      |      |
|-------|---------------|--------|---|-----------|-----------|---|------|------|------|------|
| chr14 | Ttc18         | Exon20 | N | 21251146  | 21251245  | 1 | 28.7 | 5.4  | 21.2 | 1.2  |
| chr15 | Rapgef3       | Exon20 | N | 97589756  | 97589816  | 1 | 90.0 | 61.5 | 75.0 | 57.6 |
| chr10 | Cabin1        | Exon21 | N | 75200066  | 75200260  | 1 | 51.1 | 0.0  | 68.4 | 0.5  |
| chr19 | Plce1         | Exon21 | N | 38833305  | 38833436  | 1 | 43.9 | 20.0 | 63.3 | 11.5 |
| chr8  | Slc12a4       | Exon21 | N | 108483258 | 108483389 | 1 | 44.5 | 2.7  | 45.6 | 2.7  |
| chr1  | Pik3c2b       | Exon21 | N | 134990233 | 134990362 | 1 | 50.0 | 11.1 | 65.4 | 25.6 |
| chr15 | Col14a1       | Exon21 | N | 55254936  | 55255085  | 1 | 77.3 | 61.9 | 74.6 | 54.2 |
| chr10 | Stab2         | Exon21 | N | 86335342  | 86335488  | 1 | 56.2 | 39.2 | 54.5 | 35.6 |
| chr8  | Pkd1l3        | Exon21 | N | 112172404 | 112172638 | 1 | 86.4 | 46.2 | 78.4 | 61.3 |
| chr1  | Adcy10        | Exon22 | N | 167486880 | 167487111 | 1 | 57.9 | 38.9 | 63.8 | 23.1 |
| chr8  | Slc12a4       | Exon22 | N | 108484576 | 108484670 | 1 | 73.1 | 41.8 | 91.1 | 52.9 |
| chr5  | Pitpnm2       | Exon22 | N | 124602553 | 124602728 | 2 | 47.4 | 13.6 | 55.7 | 27.2 |
| chr13 | Itga2         | Exon23 | N | 115667829 | 115667977 | 1 | 67.1 | 17.8 | 63.1 | 25.0 |
| chr10 | Mon2          | Exon23 | N | 122469579 | 122469805 | 1 | 75.0 | 37.8 | 68.1 | 32.7 |
| chr1  | Als2          | Exon23 | N | 59253035  | 59253215  | 1 | 76.9 | 57.1 | 85.4 | 57.1 |
| chr8  | Ank1          | Exon23 | N | 24222282  | 24222360  | 1 | 60.5 | 40.4 | 66.3 | 50.0 |
| chr10 | Stab2         | Exon24 | N | 86341575  | 86341694  | 1 | 50.6 | 6.4  | 54.6 | 1.8  |
| chr2  | Itgav         | Exon24 | N | 83636243  | 83636401  | 1 | 96.4 | 56.7 | 87.1 | 59.8 |
| chr14 | Abcc4         | Exon24 | N | 119028840 | 119028965 | 1 | 79.4 | 52.8 | 77.9 | 54.0 |
| chr19 | Abcc2         | Exon24 | N | 43901074  | 43901273  | 1 | 58.9 | 33.2 | 53.0 | 33.0 |
| chr11 | Myh10         | Exon24 | N | 68605365  | 68605536  | 1 | 29.9 | 5.8  | 23.0 | 5.6  |
| chr9  | Nfrkb         | Exon24 | N | 31227399  | 31227534  | 1 | 78.0 | 59.0 | 77.4 | 60.9 |
| chr6  | Vwf           | Exon24 | N | 125587398 | 125587554 | 1 | 81.7 | 62.7 | 82.3 | 66.7 |
| chr8  | Kcnu1         | Exon25 | N | 27044877  | 27044989  | 1 | 63.3 | 2.9  | 57.7 | 5.2  |
| chr7  | Usp47         | Exon25 | N | 119250293 | 119250423 | 1 | 76.2 | 58.3 | 76.4 | 53.6 |
| chr2  | Plcb1         | Exon26 | N | 135196157 | 135196337 | 1 | 45.2 | 3.9  | 58.7 | 7.3  |
| chr5  | Stag3         | Exon26 | N | 138745270 | 138745418 | 1 | 56.9 | 26.9 | 57.5 | 27.6 |
| chr11 | Abca9         | Exon26 | N | 110006805 | 110006980 | 1 | 86.0 | 57.8 | 82.5 | 54.3 |
| chr13 | Zcchc6        | Exon26 | N | 59922921  | 59923471  | 4 | 53.8 | 16.5 | 68.3 | 40.4 |
| chr7  | Kndc1         | Exon26 | N | 147118742 | 147118892 | 1 | 90.9 | 72.7 | 97.2 | 81.3 |
| chr12 | Greb1         | Exon27 | N | 16730097  | 16730240  | 1 | 22.0 | 0.0  | 26.3 | 0.0  |
| chr1  | Aox3l1        | Exon27 | N | 58403069  | 58403197  | 1 | 19.3 | 0.0  | 21.5 | 0.0  |
| chr19 | Col17a1       | Exon27 | N | 47738293  | 47738346  | 1 | 83.9 | 63.8 | 83.5 | 63.9 |
| chr10 | Utrn          | Exon27 | N | 12360725  | 12360842  | 1 | 87.5 | 40.7 | 87.1 | 69.7 |
| chr4  | Fhad1         | Exon27 | N | 141538063 | 141538305 | 2 | 36.6 | 16.8 | 32.1 | 16.5 |
| chr1  | Cacna1s       | Exon28 | N | 138001147 | 138001203 | 1 | 55.4 | 13.8 | 62.7 | 33.7 |
| chr7  | Herc2         | Exon29 | N | 63390856  | 63391051  | 1 | 40.7 | 0.8  | 53.9 | 2.5  |
| chr1  | Clasp1        | Exon29 | N | 120456563 | 120456706 | 1 | 65.9 | 36.8 | 80.6 | 41.1 |
| chr17 | Itpr3         | Exon29 | N | 27243151  | 27243351  | 1 | 48.3 | 5.2  | 41.5 | 5.3  |
| chr9  | Col5a3        | Exon29 | N | 20590017  | 20590070  | 1 | 79.5 | 63.4 | 79.6 | 62.9 |
| chr19 | Fads2         | Exon3  | N | 10140742  | 10140838  | 1 | 85.0 | 4.3  | 73.8 | 0.0  |
| chr9  | Nr2e3         | Exon3  | N | 59796170  | 59796327  | 1 | 72.4 | 4.7  | 78.4 | 14.3 |
| chr13 | Pde8b         | Exon3  | N | 95802785  | 95802905  | 1 | 65.0 | 8.2  | 65.7 | 4.4  |
| chr12 | Nfkbia        | Exon3  | N | 56592107  | 56592317  | 1 | 67.4 | 12.5 | 61.0 | 8.8  |
| chr7  | Kcne3         | Exon3  | N | 107331243 | 107331333 | 1 | 45.2 | 16.5 | 64.0 | 13.2 |
| chr11 | Chmp6         | Exon3  | N | 119777339 | 119777425 | 1 | 65.4 | 35.1 | 73.2 | 23.1 |
| chr8  | Col4a1        | Exon3  | N | 11206226  | 11206403  | 1 | 87.1 | 50.0 | 90.0 | 43.5 |
| chr17 | Epcam         | Exon3  | N | 88039628  | 88039868  | 1 | 79.4 | 21.5 | 68.3 | 23.5 |
| chr5  | 9130230L23Rik | Exon3  | N | 66391444  | 66391694  | 1 | 17.6 | 1.1  | 44.8 | 2.5  |

|       |               |       |   |           |           |   |      |      |      |      |
|-------|---------------|-------|---|-----------|-----------|---|------|------|------|------|
| chr7  | Nlrp6         | Exon3 | N | 148108309 | 148110055 | 3 | 59.4 | 5.6  | 50.9 | 9.9  |
| chr15 | Twf1          | Exon3 | N | 94413181  | 94413306  | 1 | 52.0 | 25.0 | 58.7 | 23.9 |
| chr16 | Rpl35a        | Exon3 | N | 33058765  | 33058909  | 1 | 77.3 | 46.1 | 74.4 | 40.1 |
| chr15 | Krt71         | Exon3 | N | 101568377 | 101568502 | 1 | 68.0 | 24.6 | 62.8 | 29.2 |
| chr11 | Plekhm1       | Exon3 | N | 103232176 | 103232369 | 1 | 87.5 | 45.7 | 84.2 | 50.8 |
| chr7  | Asb7          | Exon3 | N | 73826591  | 73826694  | 1 | 73.1 | 32.4 | 70.3 | 37.0 |
| chr7  | Ptpre         | Exon3 | N | 142843436 | 142843529 | 2 | 61.0 | 7.8  | 35.7 | 3.1  |
| chr3  | Ctso          | Exon3 | N | 81748784  | 81748951  | 1 | 88.2 | 52.5 | 88.3 | 56.4 |
| chr1  | Vil1          | Exon3 | N | 74464934  | 74465130  | 1 | 90.1 | 74.8 | 87.2 | 56.5 |
| chr2  | Tnfaip6       | Exon3 | N | 51906363  | 51906591  | 1 | 67.5 | 41.9 | 63.5 | 32.8 |
| chr1  | Cacybp        | Exon3 | N | 162136744 | 162136840 | 1 | 63.6 | 40.4 | 71.4 | 42.4 |
| chr10 | Vnn3          | Exon3 | N | 23584144  | 23584435  | 1 | 85.3 | 59.0 | 86.6 | 58.5 |
| chr4  | Txn1          | Exon3 | N | 57964669  | 57964773  | 1 | 36.8 | 0.0  | 27.8 | 0.0  |
| chr5  | Lrrc66        | Exon3 | N | 74020770  | 74021249  | 3 | 40.8 | 6.0  | 29.2 | 1.6  |
| chr3  | Rps3a1        | Exon3 | N | 85945161  | 85945348  | 2 | 33.2 | 6.7  | 36.9 | 10.1 |
| chr11 | 4930401O10Rik | Exon3 | N | 71753075  | 71753281  | 1 | 82.8 | 60.7 | 78.3 | 52.4 |
| chr4  | Lck           | Exon3 | N | 129229192 | 129229268 | 1 | 56.0 | 38.2 | 83.3 | 57.9 |
| chr7  | Rpl18         | Exon3 | N | 52975290  | 52975388  | 1 | 71.4 | 44.0 | 74.0 | 49.6 |
| chr17 | Fez2          | Exon3 | N | 78799970  | 78800238  | 1 | 89.3 | 52.9 | 83.4 | 59.0 |
| chr4  | Esrp1         | Exon3 | N | 11280442  | 11280610  | 1 | 25.2 | 2.7  | 30.3 | 5.9  |
| chr2  | Rnf114        | Exon3 | N | 167332547 | 167332697 | 1 | 84.1 | 50.3 | 81.8 | 57.4 |
| chr1  | Nek7          | Exon3 | N | 140412202 | 140412309 | 1 | 16.7 | 0.0  | 27.9 | 3.8  |
| chr16 | App           | Exon3 | N | 84971653  | 84971706  | 2 | 68.9 | 53.7 | 79.3 | 56.2 |
| chr13 | 4933433G19Rik | Exon3 | N | 67104075  | 67104205  | 1 | 92.9 | 56.5 | 82.4 | 59.3 |
| chr8  | Chd9          | Exon3 | N | 93480282  | 93480613  | 2 | 36.9 | 12.9 | 35.3 | 12.5 |
| chr11 | Smurf2        | Exon3 | N | 106689818 | 106689938 | 1 | 45.4 | 1.2  | 34.5 | 11.8 |
| chr4  | Slc26a7       | Exon3 | N | 14437294  | 14437394  | 1 | 36.5 | 13.0 | 35.6 | 14.6 |
| chr10 | Tpd52l1       | Exon3 | N | 31066417  | 31066518  | 1 | 92.8 | 71.8 | 92.6 | 71.6 |
| chr7  | Tjp1          | Exon3 | N | 72447630  | 72448104  | 2 | 77.5 | 36.8 | 68.9 | 48.1 |
| chr6  | Cd27          | Exon3 | N | 125184533 | 125184712 | 1 | 33.3 | 14.0 | 32.0 | 12.0 |
| chr3  | Gpr89         | Exon3 | N | 96679551  | 96679646  | 1 | 91.4 | 28.8 | 66.9 | 47.2 |
| chr3  | Setd7         | Exon3 | N | 51336897  | 51336978  | 1 | 85.3 | 49.2 | 79.5 | 59.9 |
| chr11 | Cldn7         | Exon3 | N | 69780722  | 69780806  | 2 | 27.7 | 9.0  | 31.4 | 12.4 |
| chr18 | Rpl17         | Exon3 | N | 75161320  | 75161454  | 2 | 27.1 | 9.1  | 26.7 | 8.0  |
| chr15 | Mapk11        | Exon3 | N | 88975526  | 88975605  | 1 | 80.5 | 47.9 | 78.0 | 59.6 |
| chr4  | Pla2g2c       | Exon3 | N | 138290177 | 138290321 | 1 | 46.7 | 5.3  | 24.8 | 6.3  |
| chr7  | Ccp110        | Exon3 | N | 125861481 | 125861609 | 1 | 92.1 | 75.7 | 92.3 | 74.1 |
| chr9  | Bsn           | Exon3 | N | 108006275 | 108006406 | 1 | 52.1 | 33.8 | 62.5 | 44.3 |
| chr9  | Ldlr          | Exon3 | N | 21537935  | 21538318  | 2 | 85.2 | 64.2 | 68.0 | 50.3 |
| chr18 | Slc14a2       | Exon3 | N | 78352246  | 78352393  | 1 | 65.6 | 49.6 | 56.3 | 38.6 |
| chr17 | Sod2          | Exon3 | N | 13206299  | 13206478  | 1 | 50.0 | 24.1 | 48.6 | 31.6 |
| chr1  | Mrpl15        | Exon3 | N | 4774032   | 4774186   | 1 | 84.1 | 55.3 | 76.3 | 59.3 |
| chr10 | Arhgap9       | Exon3 | N | 126762900 | 126762958 | 1 | 87.5 | 66.7 | 79.2 | 62.5 |
| chr3  | Efna1         | Exon3 | N | 89080052  | 89080347  | 2 | 82.8 | 59.4 | 78.8 | 62.2 |
| chr6  | Cd9           | Exon3 | N | 125412345 | 125412443 | 1 | 93.2 | 71.7 | 92.5 | 75.9 |
| chr5  | Trmt44        | Exon3 | N | 35908010  | 35908193  | 1 | 50.6 | 7.0  | 27.7 | 11.4 |
| chr11 | Rpl38         | Exon3 | N | 114533048 | 114533170 | 1 | 77.8 | 37.1 | 50.8 | 34.7 |
| chr8  | Adam18        | Exon3 | N | 25736259  | 25736339  | 1 | 29.5 | 0.0  | 30.2 | 14.1 |
| chr4  | H6pd          | Exon3 | N | 149369854 | 149370490 | 3 | 72.0 | 47.7 | 67.0 | 51.4 |

|       |               |        |   |           |           |   |      |      |      |      |
|-------|---------------|--------|---|-----------|-----------|---|------|------|------|------|
| chr7  | Ccdc101       | Exon3  | N | 133808430 | 133808502 | 1 | 37.9 | 11.9 | 25.5 | 9.9  |
| chr11 | Nipsnap1      | Exon3  | N | 4784025   | 4784119   | 1 | 28.6 | 4.3  | 17.2 | 1.8  |
| chr5  | AW549542      | Exon3  | N | 120024531 | 120025670 | 6 | 60.3 | 37.5 | 51.0 | 35.7 |
| chr15 | Parvb         | Exon3  | N | 84113192  | 84113294  | 1 | 73.8 | 55.9 | 76.2 | 60.9 |
| chr6  | Mat2a         | Exon3  | N | 72385805  | 72386023  | 1 | 91.9 | 75.7 | 86.6 | 71.4 |
| chr6  | Atn1          | Exon3  | N | 124694738 | 124695434 | 1 | 97.4 | 73.2 | 85.1 | 70.0 |
| chr9  | Sorl1         | Exon30 | N | 41843526  | 41843657  | 1 | 60.8 | 34.7 | 71.4 | 28.6 |
| chr6  | Pzp           | Exon30 | N | 128472034 | 128472202 | 1 | 78.9 | 62.7 | 70.7 | 43.8 |
| chr10 | Ptprq         | Exon30 | N | 107104397 | 107104579 | 1 | 84.5 | 51.1 | 85.4 | 65.0 |
| chr7  | Tenm4         | Exon31 | N | 104051355 | 104051497 | 1 | 47.3 | 13.8 | 50.0 | 9.0  |
| chr10 | Mon2          | Exon32 | N | 122489241 | 122489368 | 1 | 40.4 | 0.0  | 23.5 | 0.0  |
| chr2  | Cubn          | Exon33 | N | 13279746  | 13279856  | 1 | 33.3 | 3.8  | 51.0 | 13.5 |
| chr19 | Myof          | Exon33 | N | 38034204  | 38034328  | 1 | 66.0 | 43.6 | 79.6 | 43.0 |
| chr14 | Tep1          | Exon34 | N | 51465091  | 51465215  | 1 | 67.6 | 13.2 | 60.4 | 7.7  |
| chr16 | Urb1          | Exon34 | N | 90800265  | 90800361  | 1 | 87.9 | 72.1 | 87.8 | 70.7 |
| chr2  | Ubr3          | Exon35 | N | 69856450  | 69856629  | 1 | 74.2 | 50.0 | 83.1 | 51.0 |
| chr4  | Unc13b        | Exon36 | N | 43272334  | 43272481  | 1 | 36.7 | 5.9  | 20.8 | 2.3  |
| chr14 | Wdfy4         | Exon38 | N | 33914689  | 33914800  | 1 | 82.6 | 53.1 | 77.0 | 53.6 |
| chr10 | Syne1         | Exon38 | N | 5274338   | 5274504   | 1 | 82.7 | 58.8 | 76.7 | 58.7 |
| chr7  | Muc5ac        | Exon38 | N | 149000359 | 149000449 | 1 | 85.2 | 62.5 | 78.1 | 61.8 |
| chr19 | Fads2         | Exon4  | N | 10141005  | 10141102  | 1 | 61.0 | 17.7 | 59.5 | 1.6  |
| chr9  | Cep63         | Exon4  | N | 102498452 | 102498649 | 1 | 43.9 | 7.3  | 57.3 | 0.0  |
| chr13 | 2010111101Rik | Exon4  | N | 63257906  | 63258095  | 1 | 48.2 | 28.1 | 67.8 | 12.6 |
| chr7  | Sphk2         | Exon4  | N | 52968630  | 52969098  | 3 | 59.6 | 14.5 | 65.2 | 16.6 |
| chr2  | Il1b          | Exon4  | N | 129195439 | 129195487 | 1 | 82.7 | 46.6 | 75.5 | 30.3 |
| chr5  | 1700028K03Rik | Exon4  | N | 107975220 | 107975298 | 1 | 54.2 | 10.9 | 46.6 | 3.4  |
| chr4  | Ptch2         | Exon4  | N | 116777839 | 116777930 | 1 | 86.5 | 42.9 | 80.0 | 37.2 |
| chr4  | Plekhg5       | Exon4  | N | 151477860 | 151477951 | 1 | 75.7 | 35.9 | 83.0 | 40.8 |
| chr5  | Srpk2         | Exon4  | N | 23024437  | 23024537  | 1 | 75.0 | 5.7  | 61.8 | 19.8 |
| chr8  | Plekha2       | Exon4  | N | 26168205  | 26168273  | 1 | 85.6 | 24.3 | 87.3 | 46.1 |
| chr8  | Glt25d1       | Exon4  | N | 74141974  | 74142178  | 1 | 78.1 | 42.9 | 86.9 | 46.5 |
| chr10 | Ostm1         | Exon4  | N | 42417914  | 42418079  | 1 | 53.6 | 10.0 | 55.3 | 16.7 |
| chr2  | Gbgt1         | Exon4  | N | 28357717  | 28357752  | 1 | 55.2 | 23.1 | 67.9 | 29.6 |
| chr5  | Plbd2         | Exon4  | N | 120937681 | 120937776 | 1 | 60.3 | 34.5 | 69.0 | 31.4 |
| chr8  | lfi30         | Exon4  | N | 73288618  | 73288662  | 1 | 60.9 | 41.7 | 66.7 | 30.0 |
| chr1  | Atp1b1        | Exon4  | N | 166383620 | 166383748 | 1 | 30.0 | 1.5  | 38.2 | 3.3  |
| chr12 | Serpina1f     | Exon4  | N | 104932807 | 104932899 | 1 | 84.6 | 43.3 | 67.6 | 33.3 |
| chr13 | Sgtb          | Exon4  | N | 104914270 | 104914369 | 1 | 58.0 | 11.3 | 61.7 | 27.8 |
| chr2  | 9830001H06Rik | Exon4  | N | 156853123 | 156853374 | 1 | 81.0 | 57.8 | 84.0 | 51.3 |
| chr17 | Flot1         | Exon4  | N | 35961511  | 35961654  | 1 | 90.9 | 68.6 | 90.6 | 59.3 |
| chr18 | Htr4          | Exon4  | N | 62587677  | 62587830  | 1 | 31.1 | 14.4 | 45.1 | 14.1 |
| chr17 | Slc22a1       | Exon4  | N | 12852412  | 12852626  | 1 | 61.8 | 3.2  | 32.6 | 2.8  |
| chr1  | Nit1          | Exon4  | N | 173274419 | 173274670 | 2 | 66.4 | 48.6 | 58.8 | 29.9 |
| chr1  | 2310007B03Rik | Exon4  | N | 95056178  | 95056927  | 5 | 50.0 | 10.1 | 40.5 | 13.5 |
| chr11 | Ppp1r1b       | Exon4  | N | 98216641  | 98216823  | 3 | 77.7 | 51.8 | 75.1 | 48.6 |
| chr8  | Slc12a3       | Exon4  | N | 96857433  | 96857572  | 1 | 30.4 | 1.8  | 28.7 | 2.3  |
| chr4  | Acer2         | Exon4  | N | 86557520  | 86557657  | 1 | 51.2 | 7.8  | 47.8 | 22.7 |
| chr8  | B930025P03Rik | Exon4  | N | 10879782  | 10879985  | 1 | 30.2 | 9.8  | 31.3 | 7.1  |
| chr10 | Slc5a4a       | Exon4  | N | 75619763  | 75619867  | 1 | 80.7 | 50.0 | 74.8 | 51.5 |

|       |               |        |   |           |           |   |      |      |      |      |
|-------|---------------|--------|---|-----------|-----------|---|------|------|------|------|
| chr11 | Hnrnp1        | Exon4  | N | 50194961  | 50195099  | 1 | 41.8 | 11.4 | 32.9 | 10.5 |
| chr4  | Zc3h12a       | Exon4  | N | 124803850 | 124804326 | 3 | 79.8 | 60.6 | 80.8 | 58.7 |
| chr11 | E230016K23Rik | Exon4  | N | 83424625  | 83424724  | 1 | 59.0 | 7.5  | 47.2 | 25.5 |
| chr11 | Sap30bp       | Exon4  | N | 115818675 | 115818763 | 1 | 43.6 | 7.8  | 32.7 | 11.1 |
| chr11 | Eif5a         | Exon4  | N | 69732653  | 69732838  | 2 | 67.6 | 44.0 | 72.4 | 51.1 |
| chr16 | Ets2          | Exon4  | N | 95933693  | 95933893  | 1 | 85.7 | 65.6 | 76.2 | 55.1 |
| chr1  | Rpl7          | Exon4  | N | 16093249  | 16093415  | 1 | 79.2 | 43.3 | 69.6 | 48.5 |
| chr19 | Cyb561a3      | Exon4  | N | 10659672  | 10659880  | 1 | 27.5 | 1.4  | 23.9 | 2.9  |
| chr1  | Npl           | Exon4  | N | 155362532 | 155362680 | 1 | 68.6 | 28.4 | 74.7 | 54.1 |
| chr18 | Stard4        | Exon4  | N | 33368697  | 33368811  | 1 | 86.7 | 67.6 | 87.6 | 67.5 |
| chr9  | Sesn3         | Exon4  | N | 14118940  | 14119176  | 1 | 91.1 | 72.3 | 90.2 | 70.3 |
| chr2  | Mapk8ip1      | Exon4  | N | 92225570  | 92225679  | 1 | 71.2 | 46.7 | 67.6 | 48.2 |
| chr14 | Mettl6        | Exon4  | N | 32306783  | 32307150  | 2 | 81.5 | 60.0 | 86.4 | 67.1 |
| chr3  | Schip1        | Exon4  | N | 68421533  | 68421730  | 1 | 91.1 | 52.8 | 78.0 | 59.0 |
| chr12 | Entpd5        | Exon4  | N | 85725169  | 85725270  | 1 | 98.0 | 67.2 | 92.7 | 74.3 |
| chr1  | Ilkap         | Exon4  | N | 93279881  | 93279968  | 1 | 90.5 | 71.0 | 90.3 | 72.0 |
| chr2  | Acot8         | Exon4  | N | 164628497 | 164628633 | 1 | 81.3 | 65.3 | 86.9 | 68.7 |
| chr5  | Pi4k2b        | Exon4  | N | 53144335  | 53144488  | 1 | 83.6 | 47.6 | 81.5 | 63.6 |
| chr7  | Ech1          | Exon4  | N | 29615021  | 29615069  | 1 | 95.7 | 68.3 | 93.1 | 75.6 |
| chr11 | Sfn5          | Exon4  | N | 82773507  | 82774230  | 5 | 78.7 | 58.6 | 73.4 | 56.5 |
| chr7  | Mboat7        | Exon4  | N | 3642864   | 3642990   | 1 | 54.5 | 27.3 | 35.8 | 19.0 |
| chr11 | Myo15         | Exon4  | N | 60296539  | 60296648  | 1 | 78.1 | 56.4 | 76.7 | 59.9 |
| chr10 | Cpm           | Exon4  | N | 117107223 | 117107407 | 1 | 90.0 | 73.8 | 87.8 | 71.1 |
| chr2  | Ncs1          | Exon4  | N | 31139667  | 31139755  | 1 | 68.6 | 52.8 | 66.5 | 51.0 |
| chr12 | 2700097O09Rik | Exon4  | N | 56160444  | 56160565  | 1 | 82.5 | 54.3 | 83.5 | 68.1 |
| chr7  | Muc2          | Exon41 | N | 148938582 | 148938680 | 1 | 49.2 | 19.6 | 46.4 | 22.6 |
| chr12 | Eml5          | Exon41 | N | 100120186 | 100120284 | 1 | 78.4 | 52.4 | 71.9 | 54.4 |
| chr18 | Lama3         | Exon44 | N | 12683015  | 12683125  | 1 | 90.7 | 31.6 | 88.7 | 58.3 |
| chr9  | Sorl1         | Exon45 | N | 41907228  | 41907353  | 1 | 92.5 | 75.9 | 88.0 | 66.7 |
| chr5  | Zan           | Exon49 | N | 137867392 | 137867533 | 1 | 50.9 | 29.6 | 51.3 | 34.2 |
| chr9  | Nr2e3         | Exon5  | N | 59796732  | 59796835  | 1 | 87.5 | 20.2 | 94.3 | 16.7 |
| chr3  | Car14         | Exon5  | N | 95703663  | 95703729  | 1 | 55.6 | 11.6 | 67.3 | 8.7  |
| chr4  | Trit1         | Exon5  | N | 122726012 | 122726123 | 1 | 32.9 | 0.0  | 56.5 | 0.0  |
| chr1  | Rgs1          | Exon5  | N | 155641218 | 155641356 | 1 | 30.0 | 7.1  | 58.0 | 9.5  |
| chr7  | Ceacam1       | Exon5  | N | 26258817  | 26259071  | 1 | 54.5 | 12.6 | 57.5 | 10.4 |
| chr9  | Fbxo22        | Exon5  | N | 55068829  | 55068994  | 1 | 89.6 | 26.9 | 82.3 | 36.1 |
| chr3  | Adam15        | Exon5  | N | 89145859  | 89145997  | 1 | 87.1 | 54.2 | 91.7 | 47.2 |
| chr13 | Adtrp         | Exon5  | N | 41923512  | 41923754  | 2 | 60.5 | 2.4  | 48.6 | 4.6  |
| chr9  | Arih2         | Exon5  | N | 108512109 | 108512130 | 1 | 87.0 | 50.0 | 94.2 | 52.1 |
| chr2  | Tcp1111       | Exon5  | N | 104537667 | 104537887 | 1 | 74.4 | 33.8 | 65.9 | 27.8 |
| chr13 | Aldh5a1       | Exon5  | N | 25011548  | 25011691  | 1 | 67.8 | 52.5 | 81.9 | 45.1 |
| chr8  | Tlr3          | Exon5  | N | 46495150  | 46495344  | 2 | 61.9 | 8.3  | 53.8 | 17.7 |
| chr1  | Sccpdh        | Exon5  | N | 181609716 | 181609846 | 1 | 63.6 | 39.6 | 74.0 | 38.7 |
| chr4  | Tspan1        | Exon5  | N | 115836924 | 115837130 | 1 | 78.5 | 32.2 | 71.2 | 37.7 |
| chr13 | 4933425L06Rik | Exon5  | N | 105908731 | 105908878 | 1 | 79.5 | 35.4 | 62.6 | 30.7 |
| chr10 | Mtrf1l        | Exon5  | N | 4532364   | 4532500   | 1 | 55.5 | 25.6 | 75.8 | 45.2 |
| chr17 | BC004004      | Exon5  | N | 29431220  | 29431359  | 1 | 38.1 | 4.0  | 33.1 | 3.1  |
| chr7  | 4732471J01Rik | Exon5  | N | 26316310  | 26316481  | 1 | 86.6 | 52.0 | 82.0 | 52.8 |
| chr9  | Mns1          | Exon5  | N | 72296958  | 72297174  | 1 | 89.1 | 70.3 | 93.4 | 65.8 |

|       |           |        |   |           |           |   |      |      |       |      |
|-------|-----------|--------|---|-----------|-----------|---|------|------|-------|------|
| chr8  | Tex29     | Exon5  | N | 11854976  | 11855038  | 1 | 84.0 | 44.4 | 82.8  | 55.6 |
| chr3  | Slc25a24  | Exon5  | N | 108961416 | 108961562 | 1 | 20.8 | 5.5  | 26.9  | 1.0  |
| chr7  | Il18bp    | Exon5  | N | 109166111 | 109166178 | 1 | 37.2 | 2.3  | 25.4  | 0.0  |
| chr5  | Fastk     | Exon5  | N | 23948000  | 23948213  | 1 | 75.6 | 40.0 | 67.3  | 43.5 |
| chr7  | Sphk2     | Exon5  | N | 52972363  | 52972433  | 1 | 67.5 | 9.1  | 54.8  | 31.0 |
| chr1  | Cyp27a1   | Exon5  | N | 74783255  | 74783421  | 1 | 73.4 | 51.7 | 74.1  | 51.0 |
| chr15 | Zfpm2     | Exon5  | N | 40927605  | 40927811  | 1 | 67.1 | 25.0 | 52.3  | 30.7 |
| chr7  | Wtip      | Exon5  | N | 34904158  | 34904225  | 1 | 51.9 | 27.3 | 47.5  | 26.1 |
| chr10 | Pmel      | Exon5  | N | 128152983 | 128153606 | 3 | 88.0 | 72.6 | 91.6  | 70.3 |
| chr1  | Arpc2     | Exon5  | N | 74302532  | 74302625  | 1 | 72.7 | 17.9 | 49.1  | 29.3 |
| chr3  | Med12l    | Exon5  | N | 58875737  | 58875847  | 1 | 64.5 | 42.9 | 62.1  | 42.7 |
| chr8  | Eri1      | Exon5  | N | 36554255  | 36554433  | 1 | 74.9 | 42.4 | 73.8  | 54.3 |
| chr10 | Ankrd52   | Exon5  | N | 127817637 | 127817724 | 1 | 73.9 | 38.6 | 69.9  | 50.6 |
| chr7  | Ech1      | Exon5  | N | 29615233  | 29615297  | 1 | 91.0 | 67.1 | 74.2  | 55.6 |
| chr2  | Mavs      | Exon5  | N | 131070939 | 131071405 | 2 | 82.1 | 54.5 | 85.1  | 66.5 |
| chr7  | Bcam      | Exon5  | N | 20345396  | 20345537  | 1 | 20.7 | 5.4  | 20.2  | 1.7  |
| chr9  | Layn      | Exon5  | N | 50881953  | 50882250  | 1 | 63.7 | 41.7 | 67.7  | 49.6 |
| chr5  | Amz1      | Exon5  | N | 141224569 | 141224741 | 1 | 70.3 | 43.3 | 71.2  | 53.7 |
| chr6  | Glcci1    | Exon5  | N | 8532580   | 8532790   | 1 | 77.0 | 43.4 | 74.3  | 57.2 |
| chr11 | Slc35b1   | Exon5  | N | 95250394  | 95250520  | 1 | 50.0 | 19.4 | 43.9  | 27.5 |
| chr5  | Tmem132d  | Exon5  | N | 128464611 | 128464794 | 1 | 82.8 | 67.7 | 69.9  | 54.8 |
| chr1  | Dnah7a    | Exon54 | N | 53692838  | 53693021  | 1 | 61.1 | 33.3 | 74.7  | 9.7  |
| chr5  | Plb1      | Exon55 | N | 32657159  | 32657263  | 1 | 89.5 | 68.0 | 85.6  | 54.9 |
| chr12 | Snx6      | Exon6  | N | 55864607  | 55864712  | 1 | 83.8 | 4.9  | 81.6  | 9.1  |
| chr13 | Aldh5a1   | Exon6  | N | 25015836  | 25015952  | 1 | 74.4 | 7.2  | 61.5  | 2.1  |
| chr9  | Pstpip1   | Exon6  | N | 55971069  | 55971167  | 1 | 75.5 | 20.8 | 72.2  | 17.9 |
| chr11 | Ttc25     | Exon6  | N | 100415178 | 100415385 | 1 | 49.1 | 17.0 | 64.2  | 13.5 |
| chr15 | Gsdmcl-ps | Exon6  | N | 63753956  | 63754003  | 1 | 72.7 | 25.0 | 71.4  | 20.9 |
| chr2  | Mertk     | Exon6  | N | 128584779 | 128584962 | 1 | 96.9 | 59.1 | 92.8  | 44.9 |
| chr5  | Fbxo21    | Exon6  | N | 118440812 | 118440948 | 1 | 68.2 | 33.9 | 78.1  | 31.2 |
| chr9  | Ifrd2     | Exon6  | N | 107493263 | 107493441 | 1 | 61.6 | 15.8 | 66.7  | 21.2 |
| chr2  | Cat       | Exon6  | N | 103307851 | 103308042 | 1 | 74.6 | 15.1 | 69.6  | 25.2 |
| chr14 | Ddhd1     | Exon6  | N | 46230167  | 46230429  | 1 | 90.2 | 46.5 | 87.2  | 45.5 |
| chr2  | Ehf       | Exon6  | N | 103119675 | 103119920 | 1 | 63.6 | 20.1 | 52.5  | 12.6 |
| chr9  | Mns1      | Exon6  | N | 72297259  | 72297366  | 1 | 82.9 | 14.8 | 59.0  | 21.2 |
| chr14 | Asb14     | Exon6  | N | 27724483  | 27724654  | 1 | 54.2 | 31.1 | 69.8  | 32.7 |
| chr2  | Hsd17b12  | Exon6  | N | 93906566  | 93906630  | 1 | 83.8 | 43.1 | 78.4  | 41.4 |
| chr17 | Synj2     | Exon6  | N | 6007938   | 6008110   | 1 | 88.6 | 67.6 | 93.8  | 59.9 |
| chr8  | Edc4      | Exon6  | N | 108410219 | 108410323 | 1 | 84.4 | 64.4 | 91.7  | 58.3 |
| chr7  | Arrdc4    | Exon6  | N | 75890031  | 75890097  | 1 | 64.6 | 43.5 | 65.8  | 32.5 |
| chr3  | Gstm2     | Exon6  | N | 107788952 | 107789027 | 1 | 77.9 | 18.8 | 53.3  | 20.3 |
| chr11 | Mtmr3     | Exon6  | N | 4392722   | 4392917   | 1 | 81.3 | 36.4 | 77.5  | 44.9 |
| chr11 | Tsr1      | Exon6  | N | 74715511  | 74715668  | 1 | 53.8 | 27.7 | 58.2  | 27.6 |
| chr14 | Clu       | Exon6  | N | 66598488  | 66598717  | 1 | 71.2 | 34.4 | 71.8  | 41.2 |
| chr14 | Tmem110   | Exon6  | N | 31685736  | 31685885  | 1 | 79.2 | 28.3 | 72.4  | 43.5 |
| chr11 | Tmem106a  | Exon6  | N | 101450412 | 101450455 | 1 | 90.5 | 50.0 | 100.0 | 71.4 |
| chr12 | Cep128    | Exon6  | N | 92452005  | 92452197  | 1 | 79.0 | 63.0 | 82.9  | 54.3 |
| chr11 | Anxa6     | Exon6  | N | 54804893  | 54804946  | 1 | 78.6 | 59.7 | 80.7  | 52.3 |
| chr6  | Alox5     | Exon6  | N | 116365392 | 116365595 | 1 | 76.4 | 56.7 | 84.1  | 56.0 |

|       |          |        |   |           |           |    |      |      |      |      |
|-------|----------|--------|---|-----------|-----------|----|------|------|------|------|
| chr11 | Nprl3    | Exon6  | N | 32141798  | 32141935  | 1  | 77.9 | 28.8 | 64.2 | 37.0 |
| chr13 | Arsb     | Exon6  | N | 94709182  | 94709304  | 1  | 21.6 | 5.4  | 39.9 | 12.6 |
| chr1  | Stk36    | Exon6  | N | 74657346  | 74657439  | 1  | 33.9 | 11.5 | 37.1 | 10.0 |
| chr5  | Uvssa    | Exon6  | N | 33734705  | 33734833  | 1  | 68.6 | 51.4 | 69.0 | 42.2 |
| chr8  | Ccdc79   | Exon6  | N | 106996586 | 106996938 | 2  | 28.1 | 3.2  | 25.7 | 0.0  |
| chr7  | Tgfb1i1  | Exon6  | N | 135395591 | 135395764 | 1  | 44.6 | 24.9 | 45.2 | 19.6 |
| chr5  | Gm17660  | Exon6  | N | 104503724 | 104503792 | 1  | 27.1 | 3.2  | 31.8 | 7.7  |
| chr2  | Slc1a2   | Exon6  | N | 102596064 | 102596297 | 1  | 65.7 | 14.8 | 68.5 | 44.6 |
| chr17 | Brpf3    | Exon6  | N | 28955281  | 28955583  | 2  | 88.1 | 45.1 | 80.4 | 57.3 |
| chr4  | Gale     | Exon6  | N | 135523086 | 135523171 | 2  | 78.4 | 62.8 | 79.0 | 56.7 |
| chr5  | Fkbp6    | Exon6  | N | 135823747 | 135823836 | 1  | 83.0 | 65.0 | 89.3 | 67.7 |
| chr7  | Adamtsl3 | Exon6  | N | 89614074  | 89614200  | 1  | 42.6 | 23.0 | 55.2 | 33.7 |
| chr1  | Idh1     | Exon6  | N | 65217533  | 65217824  | 1  | 93.8 | 66.7 | 93.5 | 72.8 |
| chr10 | Specc1l  | Exon6  | N | 74721713  | 74721888  | 1  | 83.0 | 59.5 | 80.6 | 61.0 |
| chr7  | Akap13   | Exon6  | N | 82753371  | 82756446  | 15 | 71.9 | 43.6 | 61.3 | 42.0 |
| chr16 | Tango2   | Exon6  | N | 18316739  | 18316827  | 1  | 97.1 | 81.5 | 80.9 | 61.9 |
| chr8  | Lphn1    | Exon6  | N | 86455512  | 86455615  | 1  | 88.9 | 64.3 | 77.3 | 59.0 |
| chr7  | Mki67    | Exon6  | N | 142896226 | 142896478 | 1  | 90.8 | 70.8 | 86.0 | 68.0 |
| chr17 | Mlst8    | Exon6  | N | 24615056  | 24615107  | 1  | 44.9 | 20.0 | 39.2 | 21.2 |
| chr17 | Dnase1l2 | Exon6  | N | 24579585  | 24579744  | 2  | 95.0 | 75.0 | 77.5 | 60.5 |
| chr19 | Rtn3     | Exon6  | N | 7530790   | 7531950   | 6  | 60.1 | 42.1 | 71.8 | 54.9 |
| chr10 | Dazap1   | Exon6  | N | 79743674  | 79743756  | 1  | 79.4 | 52.3 | 83.7 | 66.9 |
| chr19 | Acta2    | Exon6  | N | 34326220  | 34326348  | 1  | 51.6 | 17.6 | 39.1 | 22.9 |
| chr3  | Tars2    | Exon6  | N | 95549956  | 95550093  | 1  | 81.7 | 60.5 | 79.6 | 64.0 |
| chr14 | Lgi3     | Exon6  | N | 70934488  | 70934652  | 1  | 83.8 | 58.1 | 72.7 | 57.1 |
| chr14 | Vdac2    | Exon6  | N | 22657613  | 22657840  | 1  | 78.4 | 58.1 | 66.1 | 50.7 |
| chr10 | Lrp1     | Exon65 | N | 127013496 | 127013693 | 1  | 29.1 | 9.4  | 26.9 | 6.8  |
| chr9  | Vps13c   | Exon67 | N | 67809401  | 67809542  | 1  | 75.4 | 24.6 | 64.3 | 37.8 |
| chr4  | Cyp2j5   | Exon7  | N | 96329803  | 96329965  | 1  | 63.9 | 9.5  | 72.5 | 3.3  |
| chr5  | Nsun5    | Exon7  | N | 135851145 | 135851355 | 2  | 67.5 | 8.9  | 65.4 | 7.5  |
| chr4  | Akr1a1   | Exon7  | N | 116318109 | 116318198 | 2  | 76.0 | 43.7 | 75.4 | 35.8 |
| chr11 | Hmmr     | Exon7  | N | 40527480  | 40527694  | 1  | 58.6 | 38.7 | 70.1 | 30.7 |
| chr11 | Itgae    | Exon7  | N | 72927084  | 72927235  | 1  | 57.0 | 27.1 | 55.6 | 16.8 |
| chr17 | Slc37a1  | Exon7  | N | 31459044  | 31459210  | 1  | 53.3 | 6.0  | 52.7 | 15.3 |
| chr7  | C2cd3    | Exon7  | N | 107548178 | 107548325 | 1  | 74.3 | 33.3 | 72.4 | 36.8 |
| chr9  | Poc1a    | Exon7  | N | 106207596 | 106207664 | 1  | 62.8 | 16.5 | 59.1 | 23.6 |
| chr16 | Abcc5    | Exon7  | N | 20364048  | 20364234  | 1  | 84.7 | 66.7 | 95.9 | 61.3 |
| chr3  | Setdb1   | Exon7  | N | 95132470  | 95132639  | 1  | 45.9 | 16.4 | 55.6 | 21.8 |
| chr4  | Rap1gap  | Exon7  | N | 137272000 | 137272078 | 1  | 41.5 | 10.6 | 54.8 | 21.4 |
| chr6  | Crbn     | Exon7  | N | 106744182 | 106744331 | 1  | 85.3 | 54.7 | 85.0 | 53.4 |
| chr18 | Hmgxb3   | Exon7  | N | 61306083  | 61306210  | 1  | 80.3 | 42.4 | 73.5 | 44.4 |
| chr8  | Rbm34    | Exon7  | N | 129489282 | 129489522 | 1  | 34.1 | 9.0  | 38.7 | 10.1 |
| chr7  | Chrdl2   | Exon7  | N | 107177162 | 107177356 | 1  | 50.0 | 29.2 | 63.8 | 35.6 |
| chr10 | Tmem194  | Exon7  | N | 127132425 | 127132598 | 1  | 69.6 | 45.0 | 69.8 | 43.1 |
| chr10 | Ccdc162  | Exon7  | N | 41273222  | 41273374  | 1  | 16.4 | 0.0  | 25.5 | 0.0  |
| chr18 | Wdr33    | Exon7  | N | 32037678  | 32037804  | 1  | 45.8 | 28.6 | 69.4 | 45.2 |
| chr8  | Zswim4   | Exon7  | N | 86749715  | 86750065  | 2  | 64.2 | 47.3 | 64.8 | 40.9 |
| chr11 | Eml6     | Exon7  | N | 29652436  | 29652550  | 1  | 79.0 | 55.3 | 80.7 | 57.5 |
| chr1  | Usf1     | Exon7  | N | 173347604 | 173347662 | 1  | 86.7 | 66.0 | 86.0 | 63.8 |



|       |               |       |   |           |           |   |       |      |      |      |
|-------|---------------|-------|---|-----------|-----------|---|-------|------|------|------|
| chr17 | Btnl5         | Exon7 | N | 34632864  | 34632960  | 1 | 73.9  | 20.5 | 69.9 | 48.1 |
| chr17 | Unkl          | Exon7 | N | 25347749  | 25347831  | 1 | 90.5  | 72.1 | 94.0 | 73.1 |
| chr10 | Ap3d1         | Exon7 | N | 80173434  | 80173577  | 1 | 81.4  | 62.5 | 77.6 | 56.8 |
| chr9  | Trim29        | Exon7 | N | 43140393  | 43140469  | 1 | 87.5  | 71.4 | 69.8 | 50.0 |
| chr9  | Plscr4        | Exon7 | N | 92384790  | 92384948  | 1 | 89.0  | 68.0 | 90.8 | 71.1 |
| chr6  | Phb2          | Exon7 | N | 124665972 | 124666052 | 1 | 75.5  | 41.1 | 64.9 | 45.8 |
| chr15 | Krt8          | Exon7 | N | 101831848 | 101832056 | 1 | 39.5  | 18.1 | 38.2 | 19.1 |
| chr3  | Gm21949       | Exon7 | N | 68421533  | 68421730  | 1 | 91.1  | 52.8 | 78.0 | 59.0 |
| chr17 | Mlst8         | Exon7 | N | 24615265  | 24615403  | 2 | 33.3  | 10.1 | 25.0 | 6.3  |
| chr5  | Exoc1         | Exon7 | N | 76972903  | 76973035  | 1 | 73.4  | 51.4 | 69.8 | 51.8 |
| chr2  | Prom2         | Exon7 | N | 127356841 | 127356933 | 1 | 81.1  | 63.6 | 89.3 | 71.9 |
| chr11 | E230016K23Rik | Exon7 | N | 83435142  | 83435307  | 1 | 78.0  | 60.2 | 76.6 | 59.4 |
| chr13 | Aoah          | Exon7 | N | 21002986  | 21003056  | 1 | 50.4  | 8.9  | 47.5 | 30.7 |
| chr2  | Slc1a2        | Exon7 | N | 102601172 | 102601366 | 1 | 90.7  | 71.4 | 94.8 | 79.3 |
| chr15 | Scn8a         | Exon7 | N | 100800635 | 100800698 | 1 | 46.8  | 31.5 | 35.9 | 20.4 |
| chr14 | Ncoa4         | Exon7 | N | 32989125  | 32990141  | 5 | 80.2  | 65.1 | 74.8 | 59.4 |
| chr19 | Cd6           | Exon7 | N | 10870816  | 10870878  | 1 | 90.0  | 68.8 | 97.8 | 82.6 |
| chr1  | Gtf3c3        | Exon8 | N | 54476227  | 54476398  | 1 | 78.3  | 14.3 | 83.8 | 11.8 |
| chr3  | Fhdc1         | Exon8 | N | 84268194  | 84268296  | 1 | 64.6  | 10.4 | 71.3 | 8.1  |
| chr6  | Zyx           | Exon8 | N | 42307312  | 42307432  | 1 | 65.1  | 20.8 | 80.1 | 18.8 |
| chr6  | Clcn1         | Exon8 | N | 42249237  | 42249321  | 1 | 77.4  | 20.0 | 65.7 | 5.7  |
| chr3  | Sema4a        | Exon8 | N | 88254433  | 88254549  | 1 | 91.0  | 32.9 | 89.2 | 35.0 |
| chr7  | Zfp541        | Exon8 | N | 16675146  | 16675209  | 1 | 76.2  | 60.0 | 87.5 | 46.2 |
| chr5  | Sdad1         | Exon8 | N | 92721679  | 92721755  | 1 | 60.2  | 14.7 | 48.0 | 13.0 |
| chr5  | Kdm2b         | Exon8 | N | 123332411 | 123332497 | 1 | 77.8  | 25.5 | 64.2 | 29.4 |
| chr11 | 1700023F06Rik | Exon8 | N | 103063060 | 103063072 | 1 | 38.9  | 10.2 | 42.0 | 7.5  |
| chr6  | Ubn2          | Exon8 | N | 38431804  | 38431922  | 1 | 58.7  | 31.5 | 64.8 | 31.9 |
| chr10 | Shprh         | Exon8 | N | 10884143  | 10884793  | 3 | 69.8  | 30.5 | 71.5 | 42.5 |
| chr11 | Med24         | Exon8 | N | 98571377  | 98571476  | 1 | 78.8  | 62.2 | 92.8 | 64.0 |
| chr19 | Fads3         | Exon8 | N | 10130481  | 10130577  | 1 | 87.0  | 28.4 | 58.4 | 32.2 |
| chr6  | Sfxn5         | Exon8 | N | 85237044  | 85237069  | 1 | 85.1  | 63.0 | 87.4 | 61.3 |
| chr10 | Mcm9          | Exon8 | N | 53335658  | 53335858  | 1 | 86.3  | 64.1 | 93.4 | 68.7 |
| chr10 | Sgk1          | Exon8 | N | 21716365  | 21716477  | 1 | 86.3  | 58.3 | 85.4 | 62.3 |
| chr15 | Sema5a        | Exon8 | N | 32492246  | 32492531  | 1 | 77.2  | 60.3 | 76.1 | 55.0 |
| chr6  | Dysf          | Exon8 | N | 84017448  | 84017510  | 1 | 60.0  | 34.8 | 56.5 | 36.1 |
| chr6  | Arhgap25      | Exon8 | N | 87442172  | 87442259  | 1 | 77.8  | 52.4 | 76.9 | 56.5 |
| chr11 | Llgl2         | Exon8 | N | 115708903 | 115708957 | 1 | 100.0 | 79.2 | 88.2 | 68.0 |
| chr9  | Npsr1         | Exon8 | N | 24117617  | 24117797  | 1 | 76.7  | 58.0 | 75.2 | 56.4 |
| chr10 | Mbd6          | Exon8 | N | 126723850 | 126724012 | 1 | 43.2  | 10.0 | 27.2 | 8.9  |
| chr16 | Dnaja3        | Exon8 | N | 4701169   | 4701284   | 1 | 92.6  | 63.0 | 80.3 | 64.2 |
| chr12 | Rad51b        | Exon8 | N | 80868058  | 80868161  | 1 | 50.0  | 22.6 | 39.5 | 23.9 |
| chr15 | Oc90          | Exon9 | N | 65723914  | 65724026  | 1 | 82.6  | 4.3  | 72.0 | 0.0  |
| chr19 | Fads3         | Exon9 | N | 10130707  | 10130786  | 1 | 93.8  | 28.6 | 92.4 | 22.0 |
| chr14 | Cpne6         | Exon9 | N | 56134056  | 56134115  | 1 | 76.5  | 36.0 | 70.8 | 9.1  |
| chr6  | Clcn1         | Exon9 | N | 42249499  | 42249600  | 1 | 84.7  | 27.6 | 82.8 | 30.1 |
| chr5  | Fbxl13        | Exon9 | N | 21049478  | 21049607  | 2 | 61.9  | 2.9  | 53.2 | 7.7  |
| chr11 | Pold2         | Exon9 | N | 5776716   | 5776992   | 2 | 70.1  | 21.1 | 64.9 | 23.4 |
| chr12 | Numb          | Exon9 | N | 85183168  | 85183308  | 2 | 72.8  | 40.8 | 82.9 | 44.2 |
| chr15 | Parp10        | Exon9 | N | 76073494  | 76073672  | 2 | 30.5  | 12.2 | 45.1 | 7.9  |

|       |               |         |   |           |           |    |      |      |      |      |
|-------|---------------|---------|---|-----------|-----------|----|------|------|------|------|
| chr19 | Plce1         | Exon9   | N | 38796302  | 38796410  | 1  | 53.4 | 8.0  | 47.4 | 11.8 |
| chr2  | Rapgef4       | Exon9   | N | 72017977  | 72018160  | 1  | 90.8 | 44.8 | 84.7 | 50.7 |
| chr7  | Ano1          | Exon9   | N | 151797519 | 151797720 | 1  | 85.9 | 55.3 | 81.4 | 48.1 |
| chr1  | Zranb3        | Exon9   | N | 129884574 | 129884723 | 1  | 90.6 | 56.7 | 92.5 | 61.4 |
| chr19 | Cnm1          | Exon9   | N | 43568200  | 43568301  | 1  | 37.0 | 18.6 | 37.9 | 8.1  |
| chr14 | Zswim8        | Exon9   | N | 21533105  | 21533790  | 4  | 87.3 | 37.0 | 77.4 | 50.0 |
| chr2  | Dnmt3b        | Exon9   | N | 153496039 | 153496183 | 1  | 79.5 | 54.4 | 80.1 | 54.3 |
| chr2  | Ppp1r16b      | Exon9   | N | 158582874 | 158583042 | 1  | 51.4 | 29.4 | 48.3 | 23.6 |
| chr9  | Gramd2        | Exon9   | N | 59563730  | 59563834  | 1  | 93.6 | 76.7 | 88.9 | 67.7 |
| chr13 | Rnf44         | Exon9   | N | 54785699  | 54785849  | 2  | 66.7 | 40.0 | 52.2 | 31.8 |
| chr4  | Srrm1         | Exon9   | N | 134893719 | 134893993 | 1  | 26.4 | 6.9  | 23.4 | 5.0  |
| chr7  | Kat8          | Exon9   | N | 135068623 | 135068777 | 2  | 64.1 | 48.4 | 56.5 | 39.0 |
| chr2  | Fam65c        | Exon9   | N | 167814754 | 167815305 | 3  | 93.8 | 56.1 | 71.4 | 54.2 |
| chr10 | Metap2        | Exon9   | N | 93349739  | 93349846  | 1  | 84.5 | 64.6 | 87.7 | 71.4 |
| chr3  | Tars2         | Exon9   | N | 95551965  | 95552063  | 1  | 80.6 | 52.0 | 64.7 | 48.4 |
| chr9  | Megf11        | Exon9   | N | 64508147  | 64508321  | 1  | 45.9 | 26.5 | 44.0 | 28.2 |
| chr16 | Lsg1          | Exon9   | N | 30581045  | 30581131  | 1  | 85.4 | 66.0 | 82.6 | 67.3 |
| chr13 | Shc3          | Exon9   | N | 51578251  | 51578314  | 1  | 47.5 | 7.6  | 33.0 | 17.8 |
| chr17 | Catsperd      | Exon9   | N | 56791218  | 56791313  | 1  | 44.2 | 23.3 | 27.1 | 12.0 |
| chr1  | Dst           | Exon90  | N | 34347204  | 34347392  | 1  | 62.1 | 30.8 | 66.3 | 25.2 |
| chr14 | Mtrf1         | Intron1 | N | 79797844  | 79799498  | 9  | 53.0 | 3.0  | 86.7 | 1.8  |
| chr9  | Casp1         | Intron1 | N | 5298724   | 5299279   | 3  | 85.9 | 2.7  | 80.8 | 1.3  |
| chr12 | Iah1          | Intron1 | N | 21322374  | 21323236  | 2  | 47.5 | 7.4  | 64.2 | 10.9 |
| chr8  | Ces2a         | Intron1 | N | 107258048 | 107258596 | 3  | 75.7 | 9.8  | 62.7 | 14.1 |
| chr2  | Mtch2         | Intron1 | N | 90687543  | 90689527  | 7  | 70.5 | 44.2 | 91.4 | 45.7 |
| chr3  | Gstm3         | Intron1 | N | 107767215 | 107769004 | 9  | 56.9 | 26.9 | 69.1 | 23.7 |
| chr16 | Ephb3         | Intron1 | N | 21205337  | 21212962  | 33 | 49.7 | 15.1 | 57.3 | 13.5 |
| chr19 | Mrpl21        | Intron1 | N | 3283172   | 3284759   | 7  | 49.7 | 34.1 | 52.3 | 9.7  |
| chr1  | Ctla4         | Intron1 | N | 60966124  | 60969266  | 16 | 87.5 | 61.5 | 83.5 | 42.2 |
| chr16 | Gm10791       | Intron1 | N | 84972998  | 84973792  | 4  | 56.3 | 32.4 | 68.5 | 27.3 |
| chr8  | Irf8          | Intron1 | N | 123260310 | 123263716 | 15 | 52.5 | 21.6 | 55.5 | 15.1 |
| chr17 | Prss32        | Intron1 | N | 23990894  | 23991345  | 2  | 63.4 | 23.3 | 61.0 | 21.0 |
| chr1  | Pigr          | Intron1 | N | 132723385 | 132730949 | 39 | 57.3 | 19.0 | 60.4 | 21.0 |
| chr9  | Ccdc13        | Intron1 | N | 121707358 | 121708143 | 4  | 80.9 | 45.5 | 39.1 | 0.0  |
| chr3  | 4932438A13Rik | Intron1 | N | 36762271  | 36763308  | 4  | 50.3 | 7.5  | 40.9 | 1.9  |
| chr7  | Nlrp6         | Intron1 | N | 148106986 | 148107539 | 2  | 49.5 | 0.9  | 39.4 | 0.6  |
| chr6  | Slc6a12       | Intron1 | N | 121297016 | 121297420 | 2  | 48.3 | 32.8 | 57.1 | 18.5 |
| chr19 | Zdhhc16       | Intron1 | N | 42008156  | 42009227  | 5  | 51.4 | 31.0 | 38.6 | 0.0  |
| chr17 | Ppp2r1a       | Intron1 | N | 21082548  | 21088306  | 25 | 72.9 | 53.5 | 90.0 | 52.7 |
| chr7  | Epn1          | Intron1 | N | 5032080   | 5033619   | 5  | 75.0 | 23.0 | 57.0 | 20.0 |
| chr18 | Slc12a2       | Intron1 | N | 58039199  | 58055935  | 79 | 70.7 | 31.5 | 70.6 | 34.1 |
| chr5  | Ii6           | Intron1 | N | 30339751  | 30339915  | 1  | 41.4 | 1.7  | 43.7 | 8.0  |
| chr11 | Cox11         | Intron1 | N | 90499867  | 90501690  | 7  | 54.8 | 36.4 | 91.8 | 56.3 |
| chr2  | Nkain4        | Intron1 | N | 180669735 | 180671855 | 12 | 79.4 | 39.3 | 74.8 | 39.7 |
| chr11 | Uqcr10        | Intron1 | N | 4602224   | 4604159   | 8  | 37.0 | 4.3  | 53.9 | 19.2 |
| chr2  | Ptpmt1        | Intron1 | N | 90751477  | 90754140  | 13 | 80.0 | 44.4 | 75.3 | 41.4 |
| chr17 | Rgmb          | Intron1 | N | 15944766  | 15957633  | 63 | 66.7 | 36.3 | 72.6 | 38.8 |
| chr4  | Gm13177       | Intron1 | N | 144203778 | 144207726 | 20 | 83.5 | 43.7 | 73.0 | 40.1 |
| chr9  | Ttc21a        | Intron1 | N | 119846869 | 119848284 | 6  | 62.5 | 38.8 | 74.8 | 42.1 |

|       |               |         |   |           |           |    |      |      |      |      |
|-------|---------------|---------|---|-----------|-----------|----|------|------|------|------|
| chr5  | Nudt9         | Intron1 | N | 104476166 | 104479596 | 15 | 63.1 | 46.6 | 94.1 | 61.8 |
| chr19 | Pdzd7         | Intron1 | N | 45102465  | 45102868  | 2  | 57.5 | 36.8 | 57.7 | 25.3 |
| chr16 | Col8a1        | Intron1 | N | 57628931  | 57632423  | 15 | 71.2 | 48.7 | 79.4 | 47.1 |
| chr11 | 4930502E09Rik | Intron1 | N | 84642915  | 84643403  | 2  | 91.6 | 59.7 | 83.7 | 52.6 |
| chr5  | Hadha         | Intron1 | N | 30446501  | 30446584  | 1  | 73.5 | 50.0 | 63.4 | 32.6 |
| chr3  | Nhlrc3        | Intron1 | N | 53256572  | 53257463  | 4  | 83.7 | 38.7 | 58.8 | 28.3 |
| chr3  | Adh1          | Intron1 | N | 137940701 | 137942694 | 10 | 48.8 | 33.6 | 78.2 | 47.8 |
| chr19 | Slc35g1       | Intron1 | N | 38470792  | 38474923  | 18 | 57.8 | 30.5 | 46.3 | 16.4 |
| chr10 | Mettl7b       | Intron1 | N | 128396012 | 128397496 | 8  | 69.5 | 13.9 | 55.6 | 26.3 |
| chr9  | Ubl7          | Intron1 | N | 57758867  | 57760444  | 7  | 81.4 | 64.6 | 68.2 | 39.3 |
| chr19 | Nhlrc2        | Intron1 | N | 56623351  | 56626248  | 14 | 57.5 | 26.8 | 42.0 | 13.6 |
| chr11 | Mgat4b        | Intron1 | N | 50039242  | 50044181  | 22 | 47.0 | 20.0 | 40.9 | 12.8 |
| chr12 | Gpx2          | Intron1 | N | 77893988  | 77896140  | 11 | 23.2 | 0.8  | 28.6 | 0.8  |
| chr8  | B930018H19Rik | Intron1 | N | 35653640  | 35654811  | 6  | 60.9 | 34.4 | 66.4 | 38.7 |
| chr5  | Vsig10        | Intron1 | N | 117769513 | 117773508 | 17 | 29.8 | 8.2  | 59.7 | 32.5 |
| chr7  | Pnpla2        | Intron1 | N | 148641373 | 148643171 | 7  | 77.5 | 27.8 | 55.7 | 28.7 |
| chr2  | Myh7b         | Intron1 | N | 155436998 | 155437322 | 2  | 82.5 | 56.6 | 80.5 | 53.7 |
| chr16 | Gm933         | Intron1 | N | 32805131  | 32806285  | 6  | 58.4 | 26.1 | 67.4 | 40.9 |
| chr3  | Gstm1         | Intron1 | N | 107815697 | 107817670 | 10 | 61.8 | 25.6 | 73.3 | 46.9 |
| chr11 | Rnft1         | Intron1 | N | 86298302  | 86299562  | 4  | 48.8 | 28.5 | 34.4 | 8.3  |
| chr7  | Ebf3          | Intron1 | N | 144388086 | 144390174 | 10 | 88.2 | 62.6 | 73.0 | 47.2 |
| chr7  | Kcnn4         | Intron1 | N | 25155615  | 25159690  | 20 | 32.5 | 11.7 | 34.3 | 8.5  |
| chr17 | Cyp4f40       | Intron1 | N | 32796629  | 32799062  | 12 | 68.7 | 40.2 | 64.2 | 38.5 |
| chr10 | Adat3         | Intron1 | N | 80065695  | 80069058  | 14 | 49.8 | 15.1 | 57.3 | 31.7 |
| chr15 | Col2a1        | Intron1 | N | 97806618  | 97807072  | 2  | 35.4 | 19.1 | 64.1 | 38.7 |
| chr4  | Hook1         | Intron1 | N | 95634248  | 95641076  | 31 | 89.5 | 68.2 | 85.5 | 60.2 |
| chr7  | Pglyrp1       | Intron1 | N | 19470323  | 19474626  | 22 | 66.6 | 38.4 | 65.9 | 40.7 |
| chr8  | Nqo1          | Intron1 | N | 109913025 | 109914944 | 10 | 58.5 | 36.2 | 71.0 | 46.2 |
| chr7  | Dmbt1         | Intron1 | N | 138175660 | 138178194 | 13 | 59.0 | 17.4 | 44.3 | 19.8 |
| chr2  | Golga2        | Intron1 | N | 32143917  | 32147612  | 16 | 74.5 | 56.4 | 84.4 | 59.9 |
| chr3  | Rbm15         | Intron1 | N | 107129223 | 107133132 | 17 | 73.3 | 30.0 | 55.0 | 30.6 |
| chr7  | Psenen        | Intron1 | N | 31347154  | 31347342  | 1  | 54.3 | 39.3 | 60.0 | 35.7 |
| chr17 | Wash          | Intron1 | N | 66460990  | 66463202  | 9  | 75.9 | 57.4 | 90.6 | 66.3 |
| chr2  | Zc3h15        | Intron1 | N | 83484885  | 83493514  | 38 | 33.9 | 11.8 | 46.0 | 21.8 |
| chr5  | Cldn15        | Intron1 | N | 137444194 | 137448189 | 20 | 82.7 | 46.0 | 77.7 | 53.5 |
| chr17 | Tmem8         | Intron1 | N | 26250513  | 26253703  | 13 | 28.8 | 3.3  | 34.7 | 10.5 |
| chr13 | Cenpk         | Intron1 | N | 105019083 | 105020808 | 6  | 31.4 | 8.3  | 31.8 | 7.7  |
| chr12 | Ddx1          | Intron1 | N | 13226435  | 13227152  | 4  | 29.2 | 0.0  | 71.7 | 47.6 |
| chr1  | Ccl20         | Intron1 | N | 83113478  | 83114373  | 5  | 53.0 | 22.7 | 27.1 | 3.0  |
| chr11 | Hoxb9         | Intron1 | N | 96133373  | 96135937  | 7  | 53.5 | 35.1 | 52.5 | 28.4 |
| chr18 | 1700065O20Rik | Intron1 | N | 49963182  | 49965434  | 10 | 72.1 | 55.0 | 79.0 | 55.0 |
| chr11 | Slc25a35      | Intron1 | N | 68782540  | 68784225  | 7  | 93.1 | 56.5 | 90.6 | 66.7 |
| chr3  | Hmgcs2        | Intron1 | N | 98084511  | 98094809  | 50 | 73.1 | 25.0 | 67.8 | 43.8 |
| chr3  | Alpk1         | Intron1 | N | 127374050 | 127375277 | 6  | 74.3 | 57.1 | 72.4 | 48.6 |
| chr2  | Dpp4          | Intron1 | N | 62170777  | 62172312  | 9  | 91.3 | 73.6 | 91.6 | 68.0 |
| chr2  | Agpat2        | Intron1 | N | 26449283  | 26450299  | 5  | 37.8 | 14.8 | 36.6 | 13.1 |
| chr11 | LOC666331     | Intron1 | N | 101472224 | 101472405 | 1  | 57.7 | 25.0 | 47.1 | 23.5 |
| chr4  | Stmn1         | Intron1 | N | 134024345 | 134026017 | 3  | 56.1 | 14.6 | 40.3 | 17.0 |
| chr11 | Krt31         | Intron1 | N | 99908375  | 99908982  | 3  | 46.9 | 25.0 | 40.3 | 17.1 |

|       |               |         |   |           |           |     |      |      |      |      |
|-------|---------------|---------|---|-----------|-----------|-----|------|------|------|------|
| chr11 | Hoxb7         | Intron1 | N | 96148442  | 96150690  | 8   | 56.6 | 24.1 | 52.6 | 29.4 |
| chr6  | Tpi1          | Intron1 | N | 124761406 | 124761534 | 2   | 65.3 | 39.8 | 64.7 | 41.6 |
| chr6  | Herc6         | Intron1 | N | 57531227  | 57533166  | 9   | 45.3 | 26.8 | 50.9 | 27.9 |
| chr11 | Engase        | Intron1 | N | 118338419 | 118340196 | 6   | 46.3 | 23.3 | 41.9 | 18.9 |
| chr7  | Slc1a5        | Intron1 | N | 17367825  | 17371024  | 15  | 17.2 | 0.3  | 24.5 | 1.6  |
| chr4  | AU040320      | Intron1 | N | 126430907 | 126434142 | 13  | 51.9 | 34.8 | 46.0 | 23.2 |
| chr5  | Epgn          | Intron1 | N | 91456592  | 91457325  | 3   | 27.9 | 10.0 | 26.1 | 3.3  |
| chr15 | 0610007N19Rik | Intron1 | N | 32171525  | 32174136  | 13  | 34.9 | 9.5  | 38.8 | 16.1 |
| chr6  | Tfpi2         | Intron1 | N | 3913448   | 3913805   | 2   | 24.5 | 2.4  | 24.7 | 2.1  |
| chr12 | Degs2         | Intron1 | N | 109927298 | 109930103 | 15  | 30.3 | 10.6 | 32.6 | 10.0 |
| chr14 | Styx          | Intron1 | N | 45971205  | 45974620  | 15  | 81.9 | 56.8 | 77.6 | 55.1 |
| chr15 | Klhl38        | Intron1 | N | 58146672  | 58147781  | 6   | 88.7 | 59.4 | 67.5 | 45.0 |
| chr10 | Sumo3         | Intron1 | N | 77069087  | 77072556  | 13  | 81.4 | 62.4 | 81.8 | 59.3 |
| chr11 | Abca9         | Intron1 | N | 109963378 | 109963824 | 2   | 83.2 | 53.6 | 90.3 | 67.8 |
| chr11 | Sp2           | Intron1 | N | 96815885  | 96817088  | 6   | 64.3 | 43.1 | 69.3 | 46.9 |
| chr15 | E430025E21Rik | Intron1 | N | 59163915  | 59165172  | 6   | 62.1 | 17.4 | 57.3 | 35.0 |
| chr19 | Gm10814       | Intron1 | N | 6012685   | 6014228   | 10  | 92.4 | 71.1 | 74.8 | 52.7 |
| chr2  | Ada           | Intron1 | N | 163552785 | 163553279 | 3   | 47.2 | 2.0  | 43.7 | 21.6 |
| chr14 | Rnase1        | Intron1 | N | 51765595  | 51766390  | 4   | 73.1 | 25.7 | 88.1 | 66.4 |
| chr2  | Cbln4         | Intron1 | N | 171863068 | 171864473 | 7   | 93.5 | 71.0 | 59.8 | 38.2 |
| chr4  | Nbl1          | Intron1 | N | 138639518 | 138641155 | 8   | 75.3 | 49.7 | 78.9 | 57.4 |
| chr3  | 4931419H13Rik | Intron1 | N | 54859359  | 54862196  | 12  | 77.8 | 59.1 | 57.3 | 35.9 |
| chr10 | Ano4          | Intron1 | N | 88412528  | 88414934  | 12  | 46.4 | 25.6 | 43.5 | 22.2 |
| chr2  | Hnf4a         | Intron1 | N | 163373156 | 163377312 | 21  | 47.1 | 23.8 | 42.5 | 21.3 |
| chr4  | Aldh1b1       | Intron1 | N | 45812042  | 45815326  | 15  | 33.8 | 6.7  | 32.3 | 11.5 |
| chr15 | Gm20556       | Intron1 | N | 84545570  | 84549126  | 18  | 91.8 | 67.6 | 73.2 | 52.3 |
| chr2  | Slmo2         | Intron1 | N | 174291438 | 174292226 | 4   | 86.5 | 57.3 | 73.3 | 52.5 |
| chr7  | Orai3         | Intron1 | N | 134913731 | 134917070 | 16  | 50.5 | 29.7 | 51.1 | 30.4 |
| chr10 | 1700040L02Rik | Intron1 | N | 67894072  | 67899027  | 25  | 69.0 | 51.9 | 67.7 | 46.9 |
| chr1  | Aox3          | Intron1 | N | 58170157  | 58171714  | 8   | 75.7 | 45.7 | 74.6 | 54.0 |
| chr8  | Zfp617        | Intron1 | N | 74446872  | 74452100  | 22  | 98.7 | 75.8 | 90.8 | 70.3 |
| chr11 | Slc16a13      | Intron1 | N | 70031424  | 70032094  | 3   | 35.8 | 1.2  | 26.4 | 6.0  |
| chr3  | P2ry1         | Intron1 | N | 60808522  | 60810820  | 12  | 73.9 | 17.7 | 67.4 | 47.1 |
| chr2  | Sord          | Intron1 | N | 122060695 | 122072217 | 56  | 64.9 | 43.1 | 61.6 | 41.3 |
| chr7  | Zg16          | Intron1 | N | 134194114 | 134195140 | 5   | 78.0 | 56.5 | 77.9 | 57.7 |
| chr2  | Itga6         | Intron1 | N | 71625378  | 71654686  | 142 | 60.5 | 45.4 | 61.2 | 41.0 |
| chr6  | Zfp282        | Intron1 | N | 47827836  | 47829998  | 7   | 34.0 | 5.7  | 34.5 | 14.4 |
| chr2  | Acss2         | Intron1 | N | 155344021 | 155347716 | 16  | 62.1 | 44.6 | 48.4 | 28.4 |
| chr2  | Ahcy          | Intron1 | N | 154886317 | 154887884 | 8   | 96.1 | 76.6 | 82.4 | 62.5 |
| chr6  | Clcn1         | Intron1 | N | 42236946  | 42240071  | 16  | 80.8 | 63.0 | 85.1 | 65.2 |
| chr7  | Taldo1        | Intron1 | N | 148578218 | 148581947 | 17  | 58.2 | 32.1 | 61.4 | 41.5 |
| chr17 | Tbl3          | Intron1 | N | 24837731  | 24837820  | 2   | 76.8 | 55.8 | 81.4 | 61.6 |
| chr9  | Fbxl22        | Intron1 | N | 66359826  | 66362025  | 7   | 47.6 | 14.3 | 39.1 | 19.4 |
| chr6  | Akr1b7        | Intron1 | N | 34362476  | 34365319  | 14  | 88.2 | 64.6 | 87.3 | 67.6 |
| chr9  | Gm684         | Intron1 | N | 51079031  | 51080432  | 7   | 69.0 | 28.9 | 45.1 | 25.5 |
| chr1  | Ivns1abp      | Intron1 | N | 153191886 | 153196505 | 17  | 43.4 | 3.8  | 24.9 | 5.4  |
| chr11 | B3gnt1        | Intron1 | N | 121479167 | 121480948 | 9   | 81.9 | 65.9 | 86.8 | 67.4 |
| chr5  | Ddx55         | Intron1 | N | 125003049 | 125004551 | 6   | 80.4 | 62.9 | 77.0 | 57.7 |
| chr13 | Akr1c18       | Intron1 | N | 4132083   | 4134448   | 11  | 84.7 | 35.0 | 74.2 | 55.0 |

|       |               |         |   |           |           |     |      |      |      |      |
|-------|---------------|---------|---|-----------|-----------|-----|------|------|------|------|
| chr14 | Mat1a         | Intron1 | N | 41918550  | 41918635  | 1   | 69.2 | 37.8 | 64.0 | 44.8 |
| chr15 | Eppk1         | Intron1 | N | 75943156  | 75949538  | 31  | 62.8 | 44.9 | 60.9 | 41.7 |
| chr7  | Kctd14        | Intron1 | N | 104600057 | 104601821 | 9   | 59.3 | 40.7 | 50.5 | 31.4 |
| chr11 | 4932414J04Rik | Intron1 | N | 21395128  | 21397043  | 10  | 87.8 | 59.6 | 74.9 | 55.9 |
| chr7  | Ifitm5        | Intron1 | N | 148135348 | 148135916 | 3   | 64.0 | 47.2 | 69.7 | 50.7 |
| chr6  | Tmem43        | Intron1 | N | 91423893  | 91427238  | 15  | 95.6 | 39.6 | 73.6 | 54.5 |
| chr3  | Chmp4c        | Intron1 | N | 10367222  | 10385551  | 91  | 52.7 | 35.6 | 58.6 | 39.7 |
| chr6  | Mgst1         | Intron1 | N | 138089128 | 138096179 | 36  | 57.7 | 29.5 | 52.9 | 33.9 |
| chr3  | Ctss          | Intron1 | N | 95330848  | 95333355  | 13  | 84.6 | 64.3 | 81.2 | 62.3 |
| chr17 | Ly6g6c        | Intron1 | N | 35204390  | 35205811  | 7   | 49.4 | 33.8 | 54.4 | 35.7 |
| chr10 | Rdh1          | Intron1 | N | 127197307 | 127200020 | 14  | 90.1 | 66.9 | 89.9 | 71.3 |
| chr6  | Fam136a       | Intron1 | N | 86315814  | 86316603  | 1   | 46.0 | 27.1 | 37.8 | 19.4 |
| chr1  | Neu2          | Intron1 | N | 89470702  | 89476008  | 27  | 59.7 | 42.4 | 51.4 | 32.9 |
| chr7  | Picalm        | Intron1 | N | 97279213  | 97308957  | 138 | 47.6 | 29.7 | 51.9 | 33.5 |
| chr1  | Pikfyve       | Intron1 | N | 65233408  | 65236892  | 15  | 33.6 | 0.0  | 38.1 | 19.8 |
| chr7  | Mesdc2        | Intron1 | N | 91040986  | 91044039  | 13  | 76.8 | 55.5 | 63.1 | 44.9 |
| chr7  | E430018J23Rik | Intron1 | N | 134536030 | 134536514 | 2   | 72.7 | 55.6 | 66.7 | 48.5 |
| chr1  | Acsl3         | Intron1 | N | 78654679  | 78659715  | 23  | 31.3 | 15.6 | 35.4 | 17.4 |
| chr7  | Tmem86a       | Intron1 | N | 54306172  | 54308219  | 8   | 43.9 | 23.9 | 36.1 | 18.2 |
| chr18 | Gm9926        | Intron1 | N | 66664117  | 66664963  | 4   | 87.6 | 63.1 | 81.1 | 63.2 |
| chr11 | Pgam2         | Intron1 | N | 5701843   | 5703001   | 6   | 54.4 | 31.1 | 40.1 | 22.2 |
| chr4  | Hmgcl         | Intron1 | N | 135502456 | 135506464 | 16  | 70.9 | 52.6 | 66.9 | 49.1 |
| chr11 | Trim11        | Intron1 | N | 58792147  | 58794742  | 10  | 61.7 | 45.8 | 58.9 | 41.2 |
| chr10 | Amdhd1        | Intron1 | N | 92987248  | 92988590  | 7   | 88.7 | 66.0 | 85.0 | 67.3 |
| chr13 | Glrx          | Intron1 | N | 75977624  | 75984617  | 35  | 50.8 | 30.4 | 43.2 | 25.5 |
| chr5  | Atp6v0a2      | Intron1 | N | 125079872 | 125083459 | 15  | 72.3 | 45.2 | 57.1 | 39.6 |
| chr16 | Vgll3         | Intron1 | N | 65816004  | 65828138  | 57  | 77.6 | 56.1 | 70.2 | 52.7 |
| chr4  | Rnf220        | Intron1 | N | 116944981 | 116945657 | 3   | 27.5 | 2.2  | 26.4 | 8.9  |
| chr2  | Lrrc8a        | Intron1 | N | 30093326  | 30096088  | 10  | 47.1 | 24.3 | 40.2 | 22.9 |
| chr7  | Fam83e        | Intron1 | N | 52978025  | 52978810  | 4   | 28.8 | 4.9  | 21.5 | 4.2  |
| chr3  | Mgst2         | Intron1 | N | 51465229  | 51468432  | 16  | 44.2 | 24.6 | 34.0 | 16.8 |
| chr10 | Lrig3         | Intron1 | N | 125403768 | 125409176 | 24  | 56.2 | 25.5 | 35.2 | 18.0 |
| chr3  | Polr3gl       | Intron1 | N | 96382512  | 96383720  | 6   | 92.9 | 63.7 | 76.8 | 59.7 |
| chr4  | Hdhd3         | Intron1 | N | 62161128  | 62163191  | 9   | 71.0 | 49.3 | 50.3 | 33.2 |
| chr2  | Ndor1         | Intron1 | N | 25101670  | 25101851  | 2   | 66.0 | 25.0 | 73.5 | 56.6 |
| chr6  | Aqp1          | Intron1 | N | 55286869  | 55295399  | 43  | 63.6 | 43.0 | 59.1 | 42.2 |
| chr2  | Pdss1         | Intron1 | N | 22751283  | 22756800  | 25  | 94.0 | 76.5 | 92.2 | 75.4 |
| chr4  | Gm438         | Intron1 | N | 144368079 | 144369618 | 8   | 75.8 | 60.6 | 78.8 | 62.1 |
| chr13 | 2310005E17Rik | Intron1 | N | 99194872  | 99199004  | 21  | 50.3 | 31.9 | 63.8 | 47.2 |
| chr3  | Gm15441       | Intron1 | N | 96359984  | 96361208  | 6   | 31.7 | 0.0  | 45.7 | 29.1 |
| chr5  | Brca2         | Intron1 | N | 151325472 | 151325749 | 1   | 30.0 | 10.4 | 32.9 | 16.3 |
| chr11 | 2810442I21Rik | Intron1 | N | 16839651  | 16850884  | 56  | 84.8 | 65.2 | 84.8 | 68.2 |
| chr10 | Cand1         | Intron1 | N | 118640262 | 118643771 | 18  | 72.8 | 47.4 | 62.7 | 46.3 |
| chr3  | Dennd2d       | Intron1 | N | 106285632 | 106289790 | 19  | 23.2 | 7.5  | 21.3 | 5.0  |
| chr13 | Akr1c13       | Intron1 | N | 4190557   | 4193279   | 13  | 51.0 | 10.4 | 22.1 | 5.8  |
| chr2  | Emc7          | Intron1 | N | 112295458 | 112299616 | 17  | 96.8 | 26.1 | 80.8 | 64.5 |
| chr10 | Thop1         | Intron1 | N | 80533024  | 80535897  | 13  | 76.9 | 46.6 | 78.2 | 61.9 |
| chr1  | Atp1a2        | Intron1 | N | 174204861 | 174206048 | 6   | 84.0 | 64.0 | 89.4 | 73.2 |
| chr8  | Amfr          | Intron1 | N | 96497215  | 96497958  | 4   | 90.7 | 62.1 | 86.1 | 70.0 |

|       |               |          |   |           |           |    |      |      |      |      |
|-------|---------------|----------|---|-----------|-----------|----|------|------|------|------|
| chr10 | Dna2          | Intron1  | N | 62409918  | 62411930  | 8  | 80.9 | 48.6 | 75.4 | 59.3 |
| chr6  | Suclg1        | Intron1  | N | 73198748  | 73206164  | 34 | 45.6 | 22.3 | 41.7 | 25.7 |
| chr2  | Hoxd10        | Intron1  | N | 74530782  | 74532147  | 5  | 53.0 | 24.1 | 56.6 | 40.7 |
| chr10 | Socs2         | Intron1  | N | 94875745  | 94877464  | 5  | 29.3 | 4.2  | 34.5 | 18.6 |
| chr7  | Cd81          | Intron1  | N | 150238972 | 150248397 | 44 | 71.5 | 45.6 | 65.9 | 50.0 |
| chr5  | 4930519H02Rik | Intron1  | N | 15369871  | 15373088  | 15 | 48.3 | 30.1 | 63.6 | 47.8 |
| chr7  | Fan1          | Intron1  | N | 71491782  | 71493733  | 10 | 93.2 | 69.3 | 84.7 | 68.8 |
| chr9  | Taf1d         | Intron1  | N | 15110728  | 15112171  | 5  | 57.3 | 37.5 | 60.2 | 44.3 |
| chr5  | Pgm1          | Intron1  | N | 64484328  | 64488217  | 17 | 62.5 | 41.9 | 58.5 | 42.6 |
| chr19 | E030003E18Rik | Intron1  | N | 20567312  | 20567884  | 3  | 77.3 | 58.4 | 80.3 | 64.6 |
| chr15 | Bin2          | Intron1  | N | 100471996 | 100475243 | 16 | 75.8 | 56.3 | 80.4 | 64.8 |
| chr10 | Oaz1          | Intron1  | N | 80289651  | 80290981  | 4  | 31.9 | 5.6  | 30.5 | 14.8 |
| chr3  | Rtca          | Intron1  | N | 116192257 | 116195900 | 18 | 81.5 | 64.1 | 82.1 | 66.6 |
| chr14 | 1700092C10Rik | Intron1  | N | 69783075  | 69783820  | 4  | 68.6 | 48.3 | 70.8 | 55.3 |
| chr3  | Impa1         | Intron1  | N | 10315302  | 10316102  | 4  | 42.4 | 26.4 | 36.9 | 21.6 |
| chr6  | Gm19434       | Intron1  | N | 135138614 | 135138852 | 1  | 43.8 | 26.7 | 55.2 | 40.0 |
| chr1  | Elf3          | Intron1  | N | 137150958 | 137151501 | 3  | 27.0 | 1.8  | 16.8 | 1.6  |
| chr10 | Syne1         | Intron1  | N | 5152069   | 5153368   | 5  | 38.6 | 2.9  | 20.7 | 5.6  |
| chr14 | Pnp2          | Intron1  | N | 51575904  | 51579189  | 16 | 63.9 | 48.0 | 69.3 | 54.2 |
| chr4  | Zdhhc18       | Intron1  | N | 133164689 | 133166284 | 8  | 50.1 | 34.7 | 49.3 | 34.2 |
| chr3  | Clca4         | Intron10 | N | 144507590 | 144509325 | 9  | 80.6 | 25.2 | 81.6 | 20.9 |
| chr4  | Cachd1        | Intron10 | N | 100638940 | 100639550 | 3  | 65.5 | 19.6 | 66.3 | 11.4 |
| chr14 | Tmtc4         | Intron10 | N | 123342580 | 123343895 | 7  | 91.7 | 63.8 | 67.1 | 18.0 |
| chr12 | Pum2          | Intron10 | N | 8730986   | 8735439   | 20 | 95.6 | 56.3 | 75.9 | 27.6 |
| chr10 | D10Wsu52e     | Intron10 | N | 85416250  | 85418463  | 11 | 70.0 | 29.9 | 77.3 | 40.0 |
| chr4  | Acap3         | Intron10 | N | 155274520 | 155275776 | 6  | 87.3 | 53.6 | 74.9 | 39.1 |
| chr15 | BC024139      | Intron10 | N | 75955212  | 75955491  | 1  | 45.5 | 7.7  | 42.4 | 7.5  |
| chr18 | Ss18          | Intron10 | N | 14837973  | 14841175  | 11 | 78.6 | 38.3 | 89.3 | 55.9 |
| chr9  | Tinag         | Intron10 | N | 76880297  | 76893155  | 59 | 83.2 | 65.1 | 80.7 | 52.6 |
| chr1  | Hspd1         | Intron10 | N | 55141630  | 55143609  | 10 | 43.4 | 20.5 | 41.5 | 14.0 |
| chr5  | Dcun1d4       | Intron10 | N | 73946703  | 73948492  | 9  | 81.1 | 57.0 | 86.1 | 58.6 |
| chr19 | Zp1           | Intron10 | N | 10993556  | 10993869  | 2  | 80.7 | 57.5 | 70.2 | 43.0 |
| chr7  | Itgad         | Intron10 | N | 135329565 | 135329744 | 1  | 44.7 | 26.6 | 44.8 | 18.9 |
| chr7  | Cblc          | Intron10 | N | 20378015  | 20378157  | 1  | 87.1 | 69.4 | 89.6 | 64.0 |
| chr2  | Abcb11        | Intron10 | N | 69112217  | 69115827  | 16 | 82.1 | 50.5 | 74.8 | 49.1 |
| chr1  | Tmbim1        | Intron10 | N | 74340577  | 74341771  | 6  | 68.9 | 33.9 | 69.2 | 43.9 |
| chr18 | Bin1          | Intron10 | N | 32581615  | 32584473  | 14 | 90.8 | 34.4 | 78.7 | 53.7 |
| chr10 | Creb3l3       | Intron10 | N | 80555403  | 80555551  | 2  | 37.7 | 12.1 | 36.9 | 12.2 |
| chr17 | Slc22a1       | Intron10 | N | 12860197  | 12868111  | 39 | 61.2 | 38.1 | 70.9 | 46.8 |
| chr9  | Prtg          | Intron10 | N | 72704888  | 72706567  | 8  | 97.5 | 63.1 | 91.9 | 68.2 |
| chr5  | Tapt1         | Intron10 | N | 44584562  | 44585486  | 5  | 89.1 | 73.6 | 73.3 | 49.6 |
| chr9  | Amica1        | Intron10 | N | 44912357  | 44915461  | 17 | 84.6 | 40.0 | 84.1 | 61.3 |
| chr1  | Vps4b         | Intron10 | N | 108688367 | 108692997 | 21 | 77.3 | 36.3 | 63.9 | 41.4 |
| chr2  | Osbp12        | Intron10 | N | 179888028 | 179889971 | 9  | 87.4 | 69.6 | 73.5 | 51.9 |
| chr1  | Plcd4         | Intron10 | N | 74607068  | 74608628  | 9  | 92.6 | 73.8 | 85.2 | 64.3 |
| chr2  | F2            | Intron10 | N | 91473454  | 91475055  | 8  | 61.0 | 43.7 | 45.9 | 25.1 |
| chr11 | Osbp2         | Intron10 | N | 3617218   | 3617796   | 3  | 52.8 | 34.5 | 62.9 | 42.9 |
| chr13 | Aoah          | Intron10 | N | 21006870  | 21008928  | 10 | 90.4 | 61.5 | 79.7 | 60.6 |
| chr11 | Luc7l3        | Intron10 | N | 94171006  | 94183003  | 57 | 66.0 | 45.7 | 58.2 | 39.5 |

|       |           |          |   |           |           |    |       |      |      |      |
|-------|-----------|----------|---|-----------|-----------|----|-------|------|------|------|
| chr7  | Relb      | Intron10 | N | 20213320  | 20214539  | 2  | 42.6  | 21.7 | 38.7 | 20.1 |
| chr10 | Ank3      | Intron10 | N | 69333948  | 69337537  | 17 | 55.4  | 38.1 | 58.6 | 40.3 |
| chr8  | Smarca5   | Intron10 | N | 83235705  | 83237832  | 11 | 94.3  | 77.5 | 92.4 | 74.3 |
| chr2  | Lnp       | Intron10 | N | 74407186  | 74408991  | 8  | 63.0  | 32.1 | 56.6 | 38.6 |
| chr19 | Cep78     | Intron10 | N | 16050853  | 16053270  | 12 | 93.1  | 77.1 | 89.4 | 71.9 |
| chr15 | Oxr1      | Intron10 | N | 41655042  | 41657435  | 11 | 95.7  | 75.2 | 89.7 | 72.3 |
| chr5  | Fbxl13    | Intron10 | N | 21049608  | 21057910  | 42 | 78.1  | 60.6 | 77.6 | 61.4 |
| chr9  | Tex9      | Intron10 | N | 72335883  | 72339545  | 18 | 72.4  | 33.2 | 55.7 | 39.7 |
| chr4  | lkbkap    | Intron10 | N | 56782088  | 56783852  | 9  | 87.8  | 65.4 | 83.3 | 68.0 |
| chr1  | Lgr6      | Intron10 | N | 136899849 | 136900034 | 1  | 50.0  | 17.4 | 52.0 | 36.7 |
| chr5  | Trafd1    | Intron11 | N | 121834114 | 121835533 | 4  | 78.7  | 38.9 | 73.0 | 2.5  |
| chr1  | Atg16l1   | Intron11 | N | 89675603  | 89676699  | 5  | 61.1  | 15.3 | 45.0 | 1.5  |
| chr11 | Eif4enif1 | Intron11 | N | 3134649   | 3135583   | 5  | 79.4  | 33.0 | 73.3 | 35.3 |
| chr8  | Ces1f     | Intron11 | N | 95795864  | 95798011  | 11 | 80.7  | 43.6 | 78.3 | 43.9 |
| chr9  | Arih1     | Intron11 | N | 59274514  | 59284577  | 46 | 90.1  | 74.3 | 82.7 | 50.4 |
| chr4  | Dnaic1    | Intron11 | N | 41561381  | 41561682  | 2  | 78.3  | 50.0 | 58.5 | 27.7 |
| chr11 | Sec14l2   | Intron11 | N | 4016760   | 4018627   | 7  | 65.4  | 44.7 | 55.0 | 25.4 |
| chr8  | Tmem161a  | Intron11 | N | 72705426  | 72705781  | 2  | 63.0  | 26.2 | 59.7 | 30.4 |
| chr5  | Dcun1d4   | Intron11 | N | 73948596  | 73948870  | 1  | 26.7  | 10.2 | 40.5 | 11.8 |
| chr2  | Duox2     | Intron11 | N | 122111076 | 122112218 | 6  | 74.2  | 44.3 | 62.2 | 34.8 |
| chr5  | Cdk8      | Intron11 | N | 147111153 | 147111267 | 1  | 67.7  | 50.7 | 77.4 | 50.0 |
| chr12 | Zfyve1    | Intron11 | N | 84936273  | 84937946  | 7  | 46.5  | 18.1 | 44.2 | 17.6 |
| chr14 | Atxn7     | Intron11 | N | 14933416  | 14935820  | 12 | 71.5  | 55.0 | 70.7 | 45.1 |
| chr14 | Ercc6     | Intron11 | N | 33374012  | 33375741  | 9  | 92.6  | 62.0 | 86.8 | 61.3 |
| chr7  | Trpm4     | Intron11 | N | 52570464  | 52572144  | 8  | 89.3  | 70.0 | 78.9 | 55.4 |
| chr8  | Ces1b     | Intron11 | N | 95597244  | 95599957  | 14 | 85.0  | 67.4 | 85.2 | 62.5 |
| chr4  | Nfib      | Intron11 | N | 82144674  | 82150634  | 25 | 69.2  | 47.9 | 84.6 | 63.0 |
| chr9  | Dapk2     | Intron11 | N | 66116758  | 66119433  | 13 | 88.1  | 51.1 | 68.9 | 47.7 |
| chr11 | Nf1       | Intron11 | N | 79226261  | 79232053  | 25 | 79.8  | 51.8 | 76.6 | 55.5 |
| chr19 | Abcc2     | Intron11 | N | 43883206  | 43884960  | 9  | 91.2  | 71.4 | 53.3 | 32.2 |
| chr14 | Rnf31     | Intron11 | N | 56215696  | 56217474  | 8  | 86.4  | 62.8 | 92.4 | 71.4 |
| chr7  | Zfp541    | Intron11 | N | 16676261  | 16677634  | 7  | 70.7  | 25.9 | 67.3 | 46.5 |
| chr7  | Eed       | Intron11 | N | 97125560  | 97128921  | 13 | 70.5  | 44.5 | 48.6 | 27.8 |
| chr11 | Tbrg4     | Intron11 | N | 6524287   | 6525151   | 5  | 42.4  | 19.6 | 47.2 | 26.5 |
| chr17 | Plg       | Intron11 | N | 12596099  | 12596878  | 4  | 79.7  | 50.0 | 66.2 | 45.8 |
| chr6  | Chn2      | Intron11 | N | 54245916  | 54248038  | 11 | 100.0 | 27.7 | 88.5 | 68.8 |
| chr19 | Lrp5      | Intron11 | N | 3610239   | 3612197   | 10 | 75.6  | 59.6 | 79.6 | 59.9 |
| chr7  | Rhpn2     | Intron11 | N | 36166551  | 36168987  | 12 | 80.2  | 42.9 | 65.4 | 46.4 |
| chr16 | Tnk2      | Intron11 | N | 32678072  | 32678754  | 3  | 75.4  | 41.6 | 64.3 | 46.1 |
| chr7  | Gltscr1   | Intron11 | N | 16578495  | 16581749  | 16 | 75.7  | 40.1 | 69.0 | 51.6 |
| chr5  | Smarcd3   | Intron11 | N | 24102668  | 24104409  | 7  | 68.9  | 49.5 | 52.9 | 35.7 |
| chr14 | Dock5     | Intron11 | N | 68389828  | 68391108  | 6  | 98.2  | 78.4 | 80.3 | 63.2 |
| chr11 | Itk       | Intron11 | N | 46167445  | 46169226  | 8  | 97.4  | 81.4 | 96.1 | 79.3 |
| chr10 | Enpp1     | Intron11 | N | 24377039  | 24377644  | 3  | 28.7  | 7.1  | 29.1 | 12.8 |
| chr15 | St13      | Intron11 | N | 81222753  | 81229914  | 34 | 63.6  | 41.3 | 54.1 | 38.0 |
| chr9  | Sema3f    | Intron12 | N | 107590681 | 107592016 | 7  | 72.6  | 34.3 | 72.7 | 11.3 |
| chr15 | Plec      | Intron12 | N | 76016945  | 76017040  | 1  | 80.0  | 12.5 | 71.5 | 13.6 |
| chr18 | Nars      | Intron12 | N | 64671532  | 64671637  | 1  | 55.0  | 20.0 | 76.6 | 23.4 |
| chr11 | Ankrd13b  | Intron12 | N | 77290248  | 77290792  | 3  | 39.7  | 13.9 | 69.3 | 16.2 |

|       |          |          |   |           |           |    |       |      |      |      |
|-------|----------|----------|---|-----------|-----------|----|-------|------|------|------|
| chr2  | Ggt7     | Intron12 | N | 155330558 | 155331690 | 6  | 70.3  | 17.0 | 63.0 | 10.9 |
| chr11 | Scpep1   | Intron12 | N | 88813869  | 88816607  | 13 | 85.3  | 54.4 | 89.9 | 46.0 |
| chr3  | Ilf2     | Intron12 | N | 90291020  | 90291148  | 2  | 88.6  | 58.3 | 92.3 | 48.5 |
| chr9  | Plxnb1   | Intron12 | N | 109008228 | 109008429 | 1  | 64.4  | 40.4 | 74.3 | 32.0 |
| chr16 | Ccdc14   | Intron12 | N | 34721956  | 34723095  | 6  | 87.7  | 67.9 | 87.0 | 49.4 |
| chr15 | Baiap2l2 | Intron12 | N | 79114524  | 79115004  | 2  | 50.8  | 14.2 | 53.0 | 15.6 |
| chr1  | Adhfe1   | Intron12 | N | 9553975   | 9556861   | 14 | 49.4  | 19.8 | 51.9 | 19.0 |
| chr9  | Col6a5   | Intron12 | N | 105794635 | 105797571 | 15 | 95.7  | 63.5 | 94.7 | 65.6 |
| chr19 | Eml3     | Intron12 | N | 9011251   | 9011618   | 2  | 72.2  | 51.4 | 70.2 | 42.5 |
| chr6  | Mug-ps1  | Intron12 | N | 122168735 | 122170878 | 11 | 69.7  | 33.0 | 59.0 | 31.4 |
| chr8  | Tpte     | Intron12 | N | 23431394  | 23435967  | 23 | 95.7  | 63.5 | 90.5 | 64.3 |
| chr9  | Gk5      | Intron12 | N | 96071974  | 96075108  | 15 | 75.3  | 54.9 | 79.7 | 53.7 |
| chr7  | Zdhhc13  | Intron12 | N | 56071853  | 56072515  | 3  | 92.9  | 55.2 | 77.6 | 52.0 |
| chr11 | Tbrg4    | Intron12 | N | 6525217   | 6525967   | 3  | 32.4  | 3.7  | 29.0 | 3.4  |
| chr3  | Wdr47    | Intron12 | N | 108440982 | 108441543 | 3  | 97.0  | 76.6 | 83.8 | 59.6 |
| chr18 | Riok3    | Intron12 | N | 12312530  | 12313728  | 6  | 74.4  | 52.4 | 84.2 | 60.2 |
| chr15 | Kcnh3    | Intron12 | N | 99070358  | 99071317  | 5  | 86.1  | 71.0 | 86.6 | 63.3 |
| chr15 | Slc38a2  | Intron12 | N | 96525941  | 96528352  | 12 | 42.9  | 25.3 | 39.5 | 16.2 |
| chr10 | Pcbp3    | Intron12 | N | 76262298  | 76263504  | 6  | 94.6  | 77.5 | 84.9 | 61.9 |
| chr5  | Rfc1     | Intron12 | N | 65670063  | 65670695  | 3  | 75.3  | 58.9 | 72.7 | 50.7 |
| chr5  | Radil    | Intron12 | N | 142983043 | 142984023 | 5  | 50.4  | 4.0  | 66.6 | 44.6 |
| chr9  | Pfkfb4   | Intron12 | N | 108930322 | 108931407 | 5  | 78.8  | 56.5 | 59.8 | 39.9 |
| chr8  | F11      | Intron12 | N | 46338483  | 46340557  | 10 | 50.5  | 0.0  | 17.2 | 0.0  |
| chr11 | Dock2    | Intron12 | N | 34154473  | 34156526  | 10 | 88.1  | 73.0 | 81.2 | 64.1 |
| chr1  | Npas2    | Intron12 | N | 39387867  | 39390654  | 14 | 67.5  | 34.2 | 63.8 | 46.9 |
| chr2  | Tgm2     | Intron12 | N | 157968911 | 157972026 | 13 | 80.4  | 59.0 | 79.2 | 62.5 |
| chr4  | Necab1   | Intron12 | N | 15067397  | 15075964  | 42 | 53.3  | 33.2 | 55.5 | 39.4 |
| chr5  | Ccdc63   | Intron12 | N | 122584903 | 122587872 | 16 | 75.6  | 55.9 | 74.9 | 59.7 |
| chr1  | Rfx8     | Intron12 | N | 39767090  | 39768222  | 6  | 82.3  | 61.7 | 86.0 | 70.9 |
| chr3  | Clca4    | Intron13 | N | 144510268 | 144512090 | 9  | 76.5  | 30.9 | 83.5 | 11.4 |
| chr3  | Clca1    | Intron13 | N | 144422276 | 144423527 | 6  | 75.0  | 47.4 | 96.7 | 44.1 |
| chr3  | Ilf2     | Intron13 | N | 90291240  | 90291380  | 2  | 88.6  | 58.3 | 92.3 | 48.5 |
| chr11 | Rap1gap2 | Intron13 | N | 74228023  | 74229733  | 9  | 69.3  | 7.8  | 53.1 | 18.0 |
| chr4  | Fkbp15   | Intron13 | N | 61985256  | 61987092  | 9  | 51.4  | 4.9  | 43.2 | 9.1  |
| chr13 | Gpr98    | Intron13 | N | 81536574  | 81544162  | 38 | 87.4  | 63.7 | 86.5 | 54.3 |
| chr2  | Slc23a2  | Intron13 | N | 131917066 | 131919877 | 14 | 85.7  | 43.3 | 60.5 | 28.5 |
| chr7  | Cd22     | Intron13 | N | 31663127  | 31664213  | 6  | 66.7  | 45.2 | 82.4 | 53.2 |
| chr4  | Slc5a9   | Intron13 | N | 111568958 | 111571154 | 11 | 87.7  | 41.5 | 70.0 | 41.6 |
| chr17 | Msln     | Intron13 | N | 25890008  | 25890322  | 2  | 70.0  | 42.9 | 79.2 | 52.0 |
| chr14 | Cacna1d  | Intron13 | N | 30888443  | 30888997  | 3  | 93.8  | 73.3 | 83.5 | 56.4 |
| chr2  | Cubn     | Intron13 | N | 13236437  | 13239783  | 16 | 100.0 | 70.7 | 65.0 | 38.3 |
| chr2  | Kif16b   | Intron13 | N | 142583685 | 142584525 | 4  | 76.5  | 43.6 | 60.4 | 35.2 |
| chr8  | Kat6a    | Intron13 | N | 24036943  | 24039687  | 14 | 90.2  | 67.0 | 86.2 | 61.1 |
| chr11 | Nf2      | Intron13 | N | 4716169   | 4718507   | 12 | 47.8  | 27.8 | 66.2 | 41.5 |
| chr15 | Baiap2l2 | Intron13 | N | 79115081  | 79115767  | 4  | 38.9  | 20.0 | 41.8 | 18.0 |
| chr16 | Tmprss2  | Intron13 | N | 97820930  | 97832625  | 55 | 53.6  | 36.6 | 50.5 | 27.8 |
| chr10 | Aim1     | Intron13 | N | 43696640  | 43699286  | 13 | 43.9  | 20.5 | 41.7 | 20.1 |
| chr1  | Atic     | Intron13 | N | 71622708  | 71623190  | 2  | 83.1  | 61.4 | 86.4 | 65.5 |
| chr9  | Ireb2    | Intron13 | N | 54745430  | 54747194  | 9  | 63.7  | 40.6 | 53.1 | 33.1 |



|       |               |          |   |           |           |    |       |      |      |      |
|-------|---------------|----------|---|-----------|-----------|----|-------|------|------|------|
| chr2  | Usp6nl        | Intron13 | N | 6348858   | 6351471   | 13 | 84.0  | 62.5 | 78.7 | 59.3 |
| chr15 | Wdr67         | Intron13 | N | 57783368  | 57784310  | 5  | 72.6  | 53.0 | 65.6 | 46.4 |
| chr2  | Fermt1        | Intron13 | N | 132765252 | 132767672 | 11 | 85.2  | 68.6 | 76.4 | 57.4 |
| chr17 | Nrxn1         | Intron13 | N | 91022964  | 91029224  | 31 | 93.2  | 33.3 | 81.3 | 64.4 |
| chr7  | Cln3          | Intron13 | N | 133725257 | 133726277 | 5  | 59.0  | 27.9 | 58.1 | 41.2 |
| chr15 | Map3k12       | Intron13 | N | 102336000 | 102339720 | 19 | 84.0  | 57.2 | 73.1 | 56.6 |
| chr11 | Map3k3        | Intron13 | N | 106012455 | 106012931 | 2  | 56.0  | 30.7 | 45.3 | 29.3 |
| chr17 | Rgs11         | Intron13 | N | 26344820  | 26344936  | 1  | 79.3  | 55.2 | 80.0 | 64.3 |
| chr4  | Map7d1        | Intron13 | N | 125917382 | 125917957 | 3  | 100.0 | 81.8 | 93.2 | 77.5 |
| chr11 | Map3k14       | Intron14 | N | 103102421 | 103103428 | 5  | 63.7  | 4.3  | 71.2 | 11.0 |
| chr5  | Zcwpw1        | Intron14 | N | 138259121 | 138260191 | 5  | 27.8  | 0.0  | 65.5 | 9.3  |
| chr9  | Trip4         | Intron14 | N | 65744738  | 65746183  | 8  | 67.3  | 16.4 | 88.1 | 38.1 |
| chr19 | Abcc2         | Intron14 | N | 43887006  | 43887679  | 3  | 74.6  | 41.1 | 87.2 | 43.2 |
| chr13 | F13a1         | Intron14 | N | 37139374  | 37142063  | 14 | 75.1  | 56.3 | 91.2 | 51.2 |
| chr2  | Samhd1        | Intron14 | N | 156952581 | 156955585 | 15 | 45.8  | 29.7 | 52.6 | 14.3 |
| chr14 | Ccdc66        | Intron14 | N | 28312076  | 28313426  | 7  | 48.6  | 28.4 | 56.0 | 21.6 |
| chr13 | Fam120a       | Intron14 | N | 49027763  | 49029318  | 8  | 71.6  | 39.1 | 68.2 | 34.2 |
| chr2  | Dhtkd1        | Intron14 | N | 5850879   | 5851820   | 5  | 50.7  | 24.3 | 87.1 | 53.2 |
| chr10 | Myb           | Intron14 | N | 20874562  | 20876145  | 8  | 61.7  | 36.7 | 54.6 | 23.4 |
| chr14 | Lrch1         | Intron14 | N | 75216940  | 75218298  | 7  | 59.2  | 36.2 | 85.0 | 55.6 |
| chr14 | Acox2         | Intron14 | N | 9089450   | 9091335   | 10 | 38.4  | 11.7 | 49.1 | 20.0 |
| chr11 | Rars          | Intron14 | N | 35646809  | 35647938  | 4  | 46.4  | 18.4 | 36.1 | 7.7  |
| chr13 | Sptlc1        | Intron14 | N | 53469439  | 53472661  | 14 | 68.0  | 38.8 | 72.9 | 52.0 |
| chr1  | Col4a3        | Intron14 | N | 82656862  | 82657400  | 3  | 80.6  | 56.8 | 71.2 | 51.0 |
| chr18 | Nars          | Intron14 | N | 64675060  | 64676069  | 4  | 41.3  | 20.3 | 35.2 | 15.4 |
| chr14 | Parp4         | Intron14 | N | 57221745  | 57226258  | 21 | 86.7  | 71.3 | 90.3 | 71.5 |
| chr10 | Slc5a4a       | Intron14 | N | 75649346  | 75651803  | 12 | 52.0  | 34.5 | 55.0 | 36.6 |
| chr8  | Pkd1l3        | Intron14 | N | 112160321 | 112162229 | 10 | 77.8  | 47.6 | 78.8 | 61.4 |
| chr1  | Adck3         | Intron14 | N | 182112379 | 182126003 | 66 | 58.7  | 39.2 | 55.0 | 38.9 |
| chr18 | 4833403l15Rik | Intron14 | N | 47049194  | 47050482  | 6  | 89.7  | 67.6 | 81.2 | 65.1 |
| chr7  | Cd177         | Intron14 | N | 25543469  | 25544619  | 6  | 73.1  | 46.4 | 63.1 | 47.9 |
| chr9  | Gramd1b       | Intron15 | N | 40124554  | 40125093  | 3  | 79.2  | 47.1 | 91.1 | 3.3  |
| chr11 | Sgsm2         | Intron15 | N | 74680139  | 74680532  | 2  | 79.3  | 59.0 | 93.2 | 31.7 |
| chr5  | Sdad1         | Intron15 | N | 92730913  | 92731664  | 4  | 68.2  | 5.0  | 63.3 | 10.2 |
| chr4  | 2010015L04Rik | Intron15 | N | 154808168 | 154808400 | 1  | 90.0  | 56.0 | 95.5 | 52.2 |
| chr13 | Naip1         | Intron15 | N | 101216303 | 101222752 | 32 | 79.4  | 59.4 | 79.6 | 41.3 |
| chr15 | Tg            | Intron15 | N | 66523950  | 66524808  | 4  | 78.9  | 58.5 | 64.7 | 33.3 |
| chr2  | Samhd1        | Intron15 | N | 156955653 | 156960614 | 23 | 92.6  | 75.6 | 70.0 | 39.2 |
| chr2  | Spg11         | Intron15 | N | 121896802 | 121897790 | 5  | 75.9  | 38.8 | 72.7 | 43.2 |
| chr2  | Rbm39         | Intron15 | N | 156003122 | 156004912 | 9  | 64.8  | 15.7 | 70.1 | 41.2 |
| chr16 | Mgrn1         | Intron15 | N | 4932299   | 4934194   | 10 | 76.4  | 46.8 | 77.4 | 48.9 |
| chr17 | Msln1         | Intron15 | N | 25883969  | 25884837  | 5  | 86.6  | 60.0 | 81.7 | 59.0 |
| chr9  | Dixdc1        | Intron15 | N | 50503689  | 50510024  | 26 | 75.9  | 53.4 | 58.6 | 36.6 |
| chr3  | Odf2l         | Intron15 | N | 144812042 | 144813923 | 9  | 92.0  | 76.9 | 90.0 | 68.6 |
| chr2  | Lrp4          | Intron15 | N | 91321027  | 91322014  | 5  | 64.0  | 45.0 | 68.0 | 48.1 |
| chr4  | Fhad1         | Intron15 | N | 141484400 | 141485444 | 5  | 44.6  | 29.1 | 57.4 | 39.0 |
| chr5  | Atp2a2        | Intron15 | N | 122921263 | 122923218 | 10 | 80.7  | 64.1 | 76.9 | 59.1 |
| chr13 | Nnt           | Intron15 | N | 120185784 | 120193358 | 38 | 91.1  | 72.3 | 84.7 | 66.9 |
| chr10 | Ccdc41        | Intron15 | N | 94251582  | 94252448  | 4  | 84.4  | 68.9 | 79.8 | 62.4 |

|       |          |          |   |           |           |     |       |      |      |      |
|-------|----------|----------|---|-----------|-----------|-----|-------|------|------|------|
| chr6  | Atp6v0a4 | Intron15 | N | 38036096  | 38037929  | 9   | 77.6  | 46.7 | 74.3 | 58.2 |
| chr1  | Stat4    | Intron15 | N | 52153713  | 52155230  | 8   | 84.3  | 46.0 | 83.4 | 68.2 |
| chr11 | Larp1    | Intron15 | N | 57866234  | 57868968  | 13  | 97.0  | 80.5 | 86.2 | 71.1 |
| chr5  | Ccdc146  | Intron16 | N | 20836568  | 20838837  | 11  | 80.6  | 55.5 | 79.5 | 17.2 |
| chr11 | Sgsm2    | Intron16 | N | 74680658  | 74681112  | 2   | 95.2  | 16.7 | 72.6 | 20.0 |
| chr2  | Znf512b  | Intron16 | N | 181325691 | 181327125 | 5   | 95.0  | 6.5  | 46.5 | 0.9  |
| chr16 | Prdm15   | Intron16 | N | 98038653  | 98039818  | 6   | 98.6  | 49.1 | 90.1 | 48.3 |
| chr13 | Fam65b   | Intron16 | N | 24802161  | 24805490  | 16  | 53.5  | 3.2  | 60.9 | 23.6 |
| chr6  | Lrig1    | Intron16 | N | 94580234  | 94604840  | 123 | 69.0  | 43.8 | 73.1 | 43.1 |
| chr7  | Eps8l2   | Intron16 | N | 148546327 | 148546900 | 4   | 84.3  | 58.7 | 91.8 | 70.7 |
| chr15 | Matn2    | Intron16 | N | 34362507  | 34362844  | 2   | 75.0  | 58.6 | 86.2 | 65.3 |
| chr5  | Sdad1    | Intron16 | N | 92731723  | 92732691  | 5   | 78.3  | 42.0 | 88.5 | 68.9 |
| chr7  | Cln3     | Intron16 | N | 133726962 | 133727687 | 3   | 36.5  | 21.4 | 35.8 | 16.7 |
| chr9  | Slc44a2  | Intron16 | N | 21151574  | 21152326  | 4   | 56.0  | 11.6 | 28.8 | 10.1 |
| chr7  | Muc5ac   | Intron16 | N | 148983836 | 148984372 | 3   | 80.0  | 64.9 | 42.9 | 25.0 |
| chr11 | Ewsr1    | Intron16 | N | 4993909   | 4999011   | 21  | 59.8  | 43.6 | 37.9 | 21.4 |
| chr9  | Cep164   | Intron16 | N | 45587304  | 45587464  | 1   | 96.0  | 68.2 | 91.9 | 75.6 |
| chr4  | Orc1     | Intron16 | N | 108285762 | 108286885 | 6   | 86.9  | 63.7 | 91.2 | 75.1 |
| chr12 | Daam1    | Intron16 | N | 73059761  | 73060792  | 5   | 82.0  | 54.5 | 82.0 | 66.1 |
| chr8  | Mau2     | Intron16 | N | 72555458  | 72557077  | 8   | 64.1  | 27.9 | 65.0 | 50.0 |
| chr11 | Sec24a   | Intron17 | N | 51545408  | 51546893  | 7   | 75.5  | 50.9 | 89.1 | 39.0 |
| chr13 | Adamts16 | Intron17 | N | 70932104  | 70934327  | 11  | 29.0  | 4.0  | 45.8 | 1.9  |
| chr3  | Postn    | Intron17 | N | 54184415  | 54187309  | 14  | 92.8  | 69.6 | 91.7 | 58.8 |
| chr11 | Cpd      | Intron17 | N | 76626234  | 76626984  | 4   | 44.6  | 19.1 | 50.3 | 18.6 |
| chr1  | Col4a3   | Intron17 | N | 82659525  | 82661151  | 8   | 100.0 | 62.9 | 68.4 | 40.7 |
| chr5  | Rbm33    | Intron17 | N | 28737300  | 28739826  | 13  | 91.8  | 64.9 | 89.0 | 65.2 |
| chr12 | Hdac9    | Intron17 | N | 35075218  | 35078147  | 11  | 79.8  | 64.2 | 87.3 | 65.3 |
| chr12 | Lamb1    | Intron17 | N | 31986076  | 31987426  | 7   | 67.0  | 38.4 | 75.0 | 56.1 |
| chr9  | Ldlr     | Intron17 | N | 21551751  | 21552584  | 4   | 83.3  | 67.3 | 76.3 | 59.3 |
| chr6  | Lrig1    | Intron17 | N | 94604916  | 94613920  | 45  | 85.5  | 56.1 | 76.5 | 59.6 |
| chr3  | Vav3     | Intron17 | N | 109366123 | 109377023 | 54  | 56.2  | 30.7 | 52.6 | 37.1 |
| chr13 | Kif2a    | Intron17 | N | 107780173 | 107783242 | 15  | 43.5  | 20.0 | 68.2 | 52.7 |
| chr12 | Efr3b    | Intron17 | N | 3983519   | 3984533   | 5   | 66.7  | 35.6 | 49.3 | 33.9 |
| chr17 | Baiap3   | Intron17 | N | 25384139  | 25384254  | 1   | 69.2  | 54.0 | 71.8 | 56.5 |
| chr11 | Helz     | Intron17 | N | 107493665 | 107496293 | 13  | 86.1  | 65.6 | 86.8 | 71.7 |
| chr2  | Siglec1  | Intron17 | N | 130909282 | 130909526 | 1   | 71.7  | 48.7 | 63.6 | 48.6 |
| chr10 | Col18a1  | Intron18 | N | 76532244  | 76532564  | 2   | 68.0  | 37.5 | 76.0 | 21.6 |
| chr8  | Nlrc5    | Intron18 | N | 97015471  | 97016230  | 4   | 92.9  | 54.4 | 44.5 | 1.9  |
| chr6  | Lrig1    | Intron18 | N | 94613993  | 94649455  | 172 | 35.6  | 4.5  | 46.9 | 6.3  |
| chr10 | Pan2     | Intron18 | N | 127752714 | 127752831 | 1   | 59.4  | 31.8 | 59.2 | 23.3 |
| chr3  | Sema6c   | Intron18 | N | 94975312  | 94975479  | 1   | 21.7  | 3.8  | 39.7 | 4.2  |
| chr18 | Jakmip2  | Intron18 | N | 43735214  | 43736953  | 9   | 91.7  | 68.9 | 93.5 | 66.1 |
| chr17 | Abcc10   | Intron18 | N | 46459243  | 46460300  | 5   | 75.0  | 26.0 | 51.3 | 28.1 |
| chr1  | Plekha6  | Intron18 | N | 135181964 | 135182823 | 4   | 73.5  | 56.1 | 77.8 | 55.2 |
| chr19 | Aldh18a1 | Intron18 | N | 40660683  | 40662799  | 8   | 59.8  | 41.8 | 72.4 | 50.0 |
| chr17 | Ppp4r1   | Intron18 | N | 66187365  | 66188157  | 4   | 39.2  | 22.0 | 79.4 | 57.6 |
| chr9  | Megf11   | Intron18 | N | 64540291  | 64541567  | 6   | 66.7  | 20.7 | 55.2 | 33.6 |
| chr7  | Clasrp   | Intron18 | N | 20180358  | 20180807  | 2   | 83.8  | 30.3 | 51.4 | 32.7 |
| chr19 | Fam178a  | Intron18 | N | 45050206  | 45053650  | 17  | 96.7  | 68.5 | 70.8 | 52.8 |

|       |               |          |   |           |           |    |      |      |      |      |
|-------|---------------|----------|---|-----------|-----------|----|------|------|------|------|
| chr5  | A330021E22Rik | Intron18 | N | 5640228   | 5644423   | 20 | 55.1 | 36.6 | 57.8 | 40.5 |
| chr15 | Tars          | Intron18 | N | 11327017  | 11329240  | 10 | 41.5 | 25.6 | 34.5 | 17.3 |
| chr9  | Mlh1          | Intron18 | N | 111170813 | 111173912 | 14 | 88.9 | 49.1 | 51.9 | 34.8 |
| chr19 | Sf3b2         | Intron18 | N | 5293320   | 5294298   | 5  | 97.5 | 56.9 | 63.1 | 47.1 |
| chr11 | Cntrob        | Intron18 | N | 69135436  | 69136191  | 4  | 65.5 | 36.2 | 52.7 | 36.9 |
| chr7  | Ptprh         | Intron18 | N | 4553959   | 4554649   | 3  | 72.8 | 32.5 | 45.7 | 30.1 |
| chr4  | Rars2         | Intron18 | N | 34604491  | 34606739  | 11 | 72.3 | 52.5 | 64.0 | 49.0 |
| chr7  | Ptprh         | Intron19 | N | 4554816   | 4555388   | 4  | 67.4 | 43.5 | 75.6 | 32.3 |
| chr16 | Tmprs15       | Intron19 | N | 79057965  | 79062381  | 20 | 88.3 | 70.6 | 65.3 | 27.4 |
| chr6  | Plekha5       | Intron19 | N | 140518708 | 140518841 | 1  | 69.2 | 30.1 | 65.7 | 27.9 |
| chr9  | Ccdc33        | Intron19 | N | 57965439  | 57966241  | 4  | 74.2 | 50.0 | 72.7 | 46.8 |
| chr14 | Itih3         | Intron19 | N | 31735223  | 31736005  | 4  | 73.7 | 36.4 | 53.4 | 31.4 |
| chr1  | Pik3c2b       | Intron19 | N | 134987439 | 134988137 | 3  | 16.2 | 0.0  | 22.7 | 3.3  |
| chr2  | Mroh8         | Intron19 | N | 157080762 | 157082062 | 7  | 44.1 | 23.9 | 40.6 | 23.6 |
| chr16 | Usp7          | Intron19 | N | 8700296   | 8702054   | 9  | 59.9 | 36.6 | 73.5 | 57.4 |
| chr18 | Dmxl1         | Intron2  | N | 50000167  | 50003439  | 13 | 58.5 | 38.6 | 97.3 | 6.9  |
| chr17 | Rgmb          | Intron2  | N | 15958143  | 15962975  | 21 | 70.4 | 5.6  | 74.9 | 6.9  |
| chr3  | Cp            | Intron2  | N | 19864528  | 19866238  | 9  | 82.2 | 53.7 | 76.7 | 10.8 |
| chr8  | Slc25a42      | Intron2  | N | 72712351  | 72712731  | 2  | 62.5 | 3.4  | 61.5 | 2.4  |
| chr7  | Ccdc9         | Intron2  | N | 16860725  | 16861086  | 3  | 87.5 | 48.1 | 66.7 | 10.2 |
| chr11 | Fam196b       | Intron2  | N | 34303306  | 34304277  | 5  | 95.5 | 36.5 | 65.7 | 10.9 |
| chr19 | Fads2         | Intron2  | N | 10139302  | 10140091  | 4  | 70.8 | 52.5 | 77.3 | 23.8 |
| chr3  | Arhgef26      | Intron2  | N | 62145306  | 62149067  | 19 | 63.4 | 29.0 | 83.6 | 30.7 |
| chr15 | Polr3h        | Intron2  | N | 81747832  | 81748697  | 4  | 92.9 | 48.4 | 89.4 | 37.1 |
| chr13 | Nnt           | Intron2  | N | 120127299 | 120128633 | 7  | 75.1 | 53.5 | 86.0 | 34.4 |
| chr8  | Cyba          | Intron2  | N | 124950168 | 124950835 | 3  | 72.6 | 26.9 | 56.6 | 5.2  |
| chr19 | Taf6l         | Intron2  | N | 8850009   | 8852576   | 13 | 91.6 | 64.5 | 88.2 | 38.6 |
| chr5  | Abcb1a        | Intron2  | N | 8660733   | 8664545   | 18 | 65.0 | 2.6  | 50.4 | 1.7  |
| chr17 | Zfp760        | Intron2  | N | 21845690  | 21846171  | 3  | 76.5 | 60.0 | 81.4 | 33.9 |
| chr6  | Ninj2         | Intron2  | N | 120148153 | 120148660 | 3  | 76.3 | 50.0 | 61.8 | 15.1 |
| chr6  | Nop2          | Intron2  | N | 125082337 | 125083536 | 4  | 77.7 | 58.5 | 86.9 | 41.7 |
| chr1  | 4930444P10Rik | Intron2  | N | 16058937  | 16068648  | 49 | 65.2 | 37.7 | 79.8 | 35.5 |
| chr11 | Card14        | Intron2  | N | 119178215 | 119178318 | 2  | 91.3 | 71.1 | 82.4 | 38.2 |
| chr19 | Fam45a        | Intron2  | N | 60890712  | 60893433  | 14 | 82.7 | 62.3 | 91.3 | 47.6 |
| chr6  | Tmem106b      | Intron2  | N | 13020415  | 13021741  | 7  | 96.0 | 47.9 | 58.3 | 14.8 |
| chr17 | Tmem8         | Intron2  | N | 26253879  | 26253963  | 1  | 36.0 | 5.3  | 46.3 | 2.9  |
| chr11 | BC018473      | Intron2  | N | 116614980 | 116615647 | 3  | 47.2 | 0.3  | 44.0 | 0.7  |
| chr17 | Msrb1         | Intron2  | N | 24876593  | 24877024  | 2  | 52.5 | 5.8  | 57.9 | 15.9 |
| chr6  | Slco1b2       | Intron2  | N | 141581686 | 141582904 | 6  | 95.1 | 46.9 | 79.4 | 38.6 |
| chr5  | 5033403H07Rik | Intron2  | N | 53381977  | 53383452  | 6  | 29.3 | 9.8  | 43.6 | 3.1  |
| chr6  | Mfap5         | Intron2  | N | 122464419 | 122465365 | 5  | 97.1 | 74.6 | 84.3 | 43.9 |
| chr2  | Fam210b       | Intron2  | N | 172177125 | 172178085 | 5  | 52.1 | 18.3 | 47.3 | 7.0  |
| chr19 | Plcb3         | Intron2  | N | 7028958   | 7029194   | 1  | 77.1 | 29.3 | 71.8 | 33.9 |
| chr6  | Plxnd1        | Intron2  | N | 115906098 | 115906612 | 3  | 76.2 | 23.8 | 87.5 | 49.6 |
| chr11 | Mtfp1         | Intron2  | N | 3994037   | 3994391   | 2  | 52.7 | 28.6 | 52.9 | 15.4 |
| chr1  | Kcnj13        | Intron2  | N | 89285981  | 89291186  | 27 | 74.4 | 26.0 | 77.5 | 41.4 |
| chr11 | Axin2         | Intron2  | N | 108785417 | 108792752 | 37 | 58.4 | 25.9 | 65.5 | 29.7 |
| chr6  | Ptpn6         | Intron2  | N | 124671241 | 124671593 | 2  | 38.0 | 0.7  | 35.5 | 0.0  |
| chr5  | Tmem33        | Intron2  | N | 67652273  | 67654968  | 11 | 93.2 | 47.4 | 96.1 | 61.4 |

|       |               |         |   |           |           |    |      |      |      |      |
|-------|---------------|---------|---|-----------|-----------|----|------|------|------|------|
| chr4  | Ak2           | Intron2 | N | 128676504 | 128679394 | 14 | 62.8 | 44.5 | 58.0 | 23.3 |
| chr4  | Uqcrh         | Intron2 | N | 115742630 | 115743341 | 4  | 61.8 | 1.5  | 36.2 | 1.6  |
| chr5  | Anapc5        | Intron2 | N | 123238474 | 123241616 | 16 | 71.6 | 15.0 | 91.4 | 56.9 |
| chr7  | Zc3h4         | Intron2 | N | 17002342  | 17002639  | 1  | 78.7 | 52.5 | 74.7 | 40.2 |
| chr11 | BC096441      | Intron2 | N | 69497495  | 69497719  | 1  | 65.8 | 31.8 | 72.5 | 38.3 |
| chr3  | Dennd2d       | Intron2 | N | 106289967 | 106290768 | 5  | 82.0 | 55.3 | 83.0 | 49.5 |
| chr7  | Prmt3         | Intron2 | N | 57034084  | 57035678  | 5  | 54.6 | 17.9 | 59.9 | 27.5 |
| chr10 | Rdh1          | Intron2 | N | 127200280 | 127201737 | 7  | 30.2 | 0.0  | 35.5 | 4.0  |
| chr2  | Cdca7         | Intron2 | N | 72317086  | 72319747  | 13 | 89.7 | 60.9 | 86.7 | 55.2 |
| chr6  | 2310001H17Rik | Intron2 | N | 129183172 | 129187756 | 19 | 59.5 | 23.7 | 66.5 | 35.0 |
| chr11 | Arsg          | Intron2 | N | 109346888 | 109347019 | 2  | 78.6 | 55.9 | 73.9 | 42.9 |
| chr7  | Mrv1          | Intron2 | N | 118020491 | 118021655 | 6  | 90.7 | 14.3 | 50.0 | 19.0 |
| chr4  | Pdik1l        | Intron2 | N | 133840463 | 133843541 | 9  | 41.9 | 23.4 | 55.1 | 24.5 |
| chr4  | Edn2          | Intron2 | N | 119834633 | 119835994 | 7  | 85.7 | 18.8 | 43.7 | 14.1 |
| chr9  | Traip         | Intron2 | N | 107858254 | 107858676 | 2  | 88.6 | 59.9 | 71.0 | 41.7 |
| chr1  | Imp4          | Intron2 | N | 34496995  | 34499754  | 12 | 96.2 | 81.0 | 61.1 | 31.9 |
| chr19 | Ms4a18        | Intron2 | N | 11074939  | 11076384  | 7  | 93.5 | 70.7 | 82.7 | 54.0 |
| chr9  | Ube2q2        | Intron2 | N | 55010877  | 55016009  | 24 | 96.2 | 73.0 | 78.5 | 49.9 |
| chr7  | 1700003G18Rik | Intron2 | N | 123230270 | 123232626 | 12 | 79.5 | 45.2 | 76.0 | 47.4 |
| chr1  | Bok           | Intron2 | N | 95583247  | 95585733  | 11 | 80.8 | 48.0 | 73.4 | 44.9 |
| chr2  | Tm9sf4        | Intron2 | N | 153004739 | 153008123 | 17 | 64.9 | 36.3 | 67.2 | 39.3 |
| chr11 | Asic2         | Intron2 | N | 80695184  | 80696923  | 9  | 86.1 | 46.2 | 73.7 | 46.2 |
| chr3  | Scamp3        | Intron2 | N | 88981990  | 88983016  | 5  | 57.7 | 41.5 | 33.7 | 6.9  |
| chr7  | Tmem80        | Intron2 | N | 148517461 | 148518808 | 8  | 87.1 | 18.2 | 67.7 | 41.0 |
| chr1  | Utp14b        | Intron2 | N | 78656966  | 78659715  | 15 | 63.8 | 25.3 | 57.5 | 30.9 |
| chr19 | Gm10814       | Intron2 | N | 6014357   | 6014868   | 4  | 23.9 | 6.5  | 31.2 | 4.7  |
| chr6  | Rpusd3        | Intron2 | N | 113366441 | 113366782 | 2  | 39.8 | 17.9 | 36.7 | 10.2 |
| chr16 | Ets2          | Intron2 | N | 95928100  | 95931378  | 16 | 47.0 | 16.5 | 45.6 | 19.1 |
| chr1  | Hnrnpu        | Intron2 | N | 180260071 | 180260295 | 1  | 41.0 | 8.1  | 39.2 | 12.8 |
| chr7  | Bccip         | Intron2 | N | 140905946 | 140906581 | 3  | 60.8 | 3.8  | 54.0 | 27.8 |
| chr7  | Crym          | Intron2 | N | 127333325 | 127333965 | 3  | 20.4 | 2.0  | 25.8 | 0.0  |
| chr6  | Cd9           | Intron2 | N | 125411328 | 125412131 | 4  | 72.7 | 27.8 | 82.7 | 57.1 |
| chr8  | Nr2c2ap       | Intron2 | N | 72655908  | 72656310  | 3  | 54.0 | 38.2 | 57.8 | 32.2 |
| chr2  | Gzf1          | Intron2 | N | 148510705 | 148512249 | 8  | 76.7 | 59.6 | 90.5 | 65.1 |
| chr1  | Ralgs2        | Intron2 | N | 158741668 | 158743568 | 10 | 84.2 | 27.6 | 59.7 | 34.3 |
| chr19 | Dtx4          | Intron2 | N | 12547810  | 12552615  | 24 | 66.1 | 45.7 | 64.7 | 39.6 |
| chr11 | Gnb2l1        | Intron2 | N | 48615337  | 48615774  | 4  | 38.8 | 6.0  | 37.8 | 12.7 |
| chr9  | Zfp653        | Intron2 | N | 21860537  | 21860857  | 1  | 32.8 | 12.6 | 39.7 | 14.7 |
| chr9  | Slc24a1       | Intron2 | N | 64774143  | 64774969  | 4  | 82.7 | 54.4 | 64.2 | 39.4 |
| chr11 | Cntd1         | Intron2 | N | 101144782 | 101145034 | 1  | 51.0 | 22.5 | 48.9 | 24.1 |
| chr13 | Trim38        | Intron2 | N | 23877842  | 23880079  | 11 | 86.8 | 65.5 | 77.5 | 53.1 |
| chr4  | Tmem54        | Intron2 | N | 128785649 | 128787618 | 10 | 86.9 | 55.2 | 80.3 | 56.0 |
| chr3  | 5730460C07Rik | Intron2 | N | 153454400 | 153454845 | 2  | 82.5 | 65.7 | 48.8 | 24.7 |
| chr7  | Aen           | Intron2 | N | 86047717  | 86050728  | 15 | 74.6 | 47.8 | 81.4 | 57.3 |
| chr1  | Uhmk1         | Intron2 | N | 172135335 | 172137244 | 10 | 94.2 | 77.6 | 96.1 | 72.1 |
| chr11 | Prr15l        | Intron2 | N | 96792868  | 96795828  | 15 | 57.7 | 42.0 | 56.6 | 32.9 |
| chr3  | Snapin        | Intron2 | N | 90294195  | 90294469  | 1  | 17.2 | 0.0  | 25.0 | 1.5  |
| chr15 | Faim2         | Intron2 | N | 99341067  | 99342926  | 9  | 72.3 | 41.9 | 69.7 | 46.6 |
| chr6  | Tada3         | Intron2 | N | 113320402 | 113320932 | 3  | 59.4 | 17.8 | 49.7 | 26.7 |

|       |               |         |   |           |           |    |       |      |      |      |
|-------|---------------|---------|---|-----------|-----------|----|-------|------|------|------|
| chr19 | Capn1         | Intron2 | N | 5990051   | 5990337   | 1  | 21.4  | 4.5  | 30.7 | 7.8  |
| chr5  | Rpl6          | Intron2 | N | 121655673 | 121655762 | 1  | 46.2  | 18.2 | 36.4 | 13.8 |
| chr8  | Csnk2a2       | Intron2 | N | 97977344  | 97979757  | 12 | 77.2  | 44.9 | 82.9 | 60.4 |
| chr16 | 4930578N18Rik | Intron2 | N | 76154096  | 76155985  | 9  | 86.3  | 68.0 | 94.5 | 72.0 |
| chr17 | Noxo1         | Intron2 | N | 24835354  | 24835462  | 1  | 16.1  | 0.0  | 22.5 | 0.0  |
| chr8  | Wdr17         | Intron2 | N | 55717850  | 55720797  | 15 | 76.9  | 14.3 | 64.9 | 42.4 |
| chr13 | Akr1c12       | Intron2 | N | 4269490   | 4271441   | 9  | 81.3  | 51.6 | 68.4 | 46.0 |
| chr6  | Tpi1          | Intron2 | N | 124761623 | 124761899 | 2  | 72.4  | 53.7 | 76.7 | 54.4 |
| chr10 | Palm          | Intron2 | N | 79269437  | 79269778  | 2  | 86.0  | 65.0 | 79.3 | 57.1 |
| chr5  | Acads         | Intron2 | N | 115561160 | 115561327 | 2  | 70.0  | 53.8 | 93.0 | 71.0 |
| chr11 | Ddx5          | Intron2 | N | 106644008 | 106645272 | 7  | 83.3  | 55.8 | 76.0 | 54.0 |
| chr12 | Brf1          | Intron2 | N | 114199493 | 114199933 | 2  | 91.5  | 66.7 | 87.8 | 65.7 |
| chr8  | Bag4          | Intron2 | N | 26880009  | 26881550  | 8  | 70.1  | 54.9 | 76.6 | 54.7 |
| chr17 | Nfkbie        | Intron2 | N | 45695547  | 45696156  | 3  | 82.8  | 60.9 | 79.6 | 57.8 |
| chr8  | 1810012K16Rik | Intron2 | N | 23509751  | 23509916  | 2  | 60.8  | 17.1 | 45.9 | 24.2 |
| chr17 | Akap8         | Intron2 | N | 32443531  | 32446363  | 14 | 87.9  | 62.5 | 79.1 | 57.4 |
| chr7  | Stard5        | Intron2 | N | 90781296  | 90781639  | 2  | 29.5  | 2.8  | 21.6 | 0.0  |
| chr18 | Tmco6         | Intron2 | N | 36895155  | 36897110  | 9  | 60.1  | 40.0 | 59.2 | 37.7 |
| chr19 | Hells         | Intron2 | N | 39006003  | 39009903  | 19 | 64.7  | 43.2 | 48.8 | 27.5 |
| chr1  | Pm20d1        | Intron2 | N | 133695260 | 133697670 | 12 | 43.2  | 8.0  | 59.9 | 38.6 |
| chr6  | Ssbp1         | Intron2 | N | 40422133  | 40424663  | 13 | 62.4  | 46.8 | 66.1 | 44.9 |
| chr16 | Ildr1         | Intron2 | N | 36708507  | 36709564  | 5  | 34.2  | 17.3 | 45.7 | 24.8 |
| chr15 | Rad1          | Intron2 | N | 10416472  | 10417744  | 6  | 53.6  | 37.7 | 78.7 | 57.9 |
| chr1  | Traf3ip3      | Intron2 | N | 195004495 | 195005686 | 6  | 74.3  | 26.4 | 61.1 | 40.5 |
| chr4  | Rps8          | Intron2 | N | 116827034 | 116827242 | 3  | 38.9  | 15.4 | 42.6 | 22.1 |
| chr6  | Zfml          | Intron2 | N | 83880160  | 83884942  | 22 | 100.0 | 47.6 | 83.9 | 63.6 |
| chr10 | Cisd1         | Intron2 | N | 70799168  | 70807471  | 39 | 64.2  | 41.8 | 71.0 | 50.9 |
| chr7  | Slc1a5        | Intron2 | N | 17371068  | 17371697  | 3  | 85.0  | 57.5 | 82.4 | 62.4 |
| chr11 | Irf1          | Intron2 | N | 53584878  | 53586340  | 7  | 89.9  | 66.8 | 84.1 | 64.3 |
| chr18 | 4930592I03Rik | Intron2 | N | 83089662  | 83089910  | 2  | 86.6  | 67.0 | 80.5 | 61.1 |
| chr11 | Phykpl        | Intron2 | N | 51399135  | 51400062  | 5  | 89.4  | 61.9 | 61.6 | 42.4 |
| chr6  | Cml5          | Intron2 | N | 85770706  | 85770900  | 2  | 65.7  | 30.4 | 60.7 | 41.6 |
| chr12 | Plekhg3       | Intron2 | N | 77661506  | 77663192  | 8  | 95.1  | 55.5 | 93.6 | 74.4 |
| chr12 | Hs1bp3        | Intron2 | N | 8324757   | 8328324   | 18 | 52.4  | 35.0 | 63.7 | 44.8 |
| chr4  | Txn1          | Intron2 | N | 57958085  | 57963710  | 28 | 66.8  | 45.2 | 49.6 | 31.0 |
| chr10 | Slc18b1       | Intron2 | N | 23518692  | 23523563  | 23 | 59.8  | 43.6 | 53.5 | 35.1 |
| chr17 | Trem14        | Intron2 | N | 48404352  | 48408751  | 22 | 62.4  | 43.6 | 60.2 | 41.8 |
| chr19 | Rbm14         | Intron2 | N | 4804016   | 4811171   | 33 | 73.7  | 55.5 | 60.2 | 41.8 |
| chr6  | Cops7a        | Intron2 | N | 124909969 | 124910108 | 1  | 73.6  | 30.6 | 59.7 | 41.5 |
| chr15 | Krt8          | Intron2 | N | 101828150 | 101828283 | 1  | 78.9  | 62.1 | 83.9 | 65.7 |
| chr4  | Extl1         | Intron2 | N | 133914062 | 133914999 | 5  | 78.1  | 46.0 | 68.9 | 50.9 |
| chr12 | Degs2         | Intron2 | N | 109930847 | 109940370 | 45 | 48.3  | 20.9 | 35.5 | 17.5 |
| chr11 | Dlx3          | Intron2 | N | 94983213  | 94984722  | 6  | 69.8  | 39.7 | 56.8 | 38.9 |
| chr8  | Irf8          | Intron2 | N | 123263892 | 123267605 | 19 | 73.8  | 51.5 | 76.3 | 58.6 |
| chr11 | Gabarap       | Intron2 | N | 69805946  | 69806083  | 1  | 17.9  | 1.4  | 19.1 | 1.4  |
| chr1  | Aldh9a1       | Intron2 | N | 169282797 | 169284557 | 9  | 93.4  | 64.4 | 87.6 | 70.0 |
| chr10 | Dnajc14       | Intron2 | N | 128244677 | 128251093 | 32 | 80.2  | 64.7 | 84.4 | 66.9 |
| chr9  | Acaa1a        | Intron2 | N | 119251037 | 119251840 | 3  | 83.3  | 42.7 | 62.7 | 45.3 |
| chr9  | Hcrr2         | Intron2 | N | 76078534  | 76080706  | 11 | 84.1  | 66.7 | 82.0 | 64.9 |

|       |           |          |   |           |           |    |      |      |      |      |
|-------|-----------|----------|---|-----------|-----------|----|------|------|------|------|
| chr14 | Mapk1ip1l | Intron2  | N | 47928264  | 47930089  | 9  | 94.8 | 79.3 | 77.8 | 60.9 |
| chr8  | Rfwd3     | Intron2  | N | 113797923 | 113800119 | 11 | 83.4 | 61.9 | 86.0 | 69.2 |
| chr12 | Apob      | Intron2  | N | 7985058   | 7986058   | 5  | 84.4 | 51.4 | 66.4 | 49.5 |
| chr9  | Vipr1     | Intron2  | N | 121563023 | 121567164 | 21 | 47.2 | 23.1 | 35.1 | 18.5 |
| chr5  | Tmem120a  | Intron2  | N | 136211836 | 136211939 | 1  | 85.8 | 56.0 | 92.5 | 75.9 |
| chr4  | Ybx1      | Intron2  | N | 118951805 | 118954174 | 12 | 84.6 | 64.7 | 81.8 | 65.3 |
| chr11 | Lypd8     | Intron2  | N | 58193212  | 58195786  | 13 | 36.8 | 18.0 | 30.3 | 13.8 |
| chr5  | Cox19     | Intron2  | N | 139818629 | 139821025 | 11 | 67.3 | 38.4 | 42.8 | 26.5 |
| chr4  | Fam131c   | Intron2  | N | 140935709 | 140936233 | 3  | 61.5 | 29.3 | 48.2 | 31.8 |
| chr2  | Acbd5     | Intron2  | N | 22925140  | 22931009  | 28 | 34.8 | 10.8 | 59.0 | 42.8 |
| chr19 | Rad9a     | Intron2  | N | 4196383   | 4197112   | 4  | 51.9 | 27.9 | 26.2 | 10.1 |
| chr11 | Rnf167    | Intron2  | N | 70461612  | 70462722  | 5  | 51.3 | 34.8 | 51.8 | 35.7 |
| chr7  | Vmn2r30   | Intron2  | N | 7269907   | 7275760   | 15 | 81.6 | 65.4 | 76.9 | 60.9 |
| chr14 | Pdlim2    | Intron2  | N | 70566015  | 70567467  | 7  | 72.3 | 51.1 | 72.0 | 56.0 |
| chr4  | Klhl21    | Intron2  | N | 151386815 | 151388415 | 8  | 94.4 | 59.3 | 84.6 | 68.8 |
| chr13 | Eif4e1b   | Intron2  | N | 54885924  | 54886169  | 1  | 58.4 | 35.7 | 55.2 | 39.5 |
| chr8  | Otud4     | Intron2  | N | 82167737  | 82170196  | 11 | 88.3 | 65.0 | 91.9 | 76.3 |
| chr7  | Kcnn4     | Intron2  | N | 25159787  | 25162301  | 11 | 91.0 | 51.3 | 74.9 | 59.3 |
| chr11 | Gga3      | Intron2  | N | 115447511 | 115447629 | 1  | 83.6 | 63.4 | 78.2 | 62.6 |
| chr6  | Frmd4b    | Intron2  | N | 97242490  | 97245569  | 15 | 56.6 | 27.5 | 41.3 | 25.8 |
| chr13 | Zscan26   | Intron2  | N | 21539764  | 21541309  | 8  | 50.1 | 29.6 | 49.4 | 34.1 |
| chr18 | Gramd3    | Intron2  | N | 56629307  | 56633672  | 22 | 49.6 | 19.7 | 45.1 | 29.8 |
| chr8  | Amfr      | Intron2  | N | 96498144  | 96498635  | 2  | 94.7 | 54.3 | 65.7 | 50.6 |
| chr8  | Fto       | Intron2  | N | 93925784  | 93933121  | 37 | 62.5 | 46.8 | 60.2 | 45.1 |
| chr12 | Sypl      | Intron2  | N | 33639225  | 33650237  | 48 | 21.8 | 3.8  | 17.6 | 2.5  |
| chr17 | Myom1     | Intron20 | N | 71436911  | 71439162  | 11 | 58.9 | 21.5 | 57.2 | 35.6 |
| chr9  | Usp28     | Intron20 | N | 48844066  | 48845281  | 6  | 88.0 | 55.3 | 67.2 | 47.3 |
| chr7  | Nadsyn1   | Intron20 | N | 151007138 | 151008563 | 6  | 70.9 | 31.5 | 61.0 | 45.1 |
| chr6  | C2cd5     | Intron20 | N | 143026982 | 143028388 | 7  | 82.4 | 29.5 | 84.3 | 68.5 |
| chr10 | Pwp2      | Intron20 | N | 77646916  | 77647815  | 3  | 55.0 | 21.0 | 39.6 | 23.9 |
| chr15 | Adcy6     | Intron20 | N | 98431492  | 98434304  | 14 | 46.6 | 7.1  | 34.1 | 18.5 |
| chr6  | Ptpro     | Intron21 | N | 137391243 | 137392038 | 4  | 70.4 | 30.1 | 81.9 | 33.4 |
| chr1  | Unc80     | Intron21 | N | 66598825  | 66601500  | 12 | 90.0 | 65.5 | 92.9 | 56.8 |
| chr6  | Gucy2c    | Intron21 | N | 136709293 | 136711518 | 11 | 59.3 | 25.7 | 53.5 | 21.7 |
| chr16 | Dgkg      | Intron21 | N | 22599961  | 22600511  | 3  | 60.3 | 29.8 | 66.7 | 37.2 |
| chr9  | Usp28     | Intron21 | N | 48845362  | 48845872  | 3  | 85.4 | 62.2 | 79.6 | 53.6 |
| chr5  | Hfm1      | Intron21 | N | 107318969 | 107321716 | 13 | 42.7 | 20.1 | 48.6 | 23.8 |
| chr1  | Pik3c2b   | Intron21 | N | 134988942 | 134990232 | 6  | 88.9 | 67.5 | 84.3 | 59.9 |
| chr14 | Appl1     | Intron21 | N | 27778144  | 27783586  | 23 | 62.5 | 44.4 | 66.7 | 46.8 |
| chr2  | Ralgapb   | Intron21 | N | 158291708 | 158292471 | 4  | 87.0 | 67.9 | 86.3 | 69.6 |
| chr3  | Arhgap29  | Intron22 | N | 121715092 | 121717018 | 10 | 85.9 | 61.7 | 71.6 | 4.4  |
| chr10 | Cabin1    | Intron22 | N | 75200261  | 75200955  | 3  | 82.1 | 30.6 | 81.6 | 34.7 |
| chr7  | Adam8     | Intron22 | N | 147176248 | 147177244 | 5  | 59.6 | 14.6 | 63.4 | 30.6 |
| chr7  | Nphs1     | Intron22 | N | 31259672  | 31262877  | 16 | 74.1 | 52.8 | 73.7 | 51.0 |
| chr4  | Abca1     | Intron22 | N | 53080028  | 53081558  | 8  | 70.0 | 52.0 | 66.3 | 48.0 |
| chr9  | Adamts7   | Intron22 | N | 90090916  | 90091837  | 5  | 62.5 | 30.6 | 50.5 | 32.8 |
| chr16 | Pdxdc1    | Intron22 | N | 13887864  | 13903007  | 72 | 67.9 | 50.4 | 62.1 | 44.9 |
| chr7  | Abca14    | Intron22 | N | 127426756 | 127432971 | 31 | 87.3 | 49.1 | 87.3 | 70.6 |
| chr7  | C2cd3     | Intron22 | N | 107579337 | 107580480 | 6  | 40.0 | 22.6 | 65.3 | 49.3 |

|       |               |          |   |           |           |     |      |      |      |      |
|-------|---------------|----------|---|-----------|-----------|-----|------|------|------|------|
| chr1  | Gigyf2        | Intron22 | N | 89330492  | 89333343  | 14  | 67.3 | 39.9 | 78.8 | 63.4 |
| chr15 | Bai1          | Intron23 | N | 74404599  | 74406268  | 8   | 63.0 | 5.4  | 70.4 | 20.2 |
| chr2  | Ccdc141       | Intron23 | N | 77006691  | 77008441  | 8   | 97.8 | 49.0 | 95.8 | 61.5 |
| chr12 | Hdac9         | Intron23 | N | 35118097  | 35122001  | 18  | 60.0 | 43.0 | 79.7 | 62.1 |
| chr2  | Ralgapa2      | Intron24 | N | 146237896 | 146238469 | 3   | 32.1 | 10.6 | 59.2 | 9.0  |
| chr1  | Armc9         | Intron24 | N | 88171131  | 88172234  | 6   | 62.7 | 10.3 | 73.4 | 51.6 |
| chr16 | Ttc3          | Intron24 | N | 94647851  | 94648372  | 3   | 82.1 | 44.1 | 55.0 | 35.4 |
| chr1  | Col4a4        | Intron24 | N | 82493913  | 82494402  | 2   | 81.8 | 54.5 | 80.6 | 64.1 |
| chr11 | Obscn         | Intron24 | N | 58834071  | 58834921  | 4   | 82.7 | 62.0 | 78.5 | 62.9 |
| chr11 | Spag9         | Intron25 | N | 93969941  | 93973346  | 16  | 92.2 | 63.5 | 95.0 | 56.1 |
| chr8  | Edc4          | Intron25 | N | 108415034 | 108415118 | 1   | 51.4 | 14.3 | 61.4 | 31.1 |
| chr1  | Spta1         | Intron25 | N | 176141787 | 176142668 | 4   | 47.4 | 9.0  | 53.0 | 26.0 |
| chr1  | Hdlbp         | Intron25 | N | 95334961  | 95337256  | 11  | 93.9 | 69.2 | 89.6 | 67.0 |
| chr4  | Ptprd         | Intron25 | N | 75784478  | 75785197  | 2   | 71.2 | 38.6 | 60.0 | 39.5 |
| chr8  | Sf3b3         | Intron25 | N | 113368500 | 113370574 | 8   | 61.1 | 41.6 | 55.2 | 40.0 |
| chr1  | 2310035C23Rik | Intron26 | N | 107642763 | 107646898 | 20  | 69.8 | 52.2 | 77.1 | 52.5 |
| chr5  | Nos1          | Intron26 | N | 118399838 | 118402773 | 15  | 66.9 | 51.5 | 67.4 | 45.2 |
| chr11 | Cep112        | Intron27 | N | 108720722 | 108721505 | 4   | 60.2 | 42.7 | 59.3 | 10.0 |
| chr2  | Kcnt1         | Intron27 | N | 25765457  | 25765785  | 2   | 74.3 | 36.2 | 75.2 | 38.0 |
| chr10 | Syne1         | Intron27 | N | 5235167   | 5235505   | 1   | 84.6 | 45.5 | 76.7 | 52.4 |
| chr8  | Pnpla6        | Intron27 | N | 3537020   | 3537248   | 1   | 52.3 | 24.1 | 32.1 | 13.3 |
| chr18 | Atp8b1        | Intron27 | N | 64765055  | 64820353  | 269 | 70.3 | 54.1 | 66.4 | 50.1 |
| chr15 | Col2a1        | Intron28 | N | 97817272  | 97817723  | 2   | 82.5 | 62.3 | 85.4 | 66.2 |
| chr2  | Ubr3          | Intron29 | N | 69831870  | 69838514  | 31  | 67.8 | 35.7 | 76.2 | 50.2 |
| chr8  | Trappc11      | Intron29 | N | 48616232  | 48618672  | 11  | 62.8 | 37.5 | 40.6 | 15.6 |
| chr17 | Prrc2a        | Intron29 | N | 35299325  | 35299816  | 2   | 58.3 | 42.4 | 48.7 | 27.2 |
| chr8  | Ddx60         | Intron29 | N | 64479501  | 64488738  | 44  | 73.8 | 54.8 | 80.3 | 59.8 |
| chr11 | Itgae         | Intron29 | N | 72954265  | 72959042  | 24  | 79.7 | 59.3 | 75.6 | 59.1 |
| chr14 | Ldb3          | Intron3  | N | 35355175  | 35355612  | 2   | 62.3 | 6.7  | 84.8 | 1.3  |
| chr17 | Pkmyt1        | Intron3  | N | 23871284  | 23871932  | 3   | 65.2 | 0.0  | 78.1 | 3.4  |
| chr7  | Mef2a         | Intron3  | N | 74385327  | 74389406  | 19  | 76.5 | 54.7 | 81.0 | 11.6 |
| chr1  | Faim3         | Intron3  | N | 132771731 | 132772539 | 4   | 55.6 | 23.0 | 81.2 | 14.7 |
| chr9  | Arhgap32      | Intron3  | N | 32052840  | 32053502  | 3   | 38.9 | 0.0  | 56.5 | 0.0  |
| chr19 | Capn1         | Intron3  | N | 5990455   | 5991538   | 5   | 66.7 | 25.0 | 86.6 | 32.8 |
| chr15 | Dazap2        | Intron3  | N | 100448602 | 100449798 | 6   | 80.0 | 47.8 | 74.0 | 20.5 |
| chr5  | 0610040J01Rik | Intron3  | N | 64287723  | 64289193  | 7   | 71.5 | 45.6 | 69.4 | 20.2 |
| chr15 | Krt71         | Intron3  | N | 101567199 | 101568376 | 6   | 43.5 | 12.5 | 59.9 | 11.8 |
| chr6  | Cd9           | Intron3  | N | 125412222 | 125412344 | 1   | 87.0 | 56.8 | 96.9 | 49.0 |
| chr4  | D4Wsu53e      | Intron3  | N | 134481348 | 134482649 | 7   | 78.6 | 63.0 | 76.9 | 29.7 |
| chr11 | Rnft1         | Intron3  | N | 86300235  | 86302568  | 12  | 82.1 | 61.6 | 87.4 | 43.4 |
| chr5  | Snx17         | Intron3  | N | 31497287  | 31497787  | 3   | 89.6 | 23.5 | 89.2 | 45.5 |
| chr9  | Arih2         | Intron3  | N | 108509688 | 108510239 | 3   | 79.5 | 52.2 | 89.6 | 47.3 |
| chr1  | Slc19a2       | Intron3  | N | 166191149 | 166192177 | 4   | 96.4 | 53.1 | 78.0 | 36.8 |
| chr4  | 1700024P16Rik | Intron3  | N | 104621438 | 104623457 | 10  | 64.1 | 44.0 | 69.2 | 29.8 |
| chr19 | Lzts2         | Intron3  | N | 45098695  | 45099208  | 1   | 69.6 | 14.3 | 57.4 | 20.3 |
| chr13 | Slc25a48      | Intron3  | N | 56550431  | 56552381  | 10  | 63.0 | 35.7 | 74.9 | 37.9 |
| chr7  | Kcne3         | Intron3  | N | 107329785 | 107331242 | 9   | 47.6 | 16.3 | 45.1 | 9.2  |
| chr12 | 2210039B01Rik | Intron3  | N | 74651229  | 74652142  | 5   | 33.7 | 6.0  | 38.7 | 3.0  |
| chr1  | Inpp1         | Intron3  | N | 52851515  | 52853884  | 12  | 84.7 | 50.8 | 85.7 | 50.0 |

|       |               |         |   |           |           |    |      |      |      |      |
|-------|---------------|---------|---|-----------|-----------|----|------|------|------|------|
| chr10 | Arhgap18      | Intron3 | N | 26569917  | 26574679  | 24 | 83.2 | 65.0 | 92.1 | 59.1 |
| chr7  | Etfb          | Intron3 | N | 50708328  | 50709887  | 8  | 62.1 | 43.3 | 58.2 | 26.3 |
| chr9  | Taf1d         | Intron3 | N | 15113360  | 15114302  | 5  | 25.0 | 1.9  | 31.8 | 0.0  |
| chr11 | Cntd1         | Intron3 | N | 101145207 | 101146073 | 4  | 40.5 | 8.5  | 39.4 | 7.7  |
| chr10 | Arhgap9       | Intron3 | N | 126762687 | 126762899 | 1  | 41.8 | 14.4 | 49.8 | 18.7 |
| chr3  | Ifi44l        | Intron3 | N | 151424481 | 151425680 | 5  | 81.1 | 54.9 | 80.9 | 51.4 |
| chr4  | Kif12         | Intron3 | N | 62827542  | 62827967  | 2  | 47.4 | 10.3 | 44.8 | 15.3 |
| chr9  | Nr2e3         | Intron3 | N | 59795361  | 59796169  | 4  | 82.0 | 45.9 | 90.6 | 61.5 |
| chr10 | 1500009L16Rik | Intron3 | N | 83220226  | 83220878  | 3  | 67.6 | 52.5 | 70.1 | 42.0 |
| chr11 | Vmp1          | Intron3 | N | 86415572  | 86420677  | 26 | 44.8 | 8.7  | 27.8 | 0.0  |
| chr8  | Mylk3         | Intron3 | N | 87852583  | 87860266  | 37 | 82.1 | 60.8 | 84.1 | 57.9 |
| chr11 | Mtmr3         | Intron3 | N | 4388636   | 4389624   | 5  | 88.7 | 70.7 | 94.2 | 68.6 |
| chr6  | Fam115a       | Intron3 | N | 42627030  | 42627328  | 1  | 72.0 | 49.0 | 75.6 | 50.0 |
| chr7  | Bccip         | Intron3 | N | 140906663 | 140908543 | 9  | 71.6 | 36.4 | 74.7 | 49.2 |
| chr5  | 1700028E10Rik | Intron3 | N | 152210643 | 152216201 | 28 | 61.0 | 33.4 | 62.8 | 37.8 |
| chr9  | Pkm           | Intron3 | N | 59513762  | 59516355  | 13 | 72.8 | 46.7 | 77.7 | 52.9 |
| chr2  | Ube2c         | Intron3 | N | 164596880 | 164597353 | 2  | 86.0 | 41.7 | 62.5 | 37.7 |
| chr10 | Madcam1       | Intron3 | N | 79128503  | 79129083  | 3  | 56.7 | 36.9 | 63.7 | 39.1 |
| chr11 | Nhp2          | Intron3 | N | 51436093  | 51436593  | 4  | 87.3 | 66.7 | 79.2 | 54.6 |
| chr13 | Dsp           | Intron3 | N | 38259534  | 38260474  | 5  | 94.4 | 60.6 | 95.7 | 71.1 |
| chr7  | Tufm          | Intron3 | N | 133631941 | 133632163 | 1  | 64.9 | 43.2 | 61.5 | 37.3 |
| chr19 | Fads2         | Intron3 | N | 10140172  | 10140741  | 3  | 18.2 | 0.0  | 24.0 | 0.0  |
| chr18 | Zfp191        | Intron3 | N | 24176670  | 24179212  | 10 | 17.2 | 2.1  | 26.1 | 2.5  |
| chr11 | Nufip2        | Intron3 | N | 77519044  | 77523184  | 21 | 82.3 | 54.9 | 77.5 | 54.4 |
| chr1  | Nuak2         | Intron3 | N | 134222807 | 134224273 | 7  | 69.6 | 54.0 | 77.0 | 54.6 |
| chr1  | Aldh9a1       | Intron3 | N | 169284688 | 169285802 | 6  | 43.8 | 15.9 | 59.2 | 36.9 |
| chr7  | Fan1          | Intron3 | N | 71494398  | 71494920  | 3  | 85.1 | 67.9 | 92.5 | 70.3 |
| chr7  | Eps8l2        | Intron3 | N | 148528010 | 148528824 | 4  | 75.4 | 39.5 | 62.5 | 40.4 |
| chr14 | 4930471C04Rik | Intron3 | N | 64722339  | 64722937  | 4  | 73.2 | 49.5 | 74.0 | 52.0 |
| chr4  | Extl1         | Intron3 | N | 133915161 | 133915663 | 3  | 86.0 | 66.2 | 81.2 | 59.4 |
| chr7  | Lamtor1       | Intron3 | N | 109058621 | 109058933 | 2  | 71.2 | 54.2 | 68.6 | 47.3 |
| chr17 | BC004004      | Intron3 | N | 29419213  | 29419622  | 2  | 63.9 | 3.3  | 37.4 | 16.8 |
| chr15 | Pdzd2         | Intron3 | N | 12297836  | 12298373  | 3  | 51.5 | 27.0 | 57.1 | 36.9 |
| chr7  | Uqcrc2        | Intron3 | N | 127781512 | 127783747 | 11 | 96.8 | 71.7 | 94.0 | 74.3 |
| chr12 | lfrd1         | Intron3 | N | 40931013  | 40933575  | 13 | 66.7 | 49.2 | 67.7 | 47.9 |
| chr3  | Trim46        | Intron3 | N | 89041842  | 89042819  | 5  | 44.3 | 18.2 | 33.9 | 14.2 |
| chr4  | Hmgcl         | Intron3 | N | 135508394 | 135509771 | 7  | 95.2 | 38.1 | 57.6 | 38.3 |
| chr2  | Oser1         | Intron3 | N | 163241392 | 163245147 | 16 | 48.6 | 31.1 | 54.0 | 34.7 |
| chr16 | Prodh         | Intron3 | N | 18073747  | 18076334  | 12 | 70.3 | 55.1 | 62.4 | 43.1 |
| chr1  | Serpinb8      | Intron3 | N | 109495615 | 109499376 | 19 | 82.3 | 64.7 | 85.2 | 65.9 |
| chr10 | Hsd17b6       | Intron3 | N | 127431644 | 127434753 | 16 | 88.8 | 72.9 | 86.5 | 67.4 |
| chr13 | Trim27        | Intron3 | N | 21275832  | 21279909  | 20 | 67.6 | 50.1 | 73.5 | 54.4 |
| chr9  | Rbpms2        | Intron3 | N | 65497813  | 65498368  | 3  | 48.6 | 31.7 | 63.5 | 44.4 |
| chr11 | Sgsm2         | Intron3 | N | 74665339  | 74666576  | 6  | 97.8 | 81.3 | 80.1 | 61.7 |
| chr9  | Ppcdc         | Intron3 | N | 57268099  | 57268932  | 4  | 56.1 | 18.4 | 44.0 | 25.6 |
| chr17 | Themis3       | Intron3 | N | 66942624  | 66943786  | 6  | 87.8 | 63.2 | 87.5 | 69.4 |
| chr15 | Fam173b       | Intron3 | N | 31537989  | 31539320  | 7  | 29.2 | 4.6  | 21.9 | 4.1  |
| chr11 | Hsf5          | Intron3 | N | 87445192  | 87449112  | 19 | 79.0 | 57.5 | 84.0 | 66.3 |
| chr19 | Slc22a29      | Intron3 | N | 8237248   | 8243644   | 31 | 74.5 | 46.6 | 79.2 | 61.6 |



|       |               |          |   |           |           |    |       |      |      |      |
|-------|---------------|----------|---|-----------|-----------|----|-------|------|------|------|
| chr2  | Bpifb5        | Intron3  | N | 154052932 | 154053798 | 4  | 81.0  | 64.5 | 63.8 | 46.3 |
| chr9  | Atp2c1        | Intron3  | N | 105320476 | 105320873 | 2  | 97.9  | 48.2 | 93.3 | 75.8 |
| chr19 | Cabp4         | Intron3  | N | 4137217   | 4138548   | 7  | 74.4  | 58.9 | 80.7 | 63.2 |
| chr15 | Krt18         | Intron3  | N | 101860411 | 101861049 | 3  | 89.7  | 74.0 | 90.0 | 72.7 |
| chr12 | Tcl1b1        | Intron3  | N | 106403750 | 106404242 | 3  | 79.0  | 55.8 | 68.7 | 51.7 |
| chr2  | Stom          | Intron3  | N | 35177207  | 35179183  | 10 | 81.4  | 55.8 | 65.6 | 48.7 |
| chr8  | Bag4          | Intron3  | N | 26881806  | 26887894  | 29 | 79.1  | 59.3 | 77.3 | 60.6 |
| chr15 | 4930447A16Rik | Intron3  | N | 37369371  | 37370232  | 6  | 77.4  | 54.4 | 64.1 | 47.5 |
| chr11 | Jmjd6         | Intron3  | N | 116701860 | 116702382 | 3  | 84.7  | 13.0 | 69.4 | 53.1 |
| chr2  | Ppp1r14d      | Intron3  | N | 119044584 | 119055277 | 53 | 83.7  | 61.9 | 82.1 | 65.9 |
| chr2  | 9430008C03Rik | Intron3  | N | 158185068 | 158186199 | 7  | 41.6  | 19.6 | 37.5 | 21.3 |
| chr7  | EU599041      | Intron3  | N | 50479332  | 50481081  | 8  | 87.0  | 66.5 | 90.1 | 74.0 |
| chr3  | D3ErtD751e    | Intron3  | N | 41550651  | 41552594  | 10 | 95.2  | 75.9 | 87.5 | 71.4 |
| chr6  | Clec2e        | Intron3  | N | 129045219 | 129048380 | 16 | 55.8  | 32.5 | 40.2 | 24.2 |
| chr11 | Chmp6         | Intron3  | N | 119777034 | 119777338 | 2  | 28.9  | 2.2  | 17.8 | 1.8  |
| chr16 | Itsn1         | Intron3  | N | 91784401  | 91785532  | 6  | 29.7  | 3.2  | 67.1 | 51.1 |
| chr11 | Axin2         | Intron3  | N | 108792894 | 108800625 | 39 | 80.2  | 49.1 | 77.5 | 61.6 |
| chr4  | Plod1         | Intron3  | N | 147290053 | 147291413 | 7  | 80.4  | 60.8 | 83.1 | 67.5 |
| chr19 | Fth1          | Intron3  | N | 10058818  | 10059049  | 2  | 92.4  | 75.9 | 91.2 | 75.6 |
| chr6  | Gpr19         | Intron3  | N | 134847232 | 134847849 | 2  | 18.5  | 2.3  | 16.4 | 0.8  |
| chr2  | 4930526D03Rik | Intron3  | N | 181432369 | 181433111 | 4  | 79.0  | 56.1 | 70.1 | 54.6 |
| chr4  | Nadk          | Intron3  | N | 154953504 | 154958245 | 24 | 83.0  | 67.2 | 69.2 | 53.7 |
| chr5  | Hadhb         | Intron3  | N | 30490611  | 30493204  | 13 | 39.1  | 11.9 | 44.0 | 28.6 |
| chr10 | Atp5b         | Intron3  | N | 127521528 | 127522146 | 5  | 89.5  | 46.5 | 54.2 | 38.8 |
| chr5  | Chchd2        | Intron3  | N | 130360055 | 130363067 | 13 | 95.1  | 75.5 | 71.2 | 55.9 |
| chr1  | Rnasel        | Intron3  | N | 155600078 | 155600736 | 4  | 73.3  | 29.7 | 72.7 | 57.5 |
| chr3  | Phf17         | Intron3  | N | 41392945  | 41395604  | 13 | 67.5  | 48.3 | 64.6 | 49.6 |
| chr1  | Pik3c2b       | Intron30 | N | 135000012 | 135000377 | 2  | 60.0  | 32.8 | 82.0 | 21.7 |
| chr11 | Cltc          | Intron30 | N | 86547347  | 86550572  | 16 | 72.2  | 53.5 | 74.9 | 27.2 |
| chr9  | Atm           | Intron30 | N | 53290549  | 53292177  | 7  | 96.2  | 65.0 | 92.2 | 67.1 |
| chr17 | Myom1         | Intron30 | N | 71459181  | 71460046  | 4  | 77.7  | 34.9 | 81.8 | 58.8 |
| chr9  | Arhgef12      | Intron30 | N | 42818337  | 42823985  | 26 | 72.2  | 47.6 | 70.8 | 50.9 |
| chr6  | Plixnd1       | Intron30 | N | 115926497 | 115926587 | 1  | 66.7  | 50.0 | 66.1 | 48.8 |
| chr14 | Stab1         | Intron30 | N | 31961118  | 31961203  | 1  | 92.6  | 42.9 | 80.0 | 63.2 |
| chr3  | Med12l        | Intron31 | N | 59063636  | 59064665  | 6  | 52.6  | 25.2 | 64.3 | 35.9 |
| chr11 | 2310067B10Rik | Intron31 | N | 115659293 | 115659588 | 1  | 63.6  | 30.7 | 46.0 | 24.0 |
| chr14 | Rnf17         | Intron31 | N | 57128173  | 57131047  | 13 | 95.0  | 75.2 | 80.9 | 60.6 |
| chr2  | Eif2ak4       | Intron32 | N | 118292176 | 118293897 | 9  | 100.0 | 67.2 | 83.5 | 50.0 |
| chr10 | Mon2          | Intron32 | N | 122488825 | 122489240 | 2  | 46.6  | 21.4 | 41.2 | 11.8 |
| chr17 | Lrpprc        | Intron32 | N | 85170891  | 85171432  | 3  | 62.5  | 32.4 | 63.0 | 43.9 |
| chr11 | Top2a         | Intron32 | N | 98880256  | 98883024  | 14 | 85.4  | 56.4 | 89.7 | 74.3 |
| chr19 | Myof          | Intron33 | N | 38031040  | 38034203  | 16 | 83.5  | 27.7 | 72.2 | 32.0 |
| chr3  | Notch2        | Intron33 | N | 97949143  | 97949975  | 4  | 70.9  | 39.0 | 75.4 | 48.6 |
| chr1  | Rab3gap2      | Intron33 | N | 187106390 | 187107260 | 4  | 62.2  | 29.0 | 54.6 | 33.6 |
| chr9  | Col6a4        | Intron33 | N | 105974890 | 105977152 | 11 | 82.4  | 61.9 | 73.9 | 56.1 |
| chr4  | Myom3         | Intron33 | N | 135364875 | 135366663 | 9  | 54.8  | 31.6 | 44.6 | 26.9 |
| chr5  | Ptpn13        | Intron33 | N | 103997204 | 103998448 | 6  | 20.9  | 0.0  | 62.6 | 46.0 |
| chr11 | Abca6         | Intron34 | N | 110105708 | 110106531 | 4  | 79.7  | 37.2 | 80.4 | 45.6 |
| chr14 | Tep1          | Intron34 | N | 51464849  | 51465090  | 1  | 77.2  | 47.7 | 79.3 | 52.2 |

|       |           |          |   |           |           |    |      |      |       |      |
|-------|-----------|----------|---|-----------|-----------|----|------|------|-------|------|
| chr16 | Ttc3      | Intron34 | N | 94666158  | 94669605  | 13 | 48.3 | 30.7 | 65.9  | 40.0 |
| chr1  | Kif1a     | Intron34 | N | 94959524  | 94960725  | 6  | 45.7 | 24.8 | 45.9  | 30.7 |
| chr4  | Unc13b    | Intron36 | N | 43271822  | 43272333  | 3  | 79.3 | 45.3 | 74.8  | 29.8 |
| chr15 | Myh9      | Intron36 | N | 77622777  | 77626390  | 18 | 85.3 | 65.0 | 80.9  | 61.0 |
| chr9  | Myo9a     | Intron36 | N | 59753892  | 59755154  | 6  | 92.0 | 74.4 | 100.0 | 81.4 |
| chr1  | Kif1a     | Intron37 | N | 94963712  | 94965061  | 7  | 90.1 | 25.4 | 65.0  | 40.6 |
| chr2  | Fbn1      | Intron37 | N | 125187043 | 125188197 | 6  | 71.9 | 39.8 | 55.0  | 34.5 |
| chr15 | Myo10     | Intron38 | N | 25736933  | 25737490  | 3  | 89.6 | 64.9 | 77.8  | 40.7 |
| chr5  | Fryl      | Intron38 | N | 73486713  | 73487512  | 4  | 95.9 | 67.5 | 94.0  | 74.5 |
| chr5  | Hgfac     | Intron4  | N | 35385584  | 35386208  | 3  | 92.3 | 0.0  | 88.2  | 0.0  |
| chr16 | Phldb2    | Intron4  | N | 45757359  | 45758229  | 4  | 64.0 | 17.0 | 82.1  | 14.5 |
| chr4  | Slc30a2   | Intron4  | N | 133903409 | 133904391 | 5  | 47.4 | 1.4  | 65.8  | 3.9  |
| chr12 | Tmx1      | Intron4  | N | 71559895  | 71561331  | 7  | 92.2 | 61.8 | 67.6  | 11.4 |
| chr3  | Ppid      | Intron4  | N | 79401796  | 79402713  | 5  | 35.4 | 6.9  | 70.7  | 15.1 |
| chr7  | Nlrp6     | Intron4  | N | 148110056 | 148111014 | 5  | 83.1 | 9.6  | 79.6  | 26.2 |
| chr19 | Gm10814   | Intron4  | N | 6016484   | 6017797   | 7  | 69.0 | 32.9 | 70.6  | 20.3 |
| chr13 | Grk6      | Intron4  | N | 55551946  | 55552288  | 2  | 92.9 | 50.8 | 86.0  | 37.4 |
| chr1  | Slc23a3   | Intron4  | N | 75125584  | 75125971  | 2  | 63.2 | 22.8 | 68.0  | 20.6 |
| chr1  | Arfgef1   | Intron4  | N | 10132826  | 10134798  | 10 | 86.4 | 54.9 | 89.7  | 42.4 |
| chr6  | Clec2e    | Intron4  | N | 129048507 | 129050803 | 11 | 74.8 | 27.5 | 84.7  | 37.6 |
| chr4  | Aldob     | Intron4  | N | 49552669  | 49554002  | 7  | 60.0 | 40.0 | 86.1  | 41.4 |
| chr13 | Slc6a19   | Intron4  | N | 73821848  | 73823212  | 7  | 64.6 | 38.1 | 68.2  | 26.4 |
| chr6  | Cald1     | Intron4  | N | 34703589  | 34705633  | 9  | 82.0 | 47.7 | 81.2  | 40.5 |
| chr1  | Vil1      | Intron4  | N | 74465131  | 74466142  | 5  | 55.9 | 17.3 | 57.5  | 18.1 |
| chr7  | Swap70    | Intron4  | N | 117407622 | 117409349 | 9  | 51.6 | 26.2 | 65.4  | 26.7 |
| chr17 | Rrp1b     | Intron4  | N | 32185584  | 32186370  | 4  | 65.0 | 47.2 | 67.6  | 31.4 |
| chr7  | Bnip3     | Intron4  | N | 146089761 | 146090363 | 3  | 90.8 | 46.6 | 37.6  | 1.4  |
| chr1  | Lamc1     | Intron4  | N | 155074841 | 155075864 | 5  | 91.5 | 65.2 | 95.7  | 59.6 |
| chr11 | Myh2      | Intron4  | N | 66987071  | 66988444  | 7  | 85.3 | 63.9 | 89.4  | 53.3 |
| chr2  | Dok5      | Intron4  | N | 170655689 | 170658381 | 13 | 90.9 | 51.8 | 91.1  | 55.0 |
| chr12 | Serpina1f | Intron4  | N | 104932233 | 104932806 | 3  | 84.6 | 49.9 | 67.6  | 33.3 |
| chr13 | Mcidas    | Intron4  | N | 113787124 | 113787570 | 2  | 54.8 | 16.2 | 47.5  | 13.9 |
| chr11 | Gsdma2    | Intron4  | N | 98510966  | 98512157  | 6  | 89.8 | 50.9 | 79.4  | 46.1 |
| chr18 | Aqp4      | Intron4  | N | 15558512  | 15562108  | 18 | 55.4 | 31.3 | 52.8  | 20.1 |
| chr8  | Col4a1    | Intron4  | N | 11206404  | 11207193  | 4  | 72.7 | 24.4 | 76.8  | 45.5 |
| chr7  | Sphk2     | Intron4  | N | 52967976  | 52968629  | 3  | 34.0 | 2.0  | 33.6  | 2.6  |
| chr8  | Plekhg4   | Intron4  | N | 107900414 | 107900493 | 1  | 52.2 | 16.4 | 50.8  | 20.5 |
| chr17 | Epcam     | Intron4  | N | 88039869  | 88040773  | 5  | 43.9 | 9.6  | 41.4  | 11.2 |
| chr11 | Cant1     | Intron4  | N | 118272826 | 118278887 | 31 | 66.7 | 26.0 | 58.1  | 28.6 |
| chr9  | Spa17     | Intron4  | N | 37419604  | 37421140  | 6  | 91.2 | 48.4 | 87.4  | 58.2 |
| chr4  | Ldlrad1   | Intron4  | N | 106888883 | 106890370 | 7  | 89.7 | 52.4 | 83.1  | 55.4 |
| chr4  | Txn1      | Intron4  | N | 57964774  | 57969058  | 18 | 40.8 | 19.7 | 31.8  | 4.3  |
| chr9  | Cox5a     | Intron4  | N | 57379600  | 57380088  | 3  | 18.0 | 0.0  | 44.8  | 18.1 |
| chr17 | Prss27    | Intron4  | N | 24181499  | 24181825  | 2  | 29.2 | 3.1  | 28.9  | 3.0  |
| chr11 | Nbr1      | Intron4  | N | 101417606 | 101420832 | 16 | 92.2 | 30.5 | 77.2  | 51.4 |
| chr19 | Capn1     | Intron4  | N | 5991618   | 5991855   | 1  | 63.1 | 33.7 | 68.8  | 43.2 |
| chr19 | Fra10ac1  | Intron4  | N | 38274169  | 38276036  | 9  | 61.9 | 46.8 | 85.7  | 60.3 |
| chr1  | Ppfia4    | Intron4  | N | 136197116 | 136200181 | 15 | 77.9 | 56.8 | 70.4  | 46.5 |
| chr9  | Map4      | Intron4  | N | 109928728 | 109930182 | 7  | 89.3 | 61.7 | 86.4  | 62.5 |

|       |               |          |   |           |           |    |       |      |      |      |
|-------|---------------|----------|---|-----------|-----------|----|-------|------|------|------|
| chr7  | C230079O03Rik | Intron4  | N | 143540565 | 143541002 | 2  | 57.1  | 28.0 | 67.0 | 43.3 |
| chr9  | Snx1          | Intron4  | N | 65938538  | 65940965  | 12 | 40.9  | 15.0 | 47.1 | 23.7 |
| chr3  | Phtf1         | Intron4  | N | 103785879 | 103786868 | 5  | 55.0  | 2.8  | 77.8 | 54.5 |
| chr4  | Mpl           | Intron4  | N | 118119120 | 118121150 | 9  | 33.1  | 3.8  | 53.9 | 30.8 |
| chr12 | Itgb1bp1      | Intron4  | N | 21280764  | 21282680  | 10 | 100.0 | 84.6 | 90.5 | 67.7 |
| chr2  | Cdk5rap1      | Intron4  | N | 154174518 | 154176553 | 10 | 92.3  | 77.1 | 86.3 | 63.6 |
| chr4  | Zc3h12a       | Intron4  | N | 124799638 | 124803849 | 21 | 85.2  | 33.2 | 52.9 | 30.4 |
| chr3  | Gucy1a3       | Intron4  | N | 81910170  | 81912515  | 12 | 83.2  | 60.7 | 81.6 | 59.3 |
| chr15 | Foxred2       | Intron4  | N | 77778950  | 77782399  | 17 | 84.0  | 68.1 | 84.7 | 62.6 |
| chr11 | Cldn7         | Intron4  | N | 69780807  | 69781056  | 2  | 30.3  | 12.4 | 36.2 | 14.2 |
| chr8  | Nek3          | Intron4  | N | 23242666  | 23243464  | 5  | 52.8  | 27.0 | 46.8 | 24.8 |
| chr4  | Lzic          | Intron4  | N | 148862838 | 148867307 | 22 | 84.8  | 65.3 | 78.3 | 56.6 |
| chr9  | Slc25a36      | Intron4  | N | 96993597  | 96997521  | 19 | 85.0  | 69.2 | 70.2 | 49.2 |
| chr3  | Rabggbt       | Intron4  | N | 153572424 | 153572509 | 1  | 58.3  | 42.5 | 71.2 | 50.5 |
| chr11 | Vmp1          | Intron4  | N | 86420795  | 86424843  | 20 | 74.9  | 59.5 | 62.0 | 41.3 |
| chr6  | Phb2          | Intron4  | N | 124664187 | 124664847 | 3  | 57.4  | 41.0 | 58.3 | 37.7 |
| chr3  | Adh5          | Intron4  | N | 138110904 | 138113862 | 15 | 83.4  | 62.1 | 85.4 | 65.4 |
| chr1  | Serpib5       | Intron4  | N | 108771738 | 108772586 | 4  | 67.1  | 35.5 | 45.6 | 25.7 |
| chr9  | Fbxl2         | Intron4  | N | 113893704 | 113894390 | 3  | 33.3  | 12.2 | 67.9 | 48.1 |
| chr16 | Ostn          | Intron4  | N | 27347054  | 27350493  | 18 | 89.5  | 40.0 | 90.7 | 71.1 |
| chr5  | 2210019I11Rik | Intron4  | N | 148050990 | 148052122 | 6  | 62.6  | 43.7 | 44.8 | 25.3 |
| chr13 | Sgtb          | Intron4  | N | 104911617 | 104914269 | 13 | 66.9  | 40.9 | 67.6 | 48.2 |
| chr17 | Fez2          | Intron4  | N | 78800239  | 78802079  | 9  | 53.9  | 23.4 | 56.9 | 37.6 |
| chr18 | Mro           | Intron4  | N | 74031719  | 74032877  | 6  | 40.3  | 6.7  | 43.8 | 24.6 |
| chr2  | Armc3         | Intron4  | N | 19160394  | 19165575  | 26 | 87.5  | 58.6 | 75.6 | 56.4 |
| chr9  | Acat1         | Intron4  | N | 53395672  | 53397282  | 8  | 40.4  | 13.3 | 71.1 | 51.9 |
| chr9  | Fxyd6         | Intron4  | N | 45198935  | 45199643  | 4  | 89.6  | 48.2 | 49.2 | 30.1 |
| chr15 | Tmbim6        | Intron4  | N | 99232601  | 99234844  | 11 | 59.1  | 41.6 | 44.8 | 25.8 |
| chr15 | Ccdc65        | Intron4  | N | 98549282  | 98551014  | 9  | 72.6  | 55.8 | 73.4 | 55.1 |
| chr5  | Sult1d1       | Intron4  | N | 87988913  | 87992894  | 18 | 90.9  | 43.0 | 76.8 | 59.0 |
| chr15 | Slc30a8       | Intron4  | N | 52153408  | 52157114  | 19 | 85.1  | 59.5 | 83.1 | 65.3 |
| chr7  | Izumo1        | Intron4  | N | 52879592  | 52880031  | 2  | 77.1  | 60.6 | 80.2 | 63.2 |
| chr13 | Elovl7        | Intron4  | N | 109060908 | 109061998 | 5  | 78.1  | 60.6 | 76.0 | 59.3 |
| chr8  | Slc35e1       | Intron4  | N | 75013489  | 75015740  | 9  | 62.7  | 43.0 | 65.9 | 49.3 |
| chr1  | B230209K01Rik | Intron4  | N | 123014043 | 123016434 | 12 | 75.6  | 49.6 | 70.2 | 53.6 |
| chr3  | Fndc7         | Intron4  | N | 108665906 | 108669979 | 20 | 62.9  | 42.5 | 74.5 | 58.0 |
| chr17 | Capn11        | Intron4  | N | 45769037  | 45769329  | 1  | 69.1  | 43.8 | 58.9 | 42.5 |
| chr5  | Fam184b       | Intron4  | N | 45925510  | 45928827  | 17 | 83.5  | 67.0 | 61.9 | 45.5 |
| chr16 | App           | Intron4  | N | 84971707  | 84978308  | 34 | 77.8  | 59.2 | 85.6 | 69.4 |
| chr4  | Dhdds         | Intron4  | N | 133547296 | 133548378 | 5  | 36.1  | 17.9 | 39.5 | 23.4 |
| chr11 | Otop2         | Intron4  | N | 115186019 | 115187734 | 9  | 77.0  | 56.8 | 67.1 | 51.1 |
| chr1  | Mrpl15        | Intron4  | N | 4774187   | 4775653   | 5  | 64.7  | 22.5 | 46.8 | 31.3 |
| chr5  | Msi1          | Intron4  | N | 115880898 | 115883860 | 14 | 58.1  | 36.5 | 54.4 | 38.9 |
| chr1  | Rgs16         | Intron4  | N | 155589260 | 155590763 | 8  | 78.7  | 54.1 | 74.5 | 59.0 |
| chr18 | Rell2         | Intron4  | N | 38116810  | 38117242  | 3  | 90.8  | 71.4 | 73.1 | 57.7 |
| chr6  | Trim24        | Intron4  | N | 37865298  | 37869373  | 19 | 100.0 | 75.2 | 95.1 | 80.0 |
| chr2  | Itgav         | Intron4  | N | 83596078  | 83602024  | 30 | 86.7  | 61.1 | 89.2 | 74.1 |
| chr5  | Fryl          | Intron40 | N | 73488809  | 73489397  | 3  | 87.4  | 49.4 | 83.2 | 46.5 |
| chr6  | Dnah6         | Intron41 | N | 73073888  | 73074608  | 4  | 20.5  | 1.1  | 62.6 | 40.9 |

|       |          |          |   |           |           |    |      |      |      |      |
|-------|----------|----------|---|-----------|-----------|----|------|------|------|------|
| chr7  | Muc5ac   | Intron42 | N | 149001513 | 149001852 | 2  | 55.0 | 4.2  | 47.5 | 2.6  |
| chr14 | Flnb     | Intron42 | N | 8771694   | 8774558   | 14 | 66.1 | 50.8 | 61.0 | 34.8 |
| chr5  | Zan      | Intron43 | N | 137860489 | 137861121 | 3  | 40.4 | 19.9 | 49.2 | 19.7 |
| chr2  | Lrp2     | Intron43 | N | 69326120  | 69327191  | 5  | 90.2 | 45.8 | 29.2 | 10.5 |
| chr1  | Fer1l5   | Intron43 | N | 36474381  | 36474568  | 1  | 76.4 | 59.1 | 81.1 | 62.9 |
| chr5  | Ptpn13   | Intron45 | N | 104020373 | 104022525 | 11 | 82.6 | 63.2 | 82.7 | 65.9 |
| chr7  | Nlrp6    | Intron5  | N | 148111108 | 148112313 | 6  | 83.2 | 30.4 | 86.2 | 33.1 |
| chr11 | Etaa1    | Intron5  | N | 17852707  | 17853565  | 2  | 45.0 | 0.0  | 50.0 | 0.0  |
| chr9  | lfrd2    | Intron5  | N | 107492994 | 107493126 | 1  | 64.1 | 42.9 | 74.4 | 27.2 |
| chr2  | Il1b     | Intron5  | N | 129195488 | 129196019 | 4  | 82.7 | 46.6 | 75.5 | 30.3 |
| chr17 | BC004004 | Intron5  | N | 29431107  | 29431219  | 1  | 31.6 | 0.0  | 42.6 | 0.0  |
| chr8  | Tlr3     | Intron5  | N | 46494090  | 46495149  | 7  | 61.9 | 8.3  | 53.8 | 17.7 |
| chr7  | Siglec5  | Intron5  | N | 50608040  | 50610345  | 12 | 38.9 | 4.4  | 40.6 | 4.8  |
| chr12 | Entpd5   | Intron5  | N | 85725271  | 85726097  | 4  | 50.1 | 9.8  | 45.9 | 10.3 |
| chr11 | Eme1     | Intron5  | N | 94509377  | 94509456  | 1  | 87.0 | 60.0 | 86.8 | 51.9 |
| chr4  | Zdhhc18  | Intron5  | N | 133169854 | 133171094 | 6  | 66.9 | 49.4 | 82.4 | 48.2 |
| chr3  | Slc25a24 | Intron5  | N | 108959924 | 108961415 | 7  | 32.6 | 0.7  | 34.5 | 2.1  |
| chr19 | Kdm2a    | Intron5  | N | 4325047   | 4326808   | 9  | 79.2 | 61.9 | 88.7 | 56.6 |
| chr10 | Hsf2     | Intron5  | N | 57219298  | 57221175  | 9  | 45.5 | 15.7 | 46.8 | 15.3 |
| chr7  | Ceacam1  | Intron5  | N | 26257093  | 26258816  | 9  | 41.7 | 22.0 | 51.1 | 20.0 |
| chr1  | Suco     | Intron5  | N | 163759472 | 163763546 | 19 | 84.9 | 57.7 | 90.6 | 60.0 |
| chr1  | Uck2     | Intron5  | N | 169166831 | 169167619 | 4  | 60.3 | 30.0 | 64.2 | 34.1 |
| chr13 | Tdp2     | Intron5  | N | 24930135  | 24932256  | 11 | 68.6 | 53.0 | 77.8 | 47.9 |
| chr4  | Gm12695  | Intron5  | N | 96415935  | 96420746  | 24 | 62.8 | 28.2 | 35.2 | 5.4  |
| chr9  | Exp5     | Intron5  | N | 53175318  | 53180347  | 25 | 56.0 | 31.8 | 51.3 | 22.8 |
| chr15 | Hnrnpa1  | Intron5  | N | 103072730 | 103072810 | 1  | 50.0 | 23.3 | 33.3 | 5.6  |
| chr9  | Chrn4    | Intron5  | N | 54891733  | 54896250  | 22 | 50.5 | 34.7 | 43.8 | 16.5 |
| chr4  | Hmgcl    | Intron5  | N | 135511651 | 135514637 | 15 | 39.4 | 13.4 | 55.4 | 28.3 |
| chr19 | Cep78    | Intron5  | N | 16043691  | 16045022  | 7  | 94.3 | 58.3 | 93.5 | 66.5 |
| chr7  | Ears2    | Intron5  | N | 129190247 | 129191615 | 7  | 70.1 | 40.0 | 86.4 | 59.5 |
| chr5  | Wbscr16  | Intron5  | N | 134639676 | 134641208 | 8  | 83.6 | 63.3 | 82.3 | 55.5 |
| chr8  | Slc25a42 | Intron5  | N | 72713988  | 72715759  | 9  | 64.5 | 20.4 | 50.6 | 23.9 |
| chr1  | Kmo      | Intron5  | N | 177573738 | 177577243 | 17 | 60.1 | 15.3 | 57.8 | 31.5 |
| chr14 | Diap3    | Intron5  | N | 87228964  | 87234783  | 26 | 79.5 | 53.4 | 90.1 | 64.5 |
| chr2  | Pigt     | Intron5  | N | 164326019 | 164326580 | 3  | 85.6 | 67.7 | 86.7 | 61.1 |
| chr7  | Il18bp   | Intron5  | N | 109165866 | 109166110 | 2  | 37.2 | 2.3  | 25.4 | 0.0  |
| chr10 | Agap2    | Intron5  | N | 126520635 | 126522168 | 8  | 69.6 | 17.6 | 48.1 | 22.8 |
| chr3  | Adh6a    | Intron5  | N | 137988283 | 137988879 | 3  | 88.7 | 71.2 | 92.5 | 68.8 |
| chr3  | Pdgfc    | Intron5  | N | 81013184  | 81016383  | 15 | 76.0 | 32.1 | 60.7 | 37.1 |
| chr13 | Rslcan18 | Intron5  | N | 67208990  | 67213123  | 17 | 76.2 | 52.2 | 66.3 | 42.9 |
| chr10 | Lss      | Intron5  | N | 75999111  | 76001096  | 10 | 57.4 | 36.3 | 60.4 | 36.9 |
| chr1  | Arcp2    | Intron5  | N | 74301589  | 74302531  | 5  | 70.7 | 42.7 | 80.4 | 57.1 |
| chr11 | Sln5     | Intron5  | N | 82774231  | 82774401  | 2  | 81.6 | 64.9 | 85.3 | 62.1 |
| chr6  | Camk1    | Intron5  | N | 113287300 | 113288104 | 4  | 97.9 | 58.4 | 76.0 | 52.9 |
| chr1  | Nuak2    | Intron5  | N | 134224774 | 134226534 | 9  | 64.1 | 36.6 | 53.7 | 30.8 |
| chr1  | Wdfy1    | Intron5  | N | 79710539  | 79711448  | 5  | 71.6 | 47.2 | 77.7 | 55.3 |
| chr1  | Cd247    | Intron5  | N | 167788610 | 167789349 | 4  | 88.9 | 58.9 | 69.8 | 47.6 |
| chr14 | Slc7a7   | Intron5  | N | 54994002  | 54994231  | 1  | 83.3 | 60.4 | 81.3 | 59.7 |
| chr12 | Syne3    | Intron5  | N | 106183421 | 106184775 | 7  | 74.7 | 25.8 | 72.6 | 51.4 |

|       |               |          |   |           |           |    |       |      |      |      |
|-------|---------------|----------|---|-----------|-----------|----|-------|------|------|------|
| chr10 | Sgk1          | Intron5  | N | 21715356  | 21715599  | 1  | 41.7  | 18.4 | 30.7 | 9.8  |
| chr10 | Gucd1         | Intron5  | N | 74974902  | 74979898  | 23 | 61.3  | 40.8 | 52.9 | 32.2 |
| chr10 | Ppap2c        | Intron5  | N | 78993774  | 78996368  | 10 | 32.0  | 14.1 | 32.2 | 11.7 |
| chr7  | Fcgrt         | Intron5  | N | 52358042  | 52358372  | 2  | 66.4  | 41.3 | 55.8 | 35.3 |
| chr5  | Prkab1        | Intron5  | N | 116470477 | 116471491 | 5  | 86.4  | 60.0 | 84.6 | 64.1 |
| chr14 | Rpgrip1       | Intron5  | N | 52740248  | 52740667  | 2  | 61.9  | 41.2 | 57.3 | 37.3 |
| chr8  | Spg7          | Intron5  | N | 125600891 | 125601717 | 4  | 55.3  | 33.9 | 47.9 | 28.2 |
| chr6  | Chn2          | Intron5  | N | 54245916  | 54248038  | 11 | 100.0 | 27.7 | 88.5 | 68.8 |
| chr1  | Gdap1         | Intron5  | N | 17150120  | 17151207  | 5  | 71.4  | 46.5 | 77.1 | 57.4 |
| chr15 | Fam134b       | Intron5  | N | 25896473  | 25898161  | 8  | 92.6  | 48.7 | 69.6 | 50.0 |
| chr17 | Stub1         | Intron5  | N | 25968907  | 25968990  | 1  | 52.3  | 36.6 | 55.4 | 36.1 |
| chr12 | Alkbh1        | Intron5  | N | 88781365  | 88784591  | 15 | 49.5  | 30.2 | 42.1 | 23.4 |
| chr15 | Ugt3a1        | Intron5  | N | 9240464   | 9241503   | 5  | 86.6  | 64.9 | 80.1 | 61.5 |
| chr19 | Pdlim1        | Intron5  | N | 40324194  | 40326399  | 11 | 47.3  | 25.1 | 48.6 | 30.0 |
| chr10 | Ggt5          | Intron5  | N | 75067546  | 75068000  | 2  | 48.7  | 7.7  | 70.9 | 53.1 |
| chr11 | Pigl          | Intron5  | N | 62323354  | 62325639  | 11 | 81.5  | 46.4 | 67.4 | 49.6 |
| chr1  | Iqca          | Intron5  | N | 91963500  | 91967086  | 18 | 67.4  | 44.1 | 61.6 | 43.9 |
| chr3  | BC021767      | Intron5  | N | 94467742  | 94468897  | 6  | 72.3  | 52.0 | 71.8 | 54.5 |
| chr1  | Fhl2          | Intron5  | N | 43210100  | 43220546  | 50 | 71.9  | 43.7 | 65.0 | 47.9 |
| chr10 | Pmel          | Intron5  | N | 128152745 | 128152982 | 1  | 38.3  | 20.3 | 41.6 | 24.8 |
| chr8  | Nqo1          | Intron5  | N | 109916913 | 109926965 | 50 | 80.3  | 59.7 | 74.1 | 57.3 |
| chr9  | Mlh1          | Intron5  | N | 111135891 | 111138410 | 13 | 81.4  | 65.7 | 84.5 | 67.7 |
| chr17 | Rpl10a        | Intron5  | N | 28467643  | 28467774  | 1  | 40.9  | 21.7 | 40.3 | 23.7 |
| chr7  | Relb          | Intron5  | N | 20199235  | 20200907  | 8  | 67.0  | 41.0 | 69.8 | 53.2 |
| chr11 | Map3k14       | Intron5  | N | 103086937 | 103088300 | 7  | 86.7  | 50.7 | 83.4 | 66.9 |
| chr14 | 4930524C18Rik | Intron5  | N | 115256845 | 115260016 | 16 | 92.9  | 66.2 | 97.3 | 81.2 |
| chr2  | Rpl12         | Intron5  | N | 32819104  | 32819260  | 2  | 20.8  | 5.8  | 25.4 | 9.7  |
| chr16 | Comt          | Intron5  | N | 18424454  | 18426448  | 9  | 51.8  | 33.9 | 41.3 | 25.6 |
| chr8  | Fhod1         | Intron5  | N | 107854478 | 107855028 | 3  | 86.8  | 66.0 | 83.1 | 67.6 |
| chr10 | Sarnp         | Intron5  | N | 128283640 | 128285292 | 8  | 90.9  | 71.4 | 85.3 | 70.0 |
| chr14 | Dnah1         | Intron50 | N | 32108105  | 32108397  | 1  | 49.0  | 33.3 | 49.5 | 30.6 |
| chr14 | Stab1         | Intron53 | N | 31972506  | 31972682  | 1  | 65.2  | 40.0 | 84.0 | 46.0 |
| chr18 | Alpk2         | Intron6  | N | 65453770  | 65453865  | 1  | 74.7  | 12.0 | 76.8 | 10.5 |
| chr9  | Nr2e3         | Intron6  | N | 59796836  | 59796988  | 1  | 86.4  | 25.3 | 89.0 | 24.6 |
| chr8  | Plat          | Intron6  | N | 23883283  | 23884088  | 4  | 75.9  | 53.2 | 64.5 | 5.2  |
| chr7  | Slc22a18      | Intron6  | N | 150676830 | 150677650 | 4  | 75.9  | 2.9  | 64.6 | 8.8  |
| chr11 | Pnpo          | Intron6  | N | 96803849  | 96805044  | 4  | 83.3  | 18.8 | 81.0 | 29.9 |
| chr12 | Entpd5        | Intron6  | N | 85726160  | 85726746  | 3  | 83.6  | 36.8 | 87.2 | 37.2 |
| chr16 | Mina          | Intron6  | N | 59486462  | 59487253  | 4  | 70.9  | 19.4 | 63.6 | 13.8 |
| chr11 | BC096441      | Intron6  | N | 69498633  | 69500458  | 10 | 37.6  | 7.7  | 59.2 | 9.6  |
| chr12 | Prkar2b       | Intron6  | N | 32657069  | 32660783  | 19 | 43.3  | 24.9 | 50.2 | 5.9  |
| chr19 | Kdm2a         | Intron6  | N | 4326899   | 4328127   | 6  | 91.5  | 71.5 | 83.9 | 40.0 |
| chr7  | Ceacam1       | Intron6  | N | 26259072  | 26259538  | 2  | 18.9  | 0.0  | 51.6 | 7.7  |
| chr3  | 1700061117Rik | Intron6  | N | 116770744 | 116771889 | 6  | 40.6  | 22.1 | 51.5 | 14.1 |
| chr2  | Ttc16         | Intron6  | N | 32624504  | 32624617  | 1  | 55.6  | 8.7  | 52.8 | 17.0 |
| chr2  | Gm711         | Intron6  | N | 26798722  | 26799396  | 3  | 80.0  | 40.4 | 73.9 | 38.7 |
| chr10 | Mtrf1l        | Intron6  | N | 4532501   | 4533134   | 3  | 60.8  | 15.0 | 71.6 | 36.7 |
| chr5  | Hsd17b11      | Intron6  | N | 104447301 | 104450548 | 16 | 69.2  | 44.8 | 64.9 | 30.4 |
| chr15 | Krt83         | Intron6  | N | 101265108 | 101265911 | 4  | 93.1  | 45.4 | 84.3 | 50.2 |

|       |           |         |   |           |           |    |       |      |      |      |
|-------|-----------|---------|---|-----------|-----------|----|-------|------|------|------|
| chr6  | Pparg     | Intron6 | N | 115413304 | 115422878 | 47 | 75.6  | 46.3 | 74.3 | 41.3 |
| chr4  | Ugcg      | Intron6 | N | 59230087  | 59231366  | 6  | 86.4  | 66.5 | 91.5 | 60.8 |
| chr7  | Ppp5c     | Intron6 | N | 17592596  | 17593074  | 2  | 75.0  | 53.5 | 70.7 | 40.0 |
| chr6  | Clcn1     | Intron6 | N | 42243018  | 42244076  | 5  | 42.5  | 12.4 | 59.3 | 30.0 |
| chr2  | Ivd       | Intron6 | N | 118699041 | 118700400 | 7  | 62.8  | 32.9 | 70.7 | 41.9 |
| chr8  | Tcf25     | Intron6 | N | 125912548 | 125913564 | 5  | 94.1  | 40.5 | 87.0 | 58.5 |
| chr13 | Slc17a2   | Intron6 | N | 23909477  | 23910886  | 7  | 95.0  | 63.6 | 92.0 | 64.0 |
| chr7  | Arrdc4    | Intron6 | N | 75889816  | 75890030  | 1  | 59.2  | 37.1 | 65.1 | 37.3 |
| chr4  | Tnfrsf14  | Intron6 | N | 154300834 | 154301247 | 2  | 19.7  | 1.3  | 29.0 | 1.8  |
| chr7  | Vasp      | Intron6 | N | 19844817  | 19845929  | 6  | 76.5  | 50.7 | 47.1 | 20.8 |
| chr3  | Ccdc144b  | Intron6 | N | 35924364  | 35924830  | 2  | 70.3  | 45.8 | 80.7 | 54.5 |
| chr7  | Il18bp    | Intron6 | N | 109166179 | 109166623 | 3  | 64.2  | 35.5 | 54.5 | 29.6 |
| chr5  | Rassf6    | Intron6 | N | 91038019  | 91038740  | 4  | 37.6  | 12.8 | 32.2 | 7.4  |
| chr15 | Krt5      | Intron6 | N | 101541063 | 101541169 | 1  | 77.8  | 52.9 | 64.4 | 40.4 |
| chr13 | Tgfb1     | Intron6 | N | 56727542  | 56729274  | 9  | 89.4  | 63.9 | 78.3 | 54.4 |
| chr6  | Ogg1      | Intron6 | N | 113283675 | 113283835 | 2  | 47.6  | 22.4 | 51.5 | 28.4 |
| chr15 | Gsdmc4    | Intron6 | N | 63726515  | 63726711  | 1  | 82.8  | 36.7 | 73.0 | 50.8 |
| chr16 | Tnk2      | Intron6 | N | 32670317  | 32670877  | 3  | 55.8  | 40.4 | 53.0 | 30.9 |
| chr19 | Pyroxd2   | Intron6 | N | 42808646  | 42809912  | 6  | 87.2  | 58.9 | 64.1 | 42.1 |
| chr18 | Tmx3      | Intron6 | N | 90690430  | 90692921  | 10 | 62.2  | 39.2 | 66.4 | 44.4 |
| chr4  | Sdr16c5   | Intron6 | N | 3943586   | 3946595   | 16 | 64.8  | 49.1 | 55.4 | 33.6 |
| chr8  | Slc25a42  | Intron6 | N | 72715866  | 72718022  | 11 | 90.1  | 60.8 | 62.1 | 40.4 |
| chr8  | Slc18a1   | Intron6 | N | 71567903  | 71575178  | 36 | 76.7  | 61.2 | 57.9 | 36.4 |
| chr6  | Apobec1   | Intron6 | N | 122546796 | 122550075 | 17 | 80.4  | 55.7 | 83.9 | 62.7 |
| chr3  | Casq2     | Intron6 | N | 101930603 | 101931863 | 6  | 100.0 | 61.1 | 23.4 | 2.4  |
| chr13 | Ccnb1     | Intron6 | N | 101553603 | 101555411 | 9  | 72.3  | 45.7 | 65.9 | 45.5 |
| chr1  | Slco6c1   | Intron6 | N | 98972560  | 98977897  | 23 | 63.5  | 46.9 | 76.6 | 56.2 |
| chr7  | Deaf1     | Intron6 | N | 148507075 | 148507824 | 4  | 82.9  | 54.0 | 80.3 | 60.0 |
| chr2  | Mavs      | Intron6 | N | 131071406 | 131072099 | 3  | 87.8  | 58.7 | 91.7 | 71.6 |
| chr9  | Fbxo22    | Intron6 | N | 55068995  | 55071046  | 12 | 81.0  | 64.9 | 87.7 | 67.6 |
| chr10 | Tube1     | Intron6 | N | 38862183  | 38864180  | 10 | 82.9  | 67.6 | 84.0 | 64.0 |
| chr19 | Ms4a4d    | Intron6 | N | 11630784  | 11632366  | 8  | 93.1  | 66.7 | 75.0 | 55.0 |
| chr2  | Cpne1     | Intron6 | N | 155903426 | 155903510 | 1  | 83.7  | 57.6 | 68.8 | 49.1 |
| chr7  | Pop4      | Intron6 | N | 39053974  | 39056165  | 10 | 76.9  | 49.8 | 76.4 | 57.3 |
| chr19 | Fads3     | Intron6 | N | 10129157  | 10129596  | 2  | 67.9  | 52.3 | 52.7 | 34.1 |
| chr9  | Twf2      | Intron6 | N | 106115395 | 106116431 | 5  | 90.6  | 67.4 | 79.0 | 60.7 |
| chr13 | Serpinb6e | Intron6 | N | 33933225  | 33934575  | 7  | 76.9  | 50.0 | 94.4 | 76.2 |
| chr17 | Mlst8     | Intron6 | N | 24614971  | 24615055  | 1  | 44.9  | 20.0 | 39.2 | 21.2 |
| chr17 | Gpr110    | Intron6 | N | 43433789  | 43435953  | 11 | 87.4  | 67.6 | 90.1 | 72.5 |
| chr15 | Map3k12   | Intron6 | N | 102332614 | 102332745 | 1  | 57.1  | 15.0 | 40.0 | 22.5 |
| chr11 | Mpdu1     | Intron6 | N | 69472379  | 69475970  | 17 | 80.0  | 41.8 | 80.9 | 63.5 |
| chr2  | Tlk1      | Intron6 | N | 70560146  | 70562058  | 10 | 74.3  | 45.4 | 82.0 | 64.7 |
| chr9  | Gorasp1   | Intron6 | N | 119839425 | 119841738 | 12 | 88.4  | 44.8 | 67.7 | 50.5 |
| chr1  | Casq1     | Intron6 | N | 174145274 | 174145607 | 2  | 93.2  | 58.9 | 81.9 | 64.8 |
| chr2  | Optn      | Intron6 | N | 4954271   | 4955199   | 5  | 77.0  | 58.1 | 78.2 | 61.4 |
| chr2  | Tmco5b    | Intron6 | N | 113129961 | 113130932 | 5  | 80.0  | 45.8 | 56.3 | 40.0 |
| chr8  | Mmp2      | Intron6 | N | 95360042  | 95360804  | 4  | 93.4  | 59.7 | 92.3 | 76.2 |
| chr7  | Trim12c   | Intron6 | N | 111495259 | 111496441 | 6  | 76.6  | 59.3 | 79.6 | 63.7 |
| chr15 | Pde1b     | Intron6 | N | 103352593 | 103354738 | 11 | 66.0  | 41.4 | 65.7 | 49.8 |

|       |               |               |   |           |           |    |      |      |      |      |
|-------|---------------|---------------|---|-----------|-----------|----|------|------|------|------|
| chr2  | Frmd5         | Intron6       | N | 121383145 | 121383559 | 2  | 59.7 | 43.9 | 64.2 | 48.5 |
| chr11 | Git1          | Intron6       | N | 77314244  | 77314573  | 2  | 88.2 | 64.0 | 60.8 | 45.3 |
| chr9  | Rora          | Intron6       | N | 69219144  | 69220895  | 9  | 76.7 | 59.7 | 76.5 | 61.2 |
| chr1  |               | 2-Mar Intron6 | N | 186657908 | 186665132 | 35 | 69.7 | 53.4 | 68.2 | 52.9 |
| chr9  | Dapk2         | Intron6       | N | 66098193  | 66098881  | 3  | 58.6 | 30.4 | 75.3 | 60.1 |
| chr6  | Thumpd3       | Intron6       | N | 113013165 | 113015537 | 12 | 75.7 | 45.5 | 68.2 | 53.2 |
| chr17 | Col11a2       | Intron62      | N | 34201789  | 34201950  | 1  | 46.7 | 26.6 | 48.8 | 23.5 |
| chr7  | Ryr1          | Intron65      | N | 29861284  | 29861819  | 3  | 63.3 | 38.1 | 71.4 | 28.0 |
| chr5  | Fras1         | Intron66      | N | 97197511  | 97198524  | 5  | 72.2 | 49.8 | 53.6 | 3.2  |
| chr5  | Htt           | Intron66      | N | 35250243  | 35251280  | 5  | 61.0 | 37.5 | 58.8 | 33.8 |
| chr11 | Tsr1          | Intron7       | N | 74715669  | 74717321  | 7  | 63.5 | 25.3 | 65.4 | 16.8 |
| chr10 | Tmprss9       | Intron7       | N | 80350301  | 80351030  | 3  | 23.8 | 0.0  | 49.1 | 1.5  |
| chr2  | Entpd8        | Intron7       | N | 24939609  | 24939780  | 1  | 78.8 | 31.0 | 67.1 | 20.3 |
| chr11 | Polg2         | Intron7       | N | 106638876 | 106640272 | 6  | 33.1 | 2.1  | 80.1 | 35.4 |
| chr5  | Gm17660       | Intron7       | N | 104503793 | 104503879 | 1  | 66.8 | 27.2 | 80.4 | 35.9 |
| chr17 | Fkbp5         | Intron7       | N | 28565412  | 28566165  | 4  | 70.3 | 39.3 | 65.2 | 22.5 |
| chr17 | Ubash3a       | Intron7       | N | 31365176  | 31368356  | 15 | 54.8 | 33.9 | 75.0 | 34.1 |
| chr1  | Idh1          | Intron7       | N | 65217825  | 65221804  | 20 | 81.0 | 46.9 | 90.5 | 51.4 |
| chr9  | Nr2e3         | Intron7       | N | 59797116  | 59797594  | 2  | 63.3 | 23.1 | 61.0 | 24.8 |
| chr7  | Uevld         | Intron7       | N | 54200720  | 54203282  | 13 | 91.7 | 56.9 | 88.0 | 52.6 |
| chr4  | Gale          | Intron7       | N | 135523172 | 135523266 | 1  | 84.2 | 67.5 | 89.8 | 56.1 |
| chr11 | Arhgap27      | Intron7       | N | 103195678 | 103196514 | 3  | 40.9 | 25.6 | 45.5 | 12.4 |
| chr11 | Mettl16       | Intron7       | N | 74617403  | 74618754  | 7  | 94.3 | 70.4 | 79.9 | 47.0 |
| chr12 | Snx6          | Intron7       | N | 55864713  | 55866570  | 9  | 78.3 | 47.9 | 80.8 | 48.8 |
| chr6  | Phb2          | Intron7       | N | 124665678 | 124665971 | 1  | 52.5 | 35.7 | 56.1 | 25.0 |
| chr9  | Kdelc2        | Intron7       | N | 53206130  | 53207791  | 8  | 82.2 | 61.9 | 81.8 | 51.0 |
| chr1  | Usf1          | Intron7       | N | 173347461 | 173347603 | 1  | 82.0 | 56.9 | 76.5 | 45.9 |
| chr4  | Akr1a1        | Intron7       | N | 116314583 | 116318108 | 18 | 88.7 | 65.4 | 82.2 | 52.4 |
| chr17 | Gm9992        | Intron7       | N | 7581467   | 7583552   | 10 | 62.9 | 42.4 | 73.0 | 43.2 |
| chr10 | Dazap1        | Intron7       | N | 79743757  | 79745768  | 10 | 51.5 | 9.8  | 41.7 | 12.1 |
| chr3  | Cth           | Intron7       | N | 157573905 | 157576563 | 13 | 60.3 | 27.3 | 63.5 | 35.3 |
| chr4  | Trit1         | Intron7       | N | 122726508 | 122726719 | 1  | 82.7 | 52.7 | 80.9 | 53.7 |
| chr15 | Twf1          | Intron7       | N | 94416968  | 94418658  | 7  | 92.5 | 70.8 | 94.2 | 67.3 |
| chr5  | Csn2          | Intron7       | N | 88126306  | 88127052  | 3  | 91.7 | 50.0 | 95.0 | 70.0 |
| chr19 | Gif           | Intron7       | N | 11833630  | 11834789  | 6  | 75.3 | 52.0 | 74.3 | 50.0 |
| chr19 | Cyp2c69       | Intron7       | N | 39955733  | 39955935  | 1  | 83.3 | 58.8 | 70.4 | 46.2 |
| chr6  | Fkbp4         | Intron7       | N | 128384891 | 128385731 | 4  | 81.9 | 47.6 | 82.9 | 59.1 |
| chr17 | Btnl2         | Intron7       | N | 34502407  | 34503328  | 5  | 69.2 | 47.6 | 69.6 | 45.9 |
| chr11 | 4933422H20Rik | Intron7       | N | 115308135 | 115308977 | 5  | 41.8 | 12.5 | 26.8 | 5.3  |
| chr7  | Arfip2        | Intron7       | N | 112787980 | 112788758 | 3  | 30.2 | 0.0  | 37.9 | 16.7 |
| chr10 | D10Bwg1379e   | Intron7       | N | 18320417  | 18323212  | 14 | 34.4 | 13.2 | 66.0 | 45.4 |
| chr13 | Mterfd1       | Intron7       | N | 67031160  | 67033870  | 12 | 90.1 | 61.9 | 91.2 | 70.8 |
| chr5  | Srpk2         | Intron7       | N | 23031564  | 23032607  | 5  | 92.2 | 37.5 | 77.5 | 57.1 |
| chr5  | Sult1d1       | Intron7       | N | 87995218  | 87997821  | 13 | 60.6 | 25.0 | 41.0 | 20.7 |
| chr2  | Sephs1        | Intron7       | N | 4820610   | 4826517   | 29 | 71.3 | 48.5 | 83.7 | 63.8 |
| chr2  | Mtg2          | Intron7       | N | 179818166 | 179818768 | 3  | 95.7 | 79.2 | 82.0 | 62.7 |
| chr6  | Clcn1         | Intron7       | N | 42244156  | 42248797  | 23 | 64.4 | 49.2 | 61.5 | 42.3 |
| chr2  | Ehf           | Intron7       | N | 103119921 | 103123677 | 19 | 29.0 | 9.8  | 27.8 | 9.1  |
| chr17 | Mlst8         | Intron7       | N | 24615108  | 24615264  | 2  | 39.1 | 15.1 | 32.1 | 13.7 |

|       |               |          |   |           |           |    |       |      |       |      |
|-------|---------------|----------|---|-----------|-----------|----|-------|------|-------|------|
| chr5  | Hnrnpd        | Intron7  | N | 100396407 | 100405552 | 45 | 74.5  | 46.8 | 43.6  | 25.4 |
| chr10 | Adamtsl5      | Intron7  | N | 79806472  | 79807577  | 6  | 43.1  | 22.8 | 39.8  | 22.0 |
| chr2  | Abtb2         | Intron7  | N | 103545890 | 103547733 | 9  | 74.9  | 57.8 | 56.0  | 38.2 |
| chr13 | Cdk7          | Intron7  | N | 101487638 | 101489256 | 7  | 79.8  | 29.3 | 53.7  | 37.6 |
| chr5  | Klhl5         | Intron7  | N | 65550248  | 65552280  | 10 | 79.6  | 63.6 | 80.4  | 64.5 |
| chr15 | Slc22a22      | Intron7  | N | 57086811  | 57088029  | 6  | 96.8  | 81.4 | 87.7  | 71.8 |
| chr5  | Lrrc43        | Intron7  | N | 123951340 | 123953184 | 9  | 79.1  | 50.7 | 71.8  | 56.0 |
| chr9  | 4931406C07Rik | Intron7  | N | 15102386  | 15105810  | 16 | 82.0  | 56.3 | 50.7  | 34.9 |
| chr17 | Crisp2        | Intron7  | N | 40927614  | 40928825  | 6  | 91.3  | 68.7 | 96.2  | 80.4 |
| chr3  | Tdo2          | Intron7  | N | 81772194  | 81773411  | 5  | 89.7  | 69.0 | 95.0  | 80.0 |
| chr12 | Syne2         | Intron70 | N | 77125145  | 77126543  | 7  | 86.8  | 66.5 | 86.1  | 71.1 |
| chr7  | Ryr1          | Intron76 | N | 29875247  | 29875938  | 3  | 82.0  | 50.0 | 85.4  | 58.1 |
| chr5  | Tmem175       | Intron8  | N | 109072223 | 109073186 | 5  | 95.7  | 31.8 | 96.6  | 9.1  |
| chr1  | Tnnt2         | Intron8  | N | 137744350 | 137744557 | 1  | 75.3  | 43.8 | 78.2  | 25.0 |
| chr1  | Hibch         | Intron8  | N | 52958178  | 52959690  | 8  | 62.8  | 16.7 | 75.8  | 23.7 |
| chr2  | Anapc2        | Intron8  | N | 25134834  | 25135646  | 4  | 72.6  | 40.6 | 92.9  | 42.6 |
| chr13 | Pik3r1        | Intron8  | N | 102459453 | 102460435 | 5  | 77.2  | 41.2 | 82.9  | 33.9 |
| chr9  | Fbxl2         | Intron8  | N | 113898555 | 113899735 | 6  | 82.6  | 64.1 | 72.1  | 24.6 |
| chr2  | Slc1a2        | Intron8  | N | 102601367 | 102607089 | 29 | 69.8  | 30.9 | 76.6  | 32.6 |
| chr1  | Als2          | Intron8  | N | 59230158  | 59231767  | 8  | 97.4  | 54.0 | 90.5  | 47.1 |
| chr17 | BC051142      | Intron8  | N | 34580404  | 34580982  | 3  | 81.0  | 53.1 | 93.5  | 51.4 |
| chr1  | Tnni1         | Intron8  | N | 137706313 | 137707189 | 5  | 50.6  | 9.5  | 48.7  | 7.8  |
| chr11 | Wipi1         | Intron8  | N | 109445482 | 109446408 | 5  | 67.7  | 10.0 | 76.4  | 37.7 |
| chr11 | Luc7l3        | Intron8  | N | 94165301  | 94167499  | 11 | 44.4  | 12.1 | 57.8  | 21.2 |
| chr16 | Nfkbiz        | Intron8  | N | 55818648  | 55818860  | 1  | 90.8  | 68.9 | 86.6  | 51.9 |
| chr14 | Gmpr2         | Intron8  | N | 56296086  | 56296707  | 3  | 71.4  | 37.9 | 68.7  | 35.4 |
| chr7  | Stim1         | Intron8  | N | 109574655 | 109575213 | 3  | 41.7  | 10.2 | 43.1  | 10.1 |
| chr5  | Bst1          | Intron8  | N | 44231730  | 44233235  | 8  | 60.6  | 35.0 | 48.9  | 15.8 |
| chr5  | Nsun5         | Intron8  | N | 135851356 | 135851424 | 2  | 76.7  | 40.4 | 80.3  | 47.4 |
| chr2  | Stam          | Intron8  | N | 14052746  | 14055979  | 16 | 32.3  | 1.3  | 36.7  | 4.6  |
| chr4  | Trit1         | Intron8  | N | 122726798 | 122729308 | 13 | 40.1  | 14.1 | 44.7  | 13.3 |
| chr2  | Meis2         | Intron8  | N | 115885301 | 115886416 | 4  | 37.5  | 20.8 | 42.3  | 12.0 |
| chr1  | Lamb3         | Intron8  | N | 195152268 | 195154087 | 9  | 76.0  | 46.7 | 57.9  | 30.1 |
| chr5  | Kdm2b         | Intron8  | N | 123332234 | 123332410 | 1  | 91.2  | 44.4 | 73.8  | 46.2 |
| chr11 | Tmem106a      | Intron8  | N | 101451303 | 101451646 | 2  | 45.3  | 13.7 | 39.7  | 13.1 |
| chr11 | Nf1           | Intron8  | N | 79223054  | 79224997  | 9  | 93.8  | 73.8 | 100.0 | 74.3 |
| chr8  | Tecr          | Intron8  | N | 86097043  | 86097118  | 1  | 73.1  | 42.3 | 74.6  | 50.0 |
| chr12 | Actr10        | Intron8  | N | 72055642  | 72057259  | 8  | 84.0  | 66.9 | 82.4  | 58.4 |
| chr4  | Wdr31         | Intron8  | N | 62124511  | 62124960  | 2  | 91.7  | 34.3 | 54.7  | 30.8 |
| chr9  | Trcg1         | Intron8  | N | 57094563  | 57095691  | 6  | 32.1  | 5.1  | 52.2  | 28.4 |
| chr7  | Snrnp70       | Intron8  | N | 52647696  | 52650028  | 12 | 40.3  | 19.9 | 45.5  | 21.7 |
| chr17 | Btnl5         | Intron8  | N | 34632961  | 34634007  | 5  | 69.9  | 18.2 | 59.7  | 36.3 |
| chr9  | Amica1        | Intron8  | N | 44909229  | 44911117  | 9  | 30.5  | 5.1  | 37.2  | 14.5 |
| chr17 | Chaf1a        | Intron8  | N | 56201735  | 56201973  | 1  | 85.7  | 61.5 | 83.3  | 60.7 |
| chr13 | Tgfb1         | Intron8  | N | 56731192  | 56731904  | 4  | 73.2  | 28.1 | 54.8  | 32.7 |
| chr3  | Psm4          | Intron8  | N | 94839847  | 94840526  | 3  | 100.0 | 83.3 | 94.5  | 72.4 |
| chr11 | Mpp2          | Intron8  | N | 101924730 | 101925607 | 4  | 55.1  | 23.3 | 74.9  | 53.3 |
| chr13 | Hexb          | Intron8  | N | 97953762  | 97955522  | 9  | 63.7  | 48.1 | 53.3  | 31.7 |
| chr3  | Ccdc144b      | Intron8  | N | 35931868  | 35934197  | 12 | 79.2  | 60.9 | 81.3  | 60.2 |



|       |               |          |   |           |           |    |       |      |      |      |
|-------|---------------|----------|---|-----------|-----------|----|-------|------|------|------|
| chr6  | Phb2          | Intron8  | N | 124666053 | 124666621 | 3  | 77.6  | 32.0 | 60.5 | 40.1 |
| chr10 | Tmem194       | Intron8  | N | 127132599 | 127133283 | 5  | 76.4  | 58.2 | 76.6 | 56.5 |
| chr16 | Jam2          | Intron8  | N | 84819021  | 84821504  | 12 | 77.0  | 59.1 | 77.0 | 57.1 |
| chr9  | Pcsk7         | Intron8  | N | 45723310  | 45724070  | 4  | 91.8  | 72.2 | 88.3 | 69.4 |
| chr6  | Mcm2          | Intron8  | N | 88838260  | 88839007  | 4  | 79.2  | 56.4 | 67.7 | 49.1 |
| chr7  | Otoa          | Intron8  | N | 128246249 | 128249385 | 16 | 84.0  | 36.5 | 85.8 | 67.6 |
| chr10 | Sgk1          | Intron8  | N | 21716161  | 21716364  | 1  | 93.6  | 51.1 | 87.5 | 69.4 |
| chr17 | Decr2         | Intron8  | N | 26225943  | 26226908  | 4  | 74.9  | 51.9 | 65.3 | 47.7 |
| chr2  | Lrp2          | Intron8  | N | 69271150  | 69273059  | 10 | 90.2  | 51.7 | 64.3 | 47.3 |
| chr4  | Tle1          | Intron8  | N | 71799723  | 71800722  | 5  | 84.9  | 48.8 | 85.1 | 68.1 |
| chr1  | Smarcal1      | Intron8  | N | 72645504  | 72647942  | 12 | 74.6  | 56.5 | 78.6 | 62.2 |
| chr17 | Rasgrp3       | Intron8  | N | 75900097  | 75902453  | 10 | 70.8  | 51.0 | 63.0 | 46.7 |
| chr9  | Neo1          | Intron8  | N | 58747041  | 58749889  | 13 | 68.8  | 51.1 | 68.6 | 52.9 |
| chr7  | Oat           | Intron8  | N | 139758974 | 139761588 | 12 | 91.8  | 70.6 | 94.1 | 78.4 |
| chr11 | Obscn         | Intron83 | N | 58894466  | 58895296  | 4  | 96.2  | 76.7 | 89.4 | 67.2 |
| chr7  | Ryr1          | Intron86 | N | 29885504  | 29886752  | 6  | 100.0 | 27.9 | 81.2 | 60.3 |
| chr10 | Lrp1          | Intron87 | N | 127047537 | 127049712 | 11 | 59.9  | 39.2 | 65.1 | 35.9 |
| chr4  | Eif3i         | Intron9  | N | 129276287 | 129277652 | 5  | 85.0  | 41.8 | 95.7 | 43.5 |
| chr3  | Fstl5         | Intron9  | N | 76393031  | 76397364  | 20 | 82.9  | 41.6 | 91.9 | 44.9 |
| chr10 | Cpsf6         | Intron9  | N | 116805045 | 116813894 | 34 | 44.0  | 8.4  | 49.7 | 3.6  |
| chr1  | Tnnt2         | Intron9  | N | 137744675 | 137745387 | 4  | 82.3  | 66.3 | 83.6 | 38.3 |
| chr2  | Fnbp4         | Intron9  | N | 90603703  | 90605986  | 11 | 68.7  | 51.4 | 80.8 | 35.7 |
| chr3  | Fhdc1         | Intron9  | N | 84268297  | 84269343  | 5  | 90.5  | 46.7 | 90.0 | 46.7 |
| chr12 | Evl           | Intron9  | N | 109919765 | 109921404 | 8  | 88.8  | 51.8 | 92.5 | 53.3 |
| chr15 | Vdr           | Intron9  | N | 97718920  | 97738665  | 97 | 73.2  | 37.5 | 71.5 | 34.1 |
| chr5  | Kdm2b         | Intron9  | N | 123332498 | 123333327 | 4  | 79.8  | 13.0 | 78.2 | 42.4 |
| chr14 | Ncoa4         | Intron9  | N | 32990560  | 32991008  | 2  | 63.0  | 42.1 | 62.5 | 27.1 |
| chr4  | Bai2          | Intron9  | N | 129685674 | 129686454 | 4  | 41.5  | 13.5 | 45.8 | 11.9 |
| chr1  | Dars          | Intron9  | N | 130275455 | 130283693 | 41 | 79.2  | 46.1 | 78.1 | 46.9 |
| chr9  | Amica1        | Intron9  | N | 44911179  | 44912272  | 5  | 28.6  | 2.7  | 34.6 | 3.7  |
| chr2  | Serinc3       | Intron9  | N | 163465064 | 163470733 | 26 | 68.6  | 36.6 | 73.5 | 43.0 |
| chr17 | Mocs1         | Intron9  | N | 49591657  | 49592119  | 2  | 27.6  | 8.5  | 44.9 | 15.4 |
| chr10 | Mknk2         | Intron9  | N | 80132721  | 80134303  | 8  | 91.7  | 61.3 | 90.3 | 61.2 |
| chr11 | Ccdc104       | Intron9  | N | 29145151  | 29147014  | 8  | 46.0  | 27.9 | 31.5 | 2.9  |
| chr5  | Acads         | Intron9  | N | 115567738 | 115569233 | 6  | 89.3  | 57.7 | 88.9 | 61.0 |
| chr16 | Eif4a2        | Intron9  | N | 23111666  | 23111889  | 2  | 48.6  | 31.6 | 54.5 | 27.7 |
| chr4  | Trit1         | Intron9  | N | 122729419 | 122729726 | 2  | 60.0  | 30.8 | 46.7 | 20.0 |
| chr19 | Entpd1        | Intron9  | N | 40811375  | 40813312  | 10 | 36.9  | 15.0 | 42.8 | 17.6 |
| chr7  | Ech1          | Intron9  | N | 29616887  | 29617022  | 1  | 33.9  | 3.0  | 33.2 | 8.1  |
| chr7  | D430042O09Rik | Intron9  | N | 132956464 | 132957106 | 3  | 84.5  | 61.9 | 88.6 | 64.3 |
| chr7  | Oat           | Intron9  | N | 139761824 | 139767977 | 27 | 75.7  | 25.2 | 58.3 | 34.6 |
| chr11 | Gfpt2         | Intron9  | N | 49632757  | 49636713  | 20 | 87.5  | 72.1 | 74.2 | 51.2 |
| chr4  | Sepn1         | Intron9  | N | 134101606 | 134103865 | 11 | 58.7  | 29.0 | 61.0 | 39.4 |
| chr5  | Sec31a        | Intron9  | N | 100808021 | 100810178 | 11 | 62.5  | 34.2 | 48.6 | 27.3 |
| chr9  | Impdh2        | Intron9  | N | 108466023 | 108466965 | 5  | 70.9  | 55.4 | 80.3 | 59.0 |
| chr18 | Nars          | Intron9  | N | 64668970  | 64670106  | 6  | 85.6  | 66.7 | 89.1 | 68.1 |
| chr18 | Oacyl         | Intron9  | N | 65897659  | 65899729  | 10 | 82.0  | 54.4 | 78.3 | 58.6 |
| chr1  | Usf1          | Intron9  | N | 173347996 | 173348162 | 1  | 82.4  | 44.9 | 82.0 | 62.5 |
| chr8  | Vps4a         | Intron9  | N | 109567032 | 109568354 | 7  | 85.0  | 47.0 | 67.3 | 48.2 |

|       |          |          |   |           |           |    |       |      |      |      |
|-------|----------|----------|---|-----------|-----------|----|-------|------|------|------|
| chr8  | Smarca5  | Intron9  | N | 83234576  | 83235555  | 5  | 70.8  | 36.9 | 92.9 | 74.0 |
| chr2  | Man1b1   | Intron9  | N | 25203747  | 25204090  | 2  | 78.7  | 57.2 | 81.1 | 62.8 |
| chr1  | Cflar    | Intron9  | N | 58809691  | 58810627  | 5  | 100.0 | 69.2 | 83.9 | 65.9 |
| chr8  | Rfx1     | Intron9  | N | 86611972  | 86614009  | 10 | 77.2  | 58.2 | 68.8 | 50.9 |
| chr6  | Slco1a5  | Intron9  | N | 142202988 | 142207497 | 21 | 89.5  | 68.8 | 82.0 | 64.2 |
| chr7  | Kat8     | Intron9  | N | 135068461 | 135068622 | 1  | 64.1  | 48.4 | 56.5 | 39.0 |
| chr2  | Tmc2     | Intron9  | N | 130058147 | 130060513 | 12 | 74.9  | 58.0 | 79.1 | 61.9 |
| chr6  | Rasgef1a | Intron9  | N | 118037305 | 118038126 | 4  | 93.0  | 76.7 | 84.6 | 67.5 |
| chr11 | Ncor1    | Intron9  | N | 62144427  | 62147164  | 14 | 91.8  | 75.3 | 94.4 | 77.8 |
| chr9  | Ubl7     | Intron9  | N | 57770426  | 57770961  | 3  | 96.2  | 70.0 | 94.6 | 79.3 |
| chr5  | Sel1l3   | LastExon | N | 53498322  | 53499413  | 6  | 80.0  | 22.9 | 78.6 | 24.1 |
| chr5  | Khk      | LastExon | N | 31233335  | 31233619  | 2  | 61.9  | 27.3 | 67.9 | 17.5 |
| chr15 | Krt8     | LastExon | N | 101827142 | 101827564 | 2  | 39.4  | 19.4 | 65.7 | 15.5 |
| chr17 | Fsd1     | LastExon | N | 56136065  | 56136304  | 3  | 88.9  | 45.8 | 89.7 | 40.6 |
| chr2  | Il1a     | LastExon | N | 129125346 | 129126635 | 7  | 64.1  | 8.1  | 54.1 | 5.6  |
| chr1  | Cnot11   | LastExon | N | 39601914  | 39603722  | 9  | 92.0  | 46.0 | 70.2 | 22.4 |
| chr17 | Wdr90    | LastExon | N | 25981679  | 25982170  | 3  | 55.1  | 17.2 | 66.3 | 18.7 |
| chr11 | Sstr2    | LastExon | N | 113486903 | 113486950 | 1  | 72.6  | 50.5 | 74.3 | 29.4 |
| chr8  | Cul4a    | LastExon | N | 13146532  | 13147939  | 7  | 65.5  | 28.7 | 65.9 | 21.3 |
| chr12 | Gpx2     | LastExon | N | 77893322  | 77893987  | 4  | 83.7  | 47.8 | 85.6 | 43.9 |
| chr10 | Socs2    | LastExon | N | 94874124  | 94875744  | 8  | 74.0  | 29.0 | 63.8 | 22.7 |
| chr4  | Al464131 | LastExon | N | 41442634  | 41446723  | 10 | 88.3  | 46.5 | 89.0 | 48.6 |
| chr2  | Trib3    | LastExon | N | 152163161 | 152164423 | 6  | 51.7  | 15.4 | 58.9 | 18.6 |
| chr2  | Fap      | LastExon | N | 62338993  | 62339345  | 2  | 74.6  | 31.6 | 69.5 | 32.1 |
| chr7  | Siglec5  | LastExon | N | 50613953  | 50614840  | 4  | 80.3  | 34.9 | 82.2 | 45.1 |
| chr14 | Fam160b2 | LastExon | N | 70983102  | 70984990  | 9  | 86.4  | 36.5 | 84.5 | 48.3 |
| chr2  | Ada      | LastExon | N | 163552307 | 163552784 | 3  | 41.7  | 2.6  | 38.5 | 2.7  |
| chr15 | Mei1     | LastExon | N | 81957044  | 81957244  | 2  | 67.8  | 52.3 | 79.7 | 44.2 |
| chr7  | Slx1b    | LastExon | N | 133832441 | 133835169 | 14 | 83.5  | 63.2 | 86.8 | 52.1 |
| chr9  | Cxcr5    | LastExon | N | 44319870  | 44322384  | 9  | 81.7  | 57.5 | 81.8 | 48.9 |
| chr8  | Slc18a1  | LastExon | N | 71561607  | 71562804  | 6  | 35.0  | 14.1 | 57.4 | 24.8 |
| chr3  | Tifa     | LastExon | N | 127499487 | 127501307 | 10 | 71.5  | 29.9 | 76.8 | 44.2 |
| chr1  | Tnni1    | LastExon | N | 137707190 | 137707566 | 2  | 43.5  | 21.2 | 59.9 | 27.3 |
| chr17 | Ntn3     | LastExon | N | 24340791  | 24343892  | 5  | 53.7  | 34.0 | 60.9 | 28.6 |
| chr11 | Rasd1    | LastExon | N | 59776685  | 59777868  | 2  | 68.9  | 36.1 | 59.9 | 27.6 |
| chr3  | Impa1    | LastExon | N | 10313540  | 10315301  | 9  | 82.9  | 0.7  | 76.6 | 44.8 |
| chr9  | Oxsr1    | LastExon | N | 119147551 | 119150334 | 14 | 67.1  | 34.2 | 77.9 | 46.5 |
| chr14 | Mmrn2    | LastExon | N | 35216099  | 35217472  | 7  | 82.2  | 56.5 | 80.4 | 49.1 |
| chr12 | Arl4a    | LastExon | N | 40759878  | 40763420  | 16 | 34.5  | 6.9  | 31.0 | 0.3  |
| chr4  | Tspan1   | LastExon | N | 115834486 | 115835640 | 7  | 77.4  | 30.2 | 76.2 | 45.6 |
| chr17 | Tbl3     | LastExon | N | 24837598  | 24837730  | 1  | 76.8  | 55.8 | 72.3 | 42.5 |
| chr7  | Pwwp2b   | LastExon | N | 146452371 | 146453152 | 4  | 41.1  | 22.1 | 57.5 | 27.9 |
| chr11 | Hoxb4    | LastExon | N | 96181344  | 96182952  | 4  | 44.7  | 28.0 | 68.1 | 38.9 |
| chr16 | Klhl6    | LastExon | N | 19946586  | 19947386  | 4  | 80.6  | 38.6 | 75.8 | 46.7 |
| chr18 | Atg12    | LastExon | N | 46892071  | 46894163  | 11 | 49.7  | 34.1 | 58.8 | 29.9 |
| chr17 | Wdr46    | LastExon | N | 34086223  | 34086640  | 3  | 39.8  | 12.9 | 40.0 | 11.3 |
| chr2  | Nsfl1c   | LastExon | N | 151336643 | 151337040 | 2  | 87.0  | 57.1 | 70.6 | 42.0 |
| chr9  | Rasgrf1  | LastExon | N | 89921509  | 89921817  | 2  | 61.4  | 46.0 | 74.2 | 45.6 |
| chr17 | Gpank1   | LastExon | N | 35261165  | 35261760  | 3  | 36.6  | 2.2  | 47.6 | 19.7 |

|       |               |          |   |           |           |    |       |      |      |      |
|-------|---------------|----------|---|-----------|-----------|----|-------|------|------|------|
| chr17 | Fam195a       | LastExon | N | 26000643  | 26000984  | 2  | 70.4  | 45.9 | 67.8 | 40.0 |
| chr4  | Hcrr1         | LastExon | N | 129807461 | 129808248 | 4  | 47.9  | 15.0 | 45.2 | 17.9 |
| chr14 | Prkcd         | LastExon | N | 31408540  | 31409211  | 4  | 91.9  | 64.0 | 89.7 | 62.4 |
| chr11 | Eif1          | LastExon | N | 100182631 | 100183410 | 5  | 42.5  | 4.1  | 36.4 | 9.2  |
| chr3  | Trim46        | LastExon | N | 89038099  | 89039214  | 6  | 65.9  | 48.3 | 69.1 | 42.0 |
| chr2  | Entpd6        | LastExon | N | 150596365 | 150597410 | 6  | 19.3  | 1.8  | 34.0 | 6.9  |
| chr1  | Pm20d1        | LastExon | N | 133712564 | 133714692 | 11 | 78.6  | 53.8 | 83.6 | 56.6 |
| chr8  | Pbx4          | LastExon | N | 72395894  | 72396191  | 2  | 91.5  | 70.5 | 82.1 | 55.4 |
| chr11 | Sap30bp       | LastExon | N | 115825525 | 115826848 | 7  | 67.3  | 30.0 | 61.8 | 35.2 |
| chr7  | Ppfibp2       | LastExon | N | 114891061 | 114892097 | 6  | 81.3  | 55.2 | 75.4 | 49.0 |
| chr14 | Lrrc18        | LastExon | N | 33827011  | 33828478  | 7  | 58.2  | 41.2 | 62.6 | 36.3 |
| chr15 | Myc           | LastExon | N | 61820901  | 61821916  | 3  | 83.4  | 48.4 | 84.1 | 58.3 |
| chr1  | Lefty2        | LastExon | N | 182827581 | 182829233 | 8  | 68.9  | 51.3 | 71.2 | 45.4 |
| chr6  | Usp5          | LastExon | N | 124765037 | 124765677 | 4  | 34.1  | 1.9  | 41.2 | 16.2 |
| chr12 | Cfl2          | LastExon | N | 55959806  | 55962224  | 13 | 70.5  | 54.9 | 82.7 | 57.8 |
| chr9  | Rplp1         | LastExon | N | 61761090  | 61761328  | 2  | 46.6  | 29.3 | 45.7 | 21.0 |
| chr11 | 4933402P03Rik | LastExon | N | 69630068  | 69631443  | 8  | 69.8  | 45.4 | 79.2 | 54.5 |
| chr13 | Dmgdh         | LastExon | N | 94522175  | 94522778  | 3  | 23.1  | 2.4  | 60.7 | 36.1 |
| chr17 | Ehmt2         | LastExon | N | 35050585  | 35050992  | 3  | 60.7  | 9.5  | 70.2 | 45.7 |
| chr4  | Slc44a1       | LastExon | N | 53634467  | 53635350  | 5  | 89.8  | 33.5 | 65.5 | 41.1 |
| chr6  | Gadd45a       | LastExon | N | 66985090  | 66985766  | 4  | 35.1  | 6.0  | 33.9 | 9.6  |
| chr4  | Mpl           | LastExon | N | 118115022 | 118116285 | 6  | 68.9  | 39.5 | 73.4 | 49.0 |
| chr4  | Aldh1b1       | LastExon | N | 45815327  | 45817480  | 12 | 90.5  | 53.0 | 88.8 | 64.8 |
| chr9  | Msl2          | LastExon | N | 101002901 | 101007129 | 21 | 85.0  | 56.0 | 83.3 | 59.5 |
| chr7  | Dnajb13       | LastExon | N | 107651529 | 107651819 | 2  | 82.5  | 59.1 | 91.2 | 67.6 |
| chr1  | Ankar         | LastExon | N | 72689554  | 72689885  | 3  | 81.8  | 63.8 | 75.9 | 52.6 |
| chr11 | Car4          | LastExon | N | 84779113  | 84779556  | 2  | 76.9  | 48.6 | 82.4 | 59.1 |
| chr6  | Ogg1          | LastExon | N | 113283836 | 113284180 | 3  | 47.6  | 22.4 | 51.5 | 28.4 |
| chr7  | Alg8          | LastExon | N | 104540038 | 104540668 | 3  | 83.3  | 51.3 | 76.1 | 53.1 |
| chr19 | 9930021J03Rik | LastExon | N | 29788892  | 29794096  | 26 | 89.1  | 53.0 | 86.6 | 63.8 |
| chr1  | Gls           | LastExon | N | 52220294  | 52223158  | 15 | 100.0 | 70.6 | 91.0 | 69.2 |
| chr11 | Mien1         | LastExon | N | 98299022  | 98299459  | 4  | 50.7  | 29.1 | 41.6 | 19.8 |
| chr10 | Asf1a         | LastExon | N | 53327471  | 53329021  | 6  | 77.8  | 15.6 | 83.9 | 62.1 |
| chr2  | Pmpca         | LastExon | N | 26250939  | 26252641  | 9  | 96.7  | 49.1 | 78.4 | 56.7 |
| chr5  | Htt           | LastExon | N | 35251281  | 35255170  | 19 | 90.7  | 48.4 | 71.5 | 49.9 |
| chr1  | D630023F18Rik | LastExon | N | 65153887  | 65155379  | 8  | 97.0  | 80.0 | 93.8 | 72.2 |
| chr19 | Tmem223       | LastExon | N | 8846538   | 8846965   | 3  | 86.0  | 27.5 | 77.5 | 56.2 |
| chr5  | Ttyh3         | LastExon | N | 141096532 | 141099485 | 15 | 80.2  | 57.4 | 80.6 | 59.5 |
| chr5  | 3110082117Rik | LastExon | N | 139835693 | 139836684 | 5  | 53.3  | 34.8 | 59.3 | 38.9 |
| chr9  | Al593442      | LastExon | N | 52481147  | 52486622  | 20 | 26.7  | 8.2  | 42.5 | 22.3 |
| chr6  | Clec9a        | LastExon | N | 129372244 | 129374782 | 13 | 69.8  | 22.9 | 54.4 | 34.3 |
| chr9  | Kank2         | LastExon | N | 21571217  | 21573448  | 12 | 72.6  | 56.4 | 69.7 | 49.9 |
| chr11 | Ramp3         | LastExon | N | 6576486   | 6577478   | 5  | 50.1  | 4.9  | 66.9 | 47.0 |
| chr17 | Noxo1         | LastExon | N | 24837066  | 24837474  | 3  | 20.0  | 1.8  | 20.6 | 0.9  |
| chr10 | Cdk2          | LastExon | N | 128134995 | 128136266 | 7  | 64.6  | 42.3 | 65.2 | 45.6 |
| chr14 | Rnase1        | LastExon | N | 51764677  | 51765594  | 5  | 60.1  | 41.2 | 73.7 | 54.3 |
| chr8  | Kxd1          | LastExon | N | 73037295  | 73038067  | 4  | 98.8  | 63.1 | 79.5 | 60.3 |
| chr12 | Tex21         | LastExon | N | 77299677  | 77299938  | 2  | 84.8  | 67.5 | 82.9 | 63.8 |
| chr16 | Muc13         | LastExon | N | 33818961  | 33820013  | 5  | 91.2  | 73.0 | 85.0 | 66.0 |

|       |          |          |   |           |           |    |      |      |      |      |
|-------|----------|----------|---|-----------|-----------|----|------|------|------|------|
| chr1  | Ap1s3    | LastExon | N | 79603451  | 79605777  | 10 | 91.4 | 59.1 | 83.0 | 64.3 |
| chr19 | Npas4    | LastExon | N | 4984355   | 4985096   | 2  | 34.2 | 10.0 | 66.0 | 47.4 |
| chr7  | Kcne3    | LastExon | N | 107332648 | 107333379 | 5  | 88.3 | 58.7 | 87.3 | 68.9 |
| chr15 | Rpl37    | LastExon | N | 5068567   | 5069140   | 4  | 87.0 | 64.0 | 77.1 | 58.8 |
| chr14 | Mrpl52   | LastExon | N | 55048419  | 55048587  | 2  | 58.1 | 39.4 | 72.4 | 54.2 |
| chr3  | Muc1     | LastExon | N | 89036946  | 89037291  | 3  | 53.8 | 28.0 | 58.3 | 40.2 |
| chr2  | Tubb4b   | LastExon | N | 25077678  | 25078888  | 7  | 86.5 | 66.8 | 77.9 | 59.9 |
| chr4  | Gnb1     | LastExon | N | 154931580 | 154933378 | 10 | 73.6 | 55.5 | 76.2 | 58.1 |
| chr19 | Banf1    | LastExon | N | 5364640   | 5365158   | 3  | 90.2 | 70.1 | 90.0 | 72.1 |
| chr3  | Cd1d1    | LastExon | N | 86799758  | 86800523  | 5  | 54.0 | 37.3 | 56.0 | 38.1 |
| chr7  | Pycard   | LastExon | N | 135134887 | 135136479 | 8  | 65.2 | 37.2 | 39.7 | 21.8 |
| chr11 | Map3k14  | LastExon | N | 103081078 | 103082503 | 7  | 77.3 | 54.3 | 69.8 | 52.0 |
| chr10 | Madcam1  | LastExon | N | 79130982  | 79131281  | 3  | 64.6 | 33.3 | 86.5 | 69.1 |
| chr4  | Cyp2j9   | LastExon | N | 96235120  | 96235593  | 2  | 82.4 | 63.4 | 87.3 | 70.0 |
| chr16 | Hmgn1    | LastExon | N | 96343195  | 96344024  | 5  | 89.2 | 69.2 | 88.8 | 71.6 |
| chr3  | Dennd2d  | LastExon | N | 106303454 | 106305948 | 13 | 91.0 | 74.9 | 87.2 | 70.2 |
| chr14 | Adam28   | LastExon | N | 69223055  | 69224653  | 8  | 87.2 | 61.6 | 77.9 | 60.8 |
| chr17 | Cdsn     | LastExon | N | 35691606  | 35694125  | 13 | 68.2 | 44.5 | 71.2 | 54.3 |
| chr4  | Orc1     | LastExon | N | 108286886 | 108287436 | 3  | 76.2 | 53.3 | 66.4 | 49.6 |
| chr10 | Rdh1     | LastExon | N | 127202377 | 127205355 | 15 | 94.7 | 77.2 | 94.9 | 78.2 |
| chr1  | Kcne4    | LastExon | N | 78814186  | 78816600  | 13 | 55.5 | 31.6 | 67.3 | 50.6 |
| chr11 | Slc13a5  | LastExon | N | 72055496  | 72057138  | 9  | 80.6 | 65.3 | 75.6 | 58.9 |
| chr15 | Atf4     | LastExon | N | 80087064  | 80087971  | 5  | 23.0 | 2.7  | 24.1 | 7.6  |
| chr2  | Cstad    | LastExon | N | 30463680  | 30464465  | 4  | 68.1 | 42.3 | 48.6 | 32.0 |
| chr4  | Tex38    | LastExon | N | 115452439 | 115453208 | 4  | 31.1 | 10.5 | 25.7 | 9.2  |
| chr19 | Ifit2    | LastExon | N | 34647557  | 34651024  | 16 | 76.5 | 56.9 | 75.0 | 58.5 |
| chr9  | Tmem202  | LastExon | N | 59366492  | 59367081  | 3  | 79.2 | 51.5 | 73.0 | 56.5 |
| chr7  | Fam24a   | LastExon | N | 138480013 | 138480230 | 2  | 62.7 | 37.8 | 57.6 | 41.1 |
| chr14 | Mdp1     | LastExon | N | 56276716  | 56277911  | 6  | 39.7 | 23.6 | 37.5 | 21.2 |
| chr4  | Zswim5   | LastExon | N | 116659076 | 116661710 | 13 | 55.3 | 37.7 | 53.0 | 36.7 |
| chr5  | Igfbp7   | LastExon | N | 77778265  | 77778524  | 2  | 65.3 | 42.9 | 76.5 | 60.4 |
| chr11 | Tmem106a | LastExon | N | 101451647 | 101453099 | 8  | 94.3 | 63.4 | 50.4 | 34.7 |
| chr11 | Hoxb5    | LastExon | N | 96166204  | 96167435  | 4  | 78.6 | 46.7 | 52.7 | 37.0 |
| chr4  | Mxra8    | LastExon | N | 155217414 | 155218211 | 5  | 87.7 | 48.4 | 83.5 | 67.9 |
| chr5  | Grxcr1   | LastExon | N | 68557331  | 68557637  | 2  | 79.6 | 59.5 | 71.8 | 56.4 |
| chr10 | Lrriq1   | LastExon | N | 102525832 | 102526143 | 2  | 63.8 | 45.6 | 48.0 | 32.6 |
| chr16 | Abhd10   | LastExon | N | 45729838  | 45730106  | 2  | 34.9 | 14.1 | 34.4 | 19.0 |
| chr5  | Slc15a4  | LastExon | N | 128076036 | 128077142 | 6  | 94.1 | 71.3 | 88.4 | 73.0 |
| chr6  | Ube2h    | LastExon | N | 30161289  | 30165083  | 19 | 75.8 | 44.5 | 74.9 | 59.7 |
| chr16 | Parn     | LastExon | N | 13538057  | 13538995  | 5  | 39.3 | 6.1  | 44.4 | 29.4 |

**Table S3: Significantly enriched GO categories associated with mDMR genes**

| Gene Cat. | CGI Status | Methylation | GO Category        | Term                                                                    | Genes | Count | %    | P-Value  | Benjamini |
|-----------|------------|-------------|--------------------|-------------------------------------------------------------------------|-------|-------|------|----------|-----------|
| Gene body | CGI        | Gain        | Biological process | <a href="#">embryonic organ development</a>                             |       | 20    | 3.4  | 8.60E-05 | 9.50E-03  |
| Gene body | CGI        | Gain        | Biological process | <a href="#">intracellular signaling cascade</a>                         |       | 48    | 8.1  | 1.10E-04 | 1.00E-02  |
| Gene body | CGI        | Gain        | Biological process | <a href="#">regulation of RNA metabolic process</a>                     |       | 69    | 11.7 | 1.10E-04 | 1.00E-02  |
| Gene body | CGI        | Gain        | Biological process | <a href="#">regulation of transcription, DNA-dependent</a>              |       | 69    | 11.7 | 7.10E-05 | 1.10E-02  |
| Gene body | CGI        | Gain        | Biological process | <a href="#">cell morphogenesis involved in differentiation</a>          |       | 18    | 3.1  | 1.60E-04 | 1.40E-02  |
| Gene body | CGI        | Gain        | Biological process | <a href="#">embryonic morphogenesis</a>                                 |       | 24    | 4.1  | 3.60E-04 | 2.20E-02  |
| Gene body | CGI        | Gain        | Biological process | <a href="#">branching morphogenesis of a tube</a>                       |       | 11    | 1.9  | 3.80E-04 | 2.30E-02  |
| Gene body | CGI        | Gain        | Biological process | <a href="#">ion homeostasis</a>                                         |       | 21    | 3.6  | 3.90E-04 | 2.30E-02  |
| Gene body | CGI        | Gain        | Biological process | <a href="#">glycosphingolipid biosynthetic process</a>                  |       | 4     | 0.7  | 4.60E-04 | 2.60E-02  |
| Gene body | CGI        | Gain        | Biological process | <a href="#">anterior/posterior pattern formation</a>                    |       | 14    | 2.4  | 5.50E-04 | 2.90E-02  |
| Gene body | CGI        | Gain        | Biological process | <a href="#">regionalization</a>                                         |       | 17    | 2.9  | 5.50E-04 | 2.90E-02  |
| Gene body | CGI        | Gain        | Biological process | <a href="#">pattern specification process</a>                           |       | 20    | 3.4  | 6.90E-04 | 3.30E-02  |
| Gene body | CGI        | Gain        | Biological process | <a href="#">regulation of cell development</a>                          |       | 14    | 2.4  | 7.90E-04 | 3.60E-02  |
| Gene body | CGI        | Gain        | Biological process | <a href="#">dorsal/ventral neural tube patterning</a>                   |       | 5     | 0.8  | 9.90E-04 | 4.20E-02  |
| Gene body | CGI        | Gain        | Biological process | <a href="#">regulation of small GTPase mediated signal transduction</a> |       | 17    | 2.9  | 1.10E-03 | 4.40E-02  |
| Gene body | CGI        | Gain        | Cellular component | <a href="#">plasma membrane</a>                                         |       | 139   | 23.6 | 3.20E-10 | 1.00E-07  |
| Gene body | CGI        | Gain        | Cellular component | <a href="#">synapse</a>                                                 |       | 27    | 4.6  | 2.70E-06 | 2.80E-04  |
| Gene body | CGI        | Gain        | Cellular component | <a href="#">cell junction</a>                                           |       | 32    | 5.4  | 2.30E-05 | 1.80E-03  |
| Gene body | CGI        | Gain        | Cellular component | <a href="#">myosin complex</a>                                          |       | 9     | 1.5  | 3.90E-04 | 1.50E-02  |
| Gene body | CGI        | Gain        | Cellular component | <a href="#">cytoskeleton</a>                                            |       | 54    | 9.2  | 3.60E-04 | 1.60E-02  |
| Gene body | CGI        | Gain        | Cellular component | <a href="#">cell projection</a>                                         |       | 32    | 5.4  | 8.30E-04 | 2.60E-02  |
| Gene body | CGI        | Gain        | Cellular component | <a href="#">clathrin-coated vesicle</a>                                 |       | 11    | 1.9  | 9.60E-04 | 2.70E-02  |
| Gene body | CGI        | Gain        | Cellular component | <a href="#">Golgi cisterna</a>                                          |       | 5     | 0.8  | 7.80E-04 | 2.70E-02  |
| Gene body | CGI        | Gain        | Cellular component | <a href="#">organelle subcompartment</a>                                |       | 5     | 0.8  | 7.80E-04 | 2.70E-02  |
| Gene body | CGI        | Gain        | Molecular function | <a href="#">small GTPase regulator activity</a>                         |       | 24    | 4.1  | 1.10E-07 | 5.60E-05  |
| Gene body | CGI        | Gain        | Molecular function | <a href="#">transcription regulator activity</a>                        |       | 59    | 10   | 5.40E-05 | 5.70E-03  |
| Gene body | CGI        | Gain        | Molecular function | <a href="#">calmodulin binding</a>                                      |       | 13    | 2.2  | 1.00E-04 | 8.80E-03  |
| Gene body | CGI        | Gain        | Molecular function | <a href="#">voltage-gated ion channel activity</a>                      |       | 16    | 2.7  | 1.90E-04 | 1.50E-02  |
| Gene body | CGI        | Gain        | Molecular function | <a href="#">lipid binding</a>                                           |       | 23    | 3.9  | 3.90E-04 | 2.00E-02  |
| Gene body | CGI        | Gain        | Molecular function | <a href="#">sequence-specific DNA binding</a>                           |       | 31    | 5.3  | 6.50E-04 | 3.10E-02  |
| Gene body | CGI        | Gain        | Molecular function | <a href="#">guanyl-nucleotide exchange factor activity</a>              |       | 13    | 2.2  | 1.10E-03 | 4.50E-02  |
| Gene body | CGI        | Loss        | Molecular function | <a href="#">cation channel activity</a>                                 |       | 15    | 4.4  | 3.60E-05 | 1.30E-02  |
| Gene body | CGI        | Loss        | Molecular function | <a href="#">metal ion transmembrane transporter activity</a>            |       | 16    | 4.7  | 5.20E-05 | 9.40E-03  |
| Gene body | CGI        | Loss        | Molecular function | <a href="#">channel activity</a>                                        |       | 17    | 5    | 2.00E-04 | 2.40E-02  |
| Gene body | CGI        | Loss        | Molecular function | <a href="#">passive transmembrane transporter activity</a>              |       | 17    | 5    | 2.00E-04 | 2.40E-02  |
| Gene body | CGI        | Loss        | Molecular function | <a href="#">ion channel activity</a>                                    |       | 16    | 4.7  | 4.00E-04 | 3.50E-02  |
| Gene body | non-CGI    | Loss        | Cellular component | <a href="#">extracellular matrix part</a>                               |       | 20    | 1.2  | 1.30E-04 | 1.60E-02  |
| Gene body | non-CGI    | Loss        | Cellular component | <a href="#">organelle lumen</a>                                         |       | 128   | 7.6  | 1.20E-04 | 1.90E-02  |
| Gene body | non-CGI    | Loss        | Cellular component | <a href="#">intracellular non-membrane-bounded organelle</a>            |       | 198   | 11.8 | 2.20E-04 | 2.10E-02  |
| Gene body | non-CGI    | Loss        | Cellular component | <a href="#">membrane-enclosed lumen</a>                                 |       | 132   | 7.8  | 1.00E-04 | 2.40E-02  |
| Gene body | non-CGI    | Loss        | Molecular function | <a href="#">purine nucleoside binding</a>                               |       | 187   | 11.1 | 3.90E-08 | 1.40E-05  |
| Gene body | non-CGI    | Loss        | Molecular function | <a href="#">ATP binding</a>                                             |       | 173   | 10.3 | 2.40E-07 | 5.10E-05  |
| Gene body | non-CGI    | Loss        | Molecular function | <a href="#">purine nucleotide binding</a>                               |       | 204   | 12.1 | 1.40E-05 | 2.50E-03  |
| Gene body | non-CGI    | Loss        | Molecular function | <a href="#">GTPase regulator activity</a>                               |       | 54    | 3.2  | 2.70E-05 | 4.10E-03  |
| Gene body | non-CGI    | Loss        | Molecular function | <a href="#">cytoskeletal protein binding</a>                            |       | 59    | 3.5  | 4.70E-05 | 4.40E-03  |
| Gene body | non-CGI    | Loss        | Molecular function | <a href="#">actin binding</a>                                           |       | 45    | 2.7  | 5.00E-05 | 4.40E-03  |
| Gene body | non-CGI    | Loss        | Molecular function | <a href="#">nucleoside-triphosphatase regulator activity</a>            |       | 54    | 3.2  | 4.30E-05 | 4.50E-03  |
| Promoter  | non-CGI    | Loss        | Biological process | <a href="#">oxidation reduction</a>                                     |       | 37    | 7.3  | 3.20E-06 | 5.20E-03  |
| Promoter  | non-CGI    | Loss        | Biological process | <a href="#">negative regulation of myeloid cell differentiation</a>     |       | 6     | 1.2  | 1.00E-04 | 8.00E-02  |
| Gene body | non-CGI    | Gain        | Biological process | <a href="#">vesicle-mediated transport</a>                              |       | 43    | 4.9  | 7.90E-06 | 2.00E-02  |
| Gene body | non-CGI    | Gain        | Cellular component | <a href="#">cell junction</a>                                           |       | 43    | 4.9  | 5.80E-06 | 2.10E-03  |
| Gene body | non-CGI    | Gain        | Cellular component | <a href="#">plasma membrane</a>                                         |       | 163   | 18.4 | 1.20E-04 | 8.50E-03  |
| Gene body | non-CGI    | Gain        | Cellular component | <a href="#">anchoring junction</a>                                      |       | 17    | 1.9  | 7.50E-05 | 9.10E-03  |
| Gene body | non-CGI    | Gain        | Cellular component | <a href="#">internal side of plasma membrane</a>                        |       | 28    | 3.2  | 1.20E-04 | 1.10E-02  |
| Gene body | non-CGI    | Gain        | Cellular component | <a href="#">cell projection</a>                                         |       | 46    | 5.2  | 7.40E-05 | 1.30E-02  |
| Gene body | non-CGI    | Gain        | Cellular component | <a href="#">cytoskeleton</a>                                            |       | 72    | 8.1  | 6.00E-04 | 2.40E-02  |
| Gene body | non-CGI    | Gain        | Cellular component | <a href="#">Golgi apparatus</a>                                         |       | 47    | 5.3  | 1.70E-03 | 4.90E-02  |
| Gene body | non-CGI    | Gain        | Molecular function | <a href="#">purine nucleotide binding</a>                               |       | 122   | 13.8 | 8.20E-07 | 6.20E-04  |
| Gene body | non-CGI    | Gain        | Molecular function | <a href="#">ATP binding</a>                                             |       | 96    | 10.8 | 8.10E-06 | 8.70E-04  |
| Gene body | non-CGI    | Gain        | Molecular function | <a href="#">protein domain specific binding</a>                         |       | 23    | 2.6  | 2.30E-05 | 1.90E-03  |
| Gene body | non-CGI    | Gain        | Molecular function | <a href="#">cytoskeletal protein binding</a>                            |       | 35    | 4    | 1.90E-04 | 1.40E-02  |
| Gene body | non-CGI    | Gain        | Molecular function | <a href="#">protein kinase activity</a>                                 |       | 44    | 5    | 3.00E-04 | 1.90E-02  |
| Gene body | non-CGI    | Gain        | Molecular function | <a href="#">Rab guanyl-nucleotide exchange factor activity</a>          |       | 4     | 0.5  | 3.00E-04 | 2.00E-02  |
| Gene body | non-CGI    | Gain        | Molecular function | <a href="#">SH3 domain binding</a>                                      |       | 12    | 1.4  | 4.90E-04 | 2.80E-02  |
| Gene body | non-CGI    | Gain        | Molecular function | <a href="#">transcription activator activity</a>                        |       | 24    | 2.7  | 7.00E-04 | 3.70E-02  |
| Gene body | non-CGI    | Gain        | Molecular function | <a href="#">motor activity</a>                                          |       | 16    | 1.8  | 7.80E-04 | 3.80E-02  |

**Table S4: Age-adjusted regression analysis of correlation between DNA methylation and gene expression**

| Gene    | Adjusted for age |                | FDR  |      |
|---------|------------------|----------------|------|------|
|         | Correlation      | <i>P</i> value |      |      |
| Non-CGI | Rnf43            | -0.45          | 0.09 | 0.13 |
|         | Zbtb22           | -0.68          | 0.01 | 0.04 |
|         | Fam109a          | -0.38          | 0.18 | 0.20 |
|         | Adamts15         | -0.65          | 0.01 | 0.03 |
|         | Mif              | 0.37           | 0.20 | 0.20 |
| CGI     | B4galnt1         | 0.52           | 0.01 | 0.03 |
|         | Net37            | 0.50           | 0.01 | 0.03 |
|         | Lpar5            | 0.53           | 0.01 | 0.03 |
|         | Fkrp             | 0.42           | 0.03 | 0.10 |
|         | Phospho1         | 0.33           | 0.06 | 0.16 |

**Table S5: Composition of diets**

|                       |        | GF vs. CNV studies |             |              | FMT studies  |              |
|-----------------------|--------|--------------------|-------------|--------------|--------------|--------------|
|                       |        | CNV-1              | GF-1        | GF-2         | CNV-2        | GF-3         |
|                       |        | Harlan 2020        | Harlan 8656 | LabDiet 5021 | LabDiet 5V5R | LabDiet 5V0F |
| <b>Macronutrients</b> |        |                    |             |              |              |              |
| Protein               | %      | 19.1               | 24.5        | 21.5         | 19.8         | 19.0         |
| Fat (acid hydrolysis) | %      | 6.5                | 4.4         | 9.0          | 7.6          | 7.6          |
| Fiber (Crude)         | %      | 2.7                | 3.4         | 3.5          | 2.4          | 2.4          |
| Ash                   | %      | 5.1                | 6.5         | 5.5          | 5.0          | 5.0          |
| Metabolizable Energy  | kcal/g | 3.1                | 3.0         | 3.3          | 3.4          | 3.4          |
| <b>Vitamins</b>       |        |                    |             |              |              |              |
| Vitamin A             | IU/g   | 15                 | 37          | 30           | 18           | 30           |
| Vitamin D3            | IU/g   | 1.5                | 3.0         | 3.3          | 2.3          | 2.3          |
| Vitamin E             | IU/kg  | 110                | 134         | 59           | 100          | 140          |
| Vitamin B1            | mg/kg  | 17                 | 121         | 86           | 120          | 120          |
| Vitamin B2            | mg/kg  | 15                 | 17          | 8            | 14           | 27           |
| Niacin                | mg/kg  | 75                 | 128         | 89           | 120          | 120          |
| Vitamin B6            | mg/kg  | 18                 | 21          | 15           | 16           | 26           |
| Vitamin B12           | mg/kg  | 0.08               | 0.13        | 0.05         | 0.08         | 0.08         |
| Biotin                | mg/kg  | 0.4                | 0.9         | 0.3          | 0.4          | 0.9          |
| Folic Acid            | mg/kg  | 4                  | 8           | 3            | 3.6          | 8.6          |
| Choline               | mg/kg  | 1200               | 2530        | 2200         | 2100         | 2100         |
| <b>Minerals</b>       |        |                    |             |              |              |              |
| Calcium               | %      | 0.9                | 1.3         | 0.8          | 1.0          | 1.0          |
| Phosphorus            | %      | 0.7                | 1.0         | 0.8          | 0.6          | 0.6          |
| Sodium                | %      | 0.1                | 0.3         | 0.3          | 0.2          | 0.2          |
| Potassium             | %      | 0.4                | 0.9         | 0.8          | 0.5          | 0.5          |
| Chloride              | %      | 0.4                | 0.4         | 0.4          | 0.8          | 0.8          |
| Magnesium             | %      | 0.2                | 0.2         | 0.2          | 0.2          | 0.2          |
| Zinc                  | mg/kg  | 60                 | 87          | 140          | 110          | 110          |
| Manganese             | mg/kg  | 80                 | 109         | 130          | 140          | 140          |
| Copper                | mg/kg  | 15                 | 23          | 17           | 15           | 15           |
| Iodine                | mg/kg  | 6                  | 2           | 2            | 1.5          | 1.5          |
| Iron                  | mg/kg  | 200                | 347         | 220          | 240          | 240          |
| Selenium              | mg/kg  | 0.23               | 0.35        | 0.35         | 0.35         | 0.33         |
| <b>Amino Acids</b>    |        |                    |             |              |              |              |
| Threonine             | %      | 0.6                | 1.0         | 0.8          | 0.6          | 0.6          |
| Leucine               | %      | 2.3                | 2.0         | 1.6          | 2.5          | 2.4          |
| Isoleucine            | %      | 0.7                | 1.3         | 0.9          | 0.8          | 0.8          |
| Valine                | %      | 0.9                | 1.3         | 1.0          | 0.9          | 0.8          |
| Methionine            | %      | 0.5                | 0.4         | 0.7          | 0.6          | 0.6          |
| Cystine               | %      | 0.3                | 0.4         | 0.3          | 0.4          | 0.4          |
| Histidine             | %      | 0.4                | 0.6         | 0.5          | 0.4          | 0.4          |
| Arginine              | %      | 0.8                | 1.9         | 1.2          | 0.7          | 0.7          |

**Table S6. Primers and PCR conditions for genotyping assays**

| Gene                  | Primer Set                 | Sequence                          | Genotype   | PCR Product (bp) | PCR Annealing (°C) |
|-----------------------|----------------------------|-----------------------------------|------------|------------------|--------------------|
| Lgr5-EGFP             | 8060 (common)              | CTG CTC TCT GCT CCC AGT CT        | WT         | 298              | 55                 |
|                       | 8061 (WT reverse)          | ATA CCC CAT CCC TTT TGA GC        | Mut        | 174              |                    |
|                       | oIMR9402 (mutant reverse)  | GAA CTT CAG GGT CAG CTT GC        |            |                  |                    |
| Dnmt1 <sup>ff</sup>   | mDnmt1-1                   | GGG CCA GTT GTG TGA CTT GG        | WT         | 334              | 55                 |
|                       | mDnmt1-2                   | CTT GGG CCT GGA TCT TGG GGA       | F/F        | 368              |                    |
| Dnmt 3a <sup>ff</sup> | Dnmt3a_WT Forward          | TGAGTGGTGAGGCCCGGGCAT             | WT         | 200              | 55                 |
|                       | Dnmt3a_WT Reverse          | ATT CGA CCT GGT GAT TGG AG        | F/F        | 400              |                    |
|                       | Dnmt3a_MT Forward          | CTG TGG CAT CTC AGG GTG ATG AGC A | WT         | no band          |                    |
|                       | Dnmt3a_MT Reverse          | AAG CCC AGG CCC TCT AGG CAA GAT   | F/F        | 200              |                    |
| Villin-Cre            | oIMR1878(transgene)        | GTG TGG GAC AGA GAA CAA ACC       | Villin-Cre | 1100             | 55                 |
|                       | oIMR1879(transgene)        | ACA TCT TCA GGT TCT GCG GG        | WT         | 200              |                    |
|                       | oIMR8744(positive cntrl F) | CAA ATG TTG CTT GTC TGG TG        |            |                  |                    |
|                       | oIMR8745(positive cntrl R) | GTC AGT CGA GTG CAC AGT TT        |            |                  |                    |



**Table S7. Summary of WGBS results for genome-wide DNA methylation analysis**

| <b>Samples</b>                      | <b>Number of Reads</b> | <b>Coverage Depth</b> | <b>Mapping Efficiency (%)</b> | <b>Bisulfite Conversion Efficiency (%)</b> |
|-------------------------------------|------------------------|-----------------------|-------------------------------|--------------------------------------------|
| P0 ISCs                             | 1,143,947,860          | 21.0                  | 66.6                          | 98.4                                       |
| P0 differentiated epithelial cells  | 1,131,900,850          | 20.8                  | 72.0                          | 98.4                                       |
| P21 ISCs                            | 1,161,799,014          | 21.3                  | 66.5                          | 98.3                                       |
| P21 differentiated epithelial cells | 1,104,562,844          | 20.3                  | 69.5                          | 98.4                                       |

**Table S8. Bisulfite-pyrosequencing primers and sequenced regions for quantitative DNA methylation analysis**

|                                  | Gene     | Forward Primer                | Reverse Primer (5' Biotinylated) | Sequencing Primer                                                             | Sequenced Region                                                                                                          |
|----------------------------------|----------|-------------------------------|----------------------------------|-------------------------------------------------------------------------------|---------------------------------------------------------------------------------------------------------------------------|
| Global                           | Line1    | TGATAGTTTTTGAATAGGTAGAAGT     | CCCAAATAATACAACTCTCACTTAA        | TTGAGGTAGTATTTTGTGTG                                                          | GGTYGGGGAT AGTYGGTT                                                                                                       |
|                                  | IAP      | AAGGAAAGGGGGAGATGTTGG         | CRCCTAAAACRTATCACTCCCTAA         | ATTTTATGTGTTTTGTTTTT                                                          | TTYGTGAYGT TAATTYGGTY GATGG                                                                                               |
| mDMR genes with methylation loss | Adamsl5  | GGAATGGGGTTTTAAAGTATATGTAG    | AACTACCTATCTCCCTTCAATCTA         | AGTAGTTTATATAATTGGGTG                                                         | T TYGGGGTAG TAYGTTTTTA                                                                                                    |
|                                  | Fam109a  | TGGTTTGAATTAGTTAAGTTAGGA      | ACTCTCCCTACTACAAACATAAAAT        | GTGTTTAGTTTTGTAGGT                                                            | GAGTTYGGGT AGAAGTAGGG                                                                                                     |
|                                  | Wnt11    | GATTTTTGGGTTGGGTTGTTGGTAGAA   | ATATCAAATATCCCTTCATCTCCAAATCA    | GTTGGTAGAAGGAAGTT                                                             | TYGGGATAGT TGTGTAGTGG GGGTAGGGAT TYGTTAGGGT                                                                               |
|                                  | Apc2     | TTTTTGGAGGGGTTTGAGGAG         | CCCCAAAACCTCTACTAC               | TTGGTTTTGGTGAGG<br>ATTTTTTTTAGGTGTTTATTTTA                                    | TYGAGTTGGG TAGGGYGTGG YGAGTATTY GGGTTT<br>GTTYGTAGY GGGGGYGTAG                                                            |
|                                  | Mif      | GTAGAGTTTTGTTTTAAGAAGGGATTTT  | ATAAAACCACACCCTTCCAACTAA         | GTATAGAGATTAGTAAGTTGTTT                                                       | YGGGGYGTAG GAGTTTAGGT                                                                                                     |
|                                  | Rnf43    | TGGGATGAAGGTAGAGGAGGTATA      | AAACACCATCAACCCTTACC             | GGAGTAGAAAGTTGGTT                                                             | YGGGTAGTTT GTATTAYGTG GGTAAGGGTT                                                                                          |
|                                  | Zbtb22   | GAAGTTTATGTGGAGGGATAGTTTTATG  | CTCCACCCCACTAAAATC               | GGGTGTGGGTGGGGT<br>TATAGTGGGTGGGGG                                            | YGGATTGGA TYGGGTTTTG GATTTGGATT<br>TAGTGGYGAT GAGGTAAATT YGTTAYGTT TTYGTTTTAT AGGYGTGTTT                                  |
|                                  | lpmk     | GGGGAGGTTTTTTTTAAAGGATT       | CTTCTCCACCCTTATCTTACTCCAAC       | GGTTTGGAGTGTAATAATAATTTT<br>GGTGGGTAAGAGTTTAT                                 | TATTTGTYG GYTTTTYGT TAAYGGGATG TYGGTGGGTA<br>YGAAGGYGTA TTYGAGGTAT                                                        |
|                                  | Al464131 | GTTGGGAGGAAGTTGTGT            | CAACCCAAATAAAAAACACTAAATCATT     | GAGTAAGAGATGTTTTTGGGAGA<br>ATTAGTTTAGATGGTTAGTAAGAAT<br>GTATTAGGGGGTATTTTTGAG | TGTTGYGGY GATTGGTATG GYGGYGTAGA<br>YGTAGTTATT TGTAYGAGY GAYGTTTATT TATTTGAYGT<br>YGTATTGGT TATTTTTAYG YGTYGTGTT           |
|                                  | B4galnt1 | GGGGAGAGGGAAAAAGATGTTAGG      | ACTCTCCTCCCTACCAAT               | ATTTTTTAGGTTGGTT<br>GGTGTTTAAGTAATTATTAAT<br>GGTTGGAGAAGTTTGTG                | YGTAGGTYG AATTTGGYGG T<br>AYGTGTTGT GGTGGAYGAY GATTTGTTT TAYGGYGYG TA<br>GAYGTGTYG AGAAGAYGT                              |
| mDMR genes with methylation gain | Lpar5    | TGGTTTTTTTTAGGTTTTTGTGTTAG    | ACCTACCCTTCCACAATTC              | GTGTGGGTTTTATTTTGT                                                            | TGTTYGTTGT GTTYGYGTT YGYGTGATA GTTYGTTTTA                                                                                 |
|                                  | Phospho1 | GAAGTAGGAGTTTTGTTTGGTTATGAA   | CTTCCCTACTCCCAAAA                | TTGGTTATGAATTGTAATAAA<br>GTTGTATGTATTTATTGTAGTAGT                             | TYGTTTATGT TTGGYGATAG GGGGATGGTT TYGTAGATAG<br>T TTYGYGATA GGTGGTAYGT AGGTTTTYGG GTAGTTGTTG                               |
|                                  | Fkrp     | AGTTTTTTTTTATGTGTTATGTTATAATA | CCACTACCACCAACTAACTAAATCCTACT    | GTTATAATATTAGTTAGAAAATTTT<br>GGATTTTTGTTATTGGTTTT                             | YGGGTTYGGG GTTTTYGYG GATTTTTGTT<br>YGAGTTATYG TTTTGATTY GGAATTTGAG                                                        |
|                                  | Amn      | TGAGAGTGGGGTTTTAAGTTTGT       | CACCCCAAAAATCACACATTATCCT        | GAGGTGAGTGAGTTT<br>TTATTTTAGTGTTTTTATTAGATG                                   | TGATYGGGTA TAGYGYGAGG GTYGGTTTTY GTT<br>TTGTYGTGGA TTTGYGYGTT                                                             |
|                                  | Mab21l2  | GTTATTGAGAGGTTGGTTAGGTAGTT    | AATAACCTATACCCACATCCC            | AGGTAGTTTTAGGTGG<br>GAGAGGATTTGTTTTATAGT<br>GGAGAGTAAGTTGAATTTT               | YGGTTTTYGTAG YGTTTTTAG TATYAGAGG<br>YGTATTAG TAAGYGGTTT TTYGTTTTAT YGAATTGAG<br>TYGGTTTTGA TTTYGTTAT TYGATTGGGG TYGGTTAGG |

**Table S9. Real-time Taqman assays for gene expression analysis**

| <b>Gene</b>    | <b>Assay ID</b> | <b>RefSeq</b>  | <b>Exon Boundary</b> |
|----------------|-----------------|----------------|----------------------|
| Rnf43          | Mm01307031_m1   | NM_172448.3    | 9-10                 |
| Zbtb22         | Mm00457884_s1   | NM_020625.3    | -                    |
| Fam109a        | Mm01199886_m1   | NM_175474.3    | 3-4                  |
| Adamtsl5       | Mm01149530_g1   | NM_001285435.1 | -                    |
| Mif            | Mm01611157_gH   | NM_010798.2    | 2-3                  |
| Al464131       | Mm01222105_m1   | NM_001085515.2 | 1-2                  |
| B4galnt1       | Mm00484649_g1   | NM_001244618.1 | 1-2                  |
| Lpar5          | Mm01190819_m1   | NM_001163268.1 | 1-2                  |
| Phospho1       | Mm00462190_m1   | NM_153104.3    | 1-2                  |
| Fkrp           | Mm00557870_m1   | NM_173430.2    | 2-3                  |
| Dnmt1          | Mm01151063_m1   | NM_001199431.1 | 5-6                  |
| Dnmt3a         | Mm00432881_m1   | NM_007872.4    | 17-18                |
| Dnmt3b         | Mm01240113_m1   | AF068627.2     | 19-20                |
| $\beta$ -Actin | mm00607939_s1   | NM_007393.3    | 6-6                  |
